# Supplementary material for: Discovering and Validating Neoantigens by Mass Spectrometry-based Immunopeptidomics and Deep Learning
Source: bioRxiv preprint, doi:10.1101/2022.07.05.497667, version 3 (2024-05-06)
Supplement: Supplementary Data 2 [file 497667_file10.xlsx]

## Sheet: Supp Data 2
Supplementary Data 2. The database and de novo peptides identified from MS-based immunopeptidomics analysis of native tumor tissues of 5 patients with cervical cancer.
The immunogenicity prediction results are provided for the de novo peptides (last column).

## Sheet: patient1_database
Order	Peptide	-10LgP	Mass	Tag Length	CAA (%)	Length	ppm	m/z	z	RT	Delta RT	MS2 Correlation	Scan	Source File	Precursor Id	1/k0 Start	1/k0 End	Delta 1/k0	Area Sample 5	Intensity Sample 5	#Spec	#Spec Sample 5	#Feature	#Feature Sample 5	PTM	AScore	Positional Confidence	tag(>=0.0%)	Accession	Found By	Stripped	IEDB Epitope	T Cell Assay
1	ALSDHHIYL	41.1	1067.54	9	100	9	-6.7	534.774	2	28.7082	3.7315	0.82	1418781	Neo_sh14_patient1_HLAI_0412_HM1114_tims_Slot1-36_1_3662.d	32601	0.8734	0.8831	0.0018	6810	46600	6	6	1	1			5 9 9 9 8 14 55 2 2	ALSDHHIYL	P04075|ALDOA_HUMAN	DB Search	ALSDHHIYL	ALSDHHIYL	ALSDHHIYL
2	RLFVGSIPK	34.46	1015.62	9	44.4	9	0.5	508.816	2	29.4842	2.2315	0.89	1452344	Neo_sh14_patient1_HLAI_0412_HM1114_tims_Slot1-36_1_3662.d	33116	0.8578	0.8675	0.0273	102000	538000	9	9	2	2			0 0 0 2 2 11 36 0 0	RLFVGSIPK	O60506|HNRPQ_HUMAN:O43390|HNRPR_HUMAN	DB Search	RLFVGSIPK	RLFVGSIPK	RLFVGSIPK
3	YLLPAIVHI	34.51	1037.63	9	77.8	9	9.3	519.826	2	54.6951	-8.0487	0.86	2699356	Neo_sh14_patient1_HLAI_0412_HM1114_tims_Slot1-36_1_3662.d	55516	0.8726	0.8823	0.0026			1	1	0	0			4 4 24 16 10 10 25 0 0	YLLPAIVHI	Q92841|DDX17_HUMAN:P17844|DDX5_HUMAN	DB Search	YLLPAIVHI	YLLPAIVHI	YLLPAIVHI
4	ALYSGVHKK	48.75	1001.57	9	88.9	9	0.4	501.79	2	6.2599	-1.4431	0.96	305274	Neo_sh14_patient1_HLAI_0412_HM1114_tims_Slot1-36_1_3662.d	2334	0.8431	0.8528	0.022	29600	245000	3	3	1	1			5 9 88 23 5 5 2 0 4	ALYSGVHKK	O94885|SASH1_HUMAN	DB Search	ALYSGVHKK	ALYSGVHKK	ALYSGVHKK
5	TVNSPAIYK	38.27	991.534	9	55.6	9	-3.1	496.773	2	19.7125	-1.8047	0.9	980084	Neo_sh14_patient1_HLAI_0412_HM1114_tims_Slot1-36_1_3662.d	23528	0.7978	0.8075	0.0374	343	5700	1	1	1	1			0 0 25 25 3 2 2 0 0	TVNSPAIYK	Q9Y3A2|UTP11_HUMAN	DB Search	TVNSPAIYK	TVNSPAIYK	TVNSPAIYK
6	ALM(+15.99)DEVVKA	17.34	990.506	9	22.2	9	-0.1	496.26	2	22.9343	-0.3256	0.72	1140650	Neo_sh14_patient1_HLAI_0412_HM1114_tims_Slot1-36_1_3662.d	28034	0.809	0.8187	0.0361			1	1	0	0	Oxidation (M)	M3:Oxidation (M):1000.00	0 0 28 14 0 0 0 0 0	ALM(+15.99)DEVVKA	P00558|PGK1_HUMAN	DB Search	ALMDEVVKA	ALMDEVVKA	ALMDEVVKA
7	RTNWPNTGK	52.6	1072.54	9	44.4	9	2	537.279	2	10.221	-0.7055	0.88	504631	Neo_sh14_patient1_HLAI_0412_HM1114_tims_Slot1-36_1_3662.d	8911	0.8327	0.8423	0.0325	8890	77000	2	2	1	1			1 0 0 7 1 1 14 10 5	RTNWPNTGK	Q6NUQ1|RINT1_HUMAN	DB Search	RTNWPNTGK	RTNWPNTGK	RTNWPNTGK
8	SLAQYNPKL	39.88	1032.56	9	55.6	9	3.6	517.289	2	31.8871	0.5915	0.71	1575537	Neo_sh14_patient1_HLAI_0412_HM1114_tims_Slot1-36_1_3662.d	35133	0.8454	0.8551	0.0197			1	1	0	0			0 0 17 6 3 3 6 0 0	SLAQYNPKL	P27986|P85A_HUMAN:Q92569|P55G_HUMAN	DB Search	SLAQYNPKL	SLAQYNPKL	SLAQYNPKL
9	TSALPIIQK	40.99	969.586	9	66.7	9	4.1	485.802	2	34.7028	-6.7748	0.9	1712406	Neo_sh14_patient1_HLAI_0412_HM1114_tims_Slot1-36_1_3662.d	37974	0.8024	0.8121	0.0327			2	2	0	0			4 4 13 13 1 3 5 0 0	TSALPIIQK	Q99541|PLIN2_HUMAN	DB Search	TSALPIIQK	TSALPIIQK	TSALPIIQK
10	ILDDIGHGV	27.9	937.487	9	66.7	9	-0.6	469.75	2	36.5215	2.7061	0.7	1802569	Neo_sh14_patient1_HLAI_0412_HM1114_tims_Slot1-36_1_3662.d	40009	0.8032	0.8129	0.0019			1	1	0	0			5 68 25 25 11 11 0 0 0	ILDDIGHGV	Q9NYB9|ABI2_HUMAN	DB Search	ILDDIGHGV	ILDDIGHGV	ILDDIGHGV
11	ILDKKVEKV	41.51	1070.67	9	100	9	0	536.342	2	13.0634	0.0555	0.81	647132	Neo_sh14_patient1_HLAI_0412_HM1114_tims_Slot1-36_1_3662.d	13712	0.8807	0.8904	0.0344	206000	2170000	6	6	1	1			5 93 50 38 14 10 12 12 5	ILDKKVEKV	Q58FF7|H90B3_HUMAN:P08238|HS90B_HUMAN	DB Search	ILDKKVEKV	ILDKKVEKV	ILDKKVEKV
12	RLASYLDKV	23.88	1063.6	9	22.2	9	8	532.813	2	27.4215	-1.3668	0.73	1355460	Neo_sh14_patient1_HLAI_0412_HM1114_tims_Slot1-36_1_3662.d	31704	0.8586	0.8683	0.0365			1	1	0	0			0 0 0 0 0 48 86 0 0	RLASYLDKV	P08727|K1C19_HUMAN:P02533|K1C14_HUMAN:P13645|K1C10_HUMAN:Q04695|K1C17_HUMAN:P35527|K1C9_HUMAN:Q99456|K1C12_HUMAN:P08779|K1C16_HUMAN:P19012|K1C15_HUMAN	DB Search	RLASYLDKV	RLASYLDKV	RLASYLDKV
13	IM(+15.99)LEALERV	27.39	1088.59	9	66.7	9	-2.5	545.301	2	46.5757	1.3099	0.94	2296697	Neo_sh14_patient1_HLAI_0412_HM1114_tims_Slot1-36_1_3662.d	49433	0.8513	0.861	0.0439	2210	25000	2	2	1	1	Oxidation (M)	M2:Oxidation (M):1000.00	5 19 64 33 4 4 0 0 0	IM(+15.99)LEALERV	A8MWD9|RUXGL_HUMAN:P62308|RUXG_HUMAN	DB Search	IMLEALERV	IMLEALERV	IMLEALERV
14	GTSSVIVSR	21.35	904.498	9	44.4	9	-8	453.253	2	15.2815	-0.089	0.83	758857	Neo_sh14_patient1_HLAI_0412_HM1114_tims_Slot1-36_1_3662.d	17113	0.7823	0.792	0.0228			1	1	0	0			0 0 90 67 59 6 0 0 0	GTSSVIVSR	Q9UKB1|FBW1B_HUMAN	DB Search	GTSSVIVSR	GTSSVIVSR	GTSSVIVSR
15	RSYHLQIVTK	47.32	1243.7	10	60	10	10.3	415.579	3	18.8427	1.303	0.67	936667	Neo_sh14_patient1_HLAI_0412_HM1114_tims_Slot1-36_1_3662.d	22339	0.7487	0.7583	0.0065			2	2	0	0			0 0 9 54 61 61 25 3 0 0	RSYHLQIVTK	P14902|I23O1_HUMAN	DB Search	RSYHLQIVTK	RSYHLQIVTK	RSYHLQIVTK
16	FLYDDNQRV	28.34	1168.55	9	55.6	9	2.7	585.284	2	31.8493	-0.8722	0.93	1573661	Neo_sh14_patient1_HLAI_0412_HM1114_tims_Slot1-36_1_3662.d	35093	0.8765	0.8862	0.0387			2	2	0	0			5 8 44 12 11 0 0 0 0	FLYDDNQRV	Q02880|TOP2B_HUMAN:P11388|TOP2A_HUMAN	DB Search	FLYDDNQRV	FLYDDNQRV	FLYDDNQRV
17	SSVPGVRLL	28.96	926.555	9	11.1	9	-7.4	464.281	2	42.6199	3.3729	0.91	2104571	Neo_sh14_patient1_HLAI_0412_HM1114_tims_Slot1-36_1_3662.d	46415	0.785	0.7947	0.0301			2	2	0	0			1 1 1 18 1 1 0 0 0	SSVPGVRLL	P08670|VIME_HUMAN	DB Search	SSVPGVRLL	SSVPGVRLL	SSVPGVRLL
18	RTIAPIIGR	38.8	995.624	9	77.8	9	3.9	498.821	2	23.3313	0.7439	0.78	1157723	Neo_sh14_patient1_HLAI_0412_HM1114_tims_Slot1-36_1_3662.d	28583	0.8369	0.8466	0.0182	1330	17200	1	1	1	1			5 5 5 7 1 1 11 8 5	RTIAPIIGR	Q99459|CDC5L_HUMAN	DB Search	RTIAPIIGR	RTIAPIIGR	RTIAPIIGR
19	LPHAPGVQM	24.52	948.485	9	77.8	9	3.7	475.252	2	32.4926	0.3835	0.82	1605474	Neo_sh14_patient1_HLAI_0412_HM1114_tims_Slot1-36_1_3662.d	35694	0.799	0.8086	0.0062			3	3	0	0			0 0 4 14 9 9 59 20 5	LPHAPGVQM	Q13547|HDAC1_HUMAN:Q92769|HDAC2_HUMAN	DB Search	LPHAPGVQM	LPHAPGVQM	LPHAPGVQM
20	AVFDGAQVTSK	35.34	1121.57	11	36.4	11	0.2	561.793	2	23.1995	-7.9457	0.78	1153930	Neo_sh14_patient1_HLAI_0412_HM1114_tims_Slot1-36_1_3662.d	28462	0.8625	0.8722	0.0327			1	1	0	0			0 0 40 40 9 0 0 8 0 0 0	AVFDGAQVTSK	O14683|P5I11_HUMAN	DB Search	AVFDGAQVTSK	AVFDGAQVTSK	AVFDGAQVTSK
21	SIFDGRVVAK	32.16	1090.61	10	80	10	-9.4	546.309	2	27.3458	1.1029	0.93	1351742	Neo_sh14_patient1_HLAI_0412_HM1114_tims_Slot1-36_1_3662.d	31658	0.8893	0.899	0.0159			1	1	0	0			2 2 38 27 0 0 5 5 10 5	SIFDGRVVAK	Q9UM00|TMCO1_HUMAN	DB Search	SIFDGRVVAK	SIFDGRVVAK	SIFDGRVVAK
22	YLNKEIEEA	35.54	1107.54	9	77.8	9	4	554.782	2	22.1005	-1.4514	0.78	1099066	Neo_sh14_patient1_HLAI_0412_HM1114_tims_Slot1-36_1_3662.d	26842	0.8602	0.8699	0.035			1	1	0	0			5 38 16 0 0 48 63 3 3	YLNKEIEEA	Q9Y5B0|CTDP1_HUMAN	DB Search	YLNKEIEEA	YLNKEIEEA	YLNKEIEEA
23	ALSGLAVRL	23.37	898.56	9	44.4	9	1	450.288	2	46.7452	-0.0636	0.88	2307907	Neo_sh14_patient1_HLAI_0412_HM1114_tims_Slot1-36_1_3662.d	49627	0.8052	0.8148	0.01			1	1	0	0			0 0 17 9 7 3 0 0 0	ALSGLAVRL	P0DMW4|SIL2A_HUMAN:P0DMW5|SIL2B_HUMAN:Q96HG1|SIM10_HUMAN	DB Search	ALSGLAVRL	ALSGLAVRL	ALSGLAVRL
24	KLDVGNAEV	29.63	943.497	9	77.8	9	3.1	472.757	2	23.7482	-1.838	0.78	1178510	Neo_sh14_patient1_HLAI_0412_HM1114_tims_Slot1-36_1_3662.d	29174	0.787	0.7966	0.0482	918	6400	2	2	1	1			5 0 0 10 10 21 71 49 5	KLDVGNAEV	P51572|BAP31_HUMAN	DB Search	KLDVGNAEV	KLDVGNAEV	KLDVGNAEV
25	RM(+15.99)LPHAPGV	36.41	992.523	9	55.6	9	-1.6	497.268	2	18.7753	2.9507	0.85	932868	Neo_sh14_patient1_HLAI_0412_HM1114_tims_Slot1-36_1_3662.d	22212	0.8036	0.8133	0.0416	4450	25000	3	3	1	1	Oxidation (M)	M2:Oxidation (M):1000.00	1 1 4 6 6 38 1 1 4	RM(+15.99)LPHAPGV	Q13547|HDAC1_HUMAN:Q92769|HDAC2_HUMAN	DB Search	RMLPHAPGV	RMLPHAPGV	RMLPHAPGV
26	HPRQEQIAL	24.07	1090.59	9	66.7	9	0.4	546.302	2	17.8951	1.7323	0.57	889357	Neo_sh14_patient1_HLAI_0412_HM1114_tims_Slot1-36_1_3662.d	20929	0.8451	0.8547	0.0501			1	1	0	0			5 5 0 0 0 4 4 7 5	HPRQEQIAL	Q9NZ08|ERAP1_HUMAN	DB Search	HPRQEQIAL	HPRQEQIAL	HPRQEQIAL
27	ASFDKAKLK	50.54	1006.58	9	100	9	0.6	504.298	2	10.8567	-7.3309	0.74	535069	Neo_sh14_patient1_HLAI_0412_HM1114_tims_Slot1-36_1_3662.d	9973	0.8342	0.8439	0.0409	1600	26600	1	1	1	1			5 60 66 25 19 16 8 8 5	ASFDKAKLK	P63313|TYB10_HUMAN	DB Search	ASFDKAKLK	ASFDKAKLK	ASFDKAKLK
28	NVIRDAVTY	38.47	1049.55	9	66.7	9	-4.4	525.78	2	28.4811	-6.2879	0.56	1407620	Neo_sh14_patient1_HLAI_0412_HM1114_tims_Slot1-36_1_3662.d	32456	0.8342	0.8439	0.0309			2	2	0	0			5 10 0 0 0 18 41 78 5	NVIRDAVTY	P62805|H4_HUMAN	DB Search	NVIRDAVTY	NVIRDAVTY	NVIRDAVTY
29	AM(+15.99)YDKGPFRSK	34.48	1314.64	11	36.4	11	2.3	658.328	2	12.0961	-0.2925	0.78	599729	Neo_sh14_patient1_HLAI_0412_HM1114_tims_Slot1-36_1_3662.d	12209	0.9133	0.923	0.0518			1	1	0	0	Oxidation (M)	M2:Oxidation (M):1000.00	0 0 10 10 22 3 0 0 0 0 0	AM(+15.99)YDKGPFRSK	P15559|NQO1_HUMAN	DB Search	AMYDKGPFRSK	AMYDKGPFRSK	AMYDKGPFRSK
30	AVYGQKEIHRK	55.01	1327.74	11	90.9	11	3.6	664.878	2	7.2321	-0.7178	0.49	354690	Neo_sh14_patient1_HLAI_0412_HM1114_tims_Slot1-36_1_3662.d	4014	0.963	0.9727	0.0421	3560	69700	5	5	1	1			5 11 18 5 5 21 10 5 2 1 5	AVYGQKEIHRK	Q13283|G3BP1_HUMAN	DB Search	AVYGQKEIHRK	AVYGQKEIHRK	AVYGQKEIHRK
31	RVQEAVESM(+15.99)VK	36.71	1290.66	11	45.5	11	2.2	646.339	2	13.6111	-0.2277	0.71	673701	Neo_sh14_patient1_HLAI_0412_HM1114_tims_Slot1-36_1_3662.d	14577	0.9323	0.9421	0.0228	272	5900	1	1	1	1	Oxidation (M)	M9:Oxidation (M):1000.00	0 0 1 1 0 0 11 4 4 5 5	RVQEAVESM(+15.99)VK	Q96C01|F136A_HUMAN	DB Search	RVQEAVESMVK	RVQEAVESMVK	RVQEAVESMVK
32	SLLTSSKGQLQK	51.04	1288.74	12	66.7	12	1.8	645.376	2	18.5765	0.6685	0.85	919603	Neo_sh14_patient1_HLAI_0412_HM1114_tims_Slot1-36_1_3662.d	21799	0.9782	0.9879	0.037	9560	98700	3	3	1	1			0 0 49 71 47 12 12 23 7 2 0 0	SLLTSSKGQLQK	Q99541|PLIN2_HUMAN	DB Search	SLLTSSKGQLQK	SLLTSSKGQLQK	SLLTSSKGQLQK
33	RVYDPASPQRR	44.75	1343.71	11	45.5	11	2.9	448.91	3	10.134	-1.0709	0.52	500841	Neo_sh14_patient1_HLAI_0412_HM1114_tims_Slot1-36_1_3662.d	8793	0.7583	0.768	0.0168	180	3100	2	2	1	1			0 0 0 3 11 3 4 4 0 0 0	RVYDPASPQRR	Q6RFH5|WDR74_HUMAN	DB Search	RVYDPASPQRR	RVYDPASPQRR	RVYDPASPQRR
34	SLFPNSPKWTSK	43.33	1390.72	12	75	12	-0.6	696.369	2	36.4401	0.2633	0.83	1795007	Neo_sh14_patient1_HLAI_0412_HM1114_tims_Slot1-36_1_3662.d	39791	0.9727	0.9825	0.0324	8130	56400	4	4	1	1			0 0 32 14 11 11 2 2 2 0 2 3	SLFPNSPKWTSK	P09237|MMP7_HUMAN	DB Search	SLFPNSPKWTSK	SLFPNSPKWTSK	SLFPNSPKWTSK
35	LPHQPLATY	37.08	1038.55	9	77.8	9	0	520.282	2	30.1548	-0.2473	0.76	1489628	Neo_sh14_patient1_HLAI_0412_HM1114_tims_Slot1-36_1_3662.d	33680	0.816	0.8257	0.0392	4970	60500	12	12	2	2			5 0 0 13 84 62 62 52 5	LPHQPLATY	Q16633|OBF1_HUMAN	DB Search	LPHQPLATY	LPHQPLATY	LPHQPLATY
36	TM(+15.99)LARLASA	27.61	948.506	9	44.4	9	0.8	475.261	2	22.7448	-5.6428	0.82	1131183	Neo_sh14_patient1_HLAI_0412_HM1114_tims_Slot1-36_1_3662.d	27747	0.8032	0.8129	0.0319			2	2	0	0	Oxidation (M)	M2:Oxidation (M):1000.00	5 5 38 2 0 0 0 0 0	TM(+15.99)LARLASA	Q6UVK1|CSPG4_HUMAN	DB Search	TMLARLASA	TMLARLASA	TMLARLASA
37	YPYPYPHTL	31.23	1149.55	9	55.6	9	8.2	575.787	2	39.8936	-1.3613	0.74	1969726	Neo_sh14_patient1_HLAI_0412_HM1114_tims_Slot1-36_1_3662.d	43762	0.9056	0.9153	-0.0104			1	1	0	0			5 4 4 14 14 0 0 0 0	YPYPYPHTL	Q9BZE1|RM37_HUMAN	DB Search	YPYPYPHTL	YPYPYPHTL
38	YLNDLIHSV	38.13	1072.56	9	66.7	9	4.1	537.287	2	48.4843	-0.6028	0.8	2391856	Neo_sh14_patient1_HLAI_0412_HM1114_tims_Slot1-36_1_3662.d	50956	0.8656	0.8753	0.0095	183	2960	2	2	1	1			5 37 39 39 5 5 0 0 0	YLNDLIHSV	O43572|AKA10_HUMAN	DB Search	YLNDLIHSV	YLNDLIHSV
39	YLQDKIYEV	37.49	1169.6	9	55.6	9	5.3	585.809	2	37.9238	-2.747	0.55	1872126	Neo_sh14_patient1_HLAI_0412_HM1114_tims_Slot1-36_1_3662.d	41634	0.89	0.8997	0.0451			2	2	0	0			0 0 33 23 18 25 0 0 5	YLQDKIYEV	Q8N8U2|CDYL2_HUMAN	DB Search	YLQDKIYEV	YLQDKIYEV
40	FADGHVLEL	27.36	999.503	9	88.9	9	-2	500.758	2	45.451	-0.5684	0.69	2246273	Neo_sh14_patient1_HLAI_0412_HM1114_tims_Slot1-36_1_3662.d	48581	0.8315	0.8412	0.0137	517	6920	1	1	1	1			5 25 0 12 18 57 57 30 5	FADGHVLEL	Q9Y2I1|NISCH_HUMAN	DB Search	FADGHVLEL	FADGHVLEL
41	FPNAIEHTL	52.47	1040.53	9	77.8	9	2.5	521.273	2	39.4871	1.0818	0.74	1952868	Neo_sh14_patient1_HLAI_0412_HM1114_tims_Slot1-36_1_3662.d	43428	0.8443	0.854	0.0109	238000	929000	12	12	2	2			5 97 49 22 22 26 22 1 1	FPNAIEHTL	P22314|UBA1_HUMAN	DB Search	FPNAIEHTL	FPNAIEHTL
42	KLM(+15.99)DHIYAV	26.01	1104.56	9	77.8	9	-0.5	553.289	2	23.6924	0.3283	0.84	1178489	Neo_sh14_patient1_HLAI_0412_HM1114_tims_Slot1-36_1_3662.d	29153	0.8606	0.8703	0.0446			2	2	0	0	Oxidation (M)	M3:Oxidation (M):1000.00	4 2 0 0 9 68 4 4 5	KLM(+15.99)DHIYAV	Q9UP83|COG5_HUMAN	DB Search	KLMDHIYAV	KLMDHIYAV
43	FAALHGPAL	32.67	895.492	9	100	9	-1	448.753	2	40.3104	1.4616	0.77	1990395	Neo_sh14_patient1_HLAI_0412_HM1114_tims_Slot1-36_1_3662.d	44235	0.78	0.7897	0.0252			2	2	0	0			5 69 22 22 7 4 3 3 5	FAALHGPAL	Q14166|TTL12_HUMAN	DB Search	FAALHGPAL	FAALHGPAL
44	YAASSYLSL	27.95	973.476	9	88.9	9	5.1	974.488	1	50.8329	-1.1794	0.7	2509187	Neo_sh14_patient1_HLAI_0412_HM1114_tims_Slot1-36_1_3662.d	52619	1.1503	1.1601	0.1148			1	1	0	0			5 4 4 11 11 0 42 44 5	YAASSYLSL	P0DOY2|IGLC2_HUMAN:A0M8Q6|IGLC7_HUMAN:P0DOY3|IGLC3_HUMAN:B9A064|IGLL5_HUMAN:P0CF74|IGLC6_HUMAN:P15814|IGLL1_HUMAN:P0DOX8|IGL1_HUMAN:P0CG04|IGLC1_HUMAN	DB Search	YAASSYLSL
45	YSLDHISSL	39.62	1033.51	9	77.8	9	-0.6	517.761	2	41.4841	-3.1058	0.79	2048502	Neo_sh14_patient1_HLAI_0412_HM1114_tims_Slot1-36_1_3662.d	45426	0.8385	0.8482	0.0067			3	3	0	0			5 17 17 23 15 34 24 0 0	YSLDHISSL	Q12769|NU160_HUMAN	DB Search	YSLDHISSL	YSLDHISSL
46	FPDEKIPTL	24.17	1058.56	9	55.6	9	2.6	530.291	2	47.9972	-0.3758	0.52	2365734	Neo_sh14_patient1_HLAI_0412_HM1114_tims_Slot1-36_1_3662.d	50538	0.8373	0.847	0.0278	650	4430	4	4	2	2			5 32 0 3 3 9 0 0 0	FPDEKIPTL	Q9NZC3|GDE1_HUMAN	DB Search	FPDEKIPTL	FPDEKIPTL
47	ILM(+15.99)EHIHKL	39.94	1148.64	9	77.8	9	3	575.328	2	18.5471	1.2808	0.76	915826	Neo_sh14_patient1_HLAI_0412_HM1114_tims_Slot1-36_1_3662.d	21694	0.9013	0.911	0.0339	13400	112000	3	3	1	1	Oxidation (M)	M3:Oxidation (M):1000.00	5 20 25 20 20 23 10 0 0	ILM(+15.99)EHIHKL	P84098|RL19_HUMAN	DB Search	ILMEHIHKL	ILMEHIHKL
48	KLDDYVYYV	22.53	1176.57	9	44.4	9	0.2	589.293	2	46.6317	-1.8844	0.6	2302310	Neo_sh14_patient1_HLAI_0412_HM1114_tims_Slot1-36_1_3662.d	49538	0.8966	0.9063	0.0285			1	1	0	0			0 0 0 16 18 18 77 0 0	KLDDYVYYV	Q8WU17|RN139_HUMAN	DB Search	KLDDYVYYV	KLDDYVYYV
49	YPDSHLPTL	42.04	1041.51	9	77.8	9	1.6	521.765	2	40.5755	-1.7064	0.8	2003523	Neo_sh14_patient1_HLAI_0412_HM1114_tims_Slot1-36_1_3662.d	44511	0.8125	0.8222	0.0326	5160	22500	5	5	1	1			5 17 6 6 5 61 6 0 0	YPDSHLPTL	Q5T5P2|SKT_HUMAN	DB Search	YPDSHLPTL	YPDSHLPTL
50	FPSTAEHTL	41.57	1001.48	9	77.8	9	11.1	501.754	2	24.5262	-4.95	0.8	1220258	Neo_sh14_patient1_HLAI_0412_HM1114_tims_Slot1-36_1_3662.d	30530	0.809	0.8187	0.0261	7220	100000	3	3	1	1			5 75 32 12 6 6 9 0 0	FPSTAEHTL	P41226|UBA7_HUMAN	DB Search	FPSTAEHTL	FPSTAEHTL
51	HPLEGTHEL	49.21	1031.5	9	77.8	9	4.8	516.762	2	16.0766	-1.1897	0.82	798508	Neo_sh14_patient1_HLAI_0412_HM1114_tims_Slot1-36_1_3662.d	18208	0.8516	0.8613	-0.0065	4850	51600	4	4	1	1			5 38 38 18 18 12 19 0 0	HPLEGTHEL	Q8IWR0|Z3H7A_HUMAN	DB Search	HPLEGTHEL	HPLEGTHEL
52	SFDETVTHF	39.32	1081.47	9	55.6	9	2.1	541.744	2	38.1132	-1.6648	0.82	1881514	Neo_sh14_patient1_HLAI_0412_HM1114_tims_Slot1-36_1_3662.d	41842	0.8152	0.8249	0.0499			2	2	0	0			1 1 22 17 5 5 2 0 0	SFDETVTHF	Q92547|TOPB1_HUMAN	DB Search	SFDETVTHF	SFDETVTHF
53	KVYTPSISK	38.78	1021.58	9	88.9	9	4.2	511.8	2	16.5646	2.1057	0.83	819265	Neo_sh14_patient1_HLAI_0412_HM1114_tims_Slot1-36_1_3662.d	18769	0.8206	0.8303	0.0445	385	5450	3	3	1	1			5 44 30 30 4 4 0 4 5	KVYTPSISK	Q5VV42|CDKAL_HUMAN	DB Search	KVYTPSISK	KVYTPSISK
54	TFDDIVHSF	27.52	1079.49	9	44.4	9	3.6	540.755	2	52.1574	-2.0259	0.81	2574157	Neo_sh14_patient1_HLAI_0412_HM1114_tims_Slot1-36_1_3662.d	53329	0.8474	0.8571	0.0178			1	1	0	0			5 13 21 13 0 0 0 0 0	TFDDIVHSF	P49327|FAS_HUMAN	DB Search	TFDDIVHSF	TFDDIVHSF
55	AVYSHVIQK	46.86	1043.58	9	55.6	9	1	522.796	2	15.8061	0.1633	0.77	781497	Neo_sh14_patient1_HLAI_0412_HM1114_tims_Slot1-36_1_3662.d	17721	0.8594	0.8691	0.0258	5630	66400	2	2	1	1			1 1 77 13 13 9 14 0 0	AVYSHVIQK	P20132|SDHL_HUMAN	DB Search	AVYSHVIQK	AVYSHVIQK
56	KVYNGILEK	46.54	1062.61	9	100	9	-1.6	532.31	2	18.3311	-0.2012	0.85	908270	Neo_sh14_patient1_HLAI_0412_HM1114_tims_Slot1-36_1_3662.d	21482	0.8675	0.8772	0.0176	2680	25500	1	1	1	1			5 61 27 20 6 8 42 28 5	KVYNGILEK	Q9P246|STIM2_HUMAN	DB Search	KVYNGILEK	KVYNGILEK
57	YLYDLNHTL	25.23	1150.57	9	66.7	9	1.9	576.291	2	46.6269	-0.9425	0.87	2300442	Neo_sh14_patient1_HLAI_0412_HM1114_tims_Slot1-36_1_3662.d	49506	0.8854	0.8951	0.0298	370	6940	2	2	1	1			5 8 50 23 23 11 0 0 0	YLYDLNHTL	Q9H1C4|UN93B_HUMAN	DB Search	YLYDLNHTL	YLYDLNHTL
58	IPNEIIHAL	42.61	1018.58	9	77.8	9	-1.1	510.297	2	47.0838	-1.1817	0.75	2319102	Neo_sh14_patient1_HLAI_0412_HM1114_tims_Slot1-36_1_3662.d	49806	0.8377	0.8474	0.0075	55300	526000	7	7	2	2			5 79 39 24 61 13 0 0 4	IPNEIIHAL	P52272|HNRPM_HUMAN	DB Search	IPNEIIHAL	IPNEIIHAL
59	KLYEKKLLK	27.51	1161.75	9	100	9	-0.1	581.881	2	11.1374	0.1349	0.6	550281	Neo_sh14_patient1_HLAI_0412_HM1114_tims_Slot1-36_1_3662.d	10497	0.9071	0.9168	0.048	602	11100	1	1	1	1			5 21 21 17 3 12 12 16 5	KLYEKKLLK	P42166|LAP2A_HUMAN:Q08999|RBL2_HUMAN:P42167|LAP2B_HUMAN	DB Search	KLYEKKLLK	KLYEKKLLK
60	YFDVSHEHL	42.95	1145.51	9	66.7	9	-0.1	573.764	2	31.8115	-1.808	0.88	1571807	Neo_sh14_patient1_HLAI_0412_HM1114_tims_Slot1-36_1_3662.d	35075	0.9036	0.9133	0.0015			2	2	0	0			5 31 31 31 11 11 0 0 0	YFDVSHEHL	P14735|IDE_HUMAN	DB Search	YFDVSHEHL	YFDVSHEHL
61	YLSDNVHLV	43.57	1058.54	9	66.7	9	4.2	530.279	2	39.5143	0.7985	0.93	1947207	Neo_sh14_patient1_HLAI_0412_HM1114_tims_Slot1-36_1_3662.d	43275	0.8695	0.8792	-0.0043	2140	25100	2	2	1	1			5 23 4 4 7 10 1 0 0	YLSDNVHLV	Q16543|CDC37_HUMAN	DB Search	YLSDNVHLV	YLSDNVHLV
62	KIYKKFLKK	22.55	1194.79	9	66.7	9	2.8	598.402	2	7.0141	-2.7853	0.58	345149	Neo_sh14_patient1_HLAI_0412_HM1114_tims_Slot1-36_1_3662.d	3653	0.9149	0.9246	0.0503			1	1	0	0			5 68 71 32 0 40 36 0 0	KIYKKFLKK	Q8WXH0|SYNE2_HUMAN	DB Search	KIYKKFLKK	KIYKKFLKK
63	SAAPRTVAL	25.65	884.508	9	88.9	9	0	443.261	2	22.3277	0.109	0.7	1110361	Neo_sh14_patient1_HLAI_0412_HM1114_tims_Slot1-36_1_3662.d	27121	0.7661	0.7757	0.0391			1	1	0	0			5 6 48 2 0 3 8 5 5	SAAPRTVAL	P04440|DPB1_HUMAN	DB Search	SAAPRTVAL	SAAPRTVAL
64	TPAPPTHAL	34.92	903.481	9	77.8	9	3.9	452.75	2	22.3246	-0.7448	0.88	1106600	Neo_sh14_patient1_HLAI_0412_HM1114_tims_Slot1-36_1_3662.d	27032	0.7777	0.7873	0.0075	1460	13700	3	3	1	1			5 8 28 27 2 2 2 0 0	TPAPPTHAL	Q5SXM2|SNPC4_HUMAN	DB Search	TPAPPTHAL	TPAPPTHAL
65	ALYPHVLVK	42.82	1038.62	9	77.8	9	-9.1	520.314	2	30.676	-7.1063	0.83	1515764	Neo_sh14_patient1_HLAI_0412_HM1114_tims_Slot1-36_1_3662.d	34112	0.8656	0.8753	0.0295			3	3	0	0			4 4 14 16 16 14 8 0 0	ALYPHVLVK	Q9BUJ2|HNRL1_HUMAN	DB Search	ALYPHVLVK	ALYPHVLVK
66	HFDDFVTNL	38.2	1106.5	9	77.8	9	1.7	554.26	2	50.8329	-2.551	0.82	2509193	Neo_sh14_patient1_HLAI_0412_HM1114_tims_Slot1-36_1_3662.d	52625	0.9001	0.9098	-0.015			3	3	0	0			0 0 2 8 48 44 14 3 3	HFDDFVTNL	P35610|SOAT1_HUMAN	DB Search	HFDDFVTNL	HFDDFVTNL
67	RIFNPHLNK	34.52	1137.64	9	66.7	9	0.6	569.828	2	15.4244	-0.0975	0.77	762599	Neo_sh14_patient1_HLAI_0412_HM1114_tims_Slot1-36_1_3662.d	17183	0.8811	0.8908	0.034	1010	11600	4	4	1	1			0 0 0 3 13 13 10 10 5	RIFNPHLNK	Q14135|VGLL4_HUMAN	DB Search	RIFNPHLNK	RIFNPHLNK
68	SLYPKLFQK	22.28	1122.64	9	66.7	9	2.4	562.331	2	36.0293	1.4005	0.89	1778142	Neo_sh14_patient1_HLAI_0412_HM1114_tims_Slot1-36_1_3662.d	39450	0.9044	0.9141	0.0208			1	1	0	0			4 4 17 21 15 5 0 0 0	SLYPKLFQK	Q9H6T3|RPAP3_HUMAN	DB Search	SLYPKLFQK	SLYPKLFQK
69	VAAPVVKEL	25.69	924.564	9	66.7	9	-1.4	463.289	2	34.9684	0.528	0.61	1725533	Neo_sh14_patient1_HLAI_0412_HM1114_tims_Slot1-36_1_3662.d	38249	0.7893	0.799	0.0259			1	1	0	0			3 3 51 26 17 17 0 0 0	VAAPVVKEL	C9JJ37|BTBDJ_HUMAN	DB Search	VAAPVVKEL
70	SFDAHLTEL	42.58	1031.49	9	88.9	9	-1	516.753	2	43.1497	-1.0532	0.71	2130657	Neo_sh14_patient1_HLAI_0412_HM1114_tims_Slot1-36_1_3662.d	46797	0.8358	0.8454	0.0094			3	3	0	0			5 5 16 16 0 23 23 50 5	SFDAHLTEL	O43865|SAHH2_HUMAN	DB Search	SFDAHLTEL	SFDAHLTEL
71	FPHHEFVAL	36.57	1095.55	9	77.8	9	3	548.784	2	37.0523	1.2784	0.84	1828910	Neo_sh14_patient1_HLAI_0412_HM1114_tims_Slot1-36_1_3662.d	40646	0.8664	0.8761	0.0188			1	1	0	0			3 3 0 0 22 97 67 18 5	FPHHEFVAL	Q9H3H5|GPT_HUMAN	DB Search	FPHHEFVAL
72	FPIHVQTSL	28.98	1040.57	9	66.7	9	2.9	521.292	2	46.5395	0.11	0.77	2294835	Neo_sh14_patient1_HLAI_0412_HM1114_tims_Slot1-36_1_3662.d	49407	0.8389	0.8485	0.0263	719	9420	1	1	1	1			5 0 0 1 69 69 68 8 5	FPIHVQTSL	Q9NVM4|ANM7_HUMAN	DB Search	FPIHVQTSL	FPIHVQTSL
73	HPADSPVIL	31.64	947.508	9	55.6	9	5.8	474.764	2	34.6649	-0.2896	0.87	1710528	Neo_sh14_patient1_HLAI_0412_HM1114_tims_Slot1-36_1_3662.d	37932	0.7885	0.7982	0.0567			2	2	0	0			0 0 0 0 11 11 11 18 5	HPADSPVIL	Q8N1F8|S11IP_HUMAN	DB Search	HPADSPVIL	HPADSPVIL
74	RLYGHWVKK	52.43	1185.68	9	55.6	9	2	396.234	3	10.5022	-0.6773	0.82	519810	Neo_sh14_patient1_HLAI_0412_HM1114_tims_Slot1-36_1_3662.d	9402	0.705	0.7146	0.0302			1	1	0	0			0 0 6 6 45 11 8 0 0	RLYGHWVKK	P15735|PHKG2_HUMAN	DB Search	RLYGHWVKK
75	RVYGGLTTK	43.78	993.561	9	100	9	2.9	497.789	2	12.5253	0.3996	0.94	618732	Neo_sh14_patient1_HLAI_0412_HM1114_tims_Slot1-36_1_3662.d	12852	0.8265	0.8361	0.0287	29300	370000	2	2	1	1			3 3 3 3 6 56 56 25 5	RVYGGLTTK	Q8WUM4|PDC6I_HUMAN	DB Search	RVYGGLTTK	RVYGGLTTK
76	VIYFPPLQK	27.95	1103.64	9	55.6	9	-6.4	552.823	2	49.6596	1.0721	0.88	2451472	Neo_sh14_patient1_HLAI_0412_HM1114_tims_Slot1-36_1_3662.d	51820	0.859	0.8687	0.0361			1	1	0	0			2 2 15 15 6 0 0 0 0	VIYFPPLQK	P98194|AT2C1_HUMAN	DB Search	VIYFPPLQK	VIYFPPLQK
77	FPVNKDVTL	34.88	1031.57	9	55.6	9	1.3	516.791	2	38.2268	-3.8752	0.8	1887162	Neo_sh14_patient1_HLAI_0412_HM1114_tims_Slot1-36_1_3662.d	41982	0.8451	0.8547	0.0201			1	1	0	0			5 78 52 4 0 0 43 0 0	FPVNKDVTL	Q14686|NCOA6_HUMAN	DB Search	FPVNKDVTL
78	HPSGATPTL	31.78	879.445	9	66.7	9	0.9	440.73	2	17.6961	-0.4291	0.91	877998	Neo_sh14_patient1_HLAI_0412_HM1114_tims_Slot1-36_1_3662.d	20586	0.7432	0.7529	0.0519	1280	13200	2	2	1	1			3 0 0 0 2 30 4 2 2	HPSGATPTL	Q8NFD5|ARI1B_HUMAN	DB Search	HPSGATPTL	HPSGATPTL
79	SVYDSVLQK	23.97	1037.54	9	44.4	9	3.6	519.779	2	29.2379	-3.5342	0.88	1444876	Neo_sh14_patient1_HLAI_0412_HM1114_tims_Slot1-36_1_3662.d	32992	0.8443	0.854	0.0209			2	2	0	0			0 0 70 26 5 5 1 0 0	SVYDSVLQK	Q8NF91|SYNE1_HUMAN	DB Search	SVYDSVLQK	SVYDSVLQK
80	ALMEAMHTV	27.45	1001.47	9	44.4	9	2.7	501.742	2	34.8545	-2.3478	0.74	1719914	Neo_sh14_patient1_HLAI_0412_HM1114_tims_Slot1-36_1_3662.d	38138	0.8106	0.8203	0.0346			1	1	0	0			0 0 25 25 28 34 0 0 0	ALMEAMHTV	Q68BL8|OLM2B_HUMAN	DB Search	ALMEAMHTV	ALMEAMHTV
81	HPTDDTTTL	23.09	999.451	9	77.8	9	1.4	500.733	2	14.6083	-2.17	0.89	721028	Neo_sh14_patient1_HLAI_0412_HM1114_tims_Slot1-36_1_3662.d	16004	0.8013	0.811	0.0339	23100	219000	5	5	1	1			0 0 4 4 5 54 54 12 5	HPTDDTTTL	Q96DB9|FXYD5_HUMAN	DB Search	HPTDDTTTL	HPTDDTTTL
82	KVIDRILYK	36.78	1146.71	9	88.9	9	3.8	574.366	2	21.5543	-1.2004	0.84	1070771	Neo_sh14_patient1_HLAI_0412_HM1114_tims_Slot1-36_1_3662.d	26087	0.8943	0.904	0.0408	314	6770	1	1	1	1			5 29 22 7 1 5 6 15 5	KVIDRILYK	O75533|SF3B1_HUMAN	DB Search	KVIDRILYK	KVIDRILYK
83	SLAELVHAV	24.97	937.523	9	66.7	9	-3.3	469.767	2	48.2967	-1.5755	0.77	2384390	Neo_sh14_patient1_HLAI_0412_HM1114_tims_Slot1-36_1_3662.d	50834	0.8114	0.821	0.0138			1	1	0	0			5 9 53 18 18 9 0 0 0	SLAELVHAV	Q9Y6P5|SESN1_HUMAN	DB Search	SLAELVHAV	SLAELVHAV
84	AVYTKMMTK	25.69	1071.55	9	44.4	9	3.5	536.782	2	16.7761	-1.3492	0.88	830613	Neo_sh14_patient1_HLAI_0412_HM1114_tims_Slot1-36_1_3662.d	19101	0.8675	0.8772	0.0276	4760	55300	2	2	1	1			1 1 55 36 19 4 0 0 0	AVYTKMMTK	P11413|G6PD_HUMAN	DB Search	AVYTKMMTK	AVYTKMMTK
85	ATYERVVYK	35.75	1127.6	9	66.7	9	-0.6	564.806	2	16.1145	-3.6278	0.62	800415	Neo_sh14_patient1_HLAI_0412_HM1114_tims_Slot1-36_1_3662.d	18279	0.8745	0.8842	0.0406			1	1	0	0			0 0 17 14 0 26 16 16 5	ATYERVVYK	O95059|RPP14_HUMAN	DB Search	ATYERVVYK	ATYERVVYK
86	M(+15.99)PDHTDVSL	16.21	1029.44	9	66.7	9	10	515.734	2	21.684	-1.3854	0.82	1078321	Neo_sh14_patient1_HLAI_0412_HM1114_tims_Slot1-36_1_3662.d	26293	0.804	0.8137	0.0412			1	1	0	0	Oxidation (M)	M1:Oxidation (M):1000.00	5 0 0 0 6 8 47 18 5	M(+15.99)PDHTDVSL	Q96FJ0|STALP_HUMAN	DB Search	MPDHTDVSL	MPDHTDVSL
87	RIYDYDPLYK	29.84	1344.67	10	50	10	6.8	673.348	2	34.551	-3.4095	0.85	1704878	Neo_sh14_patient1_HLAI_0412_HM1114_tims_Slot1-36_1_3662.d	37790	0.944	0.9537	0.0411			1	1	0	0			0 0 0 5 2 5 15 15 0 0	RIYDYDPLYK	P31941|ABC3A_HUMAN:Q9UH17|ABC3B_HUMAN	DB Search	RIYDYDPLYK	RIYDYDPLYK
88	RIYKNVMNK	42.02	1164.64	9	44.4	9	-0.5	389.222	3	9.441	0.2445	0.65	466746	Neo_sh14_patient1_HLAI_0412_HM1114_tims_Slot1-36_1_3662.d	7746	0.6957	0.7054	0.0295			3	3	0	0			0 0 0 44 50 44 9 0 0	RIYKNVMNK	O95573|ACSL3_HUMAN	DB Search	RIYKNVMNK	RIYKNVMNK
89	SAIGYIHSL	22.56	959.508	9	66.7	9	-0.7	480.761	2	40.3771	1.7943	0.9	1990402	Neo_sh14_patient1_HLAI_0412_HM1114_tims_Slot1-36_1_3662.d	44242	0.8381	0.8478	-0.0129	2260	30800	2	2	1	1			4 4 30 23 7 7 0 0 0	SAIGYIHSL	Q13042|CDC16_HUMAN	DB Search	SAIGYIHSL	SAIGYIHSL
90	FIAPTGHSL	41.78	941.497	9	66.7	9	4	471.758	2	33.5046	-0.4568	0.91	1652345	Neo_sh14_patient1_HLAI_0412_HM1114_tims_Slot1-36_1_3662.d	36665	0.8036	0.8133	0.0216	23600	203000	4	4	1	1			5 10 99 21 17 9 0 0 0	FIAPTGHSL	Q9NVA2|SEP11_HUMAN:Q14141|SEPT6_HUMAN	DB Search	FIAPTGHSL	FIAPTGHSL
91	AAVDRTTEL	31.77	974.503	9	88.9	9	3.2	488.26	2	18.2186	-1.5557	0.9	902632	Neo_sh14_patient1_HLAI_0412_HM1114_tims_Slot1-36_1_3662.d	21352	0.7955	0.8052	0.0397	257	6270	1	1	1	1			5 40 76 15 0 5 5 22 5	AAVDRTTEL	Q8TD16|BICD2_HUMAN	DB Search	AAVDRTTEL	AAVDRTTEL
92	TLADLVHHV	42.6	1003.54	9	88.9	9	0.8	502.78	2	38.1601	-2.6908	0.94	1883389	Neo_sh14_patient1_HLAI_0412_HM1114_tims_Slot1-36_1_3662.d	41881	0.8641	0.8737	-0.0189	13000	121000	2	2	1	1			5 6 29 18 18 22 15 1 2	TLADLVHHV	Q9Y4A5|TRRAP_HUMAN	DB Search	TLADLVHHV	TLADLVHHV
93	TPSEPHPVL	40.82	975.503	9	66.7	9	0.3	488.759	2	24.2229	2.1487	0.79	1205001	Neo_sh14_patient1_HLAI_0412_HM1114_tims_Slot1-36_1_3662.d	29961	0.8059	0.8156	0.0092	8690	84200	4	4	1	1			5 55 12 12 19 17 0 0 0	TPSEPHPVL	Q9Y5A9|YTHD2_HUMAN	DB Search	TPSEPHPVL	TPSEPHPVL
94	VFDTAIAHL	35.95	985.523	9	77.8	9	5	493.771	2	47.3128	-1.0602	0.86	2335915	Neo_sh14_patient1_HLAI_0412_HM1114_tims_Slot1-36_1_3662.d	50095	0.8241	0.8338	0.021			1	1	0	0			5 33 19 7 7 18 18 0 0	VFDTAIAHL	O43255|SIAH2_HUMAN	DB Search	VFDTAIAHL	VFDTAIAHL
95	FAEGFVRAL	38.44	1008.54	9	66.7	9	0.1	505.277	2	48.0171	2.3325	0.93	2367598	Neo_sh14_patient1_HLAI_0412_HM1114_tims_Slot1-36_1_3662.d	50566	0.8369	0.8466	0.0182	1210	14400	1	1	1	1			5 71 69 14 13 5 0 0 0	FAEGFVRAL	P05412|JUN_HUMAN	DB Search	FAEGFVRAL	FAEGFVRAL
96	KLAEVILKK	20.65	1040.7	9	77.8	9	5.8	521.358	2	18.1983	-0.0205	0.82	904495	Neo_sh14_patient1_HLAI_0412_HM1114_tims_Slot1-36_1_3662.d	21379	0.8586	0.8683	0.0265			1	1	0	0			5 64 7 0 0 10 17 12 5	KLAEVILKK	Q8WUI4|HDAC7_HUMAN	DB Search	KLAEVILKK	KLAEVILKK
97	KLYLPVQNK	41.49	1101.65	9	66.7	9	3.5	551.836	2	23.7303	2.4242	0.8	1180382	Neo_sh14_patient1_HLAI_0412_HM1114_tims_Slot1-36_1_3662.d	29210	0.8683	0.878	0.0368			2	2	0	0			5 6 15 15 5 1 2 0 0	KLYLPVQNK	Q9Y6A4|CFA20_HUMAN	DB Search	KLYLPVQNK	KLYLPVQNK
98	SPAPTDHSL	27.93	923.435	9	44.4	9	4.2	462.727	2	16.3038	-1.5424	0.79	809847	Neo_sh14_patient1_HLAI_0412_HM1114_tims_Slot1-36_1_3662.d	18531	0.7819	0.7916	0.0132			1	1	0	0			0 0 24 11 11 2 0 0 0	SPAPTDHSL	Q6N022|TEN4_HUMAN	DB Search	SPAPTDHSL	SPAPTDHSL
99	TFDGHGVFF	28.45	1025.46	9	55.6	9	1.6	513.738	2	49.4702	-0.4378	0.77	2442161	Neo_sh14_patient1_HLAI_0412_HM1114_tims_Slot1-36_1_3662.d	51689	0.8187	0.8284	0.0164			1	1	0	0			5 21 6 0 0 10 44 0 0	TFDGHGVFF	Q96SQ9|CP2S1_HUMAN	DB Search	TFDGHGVFF
100	AIYEPKTFK	44.46	1095.6	9	66.7	9	3.2	548.807	2	21.5191	-6.5678	0.9	1066980	Neo_sh14_patient1_HLAI_0412_HM1114_tims_Slot1-36_1_3662.d	25968	0.861	0.8706	0.0442	17900	136000	4	4	2	2			5 16 23 23 14 5 1 0 0	AIYEPKTFK	Q9BYC9|RM20_HUMAN	DB Search	AIYEPKTFK	AIYEPKTFK
101	KLFNKFIGK	37.47	1093.66	9	100	9	6	547.843	2	22.4141	0.6892	0.72	1114131	Neo_sh14_patient1_HLAI_0412_HM1114_tims_Slot1-36_1_3662.d	27219	0.8598	0.8695	0.0354	718	7900	2	2	1	1			5 85 23 12 4 14 4 4 5	KLFNKFIGK	P48200|IREB2_HUMAN	DB Search	KLFNKFIGK	KLFNKFIGK
102	RVFTGVVTK	26.5	1005.6	9	44.4	9	-2.1	503.805	2	17.6925	0.0613	0.94	876099	Neo_sh14_patient1_HLAI_0412_HM1114_tims_Slot1-36_1_3662.d	20523	0.8327	0.8423	0.0325	1760	21800	1	1	1	1			1 0 0 0 0 53 72 18 5	RVFTGVVTK	Q8IX12|CCAR1_HUMAN	DB Search	RVFTGVVTK	RVFTGVVTK
103	VLDDKLVFV	39.91	1046.6	9	77.8	9	3.5	524.31	2	53.6336	0.9163	0.73	2646731	Neo_sh14_patient1_HLAI_0412_HM1114_tims_Slot1-36_1_3662.d	54299	0.8555	0.8652	0.0296			3	3	0	0			5 13 4 4 8 73 42 0 0	VLDDKLVFV	Q4KMQ2|ANO6_HUMAN	DB Search	VLDDKLVFV	VLDDKLVFV
104	KFDDGAVFL	36.06	1010.51	9	55.6	9	5.7	506.264	2	47.7966	-2.1471	0.93	2356413	Neo_sh14_patient1_HLAI_0412_HM1114_tims_Slot1-36_1_3662.d	50397	0.8222	0.8319	0.033	1410	13800	2	2	1	1			0 0 5 0 0 5 79 20 5	KFDDGAVFL	O14974|MYPT1_HUMAN	DB Search	KFDDGAVFL	KFDDGAVFL
105	KLFNGTFLK	41.92	1066.62	9	77.8	9	18.2	534.326	2	35.9914	2.5197	0.89	1776272	Neo_sh14_patient1_HLAI_0412_HM1114_tims_Slot1-36_1_3662.d	39416	0.8567	0.8664	0.0385			1	1	0	0			5 60 48 33 0 0 10 21 5	KLFNGTFLK	P86791|CCZ1_HUMAN:P86790|CCZ1B_HUMAN	DB Search	KLFNGTFLK	KLFNGTFLK
106	KLAEHFLAK	47.32	1055.61	9	100	9	2.9	528.815	2	16.4851	1.3599	0.79	817363	Neo_sh14_patient1_HLAI_0412_HM1114_tims_Slot1-36_1_3662.d	18703	0.8656	0.8753	0.0195	242	4370	1	1	1	1			5 99 56 47 35 42 15 4 4	KLAEHFLAK	P0DJJ0|SRG2C_HUMAN	DB Search	KLAEHFLAK	KLAEHFLAK
107	KMNEKLYTV	32.36	1124.59	9	77.8	9	9	563.307	2	20.8601	0.7641	0.75	1034877	Neo_sh14_patient1_HLAI_0412_HM1114_tims_Slot1-36_1_3662.d	25077	0.8656	0.8753	0.0395	243	4430	1	1	1	1			5 19 0 0 25 37 41 34 5	KMNEKLYTV	Q9NTI5|PDS5B_HUMAN	DB Search	KMNEKLYTV	KMNEKLYTV
108	RIYDIFRSK	45.48	1196.67	9	55.6	9	0.6	399.896	3	24.6021	-4.8255	0.88	1224089	Neo_sh14_patient1_HLAI_0412_HM1114_tims_Slot1-36_1_3662.d	30689	0.7073	0.717	0.0179			1	1	0	0			0 0 6 20 28 7 4 0 0	RIYDIFRSK	Q01432|AMPD3_HUMAN	DB Search	RIYDIFRSK	RIYDIFRSK
109	SPHPHSVVL	31.17	971.519	9	66.7	9	5.6	486.769	2	16.6827	0.489	0.61	828721	Neo_sh14_patient1_HLAI_0412_HM1114_tims_Slot1-36_1_3662.d	19045	0.787	0.7966	0.0382			1	1	0	0			4 0 0 6 0 8 46 3 3	SPHPHSVVL	P49753|ACOT2_HUMAN	DB Search	SPHPHSVVL	SPHPHSVVL
110	TPYEYPYTL	30.17	1145.53	9	44.4	9	0.7	573.772	2	50.4923	-2.3304	0.8	2492463	Neo_sh14_patient1_HLAI_0412_HM1114_tims_Slot1-36_1_3662.d	52419	0.8683	0.878	0.0268			2	2	0	0			0 0 0 21 52 52 9 0 0	TPYEYPYTL	Q96PU8|QKI_HUMAN	DB Search	TPYEYPYTL	TPYEYPYTL
111	KLLPSVVLK	38.35	995.674	9	88.9	9	-1.8	498.844	2	36.7866	0.1193	0.85	1815698	Neo_sh14_patient1_HLAI_0412_HM1114_tims_Slot1-36_1_3662.d	40286	0.8617	0.8714	0.0134			2	2	0	0			5 30 36 6 0 9 17 2 2	KLLPSVVLK	Q99075|HBEGF_HUMAN	DB Search	KLLPSVVLK	KLLPSVVLK
112	SAHTHTLSL	38.32	965.493	9	77.8	9	6	483.757	2	16.0777	0.8599	0.76	796611	Neo_sh14_patient1_HLAI_0412_HM1114_tims_Slot1-36_1_3662.d	18147	0.8245	0.8342	-0.0094	617	10700	2	2	1	1			0 0 6 9 9 76 23 6 5	SAHTHTLSL	P55268|LAMB2_HUMAN	DB Search	SAHTHTLSL	SAHTHTLSL
113	HVYTPSTTK	51.65	1032.52	9	77.8	9	4.8	517.272	2	9.3814	-0.0663	0.73	459121	Neo_sh14_patient1_HLAI_0412_HM1114_tims_Slot1-36_1_3662.d	7465	0.8582	0.8679	0.0069	2270	25100	2	2	1	1			5 35 35 35 17 6 2 0 0	HVYTPSTTK	Q9H9E1|ANRA2_HUMAN	DB Search	HVYTPSTTK	HVYTPSTTK
114	KSYPSLTTK	43.87	1023.56	9	66.7	9	0.8	512.788	2	13.6898	-0.4264	0.85	679366	Neo_sh14_patient1_HLAI_0412_HM1114_tims_Slot1-36_1_3662.d	14734	0.8358	0.8454	0.0294			1	1	0	0			5 58 68 16 0 2 1 1 5	KSYPSLTTK	Q15029|U5S1_HUMAN	DB Search	KSYPSLTTK	KSYPSLTTK
115	M(+15.99)FDIVGTHL	34.8	1047.51	9	55.6	9	-1.3	524.76	2	48.3345	0.0331	0.86	2386255	Neo_sh14_patient1_HLAI_0412_HM1114_tims_Slot1-36_1_3662.d	50863	0.8582	0.8679	-0.0031			1	1	0	0	Oxidation (M)	M1:Oxidation (M):1000.00	5 31 39 39 24 0 0 0 0	M(+15.99)FDIVGTHL	O75618|DEDD_HUMAN	DB Search	MFDIVGTHL	MFDIVGTHL
116	RLFEHPLYR	40.85	1229.67	9	55.6	9	-10	410.892	3	22.3277	1.7549	0.86	1110371	Neo_sh14_patient1_HLAI_0412_HM1114_tims_Slot1-36_1_3662.d	27131	0.732	0.7417	0.0531	825	10800	4	4	1	1			0 0 2 2 45 37 9 0 0	RLFEHPLYR	Q8IXL6|FA20C_HUMAN	DB Search	RLFEHPLYR	RLFEHPLYR
117	RLKPTFISK	29.96	1088.67	9	44.4	9	7.5	363.9	3	16.1523	0.4187	0.72	802286	Neo_sh14_patient1_HLAI_0412_HM1114_tims_Slot1-36_1_3662.d	18314	0.7131	0.7227	0.0221			2	2	0	0			0 0 6 22 32 32 0 0 0	RLKPTFISK	Q9UJA2|CRLS1_HUMAN	DB Search	RLKPTFISK	RLKPTFISK
118	RLNHYVLYK	37.63	1204.67	9	66.7	9	7.7	603.348	2	17.1191	1.2335	0.86	847675	Neo_sh14_patient1_HLAI_0412_HM1114_tims_Slot1-36_1_3662.d	19639	0.9056	0.9153	0.0496	236	5740	5	5	1	1			0 0 0 6 91 77 77 19 5	RLNHYVLYK	O43242|PSMD3_HUMAN	DB Search	RLNHYVLYK	RLNHYVLYK
119	VLM(+15.99)ENIVYL	26.71	1108.58	9	44.4	9	2.2	555.3	2	54.3922	-2.7365	0.88	2684396	Neo_sh14_patient1_HLAI_0412_HM1114_tims_Slot1-36_1_3662.d	55244	0.8753	0.885	0.0199			1	1	0	0	Oxidation (M)	M3:Oxidation (M):1000.00	0 0 0 8 20 83 6 0 0	VLM(+15.99)ENIVYL	Q9P2J5|SYLC_HUMAN	DB Search	VLMENIVYL	VLMENIVYL
120	KLQEQIFHL	34.8	1154.64	9	66.7	9	0.1	578.33	2	40.3863	1.3605	0.68	1994152	Neo_sh14_patient1_HLAI_0412_HM1114_tims_Slot1-36_1_3662.d	44320	0.9028	0.9125	0.0223			1	1	0	0			5 69 26 0 35 49 45 0 0	KLQEQIFHL	Q9NQC1|JADE2_HUMAN	DB Search	KLQEQIFHL	KLQEQIFHL
121	KVYVQVTKK	25.3	1091.67	9	77.8	9	-7.2	546.838	2	9.0238	-0.851	0.73	445880	Neo_sh14_patient1_HLAI_0412_HM1114_tims_Slot1-36_1_3662.d	7076	0.8749	0.8846	0.0302			1	1	0	0			5 7 7 7 4 4 0 0 4	KVYVQVTKK	Q5THJ4|VP13D_HUMAN	DB Search	KVYVQVTKK	KVYVQVTKK
122	LYDHTTILF	27.6	1121.58	9	66.7	9	2.9	561.797	2	51.7789	0.8693	0.73	2555569	Neo_sh14_patient1_HLAI_0412_HM1114_tims_Slot1-36_1_3662.d	53101	0.8893	0.899	0.0059			1	1	0	0			5 0 0 0 12 51 37 6 5	LYDHTTILF	Q9BUU2|MET22_HUMAN	DB Search	LYDHTTILF	LYDHTTILF
123	RFDEAYIYM	35.63	1206.54	9	66.7	9	4.5	604.279	2	46.7831	-1.8044	0.95	2309760	Neo_sh14_patient1_HLAI_0412_HM1114_tims_Slot1-36_1_3662.d	49644	0.9048	0.9145	0.0204			1	1	0	0			0 0 0 6 7 32 83 10 5	RFDEAYIYM	Q6DKK2|TTC19_HUMAN	DB Search	RFDEAYIYM	RFDEAYIYM
124	RLLDYVATV	19.39	1048.59	9	55.6	9	8.2	525.307	2	47.6155	-0.3971	0.87	2350822	Neo_sh14_patient1_HLAI_0412_HM1114_tims_Slot1-36_1_3662.d	50314	0.8389	0.8485	0.0463			1	1	0	0			0 0 0 0 55 95 92 10 5	RLLDYVATV	Q9NR09|BIRC6_HUMAN	DB Search	RLLDYVATV	RLLDYVATV
125	RVTPFILKK	41.3	1100.71	9	55.6	9	10.4	367.913	3	21.3431	-0.2338	0.7	1061324	Neo_sh14_patient1_HLAI_0412_HM1114_tims_Slot1-36_1_3662.d	25820	0.6664	0.676	0.0588	3360	37700	7	7	2	2			0 0 3 7 29 24 4 0 0	RVTPFILKK	Q8N4H5|TOM5_HUMAN	DB Search	RVTPFILKK	RVTPFILKK
126	SAHSHFISL	31.98	997.498	9	55.6	9	-8.8	499.752	2	24.4123	1.3429	0.83	1214467	Neo_sh14_patient1_HLAI_0412_HM1114_tims_Slot1-36_1_3662.d	30247	0.8253	0.835	0.0099			1	1	0	0			0 0 0 0 22 55 37 5 5	SAHSHFISL	Q68CP9|ARID2_HUMAN	DB Search	SAHSHFISL	SAHSHFISL
127	VAIPTFRQL	34.52	1043.61	9	66.7	9	-4.7	522.811	2	50.1517	1.8503	0.96	2475692	Neo_sh14_patient1_HLAI_0412_HM1114_tims_Slot1-36_1_3662.d	52172	0.8156	0.8253	0.0595	4820	37500	6	6	1	1			2 2 7 20 9 1 0 0 2	VAIPTFRQL	P12111|CO6A3_HUMAN	DB Search	VAIPTFRQL	VAIPTFRQL
128	VFDKTLAEL	34.14	1034.56	9	100	9	1.2	518.29	2	44.814	-0.9961	0.77	2214528	Neo_sh14_patient1_HLAI_0412_HM1114_tims_Slot1-36_1_3662.d	48048	0.8323	0.842	0.0429	4830	53900	3	3	1	1			5 85 6 15 17 18 38 38 5	VFDKTLAEL	Q6VMQ6|MCAF1_HUMAN	DB Search	VFDKTLAEL	VFDKTLAEL
129	YFDLQTHVI	44.55	1134.57	9	55.6	9	4.5	568.295	2	49.8868	-0.6651	0.44	2462668	Neo_sh14_patient1_HLAI_0412_HM1114_tims_Slot1-36_1_3662.d	52000	0.8869	0.8966	0.0182			1	1	0	0			5 29 26 26 0 19 0 0 0	YFDLQTHVI	Q8WUB8|PHF10_HUMAN	DB Search	YFDLQTHVI	YFDLQTHVI
130	ALYKWLLKK	37.06	1161.73	9	55.6	9	7.8	581.875	2	30.2974	-1.863	0.68	1497099	Neo_sh14_patient1_HLAI_0412_HM1114_tims_Slot1-36_1_3662.d	33807	0.904	0.9137	0.0511			3	3	0	0			0 0 19 19 52 17 10 0 0	ALYKWLLKK	Q13772|NCOA4_HUMAN	DB Search	ALYKWLLKK	ALYKWLLKK
131	KTLPYPLKK	41.81	1086.68	9	100	9	4.1	544.35	2	17.0236	-0.5466	0.75	845816	Neo_sh14_patient1_HLAI_0412_HM1114_tims_Slot1-36_1_3662.d	19616	0.8776	0.8873	0.0275	1750	12500	3	3	1	1			5 12 12 23 23 7 6 8 5	KTLPYPLKK	O75626|PRDM1_HUMAN	DB Search	KTLPYPLKK	KTLPYPLKK
132	TLADVLYHV	38.91	1029.55	9	55.6	9	-3.3	515.78	2	53.4443	-3.1397	0.75	2637366	Neo_sh14_patient1_HLAI_0412_HM1114_tims_Slot1-36_1_3662.d	54114	0.866	0.8757	-0.0008			1	1	0	0			1 1 13 11 11 45 16 0 0	TLADVLYHV	Q9UBL3|ASH2L_HUMAN	DB Search	TLADVLYHV	TLADVLYHV
133	FITPTGHSL	33.33	971.508	9	44.4	9	-16.4	486.753	2	34.8165	0.9523	0.83	1718016	Neo_sh14_patient1_HLAI_0412_HM1114_tims_Slot1-36_1_3662.d	38076	0.8125	0.8222	0.0126			2	2	0	0			0 0 59 12 11 5 0 0 0	FITPTGHSL	Q92599|SEPT8_HUMAN	DB Search	FITPTGHSL	FITPTGHSL
134	HYDGSYSTF	15.45	1075.42	9	55.6	9	1.6	538.72	2	23.5029	-2.7915	0.67	1169096	Neo_sh14_patient1_HLAI_0412_HM1114_tims_Slot1-36_1_3662.d	28940	0.8253	0.835	0.0399			1	1	0	0			0 0 11 8 8 52 9 0 0	HYDGSYSTF	P01023|A2MG_HUMAN	DB Search	HYDGSYSTF	HYDGSYSTF
135	RLNTGILNK	39.67	1027.61	9	66.7	9	6.8	514.818	2	18.5394	-0.2775	0.84	921536	Neo_sh14_patient1_HLAI_0412_HM1114_tims_Slot1-36_1_3662.d	21896	0.8482	0.8578	0.037			1	1	0	0			0 0 0 3 3 34 55 6 5	RLNTGILNK	P11387|TOP1_HUMAN	DB Search	RLNTGILNK	RLNTGILNK
136	RTFSKTIVK	32.35	1078.65	9	55.6	9	2.9	360.558	3	10.5779	0.5269	0.6	523614	Neo_sh14_patient1_HLAI_0412_HM1114_tims_Slot1-36_1_3662.d	9534	0.6795	0.6891	0.0457			4	4	0	0			0 0 5 20 78 78 4 0 0	RTFSKTIVK	Q86WG5|MTMRD_HUMAN	DB Search	RTFSKTIVK	RTFSKTIVK
137	SAIGYLHSL	22.56	959.508	9	66.7	9	-0.7	480.761	2	40.3771	-0.1138	0.88	1990402	Neo_sh14_patient1_HLAI_0412_HM1114_tims_Slot1-36_1_3662.d	44242	0.8381	0.8478	-0.0129	2260	30800	2	2	1	1			4 4 30 23 7 7 0 0 0	SAIGYLHSL	Q9HBY8|SGK2_HUMAN	DB Search	SAIGYLHSL	SAIGYLHSL
138	AAAYPHTSL	24.78	929.461	9	44.4	9	-3.1	465.736	2	21.9492	0.7038	0.69	1091535	Neo_sh14_patient1_HLAI_0412_HM1114_tims_Slot1-36_1_3662.d	26655	0.8098	0.8195	0.0054			4	4	0	0			5 13 13 35 0 0 0 0 0	AAAYPHTSL	Q9P2R6|RERE_HUMAN	DB Search	AAAYPHTSL	AAAYPHTSL
139	KFDDIRIYF	30.48	1215.63	9	55.6	9	-4.4	608.819	2	52.2709	2.8628	0.78	2579726	Neo_sh14_patient1_HLAI_0412_HM1114_tims_Slot1-36_1_3662.d	53390	0.9145	0.9242	0.0307			2	2	0	0			5 62 22 22 3 0 0 0 0	KFDDIRIYF	Q9P2E3|ZNFX1_HUMAN	DB Search	KFDDIRIYF	KFDDIRIYF
140	RAYPHVFTK	55.74	1117.6	9	77.8	9	3.2	559.811	2	15.0059	1.013	0.87	743726	Neo_sh14_patient1_HLAI_0412_HM1114_tims_Slot1-36_1_3662.d	16670	0.8881	0.8978	0.0171	7150	60200	3	3	1	1			2 0 0 23 25 60 18 18 5	RAYPHVFTK	O14949|QCR8_HUMAN	DB Search	RAYPHVFTK	RAYPHVFTK
141	FIWENIHTL	25.47	1171.6	9	44.4	9	-1.7	586.808	2	54.1268	-3.2263	0.73	2671230	Neo_sh14_patient1_HLAI_0412_HM1114_tims_Slot1-36_1_3662.d	54930	0.9021	0.9118	0.0131			1	1	0	0			5 14 69 0 0 0 30 0 0	FIWENIHTL	Q03001|DYST_HUMAN	DB Search	FIWENIHTL	FIWENIHTL
142	FPEHIFPAL	45.2	1069.56	9	88.9	9	-1.4	535.786	2	54.3202	-2.5202	0.88	2680623	Neo_sh14_patient1_HLAI_0412_HM1114_tims_Slot1-36_1_3662.d	55143	0.8482	0.8578	0.017	12700	296000	2	2	1	1			3 3 0 3 35 71 7 7 5	FPEHIFPAL	P61160|ARP2_HUMAN	DB Search	FPEHIFPAL	FPEHIFPAL
143	MPETTETVL	29.09	1019.48	9	77.8	9	-1	1020.49	1	39.9694	-4.0593	0.66	1973468	Neo_sh14_patient1_HLAI_0412_HM1114_tims_Slot1-36_1_3662.d	43832	1.1831	1.1929	0.112	1150	10700	2	2	1	1			5 0 0 9 8 8 39 79 5	MPETTETVL	P20036|DPA1_HUMAN	DB Search	MPETTETVL	MPETTETVL
144	HAIEESVVL	31.3	995.529	9	66.7	9	6.1	498.775	2	36.1429	0.8214	0.89	1783776	Neo_sh14_patient1_HLAI_0412_HM1114_tims_Slot1-36_1_3662.d	39576	0.8094	0.8191	0.0457			2	2	0	0			0 0 0 5 5 50 77 16 5	HAIEESVVL	O15372|EIF3H_HUMAN	DB Search	HAIEESVVL	HAIEESVVL
145	SVASPFTSK	33.01	922.476	9	44.4	9	4.6	462.247	2	21.3809	-0.8378	0.83	1063220	Neo_sh14_patient1_HLAI_0412_HM1114_tims_Slot1-36_1_3662.d	25880	0.7529	0.7626	0.0423			2	2	0	0			0 0 23 23 4 3 1 0 0	SVASPFTSK	Q9H7F0|AT133_HUMAN:Q4VNC0|AT135_HUMAN:Q4VNC1|AT134_HUMAN	DB Search	SVASPFTSK	SVASPFTSK
146	ALYWPLNQK	30.47	1131.61	9	44.4	9	-2.6	566.81	2	47.3646	-0.9368	0.94	2337780	Neo_sh14_patient1_HLAI_0412_HM1114_tims_Slot1-36_1_3662.d	50124	0.873	0.8827	0.0422	135	2750	1	1	1	1			0 0 12 27 6 6 1 0 0	ALYWPLNQK	Q99542|MMP19_HUMAN	DB Search	ALYWPLNQK	ALYWPLNQK
147	RVGPTILNK	26.06	996.608	9	44.4	9	6	499.314	2	18.5466	1.0981	0.85	919642	Neo_sh14_patient1_HLAI_0412_HM1114_tims_Slot1-36_1_3662.d	21838	0.8187	0.8284	0.0364	572	9280	2	2	1	1			0 0 0 0 0 38 59 37 5	RVGPTILNK	Q8NFG4|FLCN_HUMAN	DB Search	RVGPTILNK	RVGPTILNK
148	SAYEFYHAL	22.94	1099.5	9	44.4	9	-9.7	550.751	2	42.7713	-2.2845	0.77	2112037	Neo_sh14_patient1_HLAI_0412_HM1114_tims_Slot1-36_1_3662.d	46537	0.8734	0.8831	0.0118			1	1	0	0			0 0 63 97 59 45 0 0 0	SAYEFYHAL	Q99814|EPAS1_HUMAN	DB Search	SAYEFYHAL	SAYEFYHAL
149	KTYGEIFEK	50.16	1113.57	9	100	9	1.3	557.793	2	21.3802	0.6524	0.88	1059427	Neo_sh14_patient1_HLAI_0412_HM1114_tims_Slot1-36_1_3662.d	25759	0.8776	0.8873	0.0175	52100	470000	4	4	1	1			5 87 66 31 28 28 10 10 5	KTYGEIFEK	O95298|NDUC2_HUMAN	DB Search	KTYGEIFEK	KTYGEIFEK
150	NPASHSYVL	25.81	986.482	9	44.4	9	4.5	494.251	2	22.9343	-12.7946	0.56	1140658	Neo_sh14_patient1_HLAI_0412_HM1114_tims_Slot1-36_1_3662.d	28042	0.8191	0.8288	0.0161			2	2	0	0			5 0 0 0 2 44 52 0 0	NPASHSYVL	P13995|MTDC_HUMAN	DB Search	NPASHSYVL	NPASHSYVL
151	KLLDPIREK	29.39	1110.68	9	44.4	9	-1.7	371.232	3	18.3878	-0.8761	0.93	913935	Neo_sh14_patient1_HLAI_0412_HM1114_tims_Slot1-36_1_3662.d	21639	0.7077	0.7173	0.0175	746	10100	2	2	1	1			0 0 10 39 32 25 0 0 0	KLLDPIREK	P54577|SYYC_HUMAN	DB Search	KLLDPIREK	KLLDPIREK
152	ALATLIHQV	25.83	964.571	9	44.4	9	1.5	483.293	2	41.8745	-2.2415	0.89	2065403	Neo_sh14_patient1_HLAI_0412_HM1114_tims_Slot1-36_1_3662.d	45803	0.8323	0.842	0.0129	1770	23900	2	2	1	1			0 0 56 30 29 29 0 0 0	ALATLIHQV	Q9UBW8|CSN7A_HUMAN	DB Search	ALATLIHQV	ALATLIHQV
153	HPQGFEVAL	29.6	996.503	9	77.8	9	4.4	499.261	2	41.4084	0.0198	0.93	2044749	Neo_sh14_patient1_HLAI_0412_HM1114_tims_Slot1-36_1_3662.d	45345	0.8086	0.8183	0.0465			1	1	0	0			0 0 3 3 10 21 37 21 5	HPQGFEVAL	Q14656|TM187_HUMAN	DB Search	HPQGFEVAL	HPQGFEVAL
154	SVYGYGVQK	36.89	999.503	9	55.6	9	-4	500.757	2	19.4999	-0.6606	0.93	966884	Neo_sh14_patient1_HLAI_0412_HM1114_tims_Slot1-36_1_3662.d	23180	0.8315	0.8412	0.0137	978	17100	1	1	1	1			0 0 60 16 16 4 4 0 0	SVYGYGVQK	Q96I24|FUBP3_HUMAN	DB Search	SVYGYGVQK	SVYGYGVQK
155	KFDPMGKYF	33.53	1131.54	9	55.6	9	10	566.784	2	39.8936	-0.1508	0.72	1969728	Neo_sh14_patient1_HLAI_0412_HM1114_tims_Slot1-36_1_3662.d	43764	0.8668	0.8765	0.0384			1	1	0	0			5 12 12 0 0 8 21 0 0	KFDPMGKYF	Q96J01|THOC3_HUMAN	DB Search	KFDPMGKYF	KFDPMGKYF
156	KVYTHNLYY	27.64	1199.6	9	77.8	9	3.2	600.808	2	21.2059	-0.191	0.61	1051863	Neo_sh14_patient1_HLAI_0412_HM1114_tims_Slot1-36_1_3662.d	25539	0.9102	0.9199	0.0349	617	6450	1	1	1	1			5 21 19 0 0 88 45 31 5	KVYTHNLYY	Q96EK5|KBP_HUMAN	DB Search	KVYTHNLYY	KVYTHNLYY
157	TPNHVEHTL	61.51	1046.51	9	100	9	3.4	524.266	2	11.4894	1.8909	0.74	567379	Neo_sh14_patient1_HLAI_0412_HM1114_tims_Slot1-36_1_3662.d	11071	0.8307	0.8404	0.0144	61200	866000	4	4	1	1			5 54 54 34 23 23 93 41 5	TPNHVEHTL	Q9HBL0|TENS1_HUMAN	DB Search	TPNHVEHTL	TPNHVEHTL
158	KVLFPLLTK	32.84	1057.69	9	88.9	9	0.5	529.852	2	46.4047	1.1388	0.85	2291106	Neo_sh14_patient1_HLAI_0412_HM1114_tims_Slot1-36_1_3662.d	49350	0.8551	0.8648	0.04			1	1	0	0			5 17 65 65 10 9 2 0 4	KVLFPLLTK	Q92538|GBF1_HUMAN	DB Search	KVLFPLLTK	KVLFPLLTK
159	LFDDIDHNM	27.7	1118.47	9	44.4	9	2.7	560.244	2	41.4145	-4.0608	0.83	2042865	Neo_sh14_patient1_HLAI_0412_HM1114_tims_Slot1-36_1_3662.d	45297	0.8466	0.8563	0.0385	310	5220	1	1	1	1			5 38 41 0 0 7 0 0 0	LFDDIDHNM	O60502|OGA_HUMAN	DB Search	LFDDIDHNM	LFDDIDHNM
160	LYDEAIRHF	50.82	1162.58	9	77.8	9	5.9	582.299	2	31.5844	2.4498	0.9	1560599	Neo_sh14_patient1_HLAI_0412_HM1114_tims_Slot1-36_1_3662.d	34883	0.9009	0.9106	0.0342			2	2	0	0			5 51 37 20 8 5 2 0 0	LYDEAIRHF	Q8NBP0|TTC13_HUMAN	DB Search	LYDEAIRHF	LYDEAIRHF
161	SAVGHVFSL	41.5	915.481	9	100	9	-1.5	458.747	2	41.5219	-1.1658	0.76	2050377	Neo_sh14_patient1_HLAI_0412_HM1114_tims_Slot1-36_1_3662.d	45465	0.7885	0.7982	0.0267			3	3	0	0			5 25 49 49 13 80 59 11 5	SAVGHVFSL	Q69YN4|VIR_HUMAN	DB Search	SAVGHVFSL	SAVGHVFSL
162	RLHEVLTEV	30.3	1094.61	9	66.7	9	-0.7	548.311	2	24.2229	0.0088	0.83	1205020	Neo_sh14_patient1_HLAI_0412_HM1114_tims_Slot1-36_1_3662.d	29980	0.8749	0.8846	0.0202			2	2	0	0			0 0 0 23 72 84 9 9 5	RLHEVLTEV	Q5VWP2|TET5C_HUMAN	DB Search	RLHEVLTEV	RLHEVLTEV
163	RSYSSVIEK	39.48	1067.56	9	77.8	9	1.7	534.789	2	13.7656	0.1428	0.91	683163	Neo_sh14_patient1_HLAI_0412_HM1114_tims_Slot1-36_1_3662.d	14859	0.8528	0.8625	0.0323			1	1	0	0			3 1 1 4 2 33 68 41 5	RSYSSVIEK	Q9Y3R5|DOP2_HUMAN	DB Search	RSYSSVIEK	RSYSSVIEK
164	KVATTVISK	38.5	945.586	9	77.8	9	-3.5	473.799	2	11.4507	1.8522	0.88	567380	Neo_sh14_patient1_HLAI_0412_HM1114_tims_Slot1-36_1_3662.d	11072	0.8017	0.8114	0.0335			1	1	0	0			5 46 20 8 5 4 3 0 0	KVATTVISK	P05155|IC1_HUMAN	DB Search	KVATTVISK	KVATTVISK
165	TVMDEIHTV	30.15	1043.5	9	44.4	9	-1.1	522.755	2	36.9764	-1.7838	0.75	1825145	Neo_sh14_patient1_HLAI_0412_HM1114_tims_Slot1-36_1_3662.d	40553	0.8439	0.8536	0.0113			1	1	0	0			5 25 37 0 0 8 0 0 0	TVMDEIHTV	Q8IX12|CCAR1_HUMAN	DB Search	TVMDEIHTV	TVMDEIHTV
166	FYDERIVVV	41.47	1138.6	9	77.8	9	1.9	570.309	2	47.2361	1.3842	0.82	2330315	Neo_sh14_patient1_HLAI_0412_HM1114_tims_Slot1-36_1_3662.d	50003	0.8784	0.8881	0.0368	680	11600	2	2	1	1			5 35 21 0 0 25 28 25 5	FYDERIVVV	Q9P265|DIP2B_HUMAN	DB Search	FYDERIVVV	FYDERIVVV
167	QIYSVVLKK	34.56	1076.66	9	44.4	9	-9.9	539.332	2	24.5262	0.0141	0.81	1220211	Neo_sh14_patient1_HLAI_0412_HM1114_tims_Slot1-36_1_3662.d	30483	0.8551	0.8648	0.06			1	1	0	0			0 0 64 14 3 3 0 0 0	QIYSVVLKK	P20592|MX2_HUMAN	DB Search	QIYSVVLKK	QIYSVVLKK
168	GVNPYILKK	31.98	1030.62	9	55.6	9	-2.4	516.315	2	22.0627	-0.6362	0.86	1097190	Neo_sh14_patient1_HLAI_0412_HM1114_tims_Slot1-36_1_3662.d	26802	0.847	0.8567	0.0282			1	1	0	0			0 0 35 14 5 5 2 0 1	GVNPYILKK	Q9NVA1|UQCC1_HUMAN	DB Search	GVNPYILKK	GVNPYILKK
169	KLFDKLLEY	30.04	1167.65	9	100	9	1.3	584.835	2	48.7196	-0.0464	0.63	2403052	Neo_sh14_patient1_HLAI_0412_HM1114_tims_Slot1-36_1_3662.d	51136	0.8877	0.8974	0.0474	751	11800	2	2	1	1			5 17 9 9 24 24 20 20 5	KLFDKLLEY	Q9BZZ5|API5_HUMAN	DB Search	KLFDKLLEY	KLFDKLLEY
170	KLRQPFFQK	37.75	1190.69	9	77.8	9	0.1	596.354	2	18.3336	1.0976	0.75	910163	Neo_sh14_patient1_HLAI_0412_HM1114_tims_Slot1-36_1_3662.d	21539	0.8896	0.8993	0.0455	14400	141000	6	6	2	2			5 1 1 2 2 2 14 14 5	KLRQPFFQK	P0DME0|SETLP_HUMAN:Q01105|SET_HUMAN	DB Search	KLRQPFFQK	KLRQPFFQK
171	TASPFFRAL	32.13	1008.54	9	55.6	9	7.8	505.281	2	48.0696	0.1667	0.83	2373197	Neo_sh14_patient1_HLAI_0412_HM1114_tims_Slot1-36_1_3662.d	50657	0.8141	0.8237	0.0311			1	1	0	0			5 8 42 48 20 0 0 0 0	TASPFFRAL	Q96C12|ARMC5_HUMAN	DB Search	TASPFFRAL	TASPFFRAL
172	TAVGHALVL	40.02	879.518	9	100	9	0.1	440.766	2	36.4674	1.1915	0.87	1798781	Neo_sh14_patient1_HLAI_0412_HM1114_tims_Slot1-36_1_3662.d	39893	0.7904	0.8001	0.0047	108000	849000	7	7	1	1			5 15 7 5 2 41 89 17 5	TAVGHALVL	P12111|CO6A3_HUMAN	DB Search	TAVGHALVL	TAVGHALVL
173	KVNAVFSQK	43.09	1019.58	9	100	9	2.2	510.797	2	12.8175	-0.1603	0.86	635802	Neo_sh14_patient1_HLAI_0412_HM1114_tims_Slot1-36_1_3662.d	13398	0.8423	0.852	0.0128			1	1	0	0			5 49 32 21 21 13 9 6 5	KVNAVFSQK	Q9P1T7|MDFIC_HUMAN	DB Search	KVNAVFSQK	KVNAVFSQK
174	QIFKPIISK	29.02	1072.66	9	44.4	9	3.4	537.341	2	29.4271	-5.7116	0.85	1454197	Neo_sh14_patient1_HLAI_0412_HM1114_tims_Slot1-36_1_3662.d	33133	0.9032	0.9129	0.0019			1	1	0	0			0 0 25 25 6 6 0 0 0	QIFKPIISK	Q92769|HDAC2_HUMAN	DB Search	QIFKPIISK	QIFKPIISK
175	VFDIVIHRF	34.37	1144.64	9	44.4	9	-7.2	573.323	2	49.0916	-0.4949	0.67	2423531	Neo_sh14_patient1_HLAI_0412_HM1114_tims_Slot1-36_1_3662.d	51419	0.9102	0.9199	0.0249			2	2	0	0			5 93 60 60 0 0 0 0 0	VFDIVIHRF	Q9ULK4|MED23_HUMAN	DB Search	VFDIVIHRF	VFDIVIHRF
176	ALASRFLKK	38.83	1032.64	9	100	9	0.3	517.33	2	16.4014	-0.4687	0.81	811705	Neo_sh14_patient1_HLAI_0412_HM1114_tims_Slot1-36_1_3662.d	18553	0.8629	0.8726	0.0423	8910	87000	2	2	1	1			5 25 23 5 3 13 13 32 5	ALASRFLKK	Q99613|EIF3C_HUMAN:B5ME19|EIFCL_HUMAN	DB Search	ALASRFLKK	ALASRFLKK
177	RTLDSVLKK	42.73	1058.64	9	44.4	9	6.5	353.891	3	15.0544	0.373	0.67	747510	Neo_sh14_patient1_HLAI_0412_HM1114_tims_Slot1-36_1_3662.d	16782	0.6606	0.6702	0.0446			1	1	0	0			0 0 19 31 87 37 0 0 0	RTLDSVLKK	Q8IWI9|MGAP_HUMAN	DB Search	RTLDSVLKK	RTLDSVLKK
178	SVNGKVLSK	42.1	930.55	9	100	9	-1.3	466.282	2	8.5585	-2.9063	0.93	421161	Neo_sh14_patient1_HLAI_0412_HM1114_tims_Slot1-36_1_3662.d	6225	0.809	0.8187	0.0161	79300	975000	2	2	1	1			5 7 32 8 8 7 8 3 3	SVNGKVLSK	Q15155|NOMO1_HUMAN:P69849|NOMO3_HUMAN:Q5JPE7|NOMO2_HUMAN	DB Search	SVNGKVLSK	SVNGKVLSK
179	HPERVSYVL	28.54	1098.58	9	44.4	9	4.2	550.301	2	23.4613	-0.1706	0.78	1161548	Neo_sh14_patient1_HLAI_0412_HM1114_tims_Slot1-36_1_3662.d	28736	0.8621	0.8718	0.043	5210	33800	3	3	1	1			5 7 6 0 0 0 8 0 0	HPERVSYVL	P78325|ADAM8_HUMAN	DB Search	HPERVSYVL	HPERVSYVL
180	IYDKFIAQL	21.94	1109.61	9	66.7	9	-5	555.811	2	51.287	0.4847	0.51	2531509	Neo_sh14_patient1_HLAI_0412_HM1114_tims_Slot1-36_1_3662.d	52909	0.8962	0.9059	0.0089			1	1	0	0			5 0 0 7 0 16 16 4 4	IYDKFIAQL	Q6P1K2|PMF1_HUMAN	DB Search	IYDKFIAQL	IYDKFIAQL
181	KIRDVLIQK	21.23	1111.71	9	55.6	9	4.7	371.578	3	16.4932	-0.7124	0.68	819256	Neo_sh14_patient1_HLAI_0412_HM1114_tims_Slot1-36_1_3662.d	18760	0.6934	0.703	0.0218			1	1	0	0			5 4 0 0 24 24 35 0 0	KIRDVLIQK	Q9P2X3|IMPCT_HUMAN	DB Search	KIRDVLIQK	KIRDVLIQK
182	MPQTHHHAL	54.89	1070.51	9	77.8	9	3.5	536.263	2	7.6212	-1.0245	0.71	375636	Neo_sh14_patient1_HLAI_0412_HM1114_tims_Slot1-36_1_3662.d	4764	0.8501	0.8598	0.0151			1	1	0	0			5 39 32 15 15 8 15 0 0	MPQTHHHAL	Q9H583|HEAT1_HUMAN	DB Search	MPQTHHHAL	MPQTHHHAL
183	RLLEM(+15.99)ILNK	30.67	1144.66	9	77.8	9	4.1	573.341	2	34.2477	1.6277	0.7	1689842	Neo_sh14_patient1_HLAI_0412_HM1114_tims_Slot1-36_1_3662.d	37442	0.8706	0.8803	0.0545			3	3	0	0	Oxidation (M)	M5:Oxidation (M):1000.00	0 0 5 7 15 25 25 22 5	RLLEM(+15.99)ILNK	P52895|AK1C2_HUMAN	DB Search	RLLEMILNK	RLLEMILNK
184	RFDYTNSEF	28.2	1177.5	9	66.7	9	1.3	589.76	2	34.134	-3.782	0.75	1684235	Neo_sh14_patient1_HLAI_0412_HM1114_tims_Slot1-36_1_3662.d	37343	0.8683	0.878	0.0368			1	1	0	0			0 0 0 26 39 43 53 53 5	RFDYTNSEF	Q7Z449|CP2U1_HUMAN	DB Search	RFDYTNSEF	RFDYTNSEF
185	SMYYPLQLK	33.19	1141.58	9	44.4	9	3.6	571.801	2	45.8369	0.1523	0.89	2263108	Neo_sh14_patient1_HLAI_0412_HM1114_tims_Slot1-36_1_3662.d	48892	0.8772	0.8869	0.0379			4	4	0	0			0 0 56 60 9 4 0 0 0	SMYYPLQLK	A0PJZ3|GXLT2_HUMAN	DB Search	SMYYPLQLK	SMYYPLQLK
186	TPDEIDHVF	47.97	1071.49	9	77.8	9	1.8	536.752	2	39.7967	-4.1002	0.7	1960351	Neo_sh14_patient1_HLAI_0412_HM1114_tims_Slot1-36_1_3662.d	43567	0.847	0.8567	0.0082	32700	306000	7	7	1	1			5 67 48 41 13 13 93 0 0	TPDEIDHVF	Q460N5|PAR14_HUMAN	DB Search	TPDEIDHVF	TPDEIDHVF
187	ALASVVIHK	31.25	936.576	9	77.8	9	3.8	469.297	2	21.5703	-1.7583	0.78	1072658	Neo_sh14_patient1_HLAI_0412_HM1114_tims_Slot1-36_1_3662.d	26138	0.8024	0.8121	0.0427			1	1	0	0			2 2 23 9 7 7 10 0 0	ALASVVIHK	Q6PIW4|FIGL1_HUMAN	DB Search	ALASVVIHK	ALASVVIHK
188	AVYKTHVEK	54.28	1073.59	9	88.9	9	-0.4	537.801	2	3.4776	-2.812	0.79	162454	Neo_sh14_patient1_HLAI_0412_HM1114_tims_Slot1-36_1_3662.d	886	0.8408	0.8505	0.0644	711	2320	9	9	1	1			2 2 27 27 13 1 12 9 5	AVYKTHVEK	P49662|CASP4_HUMAN	DB Search	AVYKTHVEK	AVYKTHVEK
189	YYDLVRTEI	24.34	1170.59	9	55.6	9	5.2	586.306	2	44.5123	-2.1489	0.83	2197775	Neo_sh14_patient1_HLAI_0412_HM1114_tims_Slot1-36_1_3662.d	47819	0.9106	0.9203	0.0145			1	1	0	0			5 42 64 26 18 0 0 0 0	YYDLVRTEI	Q07890|SOS2_HUMAN	DB Search	YYDLVRTEI	YYDLVRTEI
190	NYDFGPIHM	33.63	1092.47	9	44.4	9	1.3	547.243	2	51.8168	2.9437	0.81	2557427	Neo_sh14_patient1_HLAI_0412_HM1114_tims_Slot1-36_1_3662.d	53123	0.8358	0.8454	0.0294			2	2	0	0			1 1 53 50 18 0 0 0 2	NYDFGPIHM	Q9NWF9|RN216_HUMAN	DB Search	NYDFGPIHM	NYDFGPIHM
191	RTFSYIKNK	42.97	1155.64	9	55.6	9	0.5	386.221	3	11.5266	1.1185	0.62	571191	Neo_sh14_patient1_HLAI_0412_HM1114_tims_Slot1-36_1_3662.d	11211	0.7088	0.7185	0.0063			3	3	0	0			0 0 12 51 51 40 2 0 0	RTFSYIKNK	Q12802|AKP13_HUMAN	DB Search	RTFSYIKNK	RTFSYIKNK
192	ALFKNLLLK	33	1058.69	9	77.8	9	0.3	530.35	2	44.4366	-0.4927	0.76	2194052	Neo_sh14_patient1_HLAI_0412_HM1114_tims_Slot1-36_1_3662.d	47768	0.8734	0.8831	0.0418			2	2	0	0			5 8 52 25 6 17 5 0 0	ALFKNLLLK	P42226|STAT6_HUMAN	DB Search	ALFKNLLLK	ALFKNLLLK
193	HVNPKFLNK	43.38	1095.62	9	55.6	9	-11.5	366.209	3	12.8934	0.9437	0.58	639582	Neo_sh14_patient1_HLAI_0412_HM1114_tims_Slot1-36_1_3662.d	13506	0.6698	0.6795	0.0553			1	1	0	0			0 0 7 24 31 29 26 0 0	HVNPKFLNK	O94913|PCF11_HUMAN	DB Search	HVNPKFLNK	HVNPKFLNK
194	KLLGELHTL	21.72	1022.61	9	55.6	9	-1.2	512.313	2	35.423	0.2843	0.63	1748029	Neo_sh14_patient1_HLAI_0412_HM1114_tims_Slot1-36_1_3662.d	38713	0.8726	0.8823	0.0026			1	1	0	0			5 53 53 0 0 7 9 0 0	KLLGELHTL	Q15154|PCM1_HUMAN	DB Search	KLLGELHTL	KLLGELHTL
195	SLSPVILIK	28.84	968.627	9	66.7	9	2.9	485.322	2	49.7326	1.2523	0.84	2453337	Neo_sh14_patient1_HLAI_0412_HM1114_tims_Slot1-36_1_3662.d	51849	0.8114	0.821	0.0338	171	2860	2	2	1	1			5 5 51 19 16 4 0 0 0	SLSPVILIK	Q9Y4K1|CRBG1_HUMAN	DB Search	SLSPVILIK	SLSPVILIK
196	HPQPIDPLL	25.3	1028.57	9	66.7	9	-5.3	515.287	2	43.3011	-2.509	0.81	2138085	Neo_sh14_patient1_HLAI_0412_HM1114_tims_Slot1-36_1_3662.d	46881	0.8206	0.8303	0.0545			1	1	0	0			0 0 0 5 5 14 33 16 5	HPQPIDPLL	Q86VP6|CAND1_HUMAN	DB Search	HPQPIDPLL	HPQPIDPLL
197	KITAPLINK	32.24	996.633	9	77.8	9	5.3	499.326	2	22.4035	1.8933	0.85	1114153	Neo_sh14_patient1_HLAI_0412_HM1114_tims_Slot1-36_1_3662.d	27241	0.8191	0.8288	0.0361			1	1	0	0			5 43 20 20 0 0 3 5 5	KITAPLINK	Q9H8M1|CQ10B_HUMAN	DB Search	KITAPLINK	KITAPLINK
198	MFDKDVVML	31.06	1096.53	9	44.4	9	3.8	549.274	2	51.6276	1.183	0.79	2548166	Neo_sh14_patient1_HLAI_0412_HM1114_tims_Slot1-36_1_3662.d	53042	0.8916	0.9013	0.0036			1	1	0	0			0 0 0 7 7 91 57 0 0	MFDKDVVML	Q8IWV8|UBR2_HUMAN	DB Search	MFDKDVVML	MFDKDVVML
199	NYDEALRLL	39.2	1105.58	9	66.7	9	3.9	553.798	2	52.0817	1.8518	0.9	2570445	Neo_sh14_patient1_HLAI_0412_HM1114_tims_Slot1-36_1_3662.d	53289	0.8621	0.8718	0.033			1	1	0	0			5 6 32 26 8 3 1 0 0	NYDEALRLL	Q9HCS7|SYF1_HUMAN	DB Search	NYDEALRLL	NYDEALRLL
200	KTLNIFLTK	34.92	1076.66	9	100	9	7.9	539.341	2	35.5745	2.3011	0.72	1755551	Neo_sh14_patient1_HLAI_0412_HM1114_tims_Slot1-36_1_3662.d	38891	0.8586	0.8683	0.0365			1	1	0	0			5 48 21 21 37 38 14 14 5	KTLNIFLTK	Q8TD19|NEK9_HUMAN	DB Search	KTLNIFLTK	KTLNIFLTK
201	RLAQHITYV	28.93	1099.61	9	66.7	9	-5.2	550.811	2	21.3656	0.3932	0.8	1059456	Neo_sh14_patient1_HLAI_0412_HM1114_tims_Slot1-36_1_3662.d	25788	0.871	0.8807	0.0341	520	5630	2	2	1	1			0 0 0 3 57 22 22 3 3	RLAQHITYV	P33993|MCM7_HUMAN	DB Search	RLAQHITYV	RLAQHITYV
202	QLAQFVHEV	28.67	1069.56	9	44.4	9	-0.1	535.785	2	39.2119	0.5404	0.81	1935959	Neo_sh14_patient1_HLAI_0412_HM1114_tims_Slot1-36_1_3662.d	43043	0.8706	0.8803	0.0145			1	1	0	0			0 0 26 26 14 14 0 0 0	QLAQFVHEV	Q92771|DDX12_HUMAN:Q96FC9|DDX11_HUMAN:A8MPP1|D11L8_HUMAN	DB Search	QLAQFVHEV	QLAQFVHEV
203	SPASSFHVL	44.87	943.476	9	77.8	9	3.1	472.747	2	37.1659	2.5371	0.88	1834530	Neo_sh14_patient1_HLAI_0412_HM1114_tims_Slot1-36_1_3662.d	40758	0.8009	0.8106	0.0143			1	1	0	0			0 0 50 28 7 7 3 4 4	SPASSFHVL	P18084|ITB5_HUMAN	DB Search	SPASSFHVL	SPASSFHVL
204	KLISTLIYK	34.95	1077.68	9	55.6	9	3.8	539.849	2	33.6245	-0.3853	0.74	1659843	Neo_sh14_patient1_HLAI_0412_HM1114_tims_Slot1-36_1_3662.d	36819	0.8714	0.8811	0.0337			1	1	0	0			5 15 44 9 0 0 20 0 0	KLISTLIYK	O14980|XPO1_HUMAN	DB Search	KLISTLIYK	KLISTLIYK
205	ALYKKILKY	37.57	1138.71	9	77.8	9	0.9	570.363	2	22.7177	0.3842	0.76	1125518	Neo_sh14_patient1_HLAI_0412_HM1114_tims_Slot1-36_1_3662.d	27590	0.9188	0.9285	0.0364	10700	102000	2	2	1	1			0 0 59 59 11 71 46 4 4	ALYKKILKY	Q9NX57|RAB20_HUMAN	DB Search	ALYKKILKY	ALYKKILKY
206	RLQEELIAV	30.15	1069.61	9	66.7	9	-5.4	535.811	2	42.5442	0.7553	0.93	2100855	Neo_sh14_patient1_HLAI_0412_HM1114_tims_Slot1-36_1_3662.d	46371	0.8714	0.8811	0.0237			1	1	0	0			0 0 0 3 9 99 50 21 5	RLQEELIAV	O60447|EVI5_HUMAN	DB Search	RLQEELIAV
207	ALSTPVVEK	37.87	942.539	9	66.7	9	-0.5	472.276	2	21.684	-0.3033	0.83	1078347	Neo_sh14_patient1_HLAI_0412_HM1114_tims_Slot1-36_1_3662.d	26319	0.7812	0.7908	0.034			2	2	0	0			5 5 14 14 1 3 2 0 0	ALSTPVVEK	P29084|T2EB_HUMAN	DB Search	ALSTPVVEK	ALSTPVVEK
208	HPSHEQIIL	19.11	1072.57	9	33.3	9	8.9	537.295	2	21.8356	1.3254	0.83	1085868	Neo_sh14_patient1_HLAI_0412_HM1114_tims_Slot1-36_1_3662.d	26496	0.847	0.8567	0.0382			1	1	0	0			0 0 1 0 6 24 69 0 0	HPSHEQIIL	Q7Z3T8|ZFY16_HUMAN	DB Search	HPSHEQIIL
209	IYDLVDRHL	42.64	1142.61	9	66.7	9	-3.3	572.31	2	36.5215	-0.7701	0.89	1802535	Neo_sh14_patient1_HLAI_0412_HM1114_tims_Slot1-36_1_3662.d	39975	0.9145	0.9242	0.0207			1	1	0	0			5 50 40 27 16 9 1 0 1	IYDLVDRHL	Q9NXR8|ING3_HUMAN	DB Search	IYDLVDRHL	IYDLVDRHL
210	LYDLVTEKM	42.22	1110.56	9	77.8	9	7.8	556.293	2	42.4307	-2.7092	0.8	2095281	Neo_sh14_patient1_HLAI_0412_HM1114_tims_Slot1-36_1_3662.d	46305	0.8703	0.88	0.0349			1	1	0	0			5 38 11 11 35 18 18 0 0	LYDLVTEKM	Q9H173|SIL1_HUMAN	DB Search	LYDLVTEKM	LYDLVTEKM
211	SPFSFHHVL	60.19	1069.53	9	100	9	2.9	535.776	2	37.6275	-1.0883	0.75	1853369	Neo_sh14_patient1_HLAI_0412_HM1114_tims_Slot1-36_1_3662.d	41237	0.8695	0.8792	-0.0043	9640	105000	4	4	1	1			5 43 51 17 17 26 32 7 5	SPFSFHHVL	P26010|ITB7_HUMAN	DB Search	SPFSFHHVL	SPFSFHHVL
212	HYDYIDVEM	29.55	1183.49	9	77.8	9	2.5	592.752	2	44.7015	-2.43	0.92	2207070	Neo_sh14_patient1_HLAI_0412_HM1114_tims_Slot1-36_1_3662.d	47934	0.8811	0.8908	0.034			1	1	0	0			0 0 8 8 15 15 24 4 4	HYDYIDVEM	Q8N556|AFAP1_HUMAN	DB Search	HYDYIDVEM	HYDYIDVEM
213	ILSGPFVQK	36.82	987.575	9	77.8	9	16.3	494.803	2	34.3235	1.4002	0.91	1693621	Neo_sh14_patient1_HLAI_0412_HM1114_tims_Slot1-36_1_3662.d	37549	0.8237	0.8334	0.0114			2	2	0	0			5 24 29 11 6 3 2 0 0	ILSGPFVQK	P22102|PUR2_HUMAN	DB Search	ILSGPFVQK	ILSGPFVQK
214	RLFGTTVTFK	50.9	1168.66	10	60	10	0.6	585.338	2	35.7094	2.3863	0.77	1759292	Neo_sh14_patient1_HLAI_0412_HM1114_tims_Slot1-36_1_3662.d	38960	0.8974	0.9071	0.0377	11400	114000	3	3	1	1			1 1 2 1 1 4 22 22 28 5	RLFGTTVTFK	Q15904|VAS1_HUMAN	DB Search	RLFGTTVTFK	RLFGTTVTFK
215	AFDVHLNAF	41.11	1032.5	9	100	9	-2.7	517.257	2	52.0817	0.4238	0.75	2570442	Neo_sh14_patient1_HLAI_0412_HM1114_tims_Slot1-36_1_3662.d	53286	0.8214	0.8311	0.0337			2	2	0	0			5 26 10 10 5 22 22 35 5	AFDVHLNAF	Q53HI1|UNC50_HUMAN	DB Search	AFDVHLNAF	AFDVHLNAF
216	FFDHSGTLV	37.82	1021.49	9	55.6	9	3.9	511.753	2	41.3705	1.1033	0.84	2042877	Neo_sh14_patient1_HLAI_0412_HM1114_tims_Slot1-36_1_3662.d	45309	0.8365	0.8462	0.0086			1	1	0	0			1 1 0 0 4 4 8 3 3	FFDHSGTLV	Q15005|SPCS2_HUMAN	DB Search	FFDHSGTLV	FFDHSGTLV
217	RTFTWLVGK	39.06	1106.62	9	55.6	9	-2.2	554.318	2	37.6288	-0.6876	0.94	1857109	Neo_sh14_patient1_HLAI_0412_HM1114_tims_Slot1-36_1_3662.d	41305	0.8641	0.8737	0.0411	6890	66400	2	2	1	1			1 0 0 0 30 92 57 21 5	RTFTWLVGK	O00159|MYO1C_HUMAN	DB Search	RTFTWLVGK	RTFTWLVGK
218	SLMHTIYEV	32.23	1091.53	9	55.6	9	-1.2	546.773	2	42.8849	-4.3542	0.85	2117632	Neo_sh14_patient1_HLAI_0412_HM1114_tims_Slot1-36_1_3662.d	46624	0.8931	0.9028	-0.008			1	1	0	0			0 0 0 0 16 83 42 6 5	SLMHTIYEV	Q969F2|NKD2_HUMAN	DB Search	SLMHTIYEV	SLMHTIYEV
219	ALYQKVLLY	23.2	1109.65	9	33.3	9	2	555.833	2	47.6534	1.1451	0.75	2352678	Neo_sh14_patient1_HLAI_0412_HM1114_tims_Slot1-36_1_3662.d	50334	0.8672	0.8768	0.058			1	1	0	0			0 0 14 39 0 0 87 0 0	ALYQKVLLY	Q8IY92|SLX4_HUMAN	DB Search	ALYQKVLLY	ALYQKVLLY
220	KTSERFLFK	26.32	1154.64	9	88.9	9	-9	578.324	2	18.4912	0.7374	0.88	917723	Neo_sh14_patient1_HLAI_0412_HM1114_tims_Slot1-36_1_3662.d	21755	0.8815	0.8912	0.0336	545	8720	3	3	1	1			5 41 4 4 1 2 5 20 5	KTSERFLFK	P54803|GALC_HUMAN	DB Search	KTSERFLFK
221	IFDVHVHEV	44.18	1093.56	9	66.7	9	1.7	547.786	2	34.6604	1.3373	0.74	1710524	Neo_sh14_patient1_HLAI_0412_HM1114_tims_Slot1-36_1_3662.d	37928	0.8741	0.8838	0.011	1720	21600	2	2	1	1			5 50 18 18 31 31 0 0 0	IFDVHVHEV	O15031|PLXB2_HUMAN	DB Search	IFDVHVHEV	IFDVHVHEV
222	KLKEEVINK	42.34	1099.66	9	100	9	2.4	550.839	2	9.7197	-0.3314	0.81	478097	Neo_sh14_patient1_HLAI_0412_HM1114_tims_Slot1-36_1_3662.d	8081	0.866	0.8757	0.0292	1780	31600	2	2	1	1			5 41 23 3 3 4 28 8 5	KLKEEVINK	Q96G28|CFA36_HUMAN	DB Search	KLKEEVINK	KLKEEVINK
223	RTFGHLLRY	47.43	1161.64	9	55.6	9	15.4	388.227	3	23.4271	-1.8072	0.82	1165328	Neo_sh14_patient1_HLAI_0412_HM1114_tims_Slot1-36_1_3662.d	28844	0.7262	0.7359	0.0289	6650	58300	4	4	1	1			0 0 2 18 38 29 4 0 0	RTFGHLLRY	Q13200|PSMD2_HUMAN	DB Search	RTFGHLLRY	RTFGHLLRY
224	RFDHVITNM	58.07	1131.55	9	55.6	9	-0.2	566.782	2	27.308	3.1421	0.54	1349874	Neo_sh14_patient1_HLAI_0412_HM1114_tims_Slot1-36_1_3662.d	31626	0.683	0.6926	0.2122	803	8220	7	7	1	1			0 0 1 1 2 9 3 3 3	RFDHVITNM	P02746|C1QB_HUMAN	DB Search	RFDHVITNM	RFDHVITNM
225	RVFYALSNK	29.31	1096.6	9	66.7	9	3.8	549.311	2	21.8735	-1.1073	0.77	1087778	Neo_sh14_patient1_HLAI_0412_HM1114_tims_Slot1-36_1_3662.d	26570	0.8703	0.88	0.0249			1	1	0	0			0 0 7 0 29 60 60 24 5	RVFYALSNK	Q15751|HERC1_HUMAN	DB Search	RVFYALSNK	RVFYALSNK
226	RVKTPYSLK	32.18	1090.65	9	33.3	9	4.2	546.334	2	13.3107	-0.5282	0.65	660429	Neo_sh14_patient1_HLAI_0412_HM1114_tims_Slot1-36_1_3662.d	14157	0.8722	0.8819	0.033			2	2	0	0			0 0 1 1 0 1 5 3 3	RVKTPYSLK	Q13873|BMPR2_HUMAN	DB Search	RVKTPYSLK	RVKTPYSLK
227	VLYDRVLKY	45.61	1167.67	9	88.9	9	2.2	584.841	2	35.7639	-1.7954	0.84	1764933	Neo_sh14_patient1_HLAI_0412_HM1114_tims_Slot1-36_1_3662.d	39093	0.9098	0.9195	0.0453	16600	187000	3	3	1	1			5 29 11 10 1 20 20 10 5	VLYDRVLKY	Q9UHB9|SRP68_HUMAN	DB Search	VLYDRVLKY	VLYDRVLKY
228	QPVHPDVTM	21.57	1022.49	9	33.3	9	-3.3	512.248	2	23.8242	-5.652	0.33	1184149	Neo_sh14_patient1_HLAI_0412_HM1114_tims_Slot1-36_1_3662.d	29305	0.8187	0.8284	0.0264	1420	15600	1	1	1	1			2 1 1 2 0 0 3 0 0	QPVHPDVTM	Q9Y6X2|PIAS3_HUMAN	DB Search	QPVHPDVTM
229	SPDHSDHTL	48.54	1007.43	9	100	9	3.6	504.724	2	6.9542	1.0009	0.75	339375	Neo_sh14_patient1_HLAI_0412_HM1114_tims_Slot1-36_1_3662.d	3387	0.8075	0.8172	0.0177	38500	321000	3	3	1	1			5 58 62 27 8 8 54 32 5	SPDHSDHTL	Q68CZ2|TENS3_HUMAN	DB Search	SPDHSDHTL	SPDHSDHTL
230	RLATSLVEK	26.15	1015.6	9	44.4	9	4.2	508.811	2	17.251	-2.1088	0.89	857190	Neo_sh14_patient1_HLAI_0412_HM1114_tims_Slot1-36_1_3662.d	19974	0.8567	0.8664	0.0185			1	1	0	0			0 0 0 0 1 40 66 56 5	RLATSLVEK	Q96BZ9|TBC20_HUMAN	DB Search	RLATSLVEK	RLATSLVEK
231	YVHETLTVY	27.61	1123.55	9	77.8	9	1.9	562.786	2	33.3639	-1.7748	0.67	1648610	Neo_sh14_patient1_HLAI_0412_HM1114_tims_Slot1-36_1_3662.d	36602	0.873	0.8827	0.0122			2	2	0	0			0 0 5 16 21 27 29 4 4	YVHETLTVY	Q96SW2|CRBN_HUMAN	DB Search	YVHETLTVY	YVHETLTVY
232	ALFKHILLY	21.84	1116.67	9	44.4	9	4.4	559.344	2	48.0696	1.8838	0.79	2373193	Neo_sh14_patient1_HLAI_0412_HM1114_tims_Slot1-36_1_3662.d	50653	0.9083	0.918	0.0169			1	1	0	0			0 0 0 0 0 36 19 15 5	ALFKHILLY	Q9Y3R5|DOP2_HUMAN	DB Search	ALFKHILLY	ALFKHILLY
233	KVHYGFILK	46.52	1103.65	9	100	9	2.8	552.833	2	24.1472	1.4204	0.79	1201230	Neo_sh14_patient1_HLAI_0412_HM1114_tims_Slot1-36_1_3662.d	29862	0.8699	0.8796	0.0353			1	1	0	0			2 2 40 29 6 11 58 30 5	KVHYGFILK	Q12797|ASPH_HUMAN	DB Search	KVHYGFILK	KVHYGFILK
234	YLDEYIARM	31.78	1172.55	9	66.7	9	2.2	587.285	2	46.3687	-0.1397	0.9	2287372	Neo_sh14_patient1_HLAI_0412_HM1114_tims_Slot1-36_1_3662.d	49288	0.897	0.9067	0.0281	189	3090	1	1	1	1			5 22 38 15 12 2 1 0 0	YLDEYIARM	P49815|TSC2_HUMAN	DB Search	YLDEYIARM	YLDEYIARM
235	VYDLLKTNL	40.63	1077.61	9	66.7	9	3.2	539.812	2	48.4991	-0.481	0.76	2391845	Neo_sh14_patient1_HLAI_0412_HM1114_tims_Slot1-36_1_3662.d	50945	0.8749	0.8846	0.0202	454	8830	1	1	1	1			5 7 34 34 82 13 0 0 0	VYDLLKTNL	Q99460|PSMD1_HUMAN	DB Search	VYDLLKTNL	VYDLLKTNL
236	RLYEM(+15.99)ILKR	33.54	1236.7	9	55.6	9	10.1	413.245	3	21.7598	0.7874	0.88	1082099	Neo_sh14_patient1_HLAI_0412_HM1114_tims_Slot1-36_1_3662.d	26399	0.7177	0.7274	0.0174			1	1	0	0	Oxidation (M)	M5:Oxidation (M):1000.00	0 0 6 29 26 39 6 0 0	RLYEM(+15.99)ILKR	P49703|ARL4D_HUMAN	DB Search	RLYEMILKR	RLYEMILKR
237	RLMDRPIFY	31.53	1209.63	9	0	9	0.2	605.824	2	39.3255	0.2997	0.85	1941576	Neo_sh14_patient1_HLAI_0412_HM1114_tims_Slot1-36_1_3662.d	43152	0.8893	0.899	0.0459	3980	47600	4	4	1	1			1 1 0 1 1 1 0 0 0	RLMDRPIFY	P34059|GALNS_HUMAN	DB Search	RLMDRPIFY	RLMDRPIFY
238	KLYEM(+15.99)ILKR	27.96	1208.7	9	66.7	9	0.7	605.355	2	21.7629	1.8603	0.82	1074525	Neo_sh14_patient1_HLAI_0412_HM1114_tims_Slot1-36_1_3662.d	26169	0.9331	0.9428	0.022	4770	26500	1	1	1	1	Oxidation (M)	M5:Oxidation (M):1000.00	5 20 25 16 10 10 0 0 0	KLYEM(+15.99)ILKR	P56559|ARL4C_HUMAN	DB Search	KLYEMILKR	KLYEMILKR
239	KVGEVIVTK	30.09	971.601	9	77.8	9	4.6	486.81	2	15.0922	-0.002	0.76	749406	Neo_sh14_patient1_HLAI_0412_HM1114_tims_Slot1-36_1_3662.d	16842	0.7978	0.8075	0.0474			1	1	0	0			5 83 3 0 0 14 17 10 5	KVGEVIVTK	P10809|CH60_HUMAN	DB Search	KVGEVIVTK	KVGEVIVTK
240	SLFSNVVTK	34.44	993.549	9	66.7	9	0	497.782	2	37.4313	0.4966	0.93	1847707	Neo_sh14_patient1_HLAI_0412_HM1114_tims_Slot1-36_1_3662.d	41083	0.8296	0.8392	0.0156			2	2	0	0			5 5 63 8 2 0 3 0 0	SLFSNVVTK	P31939|PUR9_HUMAN	DB Search	SLFSNVVTK	SLFSNVVTK
241	KVAVVLIQK	29.1	996.669	9	77.8	9	-2.9	499.341	2	23.2754	0.4086	0.78	1157704	Neo_sh14_patient1_HLAI_0412_HM1114_tims_Slot1-36_1_3662.d	28564	0.8253	0.835	0.0399			1	1	0	0			5 53 5 5 11 8 0 0 5	KVAVVLIQK	Q7Z392|TPC11_HUMAN	DB Search	KVAVVLIQK	KVAVVLIQK
242	SVSTHLITK	46.62	984.56	9	77.8	9	-1.5	493.287	2	15.5844	1.4991	0.86	773951	Neo_sh14_patient1_HLAI_0412_HM1114_tims_Slot1-36_1_3662.d	17519	0.8265	0.8361	0.0287			1	1	0	0			2 2 17 11 9 5 10 1 1	SVSTHLITK	Q8N2I2|ZN619_HUMAN	DB Search	SVSTHLITK	SVSTHLITK
243	SVSNVVITK	39.9	945.549	9	44.4	9	-2.1	473.781	2	20.1309	-2.2026	0.9	1000907	Neo_sh14_patient1_HLAI_0412_HM1114_tims_Slot1-36_1_3662.d	24155	0.7777	0.7873	0.0375	4070	43700	2	2	1	1			1 1 6 6 8 6 0 0 0	SVSNVVITK	P42566|EPS15_HUMAN	DB Search	SVSNVVITK	SVSNVVITK
244	AVATKFVNK	42.75	976.571	9	100	9	1.2	489.293	2	13.168	0.3992	0.91	652813	Neo_sh14_patient1_HLAI_0412_HM1114_tims_Slot1-36_1_3662.d	13885	0.8257	0.8354	0.0195	3830	58300	2	2	1	1			5 10 50 36 32 6 7 4 4	AVATKFVNK	O75962|TRIO_HUMAN	DB Search	AVATKFVNK	AVATKFVNK
245	LPVHVFEAL	41.38	1023.58	9	88.9	9	-2.3	512.794	2	53.5958	-0.8944	0.9	2644866	Neo_sh14_patient1_HLAI_0412_HM1114_tims_Slot1-36_1_3662.d	54270	0.8389	0.8485	0.0263			1	1	0	0			5 6 5 0 54 55 55 48 5	LPVHVFEAL	Q9H4Z3|CAPAM_HUMAN	DB Search	LPVHVFEAL
246	VYDTVFKHF	38.78	1154.58	9	55.6	9	5.9	578.299	2	37.3934	2.953	0.72	1845805	Neo_sh14_patient1_HLAI_0412_HM1114_tims_Slot1-36_1_3662.d	41017	0.8935	0.9032	0.0416			1	1	0	0			5 22 53 29 0 0 15 0 0	VYDTVFKHF	Q9H930|SP14L_HUMAN	DB Search	VYDTVFKHF	VYDTVFKHF
247	GVADKILKK	42.64	970.617	9	77.8	9	0.2	486.316	2	16.0223	-12.8158	0.88	792821	Neo_sh14_patient1_HLAI_0412_HM1114_tims_Slot1-36_1_3662.d	18029	0.8187	0.8284	0.0364	28900	284000	3	3	1	1			1 1 30 26 13 8 21 7 5	GVADKILKK	Q13287|NMI_HUMAN	DB Search	GVADKILKK	GVADKILKK
248	QLIDIIHTA	36.35	1022.58	9	66.7	9	7.9	512.299	2	48.7888	-1.2264	0.67	2408650	Neo_sh14_patient1_HLAI_0412_HM1114_tims_Slot1-36_1_3662.d	51226	0.8315	0.8412	0.0337			2	2	0	0			5 7 15 2 2 14 0 0 0	QLIDIIHTA	Q9NXF1|TEX10_HUMAN	DB Search	QLIDIIHTA	QLIDIIHTA
249	RLFGRVLER	30.53	1144.68	9	77.8	9	0.6	382.568	3	21.3431	0.6771	0.52	1061322	Neo_sh14_patient1_HLAI_0412_HM1114_tims_Slot1-36_1_3662.d	25818	0.7061	0.7158	0.029	17500	181000	8	8	2	2			5 12 3 9 0 16 4 0 5	RLFGRVLER	Q92791|SC65_HUMAN	DB Search	RLFGRVLER	RLFGRVLER
250	NFDFTRSYL	28.14	1161.55	9	55.6	9	-10.8	581.774	2	50.1517	-1.2217	0.5	2475693	Neo_sh14_patient1_HLAI_0412_HM1114_tims_Slot1-36_1_3662.d	52173	0.8959	0.9056	0.0093			1	1	0	0			5 15 24 21 9 0 0 0 0	NFDFTRSYL	P55160|NCKPL_HUMAN	DB Search	NFDFTRSYL	NFDFTRSYL
251	RLWQTVVGK	36.97	1085.63	9	88.9	9	-5.1	543.822	2	24.1851	-3.7028	0.88	1203131	Neo_sh14_patient1_HLAI_0412_HM1114_tims_Slot1-36_1_3662.d	29927	0.8695	0.8792	0.0257			1	1	0	0			2 0 4 6 26 77 60 15 5	RLWQTVVGK	Q9Y3F4|STRAP_HUMAN	DB Search	RLWQTVVGK	RLWQTVVGK
252	TPTPFFHTF	15.97	1093.52	9	55.6	9	9.4	547.774	2	51.2113	1.0172	0.87	2527790	Neo_sh14_patient1_HLAI_0412_HM1114_tims_Slot1-36_1_3662.d	52862	0.8497	0.8594	0.0154			2	2	0	0			0 0 36 30 18 9 2 0 0	TPTPFFHTF	P42768|WASP_HUMAN	DB Search	TPTPFFHTF	TPTPFFHTF
253	RLAKNLVEK	34.08	1069.66	9	77.8	9	-1.1	535.837	2	8.9848	-2.1187	0.91	442049	Neo_sh14_patient1_HLAI_0412_HM1114_tims_Slot1-36_1_3662.d	6917	0.8714	0.8811	0.0337	479	11000	3	3	1	1			0 0 2 4 8 22 27 23 5	RLAKNLVEK	Q9H4A6|GOLP3_HUMAN	DB Search	RLAKNLVEK	RLAKNLVEK
254	KVYNIQIRY	39.27	1195.67	9	77.8	9	4.7	598.846	2	32.152	2.5785	0.88	1588621	Neo_sh14_patient1_HLAI_0412_HM1114_tims_Slot1-36_1_3662.d	35365	0.8966	0.9063	0.0385	540	7310	2	2	1	1			5 53 36 9 9 2 2 0 0	KVYNIQIRY	Q13094|LCP2_HUMAN	DB Search	KVYNIQIRY	KVYNIQIRY
255	DYDPLVVKL	48.14	1060.58	9	44.4	9	-1.5	531.297	2	53.9371	-1.7771	0.79	2661800	Neo_sh14_patient1_HLAI_0412_HM1114_tims_Slot1-36_1_3662.d	54680	0.8427	0.8524	0.0424			2	2	0	0			0 0 92 21 8 8 0 0 0	DYDPLVVKL	Q96A65|EXOC4_HUMAN	DB Search	DYDPLVVKL	DYDPLVVKL
256	RQMERILKK	19.66	1200.71	9	44.4	9	-2.8	401.244	3	7.7349	-1.4115	0.03	381313	Neo_sh14_patient1_HLAI_0412_HM1114_tims_Slot1-36_1_3662.d	4933	0.6872	0.6969	0.028			1	1	0	0			0 0 1 3 3 0 0 14 5	RQMERILKK	Q9Y421|FA32A_HUMAN	DB Search	RQMERILKK	RQMERILKK
257	VYDLSIRGF	28.04	1068.56	9	55.6	9	-14.9	535.279	2	50.3409	0.6473	0.93	2484997	Neo_sh14_patient1_HLAI_0412_HM1114_tims_Slot1-36_1_3662.d	52297	0.8815	0.8912	-0.0064			1	1	0	0			5 46 40 25 6 1 0 0 0	VYDLSIRGF	Q15631|TSN_HUMAN	DB Search	VYDLSIRGF	VYDLSIRGF
258	AFDLTKTNM	21.04	1039.5	9	44.4	9	17.3	520.767	2	35.8398	-3.4072	0.76	1768743	Neo_sh14_patient1_HLAI_0412_HM1114_tims_Slot1-36_1_3662.d	39231	0.847	0.8567	0.0082			1	1	0	0			0 0 26 26 80 14 0 0 0	AFDLTKTNM	Q86UY6|NAA40_HUMAN	DB Search	AFDLTKTNM	AFDLTKTNM
259	SFDVADRMF	19.77	1086.48	9	66.7	9	19.2	544.258	2	48.1832	0.2803	0.88	2378795	Neo_sh14_patient1_HLAI_0412_HM1114_tims_Slot1-36_1_3662.d	50747	0.8435	0.8532	0.0316			1	1	0	0			5 6 37 37 6 6 0 0 0	SFDVADRMF	Q6ZS81|WDFY4_HUMAN	DB Search	SFDVADRMF	SFDVADRMF
260	AFDVAEKYL	40.87	1054.53	9	77.8	9	4.2	528.276	2	45.9884	1.186	0.67	2270591	Neo_sh14_patient1_HLAI_0412_HM1114_tims_Slot1-36_1_3662.d	49031	0.8361	0.8458	0.039			1	1	0	0			5 9 80 70 61 6 3 0 0	AFDVAEKYL	P12814|ACTN1_HUMAN	DB Search	AFDVAEKYL	AFDVAEKYL
261	RLSPHVLGH	45.48	1014.57	9	77.8	9	-0.5	508.293	2	15.433	2.957	0.73	766405	Neo_sh14_patient1_HLAI_0412_HM1114_tims_Slot1-36_1_3662.d	17317	0.8551	0.8648	0.01			1	1	0	0			0 0 3 13 13 55 31 31 5	RLSPHVLGH	Q3MIP1|IPIL2_HUMAN	DB Search	RLSPHVLGH	RLSPHVLGH
262	LPSHVVTM(+15.99)L	9.95	1011.54	9	33.3	9	-4.6	506.776	2	35.3094	1.5917	0.25	1742402	Neo_sh14_patient1_HLAI_0412_HM1114_tims_Slot1-36_1_3662.d	38594	0.8152	0.8249	0.0399			1	1	0	0	Oxidation (M)	M8:Oxidation (M):1000.00	0 0 0 0 7 0 0 12 5	LPSHVVTM(+15.99)L	O75390|CISY_HUMAN	DB Search	LPSHVVTML	LPSHVVTML
263	KIADRFLLY	41.7	1137.65	9	100	9	1.2	569.835	2	42.7375	0.904	0.81	2106431	Neo_sh14_patient1_HLAI_0412_HM1114_tims_Slot1-36_1_3662.d	46439	0.8815	0.8912	0.0336	281000	1920000	11	11	1	1			5 57 14 12 2 2 4 16 5	KIADRFLLY	P61968|LMO4_HUMAN	DB Search	KIADRFLLY	KIADRFLLY
264	KVANIILSY	36.15	1019.6	9	66.7	9	-0.6	510.808	2	43.831	-0.1538	0.9	2164183	Neo_sh14_patient1_HLAI_0412_HM1114_tims_Slot1-36_1_3662.d	47275	0.8098	0.8195	0.0554	17500	144000	6	6	1	1			0 0 0 5 5 79 50 23 5	KVANIILSY	Q96JI7|SPTCS_HUMAN	DB Search	KVANIILSY	KVANIILSY
265	AFDLAYRKF	37.27	1129.59	9	77.8	9	-12.7	565.796	2	38.0754	0.3377	0.89	1879653	Neo_sh14_patient1_HLAI_0412_HM1114_tims_Slot1-36_1_3662.d	41817	0.9009	0.9106	0.0242			1	1	0	0			5 7 69 69 27 3 3 0 0	AFDLAYRKF	Q9UBP9|GULP1_HUMAN	DB Search	AFDLAYRKF
266	HIKTETVTY	44.48	1090.57	9	77.8	9	0.8	546.291	2	15.8637	-0.0219	0.84	785248	Neo_sh14_patient1_HLAI_0412_HM1114_tims_Slot1-36_1_3662.d	17800	0.89	0.8997	0.0051	886	13000	1	1	1	1			0 0 4 4 6 20 96 15 5	HIKTETVTY	O60296|TRAK2_HUMAN	DB Search	HIKTETVTY	HIKTETVTY
267	AVYVPFWQK	36.01	1136.6	9	44.4	9	0.9	569.309	2	51.4762	0.2454	0.94	2540770	Neo_sh14_patient1_HLAI_0412_HM1114_tims_Slot1-36_1_3662.d	52990	0.8439	0.8536	0.0613			2	2	0	0			0 0 16 16 3 3 0 0 0	AVYVPFWQK	Q15361|TTF1_HUMAN	DB Search	AVYVPFWQK	AVYVPFWQK
268	RVKIPLRYK	21.91	1171.76	9	44.4	9	3.2	391.594	3	17.0615	0.9297	0.85	847684	Neo_sh14_patient1_HLAI_0412_HM1114_tims_Slot1-36_1_3662.d	19648	0.7193	0.7289	0.0359			1	1	0	0			0 0 2 3 19 4 0 0 0	RVKIPLRYK	P30542|AA1R_HUMAN	DB Search	RVKIPLRYK
269	HAVHVALVL	28.33	957.576	9	55.6	9	0.1	479.795	2	38.0754	5.4554	0.62	1879649	Neo_sh14_patient1_HLAI_0412_HM1114_tims_Slot1-36_1_3662.d	41813	0.8389	0.8485	0.0163			1	1	0	0			0 0 7 17 11 11 12 0 0	HAVHVALVL	Q8N1F7|NUP93_HUMAN	DB Search	HAVHVALVL	HAVHVALVL
270	ALFLTLTTK	37.99	1006.61	9	77.8	9	0.3	504.311	2	50.5301	0.4076	0.78	2494322	Neo_sh14_patient1_HLAI_0412_HM1114_tims_Slot1-36_1_3662.d	52442	0.8381	0.8478	0.0271			2	2	0	0			5 9 51 59 39 30 5 0 0	ALFLTLTTK	P00403|COX2_HUMAN	DB Search	ALFLTLTTK	ALFLTLTTK
271	RLNSHLIQH	38.44	1116.62	9	66.7	9	-8.5	373.209	3	11.7164	0.6886	0.87	580685	Neo_sh14_patient1_HLAI_0412_HM1114_tims_Slot1-36_1_3662.d	11525	0.7104	0.72	0.0048	548	9830	2	2	1	1			5 0 2 25 83 6 4 0 0	RLNSHLIQH	Q8N720|ZN655_HUMAN	DB Search	RLNSHLIQH	RLNSHLIQH
272	KVFQEPLFY	43.28	1169.61	9	55.6	9	-1.4	585.812	2	49.6596	-0.4271	0.86	2451470	Neo_sh14_patient1_HLAI_0412_HM1114_tims_Slot1-36_1_3662.d	51818	0.8966	0.9063	0.0285			1	1	0	0			0 0 0 0 10 5 5 14 5	KVFQEPLFY	P07711|CATL1_HUMAN	DB Search	KVFQEPLFY	KVFQEPLFY
273	ALFSKVLER	41.18	1061.62	9	55.6	9	5.9	531.822	2	33.7168	1.454	0.89	1663603	Neo_sh14_patient1_HLAI_0412_HM1114_tims_Slot1-36_1_3662.d	36907	0.8815	0.8912	0.0336			2	2	0	0			1 1 65 36 34 13 2 0 0	ALFSKVLER	Q03001|DYST_HUMAN	DB Search	ALFSKVLER	ALFSKVLER
274	STSQTFIYK	32.63	1073.54	9	77.8	9	-0.8	537.776	2	22.6316	-0.2351	0.85	1123627	Neo_sh14_patient1_HLAI_0412_HM1114_tims_Slot1-36_1_3662.d	27535	0.84	0.8497	0.0351	506	7680	2	2	1	1			5 10 49 49 27 8 2 0 0	STSQTFIYK	O60341|KDM1A_HUMAN	DB Search	STSQTFIYK	STSQTFIYK
275	KLLPKILAH	27.46	1031.69	9	77.8	9	4.2	516.852	2	24.2229	1.3561	0.78	1205011	Neo_sh14_patient1_HLAI_0412_HM1114_tims_Slot1-36_1_3662.d	29971	0.8718	0.8815	0.0133			1	1	0	0			5 22 63 24 0 1 10 10 5	KLLPKILAH	Q9UPU9|SMAG1_HUMAN	DB Search	KLLPKILAH	KLLPKILAH
276	RILNHVLQH	38.69	1128.65	9	77.8	9	3.2	565.335	2	15.5466	0.5463	0.72	772044	Neo_sh14_patient1_HLAI_0412_HM1114_tims_Slot1-36_1_3662.d	17448	0.9013	0.911	0.0139			1	1	0	0			5 0 0 6 36 62 62 68 5	RILNHVLQH	P21964|COMT_HUMAN	DB Search	RILNHVLQH	RILNHVLQH
277	RM(+15.99)NKRQLYY	10.84	1286.66	9	22.2	9	-9.5	429.888	3	9.5925	-8.1306	0.09	474309	Neo_sh14_patient1_HLAI_0412_HM1114_tims_Slot1-36_1_3662.d	7965	0.7108	0.7204	0.0444			1	1	0	0	Oxidation (M)	M2:Oxidation (M):1000.00	0 0 0 0 0 0 0 35 5	RM(+15.99)NKRQLYY	P67812|SC11A_HUMAN	DB Search	RMNKRQLYY	RMNKRQLYY
278	RMYHRVLVH	32.33	1209.66	9	44.4	9	8.3	404.229	3	9.5546	-1.6757	0.09	472391	Neo_sh14_patient1_HLAI_0412_HM1114_tims_Slot1-36_1_3662.d	7883	0.7011	0.7108	0.0341			1	1	0	0			1 0 0 3 6 0 0 32 5	RMYHRVLVH	Q5H9U9|DDX6L_HUMAN	DB Search	RMYHRVLVH	RMYHRVLVH
279	SLYAHPIEH	40.52	1065.52	9	88.9	9	5.8	533.773	2	17.4025	-3.8126	0.8	864726	Neo_sh14_patient1_HLAI_0412_HM1114_tims_Slot1-36_1_3662.d	20166	0.8687	0.8784	0.0064			1	1	0	0			2 2 4 4 31 2 2 0 5	SLYAHPIEH	Q96IV6|FXDC2_HUMAN	DB Search	SLYAHPIEH	SLYAHPIEH
280	KM(+15.99)NKRQLYY	23.88	1258.65	9	66.7	9	3.4	630.334	2	9.2892	-8.6807	0.5	459129	Neo_sh14_patient1_HLAI_0412_HM1114_tims_Slot1-36_1_3662.d	7473	0.9087	0.9184	0.0365			2	2	0	0	Oxidation (M)	M2:Oxidation (M):1000.00	5 8 19 6 0 4 0 0 5	KM(+15.99)NKRQLYY	Q9BY50|SC11C_HUMAN	DB Search	KMNKRQLYY	KMNKRQLYY
281	KLATTILQH	33.12	1023.61	9	55.6	9	-3.4	512.809	2	22.0883	0.1591	0.68	1097175	Neo_sh14_patient1_HLAI_0412_HM1114_tims_Slot1-36_1_3662.d	26787	0.8509	0.8606	0.0343	189	3210	1	1	1	1			5 30 3 1 1 4 26 0 0	KLATTILQH	P78527|PRKDC_HUMAN	DB Search	KLATTILQH	KLATTILQH
282	KTLDHVLTH	56.89	1062.58	9	100	9	2.1	532.299	2	13.7161	-0.7114	0.91	679365	Neo_sh14_patient1_HLAI_0412_HM1114_tims_Slot1-36_1_3662.d	14733	0.8575	0.8672	0.0277	15300	197000	3	3	1	1			5 87 77 71 30 67 57 50 5	KTLDHVLTH	Q9BTW9|TBCD_HUMAN	DB Search	KTLDHVLTH	KTLDHVLTH
283	QLYSTILSH	42.37	1060.56	9	77.8	9	2.4	531.286	2	38.3406	0.7813	0.77	1892772	Neo_sh14_patient1_HLAI_0412_HM1114_tims_Slot1-36_1_3662.d	42084	0.8772	0.8869	0.0079			1	1	0	0			5 18 99 21 21 25 25 0 0	QLYSTILSH	Q9Y4H4|GPSM3_HUMAN	DB Search	QLYSTILSH	QLYSTILSH
284	RLASKVISH	40.27	1009.6	9	55.6	9	0.9	337.542	3	8.9101	-1.4465	0.68	440156	Neo_sh14_patient1_HLAI_0412_HM1114_tims_Slot1-36_1_3662.d	6860	0.6609	0.6706	0.0342	1590	32200	4	4	1	1			1 1 3 17 56 31 31 0 0	RLASKVISH	Q6YHU6|THADA_HUMAN	DB Search	RLASKVISH	RLASKVISH
285	RLKDGVLAY	37.45	1033.59	9	66.7	9	2.6	517.805	2	23.1349	-0.8433	0.88	1146329	Neo_sh14_patient1_HLAI_0412_HM1114_tims_Slot1-36_1_3662.d	28205	0.8578	0.8675	0.0273	4170	40100	2	2	1	1			0 0 0 6 18 18 48 33 5	RLKDGVLAY	Q14690|RRP5_HUMAN	DB Search	RLKDGVLAY	RLKDGVLAY
286	RLSDTLLFY	41.15	1126.6	9	55.6	9	4.9	564.311	2	53.8613	0.0931	0.88	2658010	Neo_sh14_patient1_HLAI_0412_HM1114_tims_Slot1-36_1_3662.d	54562	0.8734	0.8831	0.0418			2	2	0	0			0 0 0 0 13 13 61 14 5	RLSDTLLFY	Q6ZPD9|D19L3_HUMAN	DB Search	RLSDTLLFY	RLSDTLLFY
287	ALNHKVLHY	49.15	1093.6	9	77.8	9	1.2	547.81	2	14.0275	-0.2436	0.7	692618	Neo_sh14_patient1_HLAI_0412_HM1114_tims_Slot1-36_1_3662.d	15134	0.8765	0.8862	0.0287	16700	199000	4	4	1	1			0 0 100 81 32 37 37 38 5	ALNHKVLHY	Q96JJ3|ELMO2_HUMAN	DB Search	ALNHKVLHY	ALNHKVLHY
288	RM(+15.99)LETFLTY	9.83	1188.58	9	22.2	9	-13	595.292	2	46.0262	-2.311	0.82	2272450	Neo_sh14_patient1_HLAI_0412_HM1114_tims_Slot1-36_1_3662.d	49054	0.9005	0.9102	0.0246			1	1	0	0	Oxidation (M)	M2:Oxidation (M):1000.00	0 0 0 0 0 25 48 0 0	RM(+15.99)LETFLTY	O14827|RGRF2_HUMAN	DB Search	RMLETFLTY	RMLETFLTY
289	RVAELILHH	51.23	1086.63	9	44.4	9	-5.9	363.215	3	20.9643	0.7396	0.88	1042410	Neo_sh14_patient1_HLAI_0412_HM1114_tims_Slot1-36_1_3662.d	25266	0.6814	0.6911	0.0238	414	6570	3	3	1	1			0 0 0 14 53 13 7 0 0	RVAELILHH	Q7Z695|ADCK2_HUMAN	DB Search	RVAELILHH	RVAELILHH
290	RVHAYIISY	32.45	1120.6	9	66.7	9	5.5	561.312	2	31.6601	2.0867	0.92	1564329	Neo_sh14_patient1_HLAI_0412_HM1114_tims_Slot1-36_1_3662.d	34941	0.8865	0.8962	0.0186			1	1	0	0			0 0 0 2 38 91 33 12 5	RVHAYIISY	Q9NZN4|EHD2_HUMAN	DB Search	RVHAYIISY	RVHAYIISY
291	KVSDYILQH	49.12	1101.58	9	100	9	2.4	551.799	2	24.3045	1.1105	0.74	1206899	Neo_sh14_patient1_HLAI_0412_HM1114_tims_Slot1-36_1_3662.d	30023	0.8722	0.8819	0.023	457	6960	1	1	1	1			5 9 12 9 9 11 23 5 5	KVSDYILQH	O75129|ASTN2_HUMAN	DB Search	KVSDYILQH	KVSDYILQH
292	KLHDETLTY	36.54	1118.56	9	44.4	9	-1.3	560.287	2	19.3865	-1.8286	0.82	961201	Neo_sh14_patient1_HLAI_0412_HM1114_tims_Slot1-36_1_3662.d	23005	0.8889	0.8986	0.0163	2830	29400	2	2	1	1			0 0 0 5 0 0 64 30 5	KLHDETLTY	Q9NZI7|UBIP1_HUMAN:Q12800|TFCP2_HUMAN	DB Search	KLHDETLTY	KLHDETLTY
293	RLAGM(+15.99)TLTY	23.1	1040.53	9	55.6	9	2.6	521.275	2	24.6021	-4.5815	0.83	1224101	Neo_sh14_patient1_HLAI_0412_HM1114_tims_Slot1-36_1_3662.d	30701	0.8396	0.8493	0.0255			1	1	0	0	Oxidation (M)	M5:Oxidation (M):1000.00	0 0 0 0 8 28 51 23 5	RLAGM(+15.99)TLTY	P29558|RBMS1_HUMAN	DB Search	RLAGMTLTY	RLAGMTLTY
294	RTAHVILRY	53.32	1127.66	9	44.4	9	3.7	376.894	3	17.2131	0.7723	0.87	855269	Neo_sh14_patient1_HLAI_0412_HM1114_tims_Slot1-36_1_3662.d	19889	0.7413	0.751	0.0139	30900	325000	7	7	2	2			0 0 1 31 57 29 4 0 0	RTAHVILRY	Q9UKV5|AMFR_HUMAN	DB Search	RTAHVILRY	RTAHVILRY
295	RLAEVALAY	30.07	1004.57	9	55.6	9	0.4	503.29	2	39.8557	-1.265	0.93	1967861	Neo_sh14_patient1_HLAI_0412_HM1114_tims_Slot1-36_1_3662.d	43733	0.8462	0.8559	0.0189			1	1	0	0			0 0 0 0 12 22 56 37 5	RLAEVALAY	P13716|HEM2_HUMAN	DB Search	RLAEVALAY	RLAEVALAY
296	KLHEETLTY	28.84	1132.58	9	44.4	9	12.4	567.302	2	19.752	-0.1185	0.82	981985	Neo_sh14_patient1_HLAI_0412_HM1114_tims_Slot1-36_1_3662.d	23593	0.9017	0.9114	0.0035			1	1	0	0			0 0 0 0 0 14 78 27 5	KLHEETLTY	Q9NZI6|TF2L1_HUMAN	DB Search	KLHEETLTY	KLHEETLTY
297	KLNTLILRH	24.52	1106.69	9	66.7	9	2.8	554.355	2	21.0249	2.2714	0.89	1042402	Neo_sh14_patient1_HLAI_0412_HM1114_tims_Slot1-36_1_3662.d	25258	0.8889	0.8986	0.0263	2140	21100	1	1	1	1			5 62 25 22 17 0 0 0 5	KLNTLILRH	Q86SJ2|AMGO2_HUMAN	DB Search	KLNTLILRH	KLNTLILRH
298	RSDTPLIYK	35.98	1091.6	9	44.4	9	2.4	546.807	2	19.4331	0.8692	0.93	963102	Neo_sh14_patient1_HLAI_0412_HM1114_tims_Slot1-36_1_3662.d	23070	0.8819	0.8916	0.0133	10400	96600	2	2	1	1			1 0 0 14 0 0 77 15 5	RSDTPLIYK	P41252|SYIC_HUMAN	DB Search	RSDTPLIYK	RSDTPLIYK
299	M(+15.99)QRATNVTY	19.58	1098.51	9	33.3	9	5.6	550.267	2	13.8416	-1.3762	0.89	686957	Neo_sh14_patient1_HLAI_0412_HM1114_tims_Slot1-36_1_3662.d	14981	0.8334	0.8431	0.0417			2	2	0	0	Oxidation (M)	M1:Oxidation (M):1000.00	0 0 1 0 0 0 72 33 5	M(+15.99)QRATNVTY	O43252|PAPS1_HUMAN	DB Search	MQRATNVTY
300	SLSSHLLSH	25.32	979.509	9	44.4	9	1.7	490.762	2	20.8505	1.2357	0.72	1034866	Neo_sh14_patient1_HLAI_0412_HM1114_tims_Slot1-36_1_3662.d	25066	0.8354	0.8451	-0.0002	638	10200	2	2	1	1			0 0 5 5 13 17 0 0 0	SLSSHLLSH	Q5TEC3|ZN697_HUMAN	DB Search	SLSSHLLSH	SLSSHLLSH
301	KVADM(+15.99)ALHY	27.69	1062.52	9	55.6	9	0.5	532.266	2	18.0468	1.2072	0.61	896984	Neo_sh14_patient1_HLAI_0412_HM1114_tims_Slot1-36_1_3662.d	21212	0.8435	0.8532	0.0316			2	2	0	0	Oxidation (M)	M5:Oxidation (M):1000.00	5 17 0 0 0 9 11 0 3	KVADM(+15.99)ALHY	P50990|TCPQ_HUMAN	DB Search	KVADMALHY	KVADMALHY
302	SVAEHPLSR	33.91	994.52	9	55.6	9	5.2	498.27	2	10.7676	-1.358	0.89	533174	Neo_sh14_patient1_HLAI_0412_HM1114_tims_Slot1-36_1_3662.d	9914	0.8222	0.8319	0.023			1	1	0	0			2 2 38 38 53 0 0 0 0	SVAEHPLSR	O60287|NPA1P_HUMAN	DB Search	SVAEHPLSR	SVAEHPLSR
303	KTSDM(+15.99)VLKR	12.04	1092.6	9	44.4	9	2.2	547.307	2	5.0432	-3.0305	0.74	247478	Neo_sh14_patient1_HLAI_0412_HM1114_tims_Slot1-36_1_3662.d	1454	0.8683	0.878	0.0168			2	2	0	0	Oxidation (M)	M5:Oxidation (M):1000.00	5 42 0 0 5 5 0 0 0	KTSDM(+15.99)VLKR	Q96IY1|NSL1_HUMAN	DB Search	KTSDMVLKR	KTSDMVLKR
304	AMHGVFLYH	33.93	1073.51	9	44.4	9	-2.3	537.762	2	30.7138	1.1404	0.62	1517639	Neo_sh14_patient1_HLAI_0412_HM1114_tims_Slot1-36_1_3662.d	34151	0.8664	0.8761	0.0188			2	2	0	0			0 0 82 30 18 35 0 0 0	AMHGVFLYH	Q99707|METH_HUMAN	DB Search	AMHGVFLYH	AMHGVFLYH
305	RTTSHLLRY	41.19	1145.63	9	44.4	9	-2.2	382.883	3	13.614	-2.0893	0.79	675625	Neo_sh14_patient1_HLAI_0412_HM1114_tims_Slot1-36_1_3662.d	14665	0.7212	0.7309	0.034	1370	24100	3	3	1	1			0 0 0 7 22 33 6 0 0	RTTSHLLRY	Q03164|KMT2A_HUMAN	DB Search	RTTSHLLRY	RTTSHLLRY
306	RQYDKFLTH	43.75	1206.61	9	44.4	9	5.6	403.214	3	17.251	0.0758	0.83	857159	Neo_sh14_patient1_HLAI_0412_HM1114_tims_Slot1-36_1_3662.d	19943	0.6872	0.6969	0.048	473	8480	2	2	1	1			0 0 11 17 59 30 0 0 0	RQYDKFLTH	Q7Z6M2|FBX33_HUMAN	DB Search	RQYDKFLTH	RQYDKFLTH
307	KTSNLLLSH	45.79	1011.57	9	100	9	-0.1	506.793	2	18.9565	2.6082	0.8	942333	Neo_sh14_patient1_HLAI_0412_HM1114_tims_Slot1-36_1_3662.d	22497	0.8354	0.8451	0.0298	967	12300	2	2	1	1			5 77 6 6 12 31 17 2 2	KTSNLLLSH	Q9UQ88|CD11A_HUMAN:P21127|CD11B_HUMAN	DB Search	KTSNLLLSH	KTSNLLLSH
308	KTNGKFLIR	43.73	1075.65	9	77.8	9	5.4	359.559	3	13.2727	0.8841	0.84	658534	Neo_sh14_patient1_HLAI_0412_HM1114_tims_Slot1-36_1_3662.d	14098	0.7019	0.7115	0.0233	1600	22600	2	2	1	1			4 4 9 14 14 29 7 0 0	KTNGKFLIR	P43405|KSYK_HUMAN	DB Search	KTNGKFLIR	KTNGKFLIR
309	AMADTFLEH	34.09	1033.45	9	77.8	9	-1.3	517.734	2	36.0672	-2.693	0.87	1780018	Neo_sh14_patient1_HLAI_0412_HM1114_tims_Slot1-36_1_3662.d	39490	0.8423	0.852	0.0228			1	1	0	0			5 19 61 26 12 12 6 0 0	AMADTFLEH	P14618|KPYM_HUMAN:P30613|KPYR_HUMAN	DB Search	AMADTFLEH	AMADTFLEH
310	RAAEHTLLH	22.84	1046.56	9	55.6	9	9.9	524.294	2	8.8722	0.0766	0.72	438261	Neo_sh14_patient1_HLAI_0412_HM1114_tims_Slot1-36_1_3662.d	6801	0.8524	0.8621	0.0227			1	1	0	0			0 0 0 0 9 9 21 51 5	RAAEHTLLH	Q9BYK8|HELZ2_HUMAN	DB Search	RAAEHTLLH	RAAEHTLLH
311	GVSSIFIYH	29.3	1021.52	9	55.6	9	12.8	511.775	2	45.8369	0.9498	0.76	2263111	Neo_sh14_patient1_HLAI_0412_HM1114_tims_Slot1-36_1_3662.d	48895	0.8172	0.8268	0.048			1	1	0	0			0 0 45 45 83 61 19 0 0	GVSSIFIYH	P33076|C2TA_HUMAN	DB Search	GVSSIFIYH	GVSSIFIYH
312	GLTDVILYH	30.3	1029.55	9	55.6	9	0.8	515.782	2	49.9246	0.1239	0.7	2464531	Neo_sh14_patient1_HLAI_0412_HM1114_tims_Slot1-36_1_3662.d	52027	0.8528	0.8625	0.0223			1	1	0	0			0 0 46 16 16 43 43 0 0	GLTDVILYH	O60506|HNRPQ_HUMAN	DB Search	GLTDVILYH	GLTDVILYH
313	QMSERFLHH	28.61	1183.56	9	77.8	9	15.5	592.794	2	15.4708	2.8197	0.56	768290	Neo_sh14_patient1_HLAI_0412_HM1114_tims_Slot1-36_1_3662.d	17366	0.8931	0.9028	0.032			3	3	0	0			5 7 1 1 2 2 4 34 5	QMSERFLHH	Q9BQD3|KXDL1_HUMAN	DB Search	QMSERFLHH	QMSERFLHH
314	YAHPSGTAL	30.46	915.445	9	66.7	9	11	458.735	2	18.0847	0.9096	0.7	898861	Neo_sh14_patient1_HLAI_0412_HM1114_tims_Slot1-36_1_3662.d	21253	0.7788	0.7885	0.0263			1	1	0	0			3 0 3 5 0 0 21 63 5	YAHPSGTAL	Q8N556|AFAP1_HUMAN	DB Search	YAHPSGTAL	YAHPSGTAL
315	YSMPSTHAM	17.5	1023.42	9	55.6	9	13.2	512.722	2	24.5641	-1.3219	0.78	1222208	Neo_sh14_patient1_HLAI_0412_HM1114_tims_Slot1-36_1_3662.d	30644	0.835	0.8447	0.0102	1510	24400	2	2	1	1			3 3 7 7 2 0 0 0 0	YSMPSTHAM	Q9BX95|SGPP1_HUMAN	DB Search	YSMPSTHAM	YSMPSTHAM
316	KLIEEVHAV	27.07	1036.59	9	44.4	9	3.6	519.305	2	23.7303	0.3301	0.72	1180394	Neo_sh14_patient1_HLAI_0412_HM1114_tims_Slot1-36_1_3662.d	29222	0.8873	0.897	-0.0122			1	1	0	0			5 42 0 0 5 19 0 0 0	KLIEEVHAV	P53680|AP2S1_HUMAN	DB Search	KLIEEVHAV	KLIEEVHAV
317	ALLDRIVSV	33.88	984.597	9	100	9	1.4	493.306	2	52.4222	2.3712	0.79	2587154	Neo_sh14_patient1_HLAI_0412_HM1114_tims_Slot1-36_1_3662.d	53474	0.8315	0.8412	0.0337			2	2	0	0			5 15 28 5 3 7 7 7 5	ALLDRIVSV	Q92621|NU205_HUMAN	DB Search	ALLDRIVSV	ALLDRIVSV
318	LYDPVISKL	46.73	1046.6	9	77.8	9	0.7	524.308	2	47.4642	-2.2651	0.82	2343374	Neo_sh14_patient1_HLAI_0412_HM1114_tims_Slot1-36_1_3662.d	50210	0.8586	0.8683	0.0165			2	2	0	0			5 16 42 9 9 11 7 0 0	LYDPVISKL	Q96EZ8|MCRS1_HUMAN	DB Search	LYDPVISKL	LYDPVISKL
319	YPHQVPLVL	31.72	1064.6	9	66.7	9	-0.5	533.308	2	48.4859	1.1012	0.85	2393714	Neo_sh14_patient1_HLAI_0412_HM1114_tims_Slot1-36_1_3662.d	50978	0.8489	0.8586	0.0262	711	8430	2	2	1	1			0 0 0 8 18 12 12 18 5	YPHQVPLVL	Q14997|PSME4_HUMAN	DB Search	YPHQVPLVL	YPHQVPLVL
320	FSHEVGSEL	25.92	1003.46	9	77.8	9	4.7	502.74	2	23.7303	-1.4015	0.74	1180419	Neo_sh14_patient1_HLAI_0412_HM1114_tims_Slot1-36_1_3662.d	29247	0.8265	0.8361	0.0187			1	1	0	0			5 0 0 28 46 16 16 25 5	FSHEVGSEL	Q8IWR0|Z3H7A_HUMAN	DB Search	FSHEVGSEL	FSHEVGSEL
321	KLLEKLYKV	34.68	1132.72	9	77.8	9	-1.3	567.367	2	24.5641	0.052	0.79	1222173	Neo_sh14_patient1_HLAI_0412_HM1114_tims_Slot1-36_1_3662.d	30609	0.9017	0.9114	0.0335			1	1	0	0			5 47 27 18 17 17 23 0 0	KLLEKLYKV	Q15034|HERC3_HUMAN	DB Search	KLLEKLYKV	KLLEKLYKV
322	FPELTSHTM	32.96	1061.49	9	22.2	9	-0.9	531.749	2	37.6966	-0.1303	0.76	1860880	Neo_sh14_patient1_HLAI_0412_HM1114_tims_Slot1-36_1_3662.d	41404	0.8447	0.8544	0.0105			1	1	0	0			2 2 1 1 1 1 1 0 0	FPELTSHTM	Q8N2Y8|RUSC2_HUMAN	DB Search	FPELTSHTM	FPELTSHTM
323	FSVPGGHNL	25.08	926.461	9	66.7	9	-0.5	464.238	2	34.589	-1.0949	0.92	1706776	Neo_sh14_patient1_HLAI_0412_HM1114_tims_Slot1-36_1_3662.d	37852	0.7858	0.7955	0.0094			1	1	0	0			5 2 2 11 3 3 0 0 0	FSVPGGHNL	Q96PP9|GBP4_HUMAN	DB Search	FSVPGGHNL	FSVPGGHNL
324	SAIPHPLIM	45.1	977.537	9	77.8	9	9.8	489.78	2	45.9505	1.4033	0.85	2268716	Neo_sh14_patient1_HLAI_0412_HM1114_tims_Slot1-36_1_3662.d	48992	0.8052	0.8148	0.03			3	3	0	0			0 0 59 28 28 4 4 26 5	SAIPHPLIM	P61201|CSN2_HUMAN	DB Search	SAIPHPLIM	SAIPHPLIM
325	YPTPYPDEL	26.28	1093.5	9	77.8	9	1.4	547.756	2	47.5209	-1.8516	0.56	2343375	Neo_sh14_patient1_HLAI_0412_HM1114_tims_Slot1-36_1_3662.d	50211	0.8408	0.8505	0.0244	893	10300	2	2	1	1			0 0 3 3 6 7 7 31 5	YPTPYPDEL	Q96RT1|ERBIN_HUMAN	DB Search	YPTPYPDEL	YPTPYPDEL
326	HPADM(+15.99)QLVL	30.69	1038.52	9	66.7	9	3.6	520.268	2	32.8335	0.6219	0.89	1622322	Neo_sh14_patient1_HLAI_0412_HM1114_tims_Slot1-36_1_3662.d	36018	0.8152	0.8249	0.0599			2	2	0	0	Oxidation (M)	M5:Oxidation (M):1000.00	0 0 0 2 2 30 55 8 5	HPADM(+15.99)QLVL	Q9NQT8|KI13B_HUMAN	DB Search	HPADMQLVL	HPADMQLVL
327	KLYEEPLSK	45.99	1105.6	9	100	9	3.6	553.81	2	18.9148	0.0979	0.87	938538	Neo_sh14_patient1_HLAI_0412_HM1114_tims_Slot1-36_1_3662.d	22374	0.8761	0.8858	0.0291	952	16400	2	2	1	1			5 69 18 18 25 3 3 9 5	KLYEEPLSK	Q13535|ATR_HUMAN	DB Search	KLYEEPLSK	KLYEEPLSK
328	KVYGPGVAK	43.9	917.533	9	100	9	5.3	459.776	2	10.3528	0.0987	0.92	512206	Neo_sh14_patient1_HLAI_0412_HM1114_tims_Slot1-36_1_3662.d	9142	0.78	0.7897	0.0452	2850	35100	3	3	1	1			5 43 38 27 4 9 9 6 5	KVYGPGVAK	P21333|FLNA_HUMAN	DB Search	KVYGPGVAK	KVYGPGVAK
329	FPVSKTLVL	21.18	1002.61	9	66.7	9	4.2	502.315	2	49.1766	0.983	0.6	2423540	Neo_sh14_patient1_HLAI_0412_HM1114_tims_Slot1-36_1_3662.d	51428	0.8334	0.8431	0.0317	532	4170	3	3	1	1			5 17 17 7 0 9 30 0 0	FPVSKTLVL	Q5UIP0|RIF1_HUMAN	DB Search	FPVSKTLVL	FPVSKTLVL
330	HPQPGAVEL	32.94	946.487	9	55.6	9	-6.5	474.248	2	23.7841	-6.2756	0.89	1182271	Neo_sh14_patient1_HLAI_0412_HM1114_tims_Slot1-36_1_3662.d	29263	0.787	0.7966	0.0482	5090	43800	3	3	1	1			0 0 4 0 0 27 86 34 5	HPQPGAVEL	P27708|PYR1_HUMAN	DB Search	HPQPGAVEL	HPQPGAVEL
331	KIYGRALEK	21.7	1076.63	9	55.6	9	0.2	539.324	2	10.0472	-2.7809	0.9	497058	Neo_sh14_patient1_HLAI_0412_HM1114_tims_Slot1-36_1_3662.d	8682	0.8648	0.8745	0.0303			1	1	0	0			5 57 14 0 0 0 0 2 5	KIYGRALEK	Q9BVV7|TIM21_HUMAN	DB Search	KIYGRALEK	KIYGRALEK
332	KLIDDVHRL	45.11	1107.64	9	66.7	9	0.5	554.828	2	23.9042	0.8044	0.9	1186036	Neo_sh14_patient1_HLAI_0412_HM1114_tims_Slot1-36_1_3662.d	29356	0.8819	0.8916	0.0133	2580	27400	3	3	1	1			5 67 80 30 12 9 1 0 0	KLIDDVHRL	P08240|SRPRA_HUMAN	DB Search	KLIDDVHRL	KLIDDVHRL
333	ALQEM(+15.99)VHQV	35.84	1069.52	9	55.6	9	1.7	535.769	2	19.4706	-0.3677	0.71	966883	Neo_sh14_patient1_HLAI_0412_HM1114_tims_Slot1-36_1_3662.d	23179	0.8485	0.8582	0.0266	180	4140	1	1	1	1	Oxidation (M)	M5:Oxidation (M):1000.00	0 0 48 29 29 35 7 0 0	ALQEM(+15.99)VHQV	Q14511|CASL_HUMAN	DB Search	ALQEMVHQV	ALQEMVHQV
334	MPTKTIEVL	28.05	1030.57	9	55.6	9	2.8	516.295	2	38.9847	-5.0001	0.73	1924718	Neo_sh14_patient1_HLAI_0412_HM1114_tims_Slot1-36_1_3662.d	42818	0.8551	0.8648	0.01			3	3	0	0			5 0 0 4 9 9 9 0 0	MPTKTIEVL	Q96GC5|RM48_HUMAN	DB Search	MPTKTIEVL	MPTKTIEVL
335	VPVPHTTAL	27.15	933.528	9	66.7	9	0.7	467.772	2	30.9409	3.7859	0.89	1528865	Neo_sh14_patient1_HLAI_0412_HM1114_tims_Slot1-36_1_3662.d	34361	0.7815	0.7912	0.0436			2	2	0	0			5 29 29 19 11 0 0 0 5	VPVPHTTAL	P15291|B4GT1_HUMAN	DB Search	VPVPHTTAL	VPVPHTTAL
336	HPNGNITEL	31.61	993.488	9	55.6	9	-3.1	497.75	2	22.1588	-0.8807	0.89	1097184	Neo_sh14_patient1_HLAI_0412_HM1114_tims_Slot1-36_1_3662.d	26796	0.8017	0.8114	0.0435	4130	30200	1	1	1	1			0 0 0 0 11 89 37 7 5	HPNGNITEL	Q7KZF4|SND1_HUMAN	DB Search	HPNGNITEL	HPNGNITEL
337	RLAQHLVQK	30.61	1091.66	9	55.6	9	1.9	546.836	2	9.2134	-1.403	0.87	455334	Neo_sh14_patient1_HLAI_0412_HM1114_tims_Slot1-36_1_3662.d	7350	0.8718	0.8815	0.0333			2	2	0	0			0 0 0 0 40 33 33 3 3	RLAQHLVQK	P0DPF3|NBPF9_HUMAN:Q3BBV0|NBPF1_HUMAN:Q5TI25|NBPFE_HUMAN:Q86T75|NBPFB_HUMAN:Q5TAG4|NBPFC_HUMAN:A0A087WUL8|NBPFJ_HUMAN:Q3BBV2|NBPF8_HUMAN:Q9H094|NBPF3_HUMAN:Q6P3W6|NBPFA_HUMAN:B4DH59|NBPFP_HUMAN	DB Search	RLAQHLVQK	RLAQHLVQK
338	ALFEHGLKK	43.12	1041.6	9	44.4	9	4.3	521.808	2	15.433	1.5941	0.88	766404	Neo_sh14_patient1_HLAI_0412_HM1114_tims_Slot1-36_1_3662.d	17316	0.8726	0.8823	0.0226			2	2	0	0			0 0 45 32 15 0 13 0 0	ALFEHGLKK	Q96HU1|SGSM3_HUMAN	DB Search	ALFEHGLKK	ALFEHGLKK
339	VLDDKLYVV	38.36	1062.6	9	77.8	9	3.9	532.307	2	45.7755	-0.4103	0.8	2257496	Neo_sh14_patient1_HLAI_0412_HM1114_tims_Slot1-36_1_3662.d	48788	0.8466	0.8563	0.0485	1690	22200	2	2	1	1			5 19 7 6 8 22 71 0 0	VLDDKLYVV	Q96PQ7|KLHL5_HUMAN	DB Search	VLDDKLYVV	VLDDKLYVV
340	ALDEVFTKV	44.87	1020.55	9	88.9	9	-0.7	511.281	2	44.3705	-1.607	0.86	2188453	Neo_sh14_patient1_HLAI_0412_HM1114_tims_Slot1-36_1_3662.d	47677	0.8203	0.8299	0.0349	416	6680	2	2	1	1			5 10 39 19 19 3 0 5 5	ALDEVFTKV	Q9UMX5|NENF_HUMAN	DB Search	ALDEVFTKV	ALDEVFTKV
341	ATYSVGMQK	28.72	983.475	9	44.4	9	-0.6	492.744	2	17.1373	-4.0171	0.73	851461	Neo_sh14_patient1_HLAI_0412_HM1114_tims_Slot1-36_1_3662.d	19753	0.8106	0.8203	0.0246			1	1	0	0			4 4 83 0 0 5 0 0 0	ATYSVGMQK	A8MT19|RHN2P_HUMAN:Q8IUC4|RHPN2_HUMAN	DB Search	ATYSVGMQK	ATYSVGMQK
342	LPNFGSHVL	43.93	982.524	9	100	9	13.9	492.276	2	44.9286	2.3762	0.83	2218260	Neo_sh14_patient1_HLAI_0412_HM1114_tims_Slot1-36_1_3662.d	48108	0.816	0.8257	0.0192			2	2	0	0			5 21 45 14 7 7 10 7 5	LPNFGSHVL	Q14C86|GAPD1_HUMAN	DB Search	LPNFGSHVL	LPNFGSHVL
343	RIFKHFTRK	29.68	1231.73	9	44.4	9	4.8	411.586	3	6.2169	-1.733	0.88	305280	Neo_sh14_patient1_HLAI_0412_HM1114_tims_Slot1-36_1_3662.d	2340	0.7166	0.7262	0.0286	238	3860	4	4	1	1			1 0 0 12 59 16 2 0 0	RIFKHFTRK	P24723|KPCL_HUMAN	DB Search	RIFKHFTRK	RIFKHFTRK
344	AIM(+15.99)DIVIKV	22.25	1016.59	9	55.6	9	0.6	509.305	2	48.8645	0.7431	0.74	2412371	Neo_sh14_patient1_HLAI_0412_HM1114_tims_Slot1-36_1_3662.d	51275	0.8272	0.8369	0.0379			1	1	0	0	Oxidation (M)	M3:Oxidation (M):1000.00	5 21 78 0 7 6 0 0 0	AIM(+15.99)DIVIKV	Q9NZJ5|E2AK3_HUMAN	DB Search	AIMDIVIKV	AIMDIVIKV
345	RVLERVLKK	24.79	1139.75	9	22.2	9	1.3	380.925	3	10.9194	-2.0283	0.33	540786	Neo_sh14_patient1_HLAI_0412_HM1114_tims_Slot1-36_1_3662.d	10182	0.6733	0.683	0.0419	523	9780	3	3	1	1			1 0 1 1 2 1 0 0 5	RVLERVLKK	Q96TA1|NIBA2_HUMAN	DB Search	RVLERVLKK	RVLERVLKK
346	YLNQHIEHV	40.5	1151.57	9	77.8	9	-1.8	576.792	2	19.2291	-0.3856	0.76	953671	Neo_sh14_patient1_HLAI_0412_HM1114_tims_Slot1-36_1_3662.d	22819	0.885	0.8947	0.0202	214	4040	1	1	1	1			5 35 12 12 22 22 6 0 0	YLNQHIEHV	P28715|ERCC5_HUMAN	DB Search	YLNQHIEHV	YLNQHIEHV
347	MPHHTPHQL	47.03	1096.52	9	100	9	1.1	549.27	2	9.6682	-2.0191	0.75	478069	Neo_sh14_patient1_HLAI_0412_HM1114_tims_Slot1-36_1_3662.d	8053	0.8458	0.8555	0.0293			1	1	0	0			5 44 63 27 27 33 7 44 5	MPHHTPHQL	O75909|CCNK_HUMAN	DB Search	MPHHTPHQL	MPHHTPHQL
348	VAAAHSVVL	34.45	865.502	9	100	9	-1.1	433.758	2	23.7303	0.0985	0.73	1180386	Neo_sh14_patient1_HLAI_0412_HM1114_tims_Slot1-36_1_3662.d	29214	0.7757	0.7854	0.0194			2	2	0	0			5 12 2 2 4 10 89 11 5	VAAAHSVVL	Q96A65|EXOC4_HUMAN	DB Search	VAAAHSVVL	VAAAHSVVL
349	KVFKQIFSK	26.84	1123.68	9	88.9	9	0.5	562.845	2	17.9709	-0.593	0.49	893183	Neo_sh14_patient1_HLAI_0412_HM1114_tims_Slot1-36_1_3662.d	21083	0.8865	0.8962	0.0286			1	1	0	0			5 27 3 0 26 10 10 70 5	KVFKQIFSK	O15228|GNPAT_HUMAN	DB Search	KVFKQIFSK	KVFKQIFSK
350	SVYYPQVRK	29.87	1138.61	9	44.4	9	-2.7	570.312	2	18.5773	1.0985	0.91	923446	Neo_sh14_patient1_HLAI_0412_HM1114_tims_Slot1-36_1_3662.d	21970	0.8722	0.8819	0.043			1	1	0	0			0 0 23 23 4 4 0 0 0	SVYYPQVRK	O94915|FRYL_HUMAN	DB Search	SVYYPQVRK	SVYYPQVRK
351	HPYPHNHYM	42.74	1194.5	9	100	9	4.9	598.262	2	11.4507	0.73	0.75	567395	Neo_sh14_patient1_HLAI_0412_HM1114_tims_Slot1-36_1_3662.d	11087	0.8846	0.8943	0.0405			3	3	0	0			5 18 18 39 15 15 28 17 5	HPYPHNHYM	Q99967|CITE2_HUMAN	DB Search	HPYPHNHYM	HPYPHNHYM
352	FPIEVRHYL	32.21	1172.63	9	55.6	9	-0.4	587.324	2	43.5659	-0.8098	0.86	2151101	Neo_sh14_patient1_HLAI_0412_HM1114_tims_Slot1-36_1_3662.d	47045	0.925	0.9347	0.0202			1	1	0	0			5 30 60 40 0 0 3 0 0	FPIEVRHYL	P42229|STA5A_HUMAN:P51692|STA5B_HUMAN	DB Search	FPIEVRHYL	FPIEVRHYL
353	IPDSHEITL	26.41	1023.52	9	77.8	9	-4.4	512.767	2	37.0523	-1.8849	0.75	1825113	Neo_sh14_patient1_HLAI_0412_HM1114_tims_Slot1-36_1_3662.d	40521	0.8451	0.8547	0.0001	731	5990	2	2	1	1			5 4 4 0 0 8 13 6 5	IPDSHEITL	Q9NW82|WDR70_HUMAN	DB Search	IPDSHEITL	IPDSHEITL
354	ALNELLQHV	38.74	1035.57	9	77.8	9	0.7	518.793	2	47.6092	-5.7397	0.72	2347104	Neo_sh14_patient1_HLAI_0412_HM1114_tims_Slot1-36_1_3662.d	50268	0.8416	0.8513	0.0236	5130	56800	4	4	1	1			3 3 32 27 23 17 2 0 0	ALNELLQHV	Q9Y490|TLN1_HUMAN	DB Search	ALNELLQHV	ALNELLQHV
355	ALVDHTPYL	34.25	1027.53	9	44.4	9	2	514.775	2	40.6359	1.3889	0.63	2005382	Neo_sh14_patient1_HLAI_0412_HM1114_tims_Slot1-36_1_3662.d	44534	0.8664	0.8761	-0.0012	172	3130	2	2	1	1			0 0 0 0 0 17 21 11 5	ALVDHTPYL	P13611|CSPG2_HUMAN	DB Search	ALVDHTPYL	ALVDHTPYL
356	LPSEHQTIL	36	1036.56	9	77.8	9	-0.8	519.284	2	30.4488	2.8556	0.71	1504550	Neo_sh14_patient1_HLAI_0412_HM1114_tims_Slot1-36_1_3662.d	33914	0.8451	0.8547	0.0101			1	1	0	0			5 2 0 0 5 6 28 16 5	LPSEHQTIL	Q9H992|MARH7_HUMAN	DB Search	LPSEHQTIL	LPSEHQTIL
357	ALNEDIVRV	21.86	1027.57	9	77.8	9	1.1	514.791	2	38.6059	1.4928	0.78	1905953	Neo_sh14_patient1_HLAI_0412_HM1114_tims_Slot1-36_1_3662.d	42413	0.823	0.8327	0.0422			2	2	0	0			4 4 8 8 4 4 5 0 0	ALNEDIVRV	Q2M1P5|KIF7_HUMAN	DB Search	ALNEDIVRV	ALNEDIVRV
358	FAMDVYKNL	40.91	1099.54	9	66.7	9	-10.4	550.77	2	47.8804	-0.7071	0.75	2363872	Neo_sh14_patient1_HLAI_0412_HM1114_tims_Slot1-36_1_3662.d	50512	0.8582	0.8679	0.0369			1	1	0	0			5 9 79 57 43 22 0 0 0	FAMDVYKNL	P60228|EIF3E_HUMAN	DB Search	FAMDVYKNL	FAMDVYKNL
359	HPQQFQYTL	26.14	1160.56	9	55.6	9	-4.4	581.285	2	35.737	-0.0817	0.93	1761179	Neo_sh14_patient1_HLAI_0412_HM1114_tims_Slot1-36_1_3662.d	39011	0.8687	0.8784	0.0464	245	4710	1	1	1	1			0 0 0 0 35 38 46 4 4	HPQQFQYTL	O14832|PAHX_HUMAN	DB Search	HPQQFQYTL
360	KVSTQVLQK	45.01	1029.62	9	100	9	5.8	515.819	2	12.0581	1.1826	0.85	597837	Neo_sh14_patient1_HLAI_0412_HM1114_tims_Slot1-36_1_3662.d	12153	0.8389	0.8485	0.0263			2	2	0	0			5 45 8 8 9 9 15 5 5	KVSTQVLQK	Q8NF50|DOCK8_HUMAN	DB Search	KVSTQVLQK	KVSTQVLQK
361	RLYAGSTVK	24.19	993.561	9	66.7	9	4.9	497.79	2	10.8435	-0.159	0.89	536977	Neo_sh14_patient1_HLAI_0412_HM1114_tims_Slot1-36_1_3662.d	10045	0.8385	0.8482	0.0267			1	1	0	0			0 0 0 3 29 38 43 39 5	RLYAGSTVK	Q16881|TRXR1_HUMAN	DB Search	RLYAGSTVK	RLYAGSTVK
362	HVLDVIHEV	27.26	1059.57	9	44.4	9	-8.2	530.789	2	39.8179	3.6858	0.67	1965986	Neo_sh14_patient1_HLAI_0412_HM1114_tims_Slot1-36_1_3662.d	43694	0.8555	0.8652	0.0296			1	1	0	0			5 29 23 0 0 79 0 0 0	HVLDVIHEV	O75962|TRIO_HUMAN	DB Search	HVLDVIHEV	HVLDVIHEV
363	SAAPVAHLL	28.35	877.502	9	44.4	9	2.6	439.759	2	37.3555	0.1978	0.8	1843931	Neo_sh14_patient1_HLAI_0412_HM1114_tims_Slot1-36_1_3662.d	40979	0.7703	0.78	0.0248			3	3	0	0			0 0 27 33 10 10 1 0 0	SAAPVAHLL	Q9H422|HIPK3_HUMAN	DB Search	SAAPVAHLL	SAAPVAHLL
364	KVAYSILHK	46.5	1057.63	9	100	9	1.3	529.822	2	16.1902	1.9811	0.74	804201	Neo_sh14_patient1_HLAI_0412_HM1114_tims_Slot1-36_1_3662.d	18393	0.861	0.8706	0.0242			2	2	0	0			5 17 34 34 5 5 7 8 5	KVAYSILHK	Q9Y2E4|DIP2C_HUMAN	DB Search	KVAYSILHK	KVAYSILHK
365	RIADIFVKK	46.9	1088.67	9	55.6	9	7.4	363.9	3	22.7068	-1.8562	0.88	1129294	Neo_sh14_patient1_HLAI_0412_HM1114_tims_Slot1-36_1_3662.d	27694	0.6799	0.6895	0.0253			4	4	0	0			0 0 3 3 30 7 3 0 0	RIADIFVKK	Q6ZV73|FGD6_HUMAN	DB Search	RIADIFVKK	RIADIFVKK
366	TPQDHEVAL	41.4	1008.49	9	88.9	9	-0.3	505.251	2	21.3181	0.103	0.85	1059442	Neo_sh14_patient1_HLAI_0412_HM1114_tims_Slot1-36_1_3662.d	25774	0.8249	0.8346	0.0102	4570	42400	2	2	1	1			5 13 1 2 3 34 40 22 5	TPQDHEVAL	Q8NFA0|UBP32_HUMAN:P35125|UBP6_HUMAN	DB Search	TPQDHEVAL	TPQDHEVAL
367	VFDEADRMF	27.74	1128.49	9	55.6	9	7.1	565.257	2	43.5659	-0.637	0.87	2151103	Neo_sh14_patient1_HLAI_0412_HM1114_tims_Slot1-36_1_3662.d	47047	0.8714	0.8811	0.0237			1	1	0	0			5 31 35 35 2 0 0 0 0	VFDEADRMF	Q86XP3|DDX42_HUMAN	DB Search	VFDEADRMF	VFDEADRMF
368	RLYSVTVTTK	40.78	1166.67	10	80	10	0.7	584.341	2	20.5478	0.5807	0.82	1021674	Neo_sh14_patient1_HLAI_0412_HM1114_tims_Slot1-36_1_3662.d	24726	0.9005	0.9102	0.0246			1	1	0	0			0 0 2 2 2 13 25 19 16 5	RLYSVTVTTK	P23467|PTPRB_HUMAN	DB Search	RLYSVTVTTK	RLYSVTVTTK
369	FPQHTIASL	31.95	1012.53	9	100	9	0.6	507.275	2	36.7931	-2.1885	0.77	1817569	Neo_sh14_patient1_HLAI_0412_HM1114_tims_Slot1-36_1_3662.d	40321	0.8361	0.8458	0.019	2600	18900	3	3	1	1			5 5 14 15 43 60 32 32 5	FPQHTIASL	Q13888|TF2H2_HUMAN:Q6P1K8|T2H2L_HUMAN	DB Search	FPQHTIASL	FPQHTIASL
370	RVYEANVEK	32.38	1106.57	9	55.6	9	3.6	554.295	2	10.6159	0.3107	0.87	525541	Neo_sh14_patient1_HLAI_0412_HM1114_tims_Slot1-36_1_3662.d	9625	0.8703	0.88	0.0249			1	1	0	0			1 0 0 0 14 26 30 30 5	RVYEANVEK	Q15057|ACAP2_HUMAN	DB Search	RVYEANVEK	RVYEANVEK
371	ALYSVYRQK	47.77	1126.61	9	88.9	9	3.8	564.316	2	18.8792	1.7649	0.97	938537	Neo_sh14_patient1_HLAI_0412_HM1114_tims_Slot1-36_1_3662.d	22373	0.9025	0.9122	0.0227	6680	71700	2	2	1	1			2 2 78 36 36 4 0 2 2	ALYSVYRQK	Q969V5|MUL1_HUMAN	DB Search	ALYSVYRQK	ALYSVYRQK
372	HPSSTTPNL	28.53	952.461	9	55.6	9	3.3	477.24	2	16.0008	0.4184	0.88	794757	Neo_sh14_patient1_HLAI_0412_HM1114_tims_Slot1-36_1_3662.d	18129	0.7777	0.7873	0.0475			1	1	0	0			0 0 0 0 6 13 2 2 5	HPSSTTPNL	P15289|ARSA_HUMAN	DB Search	HPSSTTPNL	HPSSTTPNL
373	RVADTIVAK	19.64	971.576	9	55.6	9	-16.2	486.788	2	13.2727	0.4148	0.76	658546	Neo_sh14_patient1_HLAI_0412_HM1114_tims_Slot1-36_1_3662.d	14110	0.8036	0.8133	0.0516			1	1	0	0			0 0 0 0 17 30 18 18 5	RVADTIVAK	Q8NCM8|DYHC2_HUMAN	DB Search	RVADTIVAK	RVADTIVAK
374	KVAIKIISK	26.53	998.685	9	66.7	9	-2.2	500.349	2	17.4012	2.9108	0.85	864728	Neo_sh14_patient1_HLAI_0412_HM1114_tims_Slot1-36_1_3662.d	20168	0.8389	0.8485	0.0263	409	8480	2	2	1	1			5 45 33 33 10 0 13 0 0	KVAIKIISK	O96017|CHK2_HUMAN	DB Search	KVAIKIISK	KVAIKIISK
375	GLADKVYFL	41.38	1024.56	9	55.6	9	5	513.289	2	53.6336	1.1273	0.77	2646732	Neo_sh14_patient1_HLAI_0412_HM1114_tims_Slot1-36_1_3662.d	54300	0.8373	0.847	0.0378			1	1	0	0			0 0 0 0 10 12 64 26 5	GLADKVYFL	P27708|PYR1_HUMAN	DB Search	GLADKVYFL	GLADKVYFL
376	KVSTSPLTK	37.16	959.565	9	100	9	-16.6	480.782	2	10.5779	0.5269	0.87	523644	Neo_sh14_patient1_HLAI_0412_HM1114_tims_Slot1-36_1_3662.d	9564	0.7947	0.8044	0.0405			2	2	0	0			5 72 7 3 3 3 4 2 2	KVSTSPLTK	Q9Y320|TMX2_HUMAN	DB Search	KVSTSPLTK	KVSTSPLTK
377	RM(+15.99)KDPTFLGK	17.77	1207.64	10	40	10	7.3	403.556	3	13.8795	1.7539	0.71	688847	Neo_sh14_patient1_HLAI_0412_HM1114_tims_Slot1-36_1_3662.d	15035	0.7289	0.7386	0.0162			1	1	0	0	Oxidation (M)	M2:Oxidation (M):1000.00	0 0 0 34 39 36 36 0 0 0	RM(+15.99)KDPTFLGK	Q5VWN6|TASO2_HUMAN	DB Search	RMKDPTFLGK	RMKDPTFLGK
378	HPYFYAPEL	26.11	1135.53	9	44.4	9	2.9	568.776	2	49.2808	0.8005	0.78	2432851	Neo_sh14_patient1_HLAI_0412_HM1114_tims_Slot1-36_1_3662.d	51559	0.8768	0.8865	0.0283			1	1	0	0			0 0 7 15 23 23 0 0 0	HPYFYAPEL	P02768|ALBU_HUMAN	DB Search	HPYFYAPEL	HPYFYAPEL
379	VYDVVEEKL	46.36	1092.57	9	77.8	9	-4.2	547.29	2	37.5742	-1.4959	0.74	1853364	Neo_sh14_patient1_HLAI_0412_HM1114_tims_Slot1-36_1_3662.d	41232	0.8466	0.8563	0.0485	242	4210	2	2	1	1			5 51 10 8 6 3 3 0 0	VYDVVEEKL	P29074|PTN4_HUMAN	DB Search	VYDVVEEKL	VYDVVEEKL
380	KLLEKHITK	38.59	1108.7	9	100	9	3.4	555.358	2	7.4316	-2.2925	0.86	366125	Neo_sh14_patient1_HLAI_0412_HM1114_tims_Slot1-36_1_3662.d	4433	0.8679	0.8776	0.0372			1	1	0	0			5 64 27 26 26 9 9 10 5	KLLEKHITK	Q14573|ITPR3_HUMAN	DB Search	KLLEKHITK	KLLEKHITK
381	AVKDPLVKK	43.57	996.633	9	100	9	4.7	499.326	2	9.9334	-1.2208	0.85	491381	Neo_sh14_patient1_HLAI_0412_HM1114_tims_Slot1-36_1_3662.d	8513	0.8315	0.8412	0.0337			2	2	0	0			5 9 58 89 5 5 7 4 4	AVKDPLVKK	Q96CB8|INT12_HUMAN	DB Search	AVKDPLVKK	AVKDPLVKK
382	LPHISDVVL	21.15	991.57	9	44.4	9	0.5	496.793	2	51.7411	1.7259	0.66	2553718	Neo_sh14_patient1_HLAI_0412_HM1114_tims_Slot1-36_1_3662.d	53086	0.8206	0.8303	0.0245			3	3	0	0			0 0 0 7 0 0 36 21 5	LPHISDVVL	Q04637|IF4G1_HUMAN	DB Search	LPHISDVVL	LPHISDVVL
383	RLYSVSYLLK	40.58	1240.72	10	70	10	1.8	621.367	2	40.5377	-0.0881	0.87	2001628	Neo_sh14_patient1_HLAI_0412_HM1114_tims_Slot1-36_1_3662.d	44452	0.951	0.9607	0.0242			1	1	0	0			0 0 3 0 3 15 76 82 18 5	RLYSVSYLLK	P21333|FLNA_HUMAN	DB Search	RLYSVSYLLK	RLYSVSYLLK
384	TPSVHEPVL	37.28	977.518	9	66.7	9	-1.2	489.766	2	31.5466	1.876	0.65	1558735	Neo_sh14_patient1_HLAI_0412_HM1114_tims_Slot1-36_1_3662.d	34855	0.7951	0.8048	0.0401			1	1	0	0			5 11 0 0 0 30 77 9 5	TPSVHEPVL	O95714|HERC2_HUMAN	DB Search	TPSVHEPVL	TPSVHEPVL
385	KVLTPIKEK	21.44	1054.67	9	22.2	9	-0.4	528.345	2	10.6917	-0.6674	0.67	529328	Neo_sh14_patient1_HLAI_0412_HM1114_tims_Slot1-36_1_3662.d	9740	0.833	0.8427	0.0621			1	1	0	0			0 0 10 10 0 0 0 0 0	KVLTPIKEK	Q8N960|CE120_HUMAN	DB Search	KVLTPIKEK	KVLTPIKEK
386	FLVQNIHTL	41.4	1083.61	9	55.6	9	-3.6	542.809	2	47.1236	-1.2136	0.76	2326583	Neo_sh14_patient1_HLAI_0412_HM1114_tims_Slot1-36_1_3662.d	49943	0.8955	0.9052	-0.0003			1	1	0	0			5 16 53 53 0 0 31 0 0	FLVQNIHTL	Q8TDN6|BRX1_HUMAN	DB Search	FLVQNIHTL	FLVQNIHTL
387	SPNYDHVVL	46.04	1042.51	9	77.8	9	6.5	522.265	2	33.8686	-0.6662	0.7	1671121	Neo_sh14_patient1_HLAI_0412_HM1114_tims_Slot1-36_1_3662.d	37081	0.8497	0.8594	-0.0046			4	4	0	0			0 0 2 2 5 20 24 4 4	SPNYDHVVL	Q13347|EIF3I_HUMAN	DB Search	SPNYDHVVL	SPNYDHVVL
388	HPQTHETAL	52.64	1032.5	9	100	9	2.4	517.258	2	9.0112	-1.3197	0.68	443937	Neo_sh14_patient1_HLAI_0412_HM1114_tims_Slot1-36_1_3662.d	6969	0.828	0.8377	0.0271	26800	315000	3	3	1	1			5 25 23 18 39 79 88 29 5	HPQTHETAL	Q9H2K2|TNKS2_HUMAN	DB Search	HPQTHETAL	HPQTHETAL
389	RLQEEINEV	40.58	1128.58	9	66.7	9	3	565.298	2	24.4905	-2.0098	0.91	1216363	Neo_sh14_patient1_HLAI_0412_HM1114_tims_Slot1-36_1_3662.d	30307	0.8683	0.878	0.0368	3540	62100	1	1	1	1			0 0 1 12 23 59 59 30 5	RLQEEINEV	Q70UQ0|IKIP_HUMAN	DB Search	RLQEEINEV	RLQEEINEV
390	HPVHPDIKL	55.55	1054.59	9	100	9	4.3	528.306	2	21.2264	2.5363	0.76	1053753	Neo_sh14_patient1_HLAI_0412_HM1114_tims_Slot1-36_1_3662.d	25593	0.8404	0.8501	0.0547	82300	722000	13	13	2	2			5 9 10 25 5 5 62 2 2	HPVHPDIKL	O75925|PIAS1_HUMAN	DB Search	HPVHPDIKL	HPVHPDIKL
391	KLSVPVRKK	21.72	1053.7	9	44.4	9	-0.1	527.858	2	8.1521	-1.8233	0.93	402234	Neo_sh14_patient1_HLAI_0412_HM1114_tims_Slot1-36_1_3662.d	5658	0.8547	0.8644	0.0304			1	1	0	0			5 41 15 15 1 1 0 0 0	KLSVPVRKK	P46100|ATRX_HUMAN	DB Search	KLSVPVRKK	KLSVPVRKK
392	RLDDAIHVL	47.55	1050.58	9	44.4	9	3.5	526.3	2	39.4139	1.498	0.92	1945331	Neo_sh14_patient1_HLAI_0412_HM1114_tims_Slot1-36_1_3662.d	43235	0.8544	0.8641	0.0208	1230	16800	2	2	1	1			0 0 0 3 16 29 29 0 0	RLDDAIHVL	Q99081|HTF4_HUMAN:P15884|ITF2_HUMAN	DB Search	RLDDAIHVL	RLDDAIHVL
393	HVYSWPKNK	58.47	1157.6	9	77.8	9	3.9	579.809	2	12.8157	1.1284	0.86	632022	Neo_sh14_patient1_HLAI_0412_HM1114_tims_Slot1-36_1_3662.d	13290	0.8881	0.8978	0.0271	1430	16500	2	2	1	1			5 26 20 13 13 7 5 0 0	HVYSWPKNK	O43734|CIKS_HUMAN	DB Search	HVYSWPKNK	HVYSWPKNK
394	IPVHDGYVL	29.74	1011.54	9	77.8	9	1.8	506.778	2	38.189	-4.0479	0.78	1885281	Neo_sh14_patient1_HLAI_0412_HM1114_tims_Slot1-36_1_3662.d	41937	0.8272	0.8369	0.0279	1190	13400	3	3	1	1			5 9 9 2 0 0 27 20 5	IPVHDGYVL	O96019|ACL6A_HUMAN:O94805|ACL6B_HUMAN	DB Search	IPVHDGYVL	IPVHDGYVL
395	SLIGHLQTL	22.63	980.565	9	44.4	9	0.4	491.29	2	45.4206	0.9162	0.81	2242532	Neo_sh14_patient1_HLAI_0412_HM1114_tims_Slot1-36_1_3662.d	48512	0.8203	0.8299	0.0149			2	2	0	0			0 0 45 6 0 53 39 0 0	SLIGHLQTL	Q16690|DUS5_HUMAN	DB Search	SLIGHLQTL	SLIGHLQTL
396	SLYHKLREK	28.25	1172.67	9	33.3	9	1.1	587.341	2	7.9625	-2.0633	0.75	392742	Neo_sh14_patient1_HLAI_0412_HM1114_tims_Slot1-36_1_3662.d	5346	0.8982	0.9079	0.047			2	2	0	0			0 0 28 28 34 0 0 0 0	SLYHKLREK	Q15392|DHC24_HUMAN	DB Search	SLYHKLREK	SLYHKLREK
397	TLAEHIIEA	27.94	995.529	9	55.6	9	6.8	498.775	2	35.0168	-4.4072	0.67	1729273	Neo_sh14_patient1_HLAI_0412_HM1114_tims_Slot1-36_1_3662.d	38317	0.8098	0.8195	0.0354	608	9850	3	3	1	1			0 0 37 0 0 36 26 26 5	TLAEHIIEA	Q9Y6Y1|CMTA1_HUMAN	DB Search	TLAEHIIEA	TLAEHIIEA
398	IFDGNVAHI	38.8	984.503	9	100	9	2	493.26	2	39.1707	-0.4744	0.92	1932215	Neo_sh14_patient1_HLAI_0412_HM1114_tims_Slot1-36_1_3662.d	42971	0.8164	0.8261	0.0288	2820	38000	3	3	2	2			5 58 37 4 4 5 20 5 5	IFDGNVAHI	P46939|UTRN_HUMAN	DB Search	IFDGNVAHI	IFDGNVAHI
399	RLVSYFIKK	44.26	1152.7	9	55.6	9	-1.2	385.241	3	22.7448	-0.0658	0.83	1131188	Neo_sh14_patient1_HLAI_0412_HM1114_tims_Slot1-36_1_3662.d	27752	0.6934	0.703	0.0318			1	1	0	0			0 0 8 28 51 36 15 0 0	RLVSYFIKK	Q16831|UPP1_HUMAN	DB Search	RLVSYFIKK	RLVSYFIKK
400	KLREPNFTLK	42.35	1244.72	10	50	10	3.1	623.371	2	23.2328	1.8663	0.74	1153891	Neo_sh14_patient1_HLAI_0412_HM1114_tims_Slot1-36_1_3662.d	28423	0.9281	0.9378	0.0371	5450	80800	3	3	1	1			5 1 0 1 1 1 7 7 16 5	KLREPNFTLK	Q92545|TM131_HUMAN	DB Search	KLREPNFTLK	KLREPNFTLK
401	LPTHLDPAM	35.4	993.495	9	66.7	9	12.4	497.761	2	36.4079	-5.203	0.87	1796911	Neo_sh14_patient1_HLAI_0412_HM1114_tims_Slot1-36_1_3662.d	39859	0.7986	0.8083	0.0366			2	2	0	0			5 0 0 0 4 4 7 7 5	LPTHLDPAM	O75376|NCOR1_HUMAN	DB Search	LPTHLDPAM	LPTHLDPAM
402	RMDEKFLTK	43.57	1166.61	9	44.4	9	1.4	389.878	3	16.7963	1.0324	0.85	834428	Neo_sh14_patient1_HLAI_0412_HM1114_tims_Slot1-36_1_3662.d	19244	0.6907	0.7003	0.0345			3	3	0	0			0 0 0 62 30 17 6 0 0	RMDEKFLTK	Q5VT06|CE350_HUMAN	DB Search	RMDEKFLTK	RMDEKFLTK
403	SLAEILLKK	32.37	1013.65	9	44.4	9	1.6	507.832	2	40.1589	1.9314	0.9	1979124	Neo_sh14_patient1_HLAI_0412_HM1114_tims_Slot1-36_1_3662.d	43980	0.8447	0.8544	0.0305	2020	22200	1	1	1	1			1 1 26 18 10 10 0 0 0	SLAEILLKK	O15397|IPO8_HUMAN:O95373|IPO7_HUMAN	DB Search	SLAEILLKK	SLAEILLKK
404	KVYDKAINR	45.91	1105.62	9	66.7	9	0.8	553.82	2	9.3321	-1.4405	0.92	461006	Neo_sh14_patient1_HLAI_0412_HM1114_tims_Slot1-36_1_3662.d	7514	0.8838	0.8935	0.0113	7380	141000	6	6	1	1			5 47 37 37 17 5 1 1 1	KVYDKAINR	Q6KC79|NIPBL_HUMAN	DB Search	KVYDKAINR	KVYDKAINR
405	LVYKYIVQK	18.01	1152.69	9	33.3	9	0.7	577.353	2	24.2986	-1.7904	0.71	1208772	Neo_sh14_patient1_HLAI_0412_HM1114_tims_Slot1-36_1_3662.d	30060	0.8908	0.9005	0.0643			1	1	0	0			0 0 33 33 0 0 16 0 0	LVYKYIVQK	Q9Y6G9|DC1L1_HUMAN	DB Search	LVYKYIVQK	LVYKYIVQK
406	KTSSGFLAK	40.12	937.523	9	88.9	9	-1.9	469.768	2	10.5779	0.451	0.81	523620	Neo_sh14_patient1_HLAI_0412_HM1114_tims_Slot1-36_1_3662.d	9540	0.8013	0.811	0.0239			1	1	0	0			5 89 12 6 0 12 10 10 5	KTSSGFLAK	Q7Z3T8|ZFY16_HUMAN	DB Search	KTSSGFLAK	KTSSGFLAK
407	SPNAEIHIL	36.41	992.529	9	100	9	7.5	497.276	2	39.6285	1.4455	0.67	1956618	Neo_sh14_patient1_HLAI_0412_HM1114_tims_Slot1-36_1_3662.d	43506	0.8447	0.8544	-0.0095	256	4150	3	3	1	1			5 6 73 73 23 23 10 12 5	SPNAEIHIL	Q14807|KIF22_HUMAN	DB Search	SPNAEIHIL	SPNAEIHIL
408	ALSGHLETV	20.67	925.487	9	44.4	9	-9.6	463.746	2	23.6166	-0.2712	0.82	1174723	Neo_sh14_patient1_HLAI_0412_HM1114_tims_Slot1-36_1_3662.d	29059	0.7916	0.8013	0.0336			1	1	0	0			0 0 0 0 0 37 36 2 2	ALSGHLETV	A6NMY6|AXA2L_HUMAN:P07355|ANXA2_HUMAN	DB Search	ALSGHLETV	ALSGHLETV
409	SLLQTLYKV	24.67	1063.63	9	55.6	9	-0.3	532.821	2	53.0656	-3.2296	0.61	2618728	Neo_sh14_patient1_HLAI_0412_HM1114_tims_Slot1-36_1_3662.d	53836	0.859	0.8687	0.0361			1	1	0	0			0 0 18 18 19 11 11 0 0	SLLQTLYKV	P46060|RAGP1_HUMAN	DB Search	SLLQTLYKV	SLLQTLYKV
410	SLM(+15.99)HSFILK	37.41	1090.58	9	55.6	9	-2.9	546.298	2	38.7953	11.7882	0.78	1915328	Neo_sh14_patient1_HLAI_0412_HM1114_tims_Slot1-36_1_3662.d	42608	0.8862	0.8959	0.019			1	1	0	0	Oxidation (M)	M3:Oxidation (M):1000.00	0 0 14 28 41 41 62 0 0	SLM(+15.99)HSFILK	Q9NP97|DLRB1_HUMAN	DB Search	SLMHSFILK	SLMHSFILK
411	RIYKPLRTR	16.92	1201.74	9	33.3	9	1.4	401.588	3	8.3415	0.3421	0.34	411698	Neo_sh14_patient1_HLAI_0412_HM1114_tims_Slot1-36_1_3662.d	5942	0.7328	0.7425	0.0324			1	1	0	0			5 92 0 35 0 0 0 0 0	RIYKPLRTR	Q14137|BOP1_HUMAN	DB Search	RIYKPLRTR	RIYKPLRTR
412	RIFQKFLQR	31.79	1234.73	9	55.6	9	10.1	412.588	3	23.6166	0.5771	0.85	1174727	Neo_sh14_patient1_HLAI_0412_HM1114_tims_Slot1-36_1_3662.d	29063	0.6864	0.6961	0.0687	536	7910	6	6	1	1			0 0 3 37 37 27 4 0 0	RIFQKFLQR	Q12965|MYO1E_HUMAN	DB Search	RIFQKFLQR	RIFQKFLQR
413	M(+15.99)PLHVAPLL	20.94	1005.57	9	44.4	9	4.8	503.794	2	48.7735	1.8204	0.7	2404916	Neo_sh14_patient1_HLAI_0412_HM1114_tims_Slot1-36_1_3662.d	51164	0.8117	0.8214	0.0434	426	4910	2	2	1	1	Oxidation (M)	M1:Oxidation (M):1000.00	0 0 0 2 3 3 0 0 5	M(+15.99)PLHVAPLL	P24468|COT2_HUMAN:P10589|COT1_HUMAN	DB Search	MPLHVAPLL	MPLHVAPLL
414	SPDHTIILL	27.19	1007.57	9	66.7	9	-1.2	504.789	2	50.1704	3.2174	0.89	2471970	Neo_sh14_patient1_HLAI_0412_HM1114_tims_Slot1-36_1_3662.d	52122	0.8389	0.8485	0.0063	1490	12200	2	2	1	1			4 0 0 1 10 50 74 15 5	SPDHTIILL	Q6ZT21|TMPPE_HUMAN	DB Search	SPDHTIILL
415	KLLAHPLQR	37.18	1074.67	9	55.6	9	-4.9	359.228	3	13.6898	-0.1799	0.95	679371	Neo_sh14_patient1_HLAI_0412_HM1114_tims_Slot1-36_1_3662.d	14739	0.7255	0.7351	0.0197			3	3	0	0			0 0 5 10 10 15 3 0 0	KLLAHPLQR	Q9NWV8|BABA1_HUMAN	DB Search	KLLAHPLQR	KLLAHPLQR
416	RTIFPLFM(+15.99)K	18.16	1167.65	9	11.1	9	2.3	584.832	2	45.3827	0.1588	0.72	2240669	Neo_sh14_patient1_HLAI_0412_HM1114_tims_Slot1-36_1_3662.d	48485	0.8904	0.9001	0.0347			2	2	0	0	Oxidation (M)	M8:Oxidation (M):1000.00	0 0 0 0 0 0 62 0 0	RTIFPLFM(+15.99)K	Q8WYA6|CTBL1_HUMAN	DB Search	RTIFPLFMK	RTIFPLFMK
417	SVIGVFITK	30.49	962.58	9	55.6	9	-15.8	482.29	2	47.275	1.716	0.92	2334051	Neo_sh14_patient1_HLAI_0412_HM1114_tims_Slot1-36_1_3662.d	50067	0.8028	0.8125	0.0323			1	1	0	0			0 0 96 9 9 8 6 0 0	SVIGVFITK	Q9HC58|NCKX3_HUMAN	DB Search	SVIGVFITK	SVIGVFITK
418	SVNSTVLVK	19.76	945.549	9	22.2	9	-1.1	473.781	2	20.5478	-3.125	0.91	1021678	Neo_sh14_patient1_HLAI_0412_HM1114_tims_Slot1-36_1_3662.d	24730	0.7935	0.8032	0.0216			1	1	0	0			0 0 30 14 0 0 0 0 0	SVNSTVLVK	Q86YT9|JAML_HUMAN	DB Search	SVNSTVLVK	SVNSTVLVK
419	FQVDHARSL	39.21	1071.55	9	66.7	9	3.5	536.782	2	20.5857	-0.1421	0.72	1023543	Neo_sh14_patient1_HLAI_0412_HM1114_tims_Slot1-36_1_3662.d	24759	0.8838	0.8935	0.0013			1	1	0	0			5 6 50 35 5 5 0 0 0	FQVDHARSL	Q86TG1|T150A_HUMAN	DB Search	FQVDHARSL	FQVDHARSL
420	APEEEDHVL	35.12	1037.47	9	55.6	9	1.3	519.741	2	20.4934	-0.6914	0.53	1015999	Neo_sh14_patient1_HLAI_0412_HM1114_tims_Slot1-36_1_3662.d	24559	0.8234	0.833	0.0118	371	4080	1	1	1	1			5 65 45 26 0 0 12 0 0	APEEEDHVL	P07237|PDIA1_HUMAN	DB Search	APEEEDHVL	APEEEDHVL
421	SVYVLVRQK	42.32	1090.65	9	44.4	9	-0.2	546.332	2	21.6111	1.644	0.9	1074542	Neo_sh14_patient1_HLAI_0412_HM1114_tims_Slot1-36_1_3662.d	26186	0.8749	0.8846	0.0402	3040	32900	2	2	1	1			0 0 62 62 22 9 0 0 0	SVYVLVRQK	Q8WVX9|FACR1_HUMAN	DB Search	SVYVLVRQK	SVYVLVRQK
422	SVYVYKVLK	36.99	1097.65	9	33.3	9	-1.2	549.831	2	27.0809	0.838	0.89	1338746	Neo_sh14_patient1_HLAI_0412_HM1114_tims_Slot1-36_1_3662.d	31514	0.8772	0.8869	0.0479	1240	10400	12	12	1	1			0 0 52 52 14 0 0 0 0	SVYVYKVLK	P62807|H2B1C_HUMAN:Q93079|H2B1H_HUMAN:P57053|H2BFS_HUMAN:Q99879|H2B1M_HUMAN:P58876|H2B1D_HUMAN:O60814|H2B1K_HUMAN:Q99877|H2B1N_HUMAN:Q5QNW6|H2B2F_HUMAN:Q99880|H2B1L_HUMAN	DB Search	SVYVYKVLK	SVYVYKVLK
423	STSERTLLK	32.2	1033.58	9	88.9	9	-3.2	517.794	2	11.9822	-0.3481	0.87	594038	Neo_sh14_patient1_HLAI_0412_HM1114_tims_Slot1-36_1_3662.d	12026	0.8327	0.8423	0.0425			1	1	0	0			5 17 16 3 0 5 26 65 5	STSERTLLK	Q6P2E9|EDC4_HUMAN	DB Search	STSERTLLK	STSERTLLK
424	KVRITLVTK	28.15	1056.7	9	100	9	7	529.362	2	17.5161	0.7684	0.87	870406	Neo_sh14_patient1_HLAI_0412_HM1114_tims_Slot1-36_1_3662.d	20338	0.8718	0.8815	0.0133			1	1	0	0			5 6 4 2 2 6 78 24 5	KVRITLVTK	Q04864|REL_HUMAN	DB Search	KVRITLVTK	KVRITLVTK
425	SITSVFITK	17.44	994.57	9	44.4	9	11.6	498.298	2	40.9921	0.1412	0.87	2024163	Neo_sh14_patient1_HLAI_0412_HM1114_tims_Slot1-36_1_3662.d	44955	0.8075	0.8172	0.0377			1	1	0	0			0 0 22 8 6 5 0 0 0	SITSVFITK	Q9Y4A5|TRRAP_HUMAN	DB Search	SITSVFITK	SITSVFITK
426	RIASTLLLY	23.99	1048.63	9	44.4	9	4.5	525.324	2	49.0916	0.5041	0.88	2423539	Neo_sh14_patient1_HLAI_0412_HM1114_tims_Slot1-36_1_3662.d	51427	0.8528	0.8625	0.0323			1	1	0	0			0 0 1 0 0 19 68 10 5	RIASTLLLY	Q9UHD2|TBK1_HUMAN	DB Search	RIASTLLLY	RIASTLLLY
427	DPSHHDIAL	32.46	1003.47	9	100	9	14.5	502.751	2	20.8128	1.6129	0.73	1034885	Neo_sh14_patient1_HLAI_0412_HM1114_tims_Slot1-36_1_3662.d	25085	0.8249	0.8346	0.0102	2630	33700	3	3	1	1			4 4 4 2 10 30 21 9 5	DPSHHDIAL	P29597|TYK2_HUMAN	DB Search	DPSHHDIAL	DPSHHDIAL
428	KMAPTVLVH	47.04	994.563	9	100	9	1.8	498.29	2	22.0678	0.4909	0.79	1095293	Neo_sh14_patient1_HLAI_0412_HM1114_tims_Slot1-36_1_3662.d	26741	0.8416	0.8513	0.0236	1220	12800	1	1	1	1			5 25 48 4 4 8 22 8 5	KMAPTVLVH	Q6W2J9|BCOR_HUMAN	DB Search	KMAPTVLVH	KMAPTVLVH
429	GTYSKIM(+15.99)NH	23.85	1065.49	9	22.2	9	-2.1	533.752	2	8.0763	-5.237	0.69	398434	Neo_sh14_patient1_HLAI_0412_HM1114_tims_Slot1-36_1_3662.d	5530	0.8389	0.8485	0.0363			2	2	0	0	Oxidation (M)	M7:Oxidation (M):1000.00	0 0 0 15 15 1 1 0 0	GTYSKIM(+15.99)NH	Q13464|ROCK1_HUMAN	DB Search	GTYSKIMNH	GTYSKIMNH
430	KTKEAVLLLK	34.3	1141.74	10	100	10	6.2	571.883	2	19.8277	1.2953	0.77	985746	Neo_sh14_patient1_HLAI_0412_HM1114_tims_Slot1-36_1_3662.d	23682	0.8993	0.9091	0.0258			2	2	0	0			5 49 36 35 5 5 18 88 20 5	KTKEAVLLLK	P36578|RL4_HUMAN	DB Search	KTKEAVLLLK	KTKEAVLLLK
431	TVKIEHVSY	52.55	1074.57	9	100	9	-0.2	538.293	2	21.4279	1.7813	0.76	1065103	Neo_sh14_patient1_HLAI_0412_HM1114_tims_Slot1-36_1_3662.d	25927	0.8524	0.8621	0.0327	1650	20300	2	2	1	1			2 2 14 14 6 8 18 5 5	TVKIEHVSY	Q9Y6Q2|STON1_HUMAN	DB Search	TVKIEHVSY	TVKIEHVSY
432	RLSSKLIQH	39.22	1080.64	9	66.7	9	-10.1	361.217	3	12.4378	1.6911	0.82	616834	Neo_sh14_patient1_HLAI_0412_HM1114_tims_Slot1-36_1_3662.d	12790	0.6764	0.686	0.0288			3	3	0	0			5 0 6 18 65 31 11 0 0	RLSSKLIQH	P17097|ZNF7_HUMAN	DB Search	RLSSKLIQH	RLSSKLIQH
433	KM(+15.99)ADIYLKH	45.35	1133.59	9	100	9	-4	567.8	2	12.8934	-0.0243	0.61	639605	Neo_sh14_patient1_HLAI_0412_HM1114_tims_Slot1-36_1_3662.d	13529	0.8877	0.8974	0.0174			1	1	0	0	Oxidation (M)	M2:Oxidation (M):1000.00	5 26 34 18 38 38 43 25 5	KM(+15.99)ADIYLKH	Q7Z4L5|TT21B_HUMAN	DB Search	KMADIYLKH	KMADIYLKH
434	KLSQRVITH	25	1080.64	9	66.7	9	-0.8	541.327	2	9.5546	0.6589	0.76	472384	Neo_sh14_patient1_HLAI_0412_HM1114_tims_Slot1-36_1_3662.d	7876	0.8637	0.8734	0.0315			1	1	0	0			5 34 12 0 0 0 23 28 5	KLSQRVITH	P06729|CD2_HUMAN	DB Search	KLSQRVITH
435	HINGRVLYY	48.41	1133.6	9	77.8	9	0.2	567.806	2	23.9097	0.3968	0.84	1187927	Neo_sh14_patient1_HLAI_0412_HM1114_tims_Slot1-36_1_3662.d	29411	0.8842	0.8939	0.0409	8600	101000	5	5	1	1			5 66 11 1 0 2 9 8 5	HINGRVLYY	Q13751|LAMB3_HUMAN	DB Search	HINGRVLYY	HINGRVLYY
436	SFPTTKTYF	25.46	1090.53	9	55.6	9	1.2	546.275	2	38.7058	0.7898	0.77	1911569	Neo_sh14_patient1_HLAI_0412_HM1114_tims_Slot1-36_1_3662.d	42521	0.8544	0.8641	0.0308	404	4100	3	3	1	1			5 9 37 17 14 0 0 0 1	SFPTTKTYF	P69905|HBA_HUMAN	DB Search	SFPTTKTYF	SFPTTKTYF
437	GTLDYILQR	40.79	1077.58	9	55.6	9	7.6	539.802	2	44.1121	-0.7327	0.9	2175376	Neo_sh14_patient1_HLAI_0412_HM1114_tims_Slot1-36_1_3662.d	47452	0.8784	0.8881	0.0168	1330	27400	4	4	1	1			0 0 28 69 18 16 2 0 0	GTLDYILQR	Q9C0B1|FTO_HUMAN	DB Search	GTLDYILQR	GTLDYILQR
438	RTSQIYLHH	37.21	1153.6	9	55.6	9	0.2	577.807	2	11.0333	0.7024	0.71	546506	Neo_sh14_patient1_HLAI_0412_HM1114_tims_Slot1-36_1_3662.d	10394	0.8904	0.9001	0.0247			1	1	0	0			0 0 0 0 4 6 26 46 5	RTSQIYLHH	Q4ADV7|RIC1_HUMAN	DB Search	RTSQIYLHH	RTSQIYLHH
439	RQYDKFLTHF	27.08	1353.68	10	40	10	2.8	677.851	2	30.4867	-1.7249	0.45	1506413	Neo_sh14_patient1_HLAI_0412_HM1114_tims_Slot1-36_1_3662.d	33941	0.9401	0.9498	0.055			2	2	0	0			0 0 0 0 0 0 3 6 10 5	RQYDKFLTHF	Q7Z6M2|FBX33_HUMAN	DB Search	RQYDKFLTHF	RQYDKFLTHF
440	AQYGNILKH	38.84	1042.56	9	55.6	9	1.2	522.286	2	19.6856	2.0238	0.8	976308	Neo_sh14_patient1_HLAI_0412_HM1114_tims_Slot1-36_1_3662.d	23424	0.852	0.8617	0.0231	1210	15500	2	2	1	1			0 0 34 5 2 9 3 0 0	AQYGNILKH	Q8NFH5|NUP35_HUMAN	DB Search	AQYGNILKH	AQYGNILKH
441	TMNEKQLFH	59.49	1146.55	9	100	9	2.7	574.283	2	20.5924	-0.3191	0.73	1021667	Neo_sh14_patient1_HLAI_0412_HM1114_tims_Slot1-36_1_3662.d	24719	0.8641	0.8737	0.0511	303	5200	1	1	1	1			5 37 8 8 28 28 26 9 5	TMNEKQLFH	Q460N5|PAR14_HUMAN	DB Search	TMNEKQLFH	TMNEKQLFH
442	FQKVITEY	38.55	1026.54	8	62.5	8	1.2	514.277	2	28.746	-0.6329	0.57	1420641	Neo_sh14_patient1_HLAI_0412_HM1114_tims_Slot1-36_1_3662.d	32625	0.8319	0.8416	0.0333			6	6	0	0			0 0 0 8 27 61 34 5	FQKVITEY	Q7KZF4|SND1_HUMAN	DB Search	FQKVITEY	FQKVITEY
443	FLDESVVKV	43.3	1034.56	9	77.8	9	3	518.291	2	45.2817	0.8201	0.84	2235073	Neo_sh14_patient1_HLAI_0412_HM1114_tims_Slot1-36_1_3662.d	48397	0.8214	0.8311	0.0437	829	11700	2	2	1	1			5 15 21 18 4 3 3 0 0	FLDESVVKV	Q01740|FMO1_HUMAN	DB Search	FLDESVVKV	FLDESVVKV
444	FLDEPTNHL	41.96	1084.52	9	77.8	9	-0.7	543.266	2	35.9536	-1.4272	0.9	1774387	Neo_sh14_patient1_HLAI_0412_HM1114_tims_Slot1-36_1_3662.d	39367	0.8423	0.852	0.0328			2	2	0	0			5 21 11 11 5 5 4 0 0	FLDEPTNHL	Q9UG63|ABCF2_HUMAN	DB Search	FLDEPTNHL	FLDEPTNHL
445	IYDEAISSF	25.23	1043.48	9	55.6	9	2.9	522.749	2	48.1453	-3.5481	0.81	2376930	Neo_sh14_patient1_HLAI_0412_HM1114_tims_Slot1-36_1_3662.d	50718	0.8114	0.821	0.0338			2	2	0	0			0 0 12 12 49 17 0 0 5	IYDEAISSF	Q9UJT0|TBE_HUMAN	DB Search	IYDEAISSF	IYDEAISSF
446	FLNSEIHQV	37.72	1085.55	9	55.6	9	2.6	543.784	2	33.3639	-1.8664	0.87	1648595	Neo_sh14_patient1_HLAI_0412_HM1114_tims_Slot1-36_1_3662.d	36587	0.878	0.8877	-0.0029			1	1	0	0			5 22 44 0 0 27 4 0 0	FLNSEIHQV	Q9BYX2|TBD2A_HUMAN	DB Search	FLNSEIHQV	FLNSEIHQV
447	FPFHSAPAL	37.74	985.502	9	88.9	9	-1.7	493.757	2	45.1547	-0.6135	0.83	2225725	Neo_sh14_patient1_HLAI_0412_HM1114_tims_Slot1-36_1_3662.d	48229	0.804	0.8137	0.0312	753	10800	2	2	1	1			5 7 5 0 26 31 4 2 5	FPFHSAPAL	O60907|TBL1X_HUMAN:Q9BQ87|TBL1Y_HUMAN:Q9BZK7|TBL1R_HUMAN	DB Search	FPFHSAPAL	FPFHSAPAL
448	HAVGPSTSL	42.96	867.445	9	77.8	9	2.4	434.731	2	19.0918	1.1838	0.8	946102	Neo_sh14_patient1_HLAI_0412_HM1114_tims_Slot1-36_1_3662.d	22594	0.7552	0.7649	0.0499	351	4050	1	1	1	1			0 0 11 20 14 14 40 32 5	HAVGPSTSL	Q99081|HTF4_HUMAN	DB Search	HAVGPSTSL	HAVGPSTSL
449	IAHDTGTSL	27.95	913.451	9	88.9	9	0.3	457.733	2	15.13	-2.3793	0.86	751281	Neo_sh14_patient1_HLAI_0412_HM1114_tims_Slot1-36_1_3662.d	16881	0.7912	0.8009	0.0139			1	1	0	0			5 7 0 19 8 8 40 16 5	IAHDTGTSL	Q9BUI4|RPC3_HUMAN	DB Search	IAHDTGTSL	IAHDTGTSL
450	M(+15.99)PHEELPSL	12.7	1067.5	9	55.6	9	-0.1	534.755	2	35.8119	2.6381	0.83	1763075	Neo_sh14_patient1_HLAI_0412_HM1114_tims_Slot1-36_1_3662.d	39071	0.852	0.8617	0.0031	350	2490	1	1	1	1	Oxidation (M)	M1:Oxidation (M):1000.00	2 2 0 0 12 42 0 0 5	M(+15.99)PHEELPSL	Q13576|IQGA2_HUMAN	DB Search	MPHEELPSL
451	TFDDLPARF	36.66	1080.52	9	55.6	9	-1.9	541.268	2	47.3128	0.9635	0.9	2335914	Neo_sh14_patient1_HLAI_0412_HM1114_tims_Slot1-36_1_3662.d	50094	0.8416	0.8513	0.0336			1	1	0	0			5 10 30 21 21 0 0 0 0	TFDDLPARF	O43567|RNF13_HUMAN	DB Search	TFDDLPARF	TFDDLPARF
452	KVYIPPIINK	24.53	1183.73	10	50	10	0.6	592.874	2	38.8332	3.1944	0.82	1917193	Neo_sh14_patient1_HLAI_0412_HM1114_tims_Slot1-36_1_3662.d	42637	0.9025	0.9122	0.0427			1	1	0	0			0 0 5 5 4 0 0 0 5 5	KVYIPPIINK	Q96RW7|HMCN1_HUMAN	DB Search	KVYIPPIINK	KVYIPPIINK
453	YPVEIHEYL	48.36	1161.57	9	77.8	9	6.7	581.796	2	46.5939	-1.0498	0.58	2300434	Neo_sh14_patient1_HLAI_0412_HM1114_tims_Slot1-36_1_3662.d	49498	0.8617	0.8714	0.0434	8360	85400	3	3	1	1			5 39 39 8 8 3 18 0 0	YPVEIHEYL	Q13901|C1D_HUMAN	DB Search	YPVEIHEYL	YPVEIHEYL
454	TPVENSHSL	43.03	982.472	9	100	9	4	492.245	2	15.2437	-0.3991	0.77	756950	Neo_sh14_patient1_HLAI_0412_HM1114_tims_Slot1-36_1_3662.d	17042	0.8067	0.8164	0.0185			1	1	0	0			5 62 68 15 8 6 6 3 3	TPVENSHSL	Q14207|NPAT_HUMAN	DB Search	TPVENSHSL	TPVENSHSL
455	YPEPRVLTL	25.46	1086.61	9	66.7	9	2.1	544.312	2	46.9425	-1.1064	0.94	2313494	Neo_sh14_patient1_HLAI_0412_HM1114_tims_Slot1-36_1_3662.d	49706	0.8637	0.8734	0.0215	362	2800	1	1	1	1			5 50 51 0 0 0 2 5 5	YPEPRVLTL	Q7Z7G8|VP13B_HUMAN	DB Search	YPEPRVLTL	YPEPRVLTL
456	TLYDHVDEV	26.23	1089.5	9	66.7	9	2.8	545.758	2	31.0167	-3.2335	0.79	1532596	Neo_sh14_patient1_HLAI_0412_HM1114_tims_Slot1-36_1_3662.d	34420	0.8532	0.8629	0.032			1	1	0	0			5 5 27 15 0 0 0 44 5	TLYDHVDEV	Q05048|CSTF1_HUMAN	DB Search	TLYDHVDEV	TLYDHVDEV
457	KTLGPILKK	33.15	996.669	9	100	9	6.1	499.345	2	13.3107	-1.4028	0.8	660426	Neo_sh14_patient1_HLAI_0412_HM1114_tims_Slot1-36_1_3662.d	14154	0.8389	0.8485	0.0363			2	2	0	0			5 57 35 23 2 2 18 18 5	KTLGPILKK	O00458|IFRD1_HUMAN	DB Search	KTLGPILKK	KTLGPILKK
458	RIYGHWVKK	52.43	1185.68	9	55.6	9	2	396.234	3	10.5022	-0.2963	0.82	519810	Neo_sh14_patient1_HLAI_0412_HM1114_tims_Slot1-36_1_3662.d	9402	0.705	0.7146	0.0402			1	1	0	0			0 0 6 6 45 11 8 0 0	RIYGHWVKK	Q16816|PHKG1_HUMAN	DB Search	RIYGHWVKK
459	HWDPQEVTL	42.88	1123.53	9	66.7	9	5.3	562.775	2	41.9766	-3.2053	0.87	2072911	Neo_sh14_patient1_HLAI_0412_HM1114_tims_Slot1-36_1_3662.d	45967	0.8365	0.8462	0.0486			1	1	0	0			0 0 0 5 5 54 56 15 5	HWDPQEVTL	Q9HBU6|EKI1_HUMAN	DB Search	HWDPQEVTL	HWDPQEVTL
460	IPSEDHQVL	29.71	1036.52	9	66.7	9	2	519.268	2	23.7248	0.4309	0.79	1176601	Neo_sh14_patient1_HLAI_0412_HM1114_tims_Slot1-36_1_3662.d	29101	0.8416	0.8513	0.0036	1480	9370	2	2	1	1			5 27 3 0 0 0 4 4 5	IPSEDHQVL	Q6PGP7|TTC37_HUMAN	DB Search	IPSEDHQVL	IPSEDHQVL
461	LADDSVRSL	32.08	974.503	9	77.8	9	5	488.261	2	24.0714	-0.2405	0.93	1197470	Neo_sh14_patient1_HLAI_0412_HM1114_tims_Slot1-36_1_3662.d	29774	0.8117	0.8214	0.0234	833	15600	2	2	1	1			5 74 27 27 5 2 0 0 2	LADDSVRSL	Q4J6C6|PPCEL_HUMAN	DB Search	LADDSVRSL	LADDSVRSL
462	MPHVPITTL	29.31	1007.55	9	66.7	9	7.1	504.785	2	47.8426	0.7825	0.76	2362005	Neo_sh14_patient1_HLAI_0412_HM1114_tims_Slot1-36_1_3662.d	50481	0.8083	0.8179	0.0369			1	1	0	0			0 0 0 50 21 21 15 15 5	MPHVPITTL	Q6KC79|NIPBL_HUMAN	DB Search	MPHVPITTL	MPHVPITTL
463	QVYKPPALK	37.09	1042.62	9	77.8	9	-2.4	522.315	2	20.3855	-1.2212	0.93	1014127	Neo_sh14_patient1_HLAI_0412_HM1114_tims_Slot1-36_1_3662.d	24523	0.873	0.8827	0.0222	987	9710	2	2	1	1			4 4 15 15 10 3 0 0 2	QVYKPPALK	Q96GY0|ZC21A_HUMAN	DB Search	QVYKPPALK
464	YAITTLHNL	31.05	1044.56	9	55.6	9	7.5	523.291	2	41.0944	-1.8636	0.79	2029769	Neo_sh14_patient1_HLAI_0412_HM1114_tims_Slot1-36_1_3662.d	45053	0.8497	0.8594	0.0154	390	6820	1	1	1	1			5 35 62 37 0 0 0 0 5	YAITTLHNL	P35222|CTNB1_HUMAN:P14923|PLAK_HUMAN	DB Search	YAITTLHNL	YAITTLHNL
465	HPNWPNHTL	35.19	1114.53	9	55.6	9	1.1	558.273	2	22.2899	1.0445	0.64	1108471	Neo_sh14_patient1_HLAI_0412_HM1114_tims_Slot1-36_1_3662.d	27067	0.8307	0.8404	0.0544			1	1	0	0			5 20 20 35 0 0 52 0 0	HPNWPNHTL	Q96PP8|GBP5_HUMAN	DB Search	HPNWPNHTL	HPNWPNHTL
466	VVYAPLSKK	34.81	1003.61	9	66.7	9	1.3	502.811	2	17.4777	-0.9289	0.8	866641	Neo_sh14_patient1_HLAI_0412_HM1114_tims_Slot1-36_1_3662.d	20245	0.8431	0.8528	0.022	343	6440	1	1	1	1			5 15 28 28 12 12 0 0 0	VVYAPLSKK	Q9NRZ9|HELLS_HUMAN	DB Search	VVYAPLSKK	VVYAPLSKK
467	VLHDRIVSV	39.57	1036.6	9	100	9	1.4	519.309	2	23.4271	0.5603	0.79	1165310	Neo_sh14_patient1_HLAI_0412_HM1114_tims_Slot1-36_1_3662.d	28826	0.8315	0.8412	0.0437			1	1	0	0			5 9 45 6 3 17 3 3 3	VLHDRIVSV	Q9ULK4|MED23_HUMAN	DB Search	VLHDRIVSV	VLHDRIVSV
468	HFDPEVVQI	24.39	1082.54	9	55.6	9	-11.9	542.271	2	45.8369	-1.1519	0.67	2263130	Neo_sh14_patient1_HLAI_0412_HM1114_tims_Slot1-36_1_3662.d	48914	0.8206	0.8303	0.0545			2	2	0	0			0 0 30 0 0 45 64 21 5	HFDPEVVQI	Q9NS73|MBIP1_HUMAN	DB Search	HFDPEVVQI	HFDPEVVQI
469	RFDESMQVF	25.63	1157.52	9	66.7	9	1.8	579.767	2	43.2254	-2.5847	0.9	2134369	Neo_sh14_patient1_HLAI_0412_HM1114_tims_Slot1-36_1_3662.d	46837	0.8768	0.8865	0.0183			1	1	0	0			0 0 0 7 9 74 95 23 5	RFDESMQVF	Q96JC1|VPS39_HUMAN	DB Search	RFDESMQVF	RFDESMQVF
470	RLYDSMKGK	43.81	1096.57	9	55.6	9	0.7	549.293	2	9.4022	1.0803	0.87	464809	Neo_sh14_patient1_HLAI_0412_HM1114_tims_Slot1-36_1_3662.d	7645	0.8679	0.8776	0.0172	2730	55000	4	4	1	1			1 1 0 0 23 25 40 12 5	RLYDSMKGK	P07355|ANXA2_HUMAN	DB Search	RLYDSMKGK	RLYDSMKGK
471	IFDEIHYM	25.38	1066.48	8	75	8	-1.3	534.246	2	47.6912	-1.1462	0.83	2354555	Neo_sh14_patient1_HLAI_0412_HM1114_tims_Slot1-36_1_3662.d	50375	0.828	0.8377	0.0371			2	2	0	0			5 88 14 10 10 8 0 0	IFDEIHYM	P42285|MTREX_HUMAN	DB Search	IFDEIHYM	IFDEIHYM
472	LFDHAVSKF	55.36	1062.55	9	100	9	3.3	532.284	2	32.0385	4.2494	0.85	1583028	Neo_sh14_patient1_HLAI_0412_HM1114_tims_Slot1-36_1_3662.d	35280	0.8396	0.8493	0.0455			3	3	0	0			5 34 25 25 26 73 34 18 5	LFDHAVSKF	O60488|ACSL4_HUMAN	DB Search	LFDHAVSKF	LFDHAVSKF
473	HPVEEEDEL	19.15	1095.47	9	77.8	9	-3.4	548.741	2	19.1921	-3.5346	0.71	949870	Neo_sh14_patient1_HLAI_0412_HM1114_tims_Slot1-36_1_3662.d	22690	0.8327	0.8423	0.0425	342	2990	1	1	1	1			0 0 2 4 6 17 50 75 5	HPVEEEDEL	O60763|USO1_HUMAN	DB Search	HPVEEEDEL	HPVEEEDEL
474	ALYDEVRTV	35.43	1064.55	9	44.4	9	4.2	533.285	2	36.2752	1.5996	0.93	1787519	Neo_sh14_patient1_HLAI_0412_HM1114_tims_Slot1-36_1_3662.d	39647	0.8373	0.847	0.0478	537	6530	1	1	1	1			1 1 77 18 11 4 0 0 0	ALYDEVRTV	A6NHR9|SMHD1_HUMAN	DB Search	ALYDEVRTV	ALYDEVRTV
475	NPIKVDPTM	39.83	1013.52	9	77.8	9	7	507.772	2	30.2974	-1.4028	0.65	1497103	Neo_sh14_patient1_HLAI_0412_HM1114_tims_Slot1-36_1_3662.d	33811	0.7939	0.8036	0.0512			1	1	0	0			5 18 18 0 0 36 15 15 5	NPIKVDPTM	Q460N5|PAR14_HUMAN	DB Search	NPIKVDPTM	NPIKVDPTM
476	LFDDKAVEI	29.22	1048.54	9	66.7	9	-2.6	525.278	2	45.0421	1.1011	0.79	2223861	Neo_sh14_patient1_HLAI_0412_HM1114_tims_Slot1-36_1_3662.d	48201	0.8338	0.8435	0.0413			1	1	0	0			5 78 22 10 0 35 73 0 0	LFDDKAVEI	Q13190|STX5_HUMAN	DB Search	LFDDKAVEI	LFDDKAVEI
477	SPHDISNVL	25.94	980.493	9	33.3	9	3.9	491.256	2	31.7736	-5.518	0.77	1569933	Neo_sh14_patient1_HLAI_0412_HM1114_tims_Slot1-36_1_3662.d	35037	0.8191	0.8288	0.0161			3	3	0	0			0 0 0 0 12 40 60 0 0	SPHDISNVL	Q92619|HMHA1_HUMAN	DB Search	SPHDISNVL	SPHDISNVL
478	EPDAVHVVL	27.52	977.518	9	44.4	9	1.1	489.767	2	40.5755	-0.4104	0.55	2003512	Neo_sh14_patient1_HLAI_0412_HM1114_tims_Slot1-36_1_3662.d	44500	0.8017	0.8114	0.0235	8830	65000	4	4	1	1			2 2 7 1 1 0 7 0 0	EPDAVHVVL	Q8NB37|GALD1_HUMAN	DB Search	EPDAVHVVL
479	ALHDLLQHV	28.25	1044.57	9	33.3	9	-5.9	523.29	2	37.9996	3.6541	0.47	1875900	Neo_sh14_patient1_HLAI_0412_HM1114_tims_Slot1-36_1_3662.d	41736	0.8652	0.8749	-0.0001			1	1	0	0			0 0 25 25 0 59 0 0 0	ALHDLLQHV	Q9Y4G6|TLN2_HUMAN	DB Search	ALHDLLQHV	ALHDLLQHV
480	HVFKPATSK	46.71	1013.57	9	66.7	9	-7.7	507.786	2	5.5353	-2.4394	0.84	271673	Neo_sh14_patient1_HLAI_0412_HM1114_tims_Slot1-36_1_3662.d	1781	0.8323	0.842	0.0329			2	2	0	0			5 37 19 19 0 3 4 0 1	HVFKPATSK	Q8IYT2|CMTR2_HUMAN	DB Search	HVFKPATSK	HVFKPATSK
481	ALWPPVREK	27.1	1094.62	9	22.2	9	6.6	548.323	2	29.1623	1.8609	0.92	1441157	Neo_sh14_patient1_HLAI_0412_HM1114_tims_Slot1-36_1_3662.d	32945	0.8792	0.8889	0.026			2	2	0	0			1 1 6 50 0 0 0 0 0	ALWPPVREK	Q9Y4C2|TCAF1_HUMAN	DB Search	ALWPPVREK	ALWPPVREK
482	LPSDTRLVL	28.17	1012.59	9	55.6	9	0.3	507.303	2	43.5359	0.4878	0.87	2145516	Neo_sh14_patient1_HLAI_0412_HM1114_tims_Slot1-36_1_3662.d	46968	0.8164	0.8261	0.0388	14600	102000	6	6	1	1			5 69 24 24 1 0 2 0 0	LPSDTRLVL	P05155|IC1_HUMAN	DB Search	LPSDTRLVL	LPSDTRLVL
483	ALHSHMINK	49.97	1049.54	9	77.8	9	2.7	525.781	2	7.075	-0.2102	0.81	345098	Neo_sh14_patient1_HLAI_0412_HM1114_tims_Slot1-36_1_3662.d	3602	0.8489	0.8586	0.0262	1890	24800	1	1	1	1			0 0 46 24 11 30 31 31 5	ALHSHMINK	Q15063|POSTN_HUMAN	DB Search	ALHSHMINK	ALHSHMINK
484	KIFSGVFVK	41.9	1023.61	9	100	9	1.3	512.814	2	33.8925	1.8859	0.88	1671109	Neo_sh14_patient1_HLAI_0412_HM1114_tims_Slot1-36_1_3662.d	37069	0.8516	0.8613	0.0235	8180	74100	2	2	1	1			5 65 30 9 3 3 17 2 2	KIFSGVFVK	Q6DKI1|RL7L_HUMAN	DB Search	KIFSGVFVK	KIFSGVFVK
485	SVYDHQGIFK	54.58	1192.59	10	80	10	2.2	597.302	2	24.3365	-0.5883	0.84	1210677	Neo_sh14_patient1_HLAI_0412_HM1114_tims_Slot1-36_1_3662.d	30129	0.9005	0.9102	0.0346			1	1	0	0			0 0 45 45 14 14 15 27 10 5	SVYDHQGIFK	Q96E22|NGBR_HUMAN	DB Search	SVYDHQGIFK	SVYDHQGIFK
486	HLDEAIHVL	20.08	1045.56	9	44.4	9	-2.2	523.784	2	36.37	1.4154	0.8	1795022	Neo_sh14_patient1_HLAI_0412_HM1114_tims_Slot1-36_1_3662.d	39806	0.8513	0.861	0.0139			1	1	0	0			5 11 0 0 0 52 0 0 5	HLDEAIHVL	P15923|TFE2_HUMAN	DB Search	HLDEAIHVL	HLDEAIHVL
487	KTFTKWVNK	43.21	1150.65	9	100	9	1.8	576.333	2	13.7091	-1.3539	0.84	677501	Neo_sh14_patient1_HLAI_0412_HM1114_tims_Slot1-36_1_3662.d	14705	0.885	0.8947	0.0302	808	10200	1	1	1	1			5 61 31 30 29 5 5 11 5	KTFTKWVNK	Q9UPN3|MACF1_HUMAN:Q15149|PLEC_HUMAN	DB Search	KTFTKWVNK	KTFTKWVNK
488	RILSGVVTK	35.46	971.613	9	55.6	9	2.9	486.815	2	18.0503	-0.0128	0.92	895040	Neo_sh14_patient1_HLAI_0412_HM1114_tims_Slot1-36_1_3662.d	21104	0.8253	0.835	0.0299	14500	155000	3	3	1	1			1 1 1 1 3 40 77 21 5	RILSGVVTK	P62280|RS11_HUMAN	DB Search	RILSGVVTK	RILSGVVTK
489	FLQPELVKL	37.1	1085.65	9	55.6	9	1.7	543.832	2	53.8233	-0.9698	0.89	2656122	Neo_sh14_patient1_HLAI_0412_HM1114_tims_Slot1-36_1_3662.d	54510	0.8706	0.8803	0.0245			1	1	0	0			3 3 29 0 0 7 7 0 0	FLQPELVKL	Q14997|PSME4_HUMAN	DB Search	FLQPELVKL	FLQPELVKL
490	IYDVQHANL	26.64	1071.53	9	44.4	9	-9.5	536.77	2	30.4488	0.4865	0.73	1504564	Neo_sh14_patient1_HLAI_0412_HM1114_tims_Slot1-36_1_3662.d	33928	0.8497	0.8594	0.0254			2	2	0	0			5 28 0 0 32 0 0 0 5	IYDVQHANL	Q9GZS3|WDR61_HUMAN	DB Search	IYDVQHANL	IYDVQHANL
491	SVFTSVRQK	23.5	1050.58	9	44.4	9	4.6	526.301	2	15.3194	1.9134	0.93	760749	Neo_sh14_patient1_HLAI_0412_HM1114_tims_Slot1-36_1_3662.d	17169	0.8462	0.8559	0.0389			1	1	0	0			0 0 95 48 11 0 0 0 5	SVFTSVRQK	P51532|SMCA4_HUMAN	DB Search	SVFTSVRQK	SVFTSVRQK
492	SLYWLSTQK	39.48	1124.59	9	55.6	9	3.3	563.302	2	41.6736	-2.0464	0.79	2057912	Neo_sh14_patient1_HLAI_0412_HM1114_tims_Slot1-36_1_3662.d	45656	0.8776	0.8873	0.0375			2	2	0	0			0 0 71 95 10 4 4 0 0	SLYWLSTQK	Q53T94|TAF1B_HUMAN	DB Search	SLYWLSTQK	SLYWLSTQK
493	SPEDGIHEL	32.89	995.456	9	55.6	9	2.7	498.737	2	24.6021	-4.9714	0.7	1224084	Neo_sh14_patient1_HLAI_0412_HM1114_tims_Slot1-36_1_3662.d	30684	0.8183	0.828	0.0068			1	1	0	0			5 22 32 19 2 1 0 0 0	SPEDGIHEL	P02751|FINC_HUMAN	DB Search	SPEDGIHEL
494	KMDEVLYSI	33.18	1096.55	9	77.8	9	7.6	549.285	2	45.9127	-1.6938	0.88	2266854	Neo_sh14_patient1_HLAI_0412_HM1114_tims_Slot1-36_1_3662.d	48966	0.8594	0.8691	0.0358			2	2	0	0			0 0 2 3 5 57 53 11 5	KMDEVLYSI	P83876|TXN4A_HUMAN	DB Search	KMDEVLYSI	KMDEVLYSI
495	SLAEGLRTV	35.47	944.529	9	44.4	9	13.8	473.278	2	30.2596	0.9782	0.93	1495236	Neo_sh14_patient1_HLAI_0412_HM1114_tims_Slot1-36_1_3662.d	33780	0.8129	0.8226	0.0123			1	1	0	0			1 1 36 24 3 2 0 0 0	SLAEGLRTV	Q9Y6K5|OAS3_HUMAN	DB Search	SLAEGLRTV	SLAEGLRTV
496	RALDHYLTL	29.76	1100.6	9	33.3	9	10	551.312	2	38.1511	0.8595	0.88	1883388	Neo_sh14_patient1_HLAI_0412_HM1114_tims_Slot1-36_1_3662.d	41880	0.8908	0.9005	0.0043			1	1	0	0			0 0 0 0 48 32 4 0 0	RALDHYLTL	Q9BWG6|SCNM1_HUMAN	DB Search	RALDHYLTL	RALDHYLTL
497	RLALKTLSK	31.05	1028.67	9	44.4	9	1.5	343.898	3	14.9028	-0.9523	0.63	739924	Neo_sh14_patient1_HLAI_0412_HM1114_tims_Slot1-36_1_3662.d	16540	0.6799	0.6895	0.0353			1	1	0	0			0 0 0 44 44 32 3 0 0	RLALKTLSK	Q2NL82|TSR1_HUMAN	DB Search	RLALKTLSK	RLALKTLSK
498	VFDEAIRAV	41.44	1018.54	9	77.8	9	0.7	510.28	2	39.8051	1.0893	0.89	1962224	Neo_sh14_patient1_HLAI_0412_HM1114_tims_Slot1-36_1_3662.d	43604	0.823	0.8327	0.0322	3010	35600	1	1	1	1			5 27 43 20 7 3 0 0 4	VFDEAIRAV	P63000|RAC1_HUMAN:P60763|RAC3_HUMAN:P15153|RAC2_HUMAN	DB Search	VFDEAIRAV	VFDEAIRAV
499	ILLEHNYAL	25.07	1084.59	9	88.9	9	-15	543.295	2	43.4903	-0.4946	0.53	2147379	Neo_sh14_patient1_HLAI_0412_HM1114_tims_Slot1-36_1_3662.d	46995	0.8784	0.8881	0.0068			1	1	0	0			5 14 6 6 0 4 25 44 5	ILLEHNYAL	O15047|SET1A_HUMAN	DB Search	ILLEHNYAL	ILLEHNYAL
500	KINDWIKLK	24.62	1156.7	9	66.7	9	9.1	579.361	2	31.925	2.1573	0.69	1577411	Neo_sh14_patient1_HLAI_0412_HM1114_tims_Slot1-36_1_3662.d	35171	0.8893	0.899	0.0359			1	1	0	0			5 42 22 6 6 32 0 0 0	KINDWIKLK	Q9NP80|PLPL8_HUMAN	DB Search	KINDWIKLK	KINDWIKLK
501	KLTDYQVTL	23.79	1079.59	9	66.7	9	7.1	540.804	2	40.9921	-0.2182	0.82	2024161	Neo_sh14_patient1_HLAI_0412_HM1114_tims_Slot1-36_1_3662.d	44953	0.8528	0.8625	0.0423			2	2	0	0			0 0 0 7 23 23 55 38 5	KLTDYQVTL	Q9H1H9|KI13A_HUMAN	DB Search	KLTDYQVTL	KLTDYQVTL
502	RITTPYMTK	43.83	1109.59	9	55.6	9	1	555.803	2	18.4257	0.5177	0.88	915843	Neo_sh14_patient1_HLAI_0412_HM1114_tims_Slot1-36_1_3662.d	21711	0.8885	0.8982	0.0067	846	8700	2	2	1	1			0 0 0 0 9 9 73 5 5	RITTPYMTK	P61218|RPAB2_HUMAN	DB Search	RITTPYMTK	RITTPYMTK
503	SALGYLHSL	22.56	959.508	9	66.7	9	-0.7	480.761	2	40.3771	-2.6259	0.86	1990402	Neo_sh14_patient1_HLAI_0412_HM1114_tims_Slot1-36_1_3662.d	44242	0.8381	0.8478	-0.0129	2260	30800	2	2	1	1			4 4 30 23 7 7 0 0 0	SALGYLHSL	O00141|SGK1_HUMAN	DB Search	SALGYLHSL	SALGYLHSL
504	KILSNVISK	40.3	1000.63	9	66.7	9	2.5	501.323	2	19.8656	-1.2888	0.9	987661	Neo_sh14_patient1_HLAI_0412_HM1114_tims_Slot1-36_1_3662.d	23761	0.8408	0.8505	0.0244			2	2	0	0			5 35 29 5 1 8 14 1 1	KILSNVISK	Q7Z401|MYCPP_HUMAN	DB Search	KILSNVISK	KILSNVISK
505	KSYMKFLKK	39.7	1171.68	9	77.8	9	2	586.848	2	13.6898	0.2838	0.58	679402	Neo_sh14_patient1_HLAI_0412_HM1114_tims_Slot1-36_1_3662.d	14770	0.9083	0.918	0.0269			2	2	0	0			5 30 43 15 15 15 27 0 0	KSYMKFLKK	Q15154|PCM1_HUMAN	DB Search	KSYMKFLKK	KSYMKFLKK
506	RIKPPWVVK	42.26	1121.71	9	55.6	9	3.2	374.911	3	24.1093	2.3258	0.7	1199358	Neo_sh14_patient1_HLAI_0412_HM1114_tims_Slot1-36_1_3662.d	29826	0.7088	0.7185	0.0363			4	4	0	0			0 0 10 23 58 15 12 0 0	RIKPPWVVK	Q8IXJ9|ASXL1_HUMAN	DB Search	RIKPPWVVK	RIKPPWVVK
507	FFDYSGRDL	30.71	1118.5	9	55.6	9	1.4	560.26	2	41.9388	-4.4508	0.92	2071040	Neo_sh14_patient1_HLAI_0412_HM1114_tims_Slot1-36_1_3662.d	45932	0.8695	0.8792	0.0257			1	1	0	0			5 34 32 23 7 0 0 0 0	FFDYSGRDL	Q13409|DC1I2_HUMAN	DB Search	FFDYSGRDL	FFDYSGRDL
508	HFDM(+15.99)AVYL	22.14	1010.45	8	75	8	9.1	506.238	2	39.477	-2.0451	0.8	1949092	Neo_sh14_patient1_HLAI_0412_HM1114_tims_Slot1-36_1_3662.d	43324	0.8063	0.816	0.0688			1	1	0	0	Oxidation (M)	M4:Oxidation (M):1000.00	0 0 2 8 46 50 3 3	HFDM(+15.99)AVYL	P55268|LAMB2_HUMAN:P07942|LAMB1_HUMAN	DB Search	HFDMAVYL	HFDMAVYL
509	HYDAVTGKF	42.9	1036.5	9	77.8	9	15	519.264	2	20.472	2.0654	0.72	1017884	Neo_sh14_patient1_HLAI_0412_HM1114_tims_Slot1-36_1_3662.d	24608	0.8323	0.842	0.0429			1	1	0	0			5 15 0 0 56 7 13 10 5	HYDAVTGKF	Q9BXJ0|C1QT5_HUMAN	DB Search	HYDAVTGKF	HYDAVTGKF
510	RIYSYVVSR	37.53	1141.62	9	44.4	9	-2.9	571.818	2	21.0021	-1.7526	0.66	1044312	Neo_sh14_patient1_HLAI_0412_HM1114_tims_Slot1-36_1_3662.d	25332	0.8904	0.9001	0.0347			2	2	0	0			5 5 1 0 1 3 4 1 1	RIYSYVVSR	Q96CS3|FAF2_HUMAN	DB Search	RIYSYVVSR	RIYSYVVSR
511	RLKEVFQTK	40.29	1147.67	9	55.6	9	4.6	383.566	3	12.9314	0.2509	0.62	641474	Neo_sh14_patient1_HLAI_0412_HM1114_tims_Slot1-36_1_3662.d	13562	0.6996	0.7092	0.0156			2	2	0	0			0 0 10 46 6 6 5 0 0	RLKEVFQTK	Q9Y6D9|MD1L1_HUMAN	DB Search	RLKEVFQTK	RLKEVFQTK
512	FAVLEDHTL	41.16	1043.53	9	66.7	9	3	522.773	2	43.9824	0.7994	0.89	2171656	Neo_sh14_patient1_HLAI_0412_HM1114_tims_Slot1-36_1_3662.d	47404	0.8423	0.852	0.0228	528	8640	2	2	1	1			5 33 67 43 24 8 0 0 0	FAVLEDHTL	Q8IVM0|CCD50_HUMAN	DB Search	FAVLEDHTL	FAVLEDHTL
513	HISTPLVSK	49.26	980.565	9	77.8	9	1	491.291	2	18.919	2.11	0.79	936663	Neo_sh14_patient1_HLAI_0412_HM1114_tims_Slot1-36_1_3662.d	22335	0.8563	0.866	-0.0011	743	6980	1	1	1	1			5 60 32 32 8 8 9 0 0	HISTPLVSK	Q8N2H9|PELI3_HUMAN	DB Search	HISTPLVSK	HISTPLVSK
514	HADDFIQEM	22.81	1104.45	9	33.3	9	5.9	553.238	2	37.9996	-3.7893	0.79	1875895	Neo_sh14_patient1_HLAI_0412_HM1114_tims_Slot1-36_1_3662.d	41731	0.8423	0.852	0.0328			1	1	0	0			0 0 0 0 19 51 18 1 1	HADDFIQEM	Q03519|TAP2_HUMAN	DB Search	HADDFIQEM	HADDFIQEM
515	KLQELNYNL	28.76	1133.61	9	66.7	9	3.1	567.813	2	38.4197	-0.6062	0.78	1894649	Neo_sh14_patient1_HLAI_0412_HM1114_tims_Slot1-36_1_3662.d	42125	0.8842	0.8939	0.0309	4140	44300	3	3	1	1			0 0 0 34 43 54 29 11 5	KLQELNYNL	P42224|STAT1_HUMAN	DB Search	KLQELNYNL	KLQELNYNL
516	STFNVFVGK	34.38	997.523	9	88.9	9	4.1	499.771	2	39.6167	-2.9808	0.79	1952859	Neo_sh14_patient1_HLAI_0412_HM1114_tims_Slot1-36_1_3662.d	43419	0.8098	0.8195	0.0254	329	3340	1	1	1	1			5 30 54 40 40 26 10 0 5	STFNVFVGK	O95302|FKBP9_HUMAN	DB Search	STFNVFVGK	STFNVFVGK
517	SVHFPLRSK	50.07	1069.6	9	44.4	9	4.1	535.811	2	17.3848	-2.1663	0.9	860938	Neo_sh14_patient1_HLAI_0412_HM1114_tims_Slot1-36_1_3662.d	20050	0.8672	0.8768	0.018	1260	9250	2	2	1	1			0 0 31 65 2 2 0 0 0	SVHFPLRSK	Q2LD37|K1109_HUMAN	DB Search	SVHFPLRSK	SVHFPLRSK
518	KVNTGLM(+15.99)TSK	33.06	1093.58	10	60	10	9.1	547.802	2	8.2279	-0.4178	0.54	406047	Neo_sh14_patient1_HLAI_0412_HM1114_tims_Slot1-36_1_3662.d	5799	0.8625	0.8722	0.0227			3	3	0	0	Oxidation (M)	M7:Oxidation (M):1000.00	5 14 12 0 0 34 34 0 0 5	KVNTGLM(+15.99)TSK	Q8N3C7|CLIP4_HUMAN	DB Search	KVNTGLMTSK	KVNTGLMTSK
519	GLNEHNHHL	43.94	1069.51	9	55.6	9	1.5	535.761	2	6.745	-1.6515	0.61	329866	Neo_sh14_patient1_HLAI_0412_HM1114_tims_Slot1-36_1_3662.d	3058	0.8703	0.88	-0.0151	392	5460	1	1	1	1			0 0 11 46 46 35 35 0 0	GLNEHNHHL	Q13363|CTBP1_HUMAN	DB Search	GLNEHNHHL	GLNEHNHHL
520	RVKYGTVFK	24.39	1096.64	9	44.4	9	3.4	366.555	3	14.1069	-1.0183	0.53	700181	Neo_sh14_patient1_HLAI_0412_HM1114_tims_Slot1-36_1_3662.d	15353	0.7131	0.7227	0.0121			1	1	0	0			0 0 0 13 23 21 19 0 0	RVKYGTVFK	Q96ST3|SIN3A_HUMAN	DB Search	RVKYGTVFK	RVKYGTVFK
521	KIFKNFKEK	26.71	1180.7	9	100	9	9.4	591.361	2	9.0617	0.2161	0.69	447739	Neo_sh14_patient1_HLAI_0412_HM1114_tims_Slot1-36_1_3662.d	7099	0.9056	0.9153	0.0296			1	1	0	0			5 35 21 21 5 5 4 7 5	KIFKNFKEK	P35606|COPB2_HUMAN	DB Search	KIFKNFKEK	KIFKNFKEK
522	RIAKNLVEK	34.08	1069.66	9	77.8	9	-1.1	535.837	2	8.9848	-1.5011	0.91	442049	Neo_sh14_patient1_HLAI_0412_HM1114_tims_Slot1-36_1_3662.d	6917	0.8714	0.8811	0.0237	479	11000	3	3	1	1			0 0 2 4 8 22 27 23 5	RIAKNLVEK	Q9H4A5|GLP3L_HUMAN	DB Search	RIAKNLVEK	RIAKNLVEK
523	KLGEIVTTI	26.86	972.586	9	55.6	9	0.7	487.3	2	41.7312	0.3426	0.83	2057895	Neo_sh14_patient1_HLAI_0412_HM1114_tims_Slot1-36_1_3662.d	45639	0.7997	0.8094	0.0454	1810	22000	3	3	1	1			0 0 0 0 3 75 55 35 5	KLGEIVTTI	P84077|ARF1_HUMAN:P84085|ARF5_HUMAN:P61204|ARF3_HUMAN:P18085|ARF4_HUMAN	DB Search	KLGEIVTTI	KLGEIVTTI
524	AAQAHTREL	36.74	995.515	9	66.7	9	8.6	498.769	2	1.259	-10.5441	0.81	62798	Neo_sh14_patient1_HLAI_0412_HM1114_tims_Slot1-36_1_3662.d	374	0.8373	0.847	0.0178			6	6	0	0			5 13 21 49 29 6 0 0 0	AAQAHTREL	O75150|BRE1B_HUMAN	DB Search	AAQAHTREL	AAQAHTREL
525	RTAFTLKQK	56.83	1091.65	9	77.8	9	-4.8	364.887	3	11.1092	0.5189	0.82	550324	Neo_sh14_patient1_HLAI_0412_HM1114_tims_Slot1-36_1_3662.d	10540	0.6818	0.6915	0.0234	1290	23500	6	6	1	1			0 0 2 68 60 53 11 5 5	RTAFTLKQK	Q7Z7L1|SLN11_HUMAN:Q68D06|SLN13_HUMAN	DB Search	RTAFTLKQK	RTAFTLKQK
526	KLSAHTHTL	49.54	1006.56	9	77.8	9	3.6	504.287	2	7.9625	-0.1608	0.8	392686	Neo_sh14_patient1_HLAI_0412_HM1114_tims_Slot1-36_1_3662.d	5290	0.8447	0.8544	0.0005			1	1	0	0			5 42 18 18 19 22 6 0 0	KLSAHTHTL	P55268|LAMB2_HUMAN	DB Search	KLSAHTHTL	KLSAHTHTL
527	KTFSEILNR	45.07	1106.61	9	66.7	9	-1	554.311	2	24.5629	-1.3232	0.95	1220238	Neo_sh14_patient1_HLAI_0412_HM1114_tims_Slot1-36_1_3662.d	30510	0.8807	0.8904	0.0144	2010	35500	1	1	1	1			5 94 58 13 13 7 1 0 0	KTFSEILNR	Q14204|DYHC1_HUMAN	DB Search	KTFSEILNR	KTFSEILNR
528	GLHSYFITV	29.28	1035.54	9	22.2	9	-2.4	518.776	2	49.5838	0.9963	0.61	2447750	Neo_sh14_patient1_HLAI_0412_HM1114_tims_Slot1-36_1_3662.d	51770	0.8664	0.8761	-0.0012			1	1	0	0			0 0 0 0 33 69 0 0 0	GLHSYFITV	Q9P2D6|F135A_HUMAN	DB Search	GLHSYFITV	GLHSYFITV
529	KTTTTIIPK	29.48	1001.61	9	55.6	9	-8.9	501.809	2	14.8271	0.8034	0.55	736136	Neo_sh14_patient1_HLAI_0412_HM1114_tims_Slot1-36_1_3662.d	16424	0.842	0.8516	0.0232			1	1	0	0			5 66 22 0 0 25 32 0 0	KTTTTIIPK	Q8N1G1|REXO1_HUMAN	DB Search	KTTTTIIPK	KTTTTIIPK
530	SIYVYKVLK	40.71	1111.66	9	44.4	9	-1.1	556.839	2	33.2735	2.7732	0.85	1642944	Neo_sh14_patient1_HLAI_0412_HM1114_tims_Slot1-36_1_3662.d	36444	0.8865	0.8962	0.0486	5860	61200	2	2	1	1			0 0 38 38 13 3 0 0 0	SIYVYKVLK	P23527|H2B1O_HUMAN:P33778|H2B1B_HUMAN:Q6DRA6|H2B2D_HUMAN:P06899|H2B1J_HUMAN:Q6DN03|H2B2C_HUMAN:Q16778|H2B2E_HUMAN:Q8N257|H2B3B_HUMAN	DB Search	SIYVYKVLK	SIYVYKVLK
531	RLASTLVHL	39.11	1008.61	9	33.3	9	0.6	505.312	2	33.7396	0.9675	0.89	1661715	Neo_sh14_patient1_HLAI_0412_HM1114_tims_Slot1-36_1_3662.d	36855	0.8582	0.8679	0.0169	1430	15400	1	1	1	1			0 0 1 1 2 22 64 0 0	RLASTLVHL	P53675|CLH2_HUMAN:Q00610|CLH1_HUMAN	DB Search	RLASTLVHL	RLASTLVHL
532	KM(+15.99)HDKVFAY	30.07	1153.56	9	55.6	9	4	577.789	2	14.3722	1.6329	0.36	713432	Neo_sh14_patient1_HLAI_0412_HM1114_tims_Slot1-36_1_3662.d	15752	0.8656	0.8753	0.0395			1	1	0	0	Oxidation (M)	M2:Oxidation (M):1000.00	5 30 12 10 0 0 0 0 5	KM(+15.99)HDKVFAY	Q5SW96|ARH_HUMAN	DB Search	KMHDKVFAY	KMHDKVFAY
533	RLYFSQQTY	36.87	1204.59	9	66.7	9	-1.6	603.3	2	32.5684	-2.0604	0.84	1609213	Neo_sh14_patient1_HLAI_0412_HM1114_tims_Slot1-36_1_3662.d	35761	0.892	0.9017	0.0432			1	1	0	0			0 0 0 27 27 55 75 18 5	RLYFSQQTY	P33897|ABCD1_HUMAN	DB Search	RLYFSQQTY	RLYFSQQTY
534	AINSKQLTY	40.93	1036.56	9	77.8	9	4.4	519.287	2	22.1763	-0.5505	0.77	1102829	Neo_sh14_patient1_HLAI_0412_HM1114_tims_Slot1-36_1_3662.d	26933	0.8253	0.835	0.0399			3	3	0	0			0 0 66 49 9 31 54 3 3	AINSKQLTY	O75365|TP4A3_HUMAN	DB Search	AINSKQLTY	AINSKQLTY
535	KLHDMIIKR	40.85	1152.68	9	100	9	11	577.354	2	12.9314	-0.259	0.86	641471	Neo_sh14_patient1_HLAI_0412_HM1114_tims_Slot1-36_1_3662.d	13559	0.9036	0.9133	0.0215			1	1	0	0			5 48 73 67 13 4 6 4 4	KLHDMIIKR	P40617|ARL4A_HUMAN	DB Search	KLHDMIIKR
536	LQRLENTQY	29.8	1163.59	9	77.8	9	-1.5	582.803	2	20.8699	-3.2483	0.78	1038640	Neo_sh14_patient1_HLAI_0412_HM1114_tims_Slot1-36_1_3662.d	25168	0.871	0.8807	0.0441	288	3400	1	1	1	1			0 0 4 3 3 41 61 40 5	LQRLENTQY	Q96D70|R3HD4_HUMAN	DB Search	LQRLENTQY	LQRLENTQY
537	YAYTGRLEL	26.72	1084.56	9	44.4	9	-2.3	543.284	2	40.8521	0.6295	0.88	2014761	Neo_sh14_patient1_HLAI_0412_HM1114_tims_Slot1-36_1_3662.d	44733	0.8501	0.8598	0.0451	1500	17700	2	2	1	1			5 48 63 22 0 0 0 0 1	YAYTGRLEL	Q96PQ7|KLHL5_HUMAN	DB Search	YAYTGRLEL	YAYTGRLEL
538	FYDDKVSAL	45.4	1056.51	9	77.8	9	0.3	529.264	2	35.5851	-0.9039	0.78	1755535	Neo_sh14_patient1_HLAI_0412_HM1114_tims_Slot1-36_1_3662.d	38875	0.8377	0.8474	0.0375	5900	75500	3	3	1	1			5 97 34 14 0 0 5 5 5	FYDDKVSAL	Q68CZ2|TENS3_HUMAN	DB Search	FYDDKVSAL	FYDDKVSAL
539	IAIDSVHQL	20.01	994.545	9	55.6	9	-1.2	498.279	2	37.5451	-2.366	0.85	1853357	Neo_sh14_patient1_HLAI_0412_HM1114_tims_Slot1-36_1_3662.d	41225	0.8447	0.8544	0.0005			1	1	0	0			5 59 59 18 0 0 0 0 4	IAIDSVHQL	Q5VT25|MRCKA_HUMAN	DB Search	IAIDSVHQL	IAIDSVHQL
540	KLIGQVHEV	39.42	1021.59	9	77.8	9	-2.9	511.802	2	19.2078	-0.6948	0.77	951750	Neo_sh14_patient1_HLAI_0412_HM1114_tims_Slot1-36_1_3662.d	22734	0.8575	0.8672	0.0177	2510	31000	1	1	1	1			5 28 30 13 13 26 4 0 0	KLIGQVHEV	Q5TBA9|FRY_HUMAN	DB Search	KLIGQVHEV	KLIGQVHEV
541	MPSPVSPKL	32.53	954.521	9	88.9	9	-0.4	478.267	2	35.5431	-0.0957	0.57	1753656	Neo_sh14_patient1_HLAI_0412_HM1114_tims_Slot1-36_1_3662.d	38832	0.8017	0.8114	0.0235	3380	41800	3	3	1	1			5 77 59 3 3 19 2 0 5	MPSPVSPKL	Q9UHB7|AFF4_HUMAN	DB Search	MPSPVSPKL	MPSPVSPKL
542	HPIDSQVAM	26.11	996.47	9	44.4	9	2.6	499.243	2	21.7977	-1.3329	0.87	1084011	Neo_sh14_patient1_HLAI_0412_HM1114_tims_Slot1-36_1_3662.d	26475	0.7912	0.8009	0.0539			2	2	0	0			0 0 0 0 0 17 57 18 5	HPIDSQVAM	O60879|DIAP2_HUMAN	DB Search	HPIDSQVAM	HPIDSQVAM
543	KMFSHQVQK	39.17	1131.59	9	100	9	2.5	566.802	2	7.5454	-0.0837	0.82	371827	Neo_sh14_patient1_HLAI_0412_HM1114_tims_Slot1-36_1_3662.d	4627	0.8675	0.8772	0.0376			1	1	0	0			5 48 38 11 4 19 34 8 5	KMFSHQVQK	Q9Y4C2|TCAF1_HUMAN	DB Search	KMFSHQVQK	KMFSHQVQK
544	VFDPVQKTL	37.11	1045.58	9	55.6	9	-0.2	523.798	2	38.5302	-3.932	0.84	1902171	Neo_sh14_patient1_HLAI_0412_HM1114_tims_Slot1-36_1_3662.d	42303	0.8241	0.8338	0.041			3	3	0	0			5 12 71 16 13 0 0 0 0	VFDPVQKTL	O94776|MTA2_HUMAN	DB Search	VFDPVQKTL	VFDPVQKTL
545	IADPSSKTL	39.35	930.502	9	77.8	9	4.7	466.261	2	19.0389	-1.4713	0.92	940460	Neo_sh14_patient1_HLAI_0412_HM1114_tims_Slot1-36_1_3662.d	22460	0.7858	0.7955	0.0294	7430	60100	4	4	1	1			5 37 40 15 5 5 0 0 5	IADPSSKTL	Q99715|COCA1_HUMAN	DB Search	IADPSSKTL	IADPSSKTL
546	LANPHELSL	35.39	992.529	9	66.7	9	-2.7	497.27	2	35.4609	-20.5123	0.67	1749922	Neo_sh14_patient1_HLAI_0412_HM1114_tims_Slot1-36_1_3662.d	38770	0.8447	0.8544	-0.0095			2	2	0	0			0 0 50 78 0 21 21 21 5	LANPHELSL	Q5TDH0|DDI2_HUMAN	DB Search	LANPHELSL	LANPHELSL
547	LPAPNHDTL	35.68	976.498	9	77.8	9	7.9	489.26	2	23.7682	-3.6791	0.93	1182293	Neo_sh14_patient1_HLAI_0412_HM1114_tims_Slot1-36_1_3662.d	29285	0.8179	0.8276	0.0072			2	2	0	0			5 38 80 14 14 0 0 3 5	LPAPNHDTL	Q6ZUM4|RHG27_HUMAN	DB Search	LPAPNHDTL	LPAPNHDTL
548	VAVNGVHSL	26.63	894.492	9	44.4	9	2.7	448.255	2	23.8818	-4.6062	0.85	1187953	Neo_sh14_patient1_HLAI_0412_HM1114_tims_Slot1-36_1_3662.d	29437	0.7928	0.8024	0.0024			1	1	0	0			5 91 91 9 0 0 0 0 1	VAVNGVHSL	O00214|LEG8_HUMAN	DB Search	VAVNGVHSL	VAVNGVHSL
549	FPVRDGVVL	34.82	1000.57	9	77.8	9	0.2	501.293	2	43.9901	-1.6108	0.86	2164180	Neo_sh14_patient1_HLAI_0412_HM1114_tims_Slot1-36_1_3662.d	47272	0.816	0.8257	0.0392	8290	30700	7	7	1	1			5 22 3 0 0 7 15 31 5	FPVRDGVVL	Q8NF64|ZMIZ2_HUMAN:Q9ULJ6|ZMIZ1_HUMAN	DB Search	FPVRDGVVL
550	KLQEQIHRV	28.59	1149.66	9	77.8	9	4.9	575.841	2	11.7164	0.3311	0.84	580709	Neo_sh14_patient1_HLAI_0412_HM1114_tims_Slot1-36_1_3662.d	11549	0.8873	0.897	0.0278			1	1	0	0			5 23 19 15 6 6 0 0 5	KLQEQIHRV	O60293|ZC3H1_HUMAN	DB Search	KLQEQIHRV	KLQEQIHRV
551	NAIPTSRSL	35.31	957.524	9	33.3	9	2.1	479.77	2	22.4826	0.0073	0.97	1116053	Neo_sh14_patient1_HLAI_0412_HM1114_tims_Slot1-36_1_3662.d	27305	0.8028	0.8125	0.0223	389	5130	1	1	1	1			1 1 9 9 2 0 0 0 0	NAIPTSRSL	Q9NR99|MXRA5_HUMAN	DB Search	NAIPTSRSL	NAIPTSRSL
552	VYDTNPAKF	35.72	1053.51	9	55.6	9	12.1	527.77	2	24.5641	-1.3724	0.85	1222184	Neo_sh14_patient1_HLAI_0412_HM1114_tims_Slot1-36_1_3662.d	30620	0.842	0.8516	0.0232			1	1	0	0			5 94 36 20 20 0 0 0 0	VYDTNPAKF	Q9NZD2|GLTP_HUMAN	DB Search	VYDTNPAKF	VYDTNPAKF
553	HPLAGIVAL	29.24	889.538	9	77.8	9	1.9	445.777	2	49.1673	1.8193	0.69	2427266	Neo_sh14_patient1_HLAI_0412_HM1114_tims_Slot1-36_1_3662.d	51482	0.7812	0.7908	0.044			2	2	0	0			0 0 7 3 3 52 83 39 5	HPLAGIVAL	O95372|LYPA2_HUMAN	DB Search	HPLAGIVAL
554	HPSEGGQVL	32.94	922.451	9	55.6	9	-1	462.232	2	15.0544	-1.0774	0.93	747505	Neo_sh14_patient1_HLAI_0412_HM1114_tims_Slot1-36_1_3662.d	16777	0.7719	0.7815	0.0433			1	1	0	0			0 0 0 0 5 10 26 15 5	HPSEGGQVL	Q86VP3|PACS2_HUMAN	DB Search	HPSEGGQVL	HPSEGGQVL
555	MADPNIRFL	43.09	1075.55	9	77.8	9	-2.3	538.78	2	48.221	2.2016	0.88	2380654	Neo_sh14_patient1_HLAI_0412_HM1114_tims_Slot1-36_1_3662.d	50770	0.8547	0.8644	0.0204			1	1	0	0			5 17 25 15 6 3 0 0 5	MADPNIRFL	Q86WV6|STING_HUMAN	DB Search	MADPNIRFL	MADPNIRFL
556	SVYSPVKKK	42.38	1034.61	9	66.7	9	6.1	518.317	2	6.3829	-0.6092	0.93	309073	Neo_sh14_patient1_HLAI_0412_HM1114_tims_Slot1-36_1_3662.d	2461	0.8482	0.8578	0.027	6480	67600	5	5	1	1			2 2 71 71 5 5 1 0 1	SVYSPVKKK	O15504|NUP42_HUMAN	DB Search	SVYSPVKKK	SVYSPVKKK
557	HYDEQQNFF	23.72	1226.5	9	55.6	9	-3.9	614.255	2	33.5155	-4.3559	0.83	1656087	Neo_sh14_patient1_HLAI_0412_HM1114_tims_Slot1-36_1_3662.d	36735	0.8889	0.8986	0.0363			3	3	0	0			0 0 2 12 53 90 78 0 0	HYDEQQNFF	Q9NWT6|HIF1N_HUMAN	DB Search	HYDEQQNFF	HYDEQQNFF
558	LPLPSHVSL	27.92	961.56	9	55.6	9	3.3	481.789	2	48.1075	1.5219	0.86	2375064	Neo_sh14_patient1_HLAI_0412_HM1114_tims_Slot1-36_1_3662.d	50688	0.7966	0.8063	0.0285			3	3	0	0			5 22 22 8 3 0 0 0 0	LPLPSHVSL	P09619|PGFRB_HUMAN	DB Search	LPLPSHVSL
559	HPIRVVNAL	34.81	1017.61	9	44.4	9	6.9	509.815	2	24.0335	0.8715	0.78	1195530	Neo_sh14_patient1_HLAI_0412_HM1114_tims_Slot1-36_1_3662.d	29670	0.8218	0.8315	0.0533	1970	21000	3	3	1	1			5 8 5 1 1 1 4 0 0	HPIRVVNAL	Q5T2E6|ARMD3_HUMAN	DB Search	HPIRVVNAL	HPIRVVNAL
560	KVYYPKYLSK	40.57	1287.72	10	60	10	6.3	644.873	2	19.8656	1.1755	0.82	987622	Neo_sh14_patient1_HLAI_0412_HM1114_tims_Slot1-36_1_3662.d	23722	0.9611	0.9708	0.0141	2930	12100	4	4	1	1			5 29 25 25 22 18 0 0 0 0	KVYYPKYLSK	Q8NHP6|MSPD2_HUMAN	DB Search	KVYYPKYLSK	KVYYPKYLSK
561	KLYEQLSGK	37.56	1064.59	9	77.8	9	3.3	533.302	2	15.6931	-0.5006	0.86	777706	Neo_sh14_patient1_HLAI_0412_HM1114_tims_Slot1-36_1_3662.d	17602	0.8365	0.8462	0.0486	6030	67300	2	2	1	1			5 50 32 0 0 3 2 3 5	KLYEQLSGK	P30086|PEBP1_HUMAN	DB Search	KLYEQLSGK	KLYEQLSGK
562	LPSPSEHKL	37.79	1006.54	9	77.8	9	-3.8	504.278	2	18.2724	2.4478	0.89	906395	Neo_sh14_patient1_HLAI_0412_HM1114_tims_Slot1-36_1_3662.d	21443	0.8292	0.8389	0.016	175	2830	1	1	1	1			5 59 88 12 4 4 6 0 0	LPSPSEHKL	Q8TER5|ARH40_HUMAN	DB Search	LPSPSEHKL
563	SPAPTHNSL	25.23	922.451	9	66.7	9	-5.3	462.23	2	13.2727	-0.8127	0.94	658520	Neo_sh14_patient1_HLAI_0412_HM1114_tims_Slot1-36_1_3662.d	14084	0.7746	0.7842	0.0206			1	1	0	0			5 7 55 22 22 6 0 0 0	SPAPTHNSL	P49327|FAS_HUMAN	DB Search	SPAPTHNSL	SPAPTHNSL
564	IFDLQKTSL	39.33	1063.59	9	77.8	9	-0.2	532.803	2	45.9505	-0.2353	0.73	2268715	Neo_sh14_patient1_HLAI_0412_HM1114_tims_Slot1-36_1_3662.d	48991	0.8385	0.8482	0.0467			2	2	0	0			5 26 8 7 30 0 0 7 5	IFDLQKTSL	Q6DN12|MCTP2_HUMAN	DB Search	IFDLQKTSL	IFDLQKTSL
565	LPSLSAHEL	20.9	965.518	9	77.8	9	-3	483.765	2	39.6437	0.6179	0.86	1952869	Neo_sh14_patient1_HLAI_0412_HM1114_tims_Slot1-36_1_3662.d	43429	0.8133	0.823	0.0119	758	7150	2	2	1	1			5 57 26 18 2 2 0 0 4	LPSLSAHEL	Q9BZ67|FRMD8_HUMAN	DB Search	LPSLSAHEL	LPSLSAHEL
566	MPTTERVTL	41.62	1046.54	9	55.6	9	4.8	524.281	2	31.3196	-3.2623	0.86	1547536	Neo_sh14_patient1_HLAI_0412_HM1114_tims_Slot1-36_1_3662.d	34672	0.8121	0.8218	0.053			2	2	0	0			5 99 53 12 9 0 1 0 0	MPTTERVTL	P29466|CASP1_HUMAN	DB Search	MPTTERVTL
567	VWDTKEVQM	31.86	1134.54	9	66.7	9	0.9	568.277	2	33.7168	-1.7864	0.79	1663608	Neo_sh14_patient1_HLAI_0412_HM1114_tims_Slot1-36_1_3662.d	36912	0.8722	0.8819	0.023			3	3	0	0			5 6 23 0 0 0 29 8 5	VWDTKEVQM	Q9BZH6|WDR11_HUMAN	DB Search	VWDTKEVQM	VWDTKEVQM
568	MPAPHTSITM	38.63	1084.5	10	100	10	-4.8	543.257	2	32.8335	1.7883	0.69	1622325	Neo_sh14_patient1_HLAI_0412_HM1114_tims_Slot1-36_1_3662.d	36021	0.8474	0.8571	0.0178			1	1	0	0			5 32 32 10 5 6 6 25 25 5	MPAPHTSITM	Q562E7|WDR81_HUMAN	DB Search	MPAPHTSITM	MPAPHTSITM
569	M(+15.99)LDPLEVHL	20.06	1081.55	9	33.3	9	-2.9	541.78	2	53.5958	-0.5531	0.75	2644856	Neo_sh14_patient1_HLAI_0412_HM1114_tims_Slot1-36_1_3662.d	54260	0.9013	0.911	-0.0161			1	1	0	0	Oxidation (M)	M1:Oxidation (M):1000.00	0 0 26 32 18 0 0 0 0	M(+15.99)LDPLEVHL	Q6P2Q9|PRP8_HUMAN	DB Search	MLDPLEVHL	MLDPLEVHL
570	KLIEKNYFL	17.99	1166.67	9	33.3	9	-0.1	584.342	2	36.7108	0.1772	0.35	1811932	Neo_sh14_patient1_HLAI_0412_HM1114_tims_Slot1-36_1_3662.d	40192	0.8947	0.9044	0.0505			1	1	0	0			0 0 26 26 10 0 0 0 0	KLIEKNYFL	Q9NVP1|DDX18_HUMAN	DB Search	KLIEKNYFL	KLIEKNYFL
571	KTFEGNLTTK	54.14	1137.6	10	100	10	0.5	569.809	2	14.4165	-0.1373	0.94	713402	Neo_sh14_patient1_HLAI_0412_HM1114_tims_Slot1-36_1_3662.d	15722	0.8765	0.8862	0.0287	11600	138000	2	2	1	1			5 88 51 34 8 8 11 15 16 5	KTFEGNLTTK	Q6P2Q9|PRP8_HUMAN	DB Search	KTFEGNLTTK	KTFEGNLTTK
572	LPSDKALVL	38.05	954.575	9	100	9	1.8	478.296	2	41.643	-0.9545	0.7	2054133	Neo_sh14_patient1_HLAI_0412_HM1114_tims_Slot1-36_1_3662.d	45549	0.8071	0.8168	0.0281	13300	134000	5	5	1	1			5 50 8 8 7 7 53 12 5	LPSDKALVL	Q03001|DYST_HUMAN	DB Search	LPSDKALVL	LPSDKALVL
573	TAAAGTHVL	19.54	839.45	9	66.7	9	10.9	420.737	2	16.8721	-6.6408	0.78	838193	Neo_sh14_patient1_HLAI_0412_HM1114_tims_Slot1-36_1_3662.d	19337	0.7463	0.756	0.0288			1	1	0	0			5 15 19 19 7 7 0 0 0	TAAAGTHVL	Q96KV7|WDR90_HUMAN	DB Search	TAAAGTHVL
574	KISTVVSSK	30.56	947.565	9	100	9	11.7	474.795	2	9.8196	-0.2062	0.89	485663	Neo_sh14_patient1_HLAI_0412_HM1114_tims_Slot1-36_1_3662.d	8303	0.7932	0.8028	0.042			3	3	0	0			5 38 15 10 10 2 2 4 4	KISTVVSSK	P37108|SRP14_HUMAN	DB Search	KISTVVSSK	KISTVVSSK
575	KLLKTSMLK	33.52	1060.67	9	88.9	9	5.5	531.344	2	16.3417	2.2563	0.86	811734	Neo_sh14_patient1_HLAI_0412_HM1114_tims_Slot1-36_1_3662.d	18582	0.8881	0.8978	0.0171			1	1	0	0			5 49 60 51 12 0 7 34 5	KLLKTSMLK	O60313|OPA1_HUMAN	DB Search	KLLKTSMLK	KLLKTSMLK
576	RIYLGLHEK	33.12	1127.65	9	55.6	9	-6.3	564.826	2	18.729	1.1283	0.83	930992	Neo_sh14_patient1_HLAI_0412_HM1114_tims_Slot1-36_1_3662.d	22172	0.8935	0.9032	0.0316			1	1	0	0			0 0 0 0 4 27 8 7 5	RIYLGLHEK	Q7Z2Y5|NRK_HUMAN	DB Search	RIYLGLHEK
577	RLLVQILQK	30.53	1109.73	9	77.8	9	-0.2	555.871	2	38.2723	0.4454	0.88	1887146	Neo_sh14_patient1_HLAI_0412_HM1114_tims_Slot1-36_1_3662.d	41966	0.866	0.8757	0.0592	389	6970	1	1	1	1			2 1 1 4 32 76 86 28 5	RLLVQILQK	P08949|NMB_HUMAN	DB Search	RLLVQILQK	RLLVQILQK
578	SPTKLDVTL	35.27	972.549	9	100	9	-0.3	487.282	2	37.9545	-6.9748	0.86	1874001	Neo_sh14_patient1_HLAI_0412_HM1114_tims_Slot1-36_1_3662.d	41673	0.7862	0.7959	0.059	2160	30700	2	2	1	1			5 5 20 14 15 24 90 25 5	SPTKLDVTL	P27816|MAP4_HUMAN	DB Search	SPTKLDVTL	SPTKLDVTL
579	HWDEVKEEM	33.24	1201.51	9	55.6	9	1.2	601.762	2	22.7001	0.0848	0.66	1127394	Neo_sh14_patient1_HLAI_0412_HM1114_tims_Slot1-36_1_3662.d	27630	0.8788	0.8885	0.0464	269	4960	1	1	1	1			5 8 0 0 13 4 0 0 4	HWDEVKEEM	Q16644|MAPK3_HUMAN	DB Search	HWDEVKEEM	HWDEVKEEM
580	AFDVAEREF	38.24	1082.5	9	55.6	9	1.5	542.26	2	38.5904	-2.3955	0.91	1902170	Neo_sh14_patient1_HLAI_0412_HM1114_tims_Slot1-36_1_3662.d	42302	0.8485	0.8582	0.0266	1810	20900	1	1	1	1			5 10 43 43 19 1 0 0 1	AFDVAEREF	O94851|MICA2_HUMAN	DB Search	AFDVAEREF
581	ALSSYVVKK	31.98	993.586	9	55.6	9	0.8	497.801	2	17.0574	-0.2393	0.9	845786	Neo_sh14_patient1_HLAI_0412_HM1114_tims_Slot1-36_1_3662.d	19586	0.8389	0.8485	0.0163	287	5070	2	2	1	1			4 4 18 0 0 3 3 0 0	ALSSYVVKK	O95714|HERC2_HUMAN	DB Search	ALSSYVVKK	ALSSYVVKK
582	QPASFAVSL	17.04	918.481	9	55.6	9	-2.8	919.486	1	51.9303	-0.576	0.76	2563011	Neo_sh14_patient1_HLAI_0412_HM1114_tims_Slot1-36_1_3662.d	53199	1.1285	1.1382	0.0866			2	2	0	0			3 0 0 0 0 6 23 8 5	QPASFAVSL	P21333|FLNA_HUMAN	DB Search	QPASFAVSL	QPASFAVSL
583	HPHDLVILM	37.52	1073.57	9	66.7	9	-0.8	537.791	2	43.4146	1.1777	0.72	2143654	Neo_sh14_patient1_HLAI_0412_HM1114_tims_Slot1-36_1_3662.d	46942	0.873	0.8827	0.0122			2	2	0	0			3 0 0 0 13 77 26 12 5	HPHDLVILM	Q96AE7|TTC17_HUMAN	DB Search	HPHDLVILM	HPHDLVILM
584	ILHENFTTV	28.06	1072.56	9	44.4	9	8.4	537.289	2	35.12	-0.4285	0.66	1733037	Neo_sh14_patient1_HLAI_0412_HM1114_tims_Slot1-36_1_3662.d	38409	0.847	0.8567	0.0282			2	2	0	0			0 0 0 24 37 37 4 0 0	ILHENFTTV	O43237|DC1L2_HUMAN	DB Search	ILHENFTTV	ILHENFTTV
585	RTLQQMLLK	28.2	1129.66	9	66.7	9	7.9	565.844	2	30.6381	4.0864	0.81	1513891	Neo_sh14_patient1_HLAI_0412_HM1114_tims_Slot1-36_1_3662.d	34075	0.8896	0.8993	0.0355			2	2	0	0			0 0 0 6 13 44 85 21 5	RTLQQMLLK	Q14573|ITPR3_HUMAN	DB Search	RTLQQMLLK	RTLQQMLLK
586	KTDPKMLSK	41.71	1046.58	9	77.8	9	2	524.298	2	6.7103	-2.9133	0.83	329888	Neo_sh14_patient1_HLAI_0412_HM1114_tims_Slot1-36_1_3662.d	3080	0.8261	0.8358	0.0391			1	1	0	0			5 23 23 7 7 1 0 5 5	KTDPKMLSK	Q9UBD5|ORC3_HUMAN	DB Search	KTDPKMLSK	KTDPKMLSK
587	KVHIVVTSK	42.96	1009.63	9	100	9	0.6	505.822	2	10.3504	2.1775	0.79	512220	Neo_sh14_patient1_HLAI_0412_HM1114_tims_Slot1-36_1_3662.d	9156	0.8272	0.8369	0.0379			1	1	0	0			5 25 47 47 12 17 10 8 5	KVHIVVTSK	Q99715|COCA1_HUMAN	DB Search	KVHIVVTSK	KVHIVVTSK
588	SILSNIHEV	26.14	1010.54	9	66.7	9	5.5	506.28	2	40.2767	1.8271	0.88	1988511	Neo_sh14_patient1_HLAI_0412_HM1114_tims_Slot1-36_1_3662.d	44187	0.8637	0.8734	-0.0185	7080	75900	2	2	1	1			2 2 64 18 11 11 0 0 0	SILSNIHEV	O95477|ABCA1_HUMAN	DB Search	SILSNIHEV	SILSNIHEV
589	VLSERLLHK	46.21	1093.66	9	100	9	1.6	547.838	2	17.7777	1.5531	0.85	879900	Neo_sh14_patient1_HLAI_0412_HM1114_tims_Slot1-36_1_3662.d	20652	0.8598	0.8695	0.0654	2740	36600	3	3	1	1			5 40 6 4 3 9 11 38 5	VLSERLLHK	Q96AZ6|ISG20_HUMAN	DB Search	VLSERLLHK	VLSERLLHK
590	SPEHVIQAL	32.44	992.529	9	55.6	9	3	497.273	2	33.1745	-2.9577	0.75	1639190	Neo_sh14_patient1_HLAI_0412_HM1114_tims_Slot1-36_1_3662.d	36362	0.8044	0.8141	0.0308			3	3	0	0			0 0 0 0 50 96 34 34 5	SPEHVIQAL	Q01658|NC2B_HUMAN	DB Search	SPEHVIQAL
591	KLLSKFYEL	15.56	1139.66	9	55.6	9	8.7	570.842	2	40.5755	-0.7686	0.31	2003519	Neo_sh14_patient1_HLAI_0412_HM1114_tims_Slot1-36_1_3662.d	44507	0.9102	0.9199	0.0249			1	1	0	0			5 0 0 17 0 0 25 30 5	KLLSKFYEL	Q86UV5|UBP48_HUMAN	DB Search	KLLSKFYEL	KLLSKFYEL
592	VLYKVGFFK	47.02	1099.64	9	66.7	9	3.2	550.831	2	39.78	0.7099	0.82	1964110	Neo_sh14_patient1_HLAI_0412_HM1114_tims_Slot1-36_1_3662.d	43654	0.8803	0.89	0.0448			1	1	0	0			5 37 39 39 17 1 2 0 0	VLYKVGFFK	P20702|ITAX_HUMAN:P20701|ITAL_HUMAN	DB Search	VLYKVGFFK
593	HPTSHVSLL	46.02	989.529	9	55.6	9	-3.3	495.77	2	20.9318	1.1895	0.9	1038642	Neo_sh14_patient1_HLAI_0412_HM1114_tims_Slot1-36_1_3662.d	25170	0.8284	0.8381	0.0168	446	5520	1	1	1	1			5 10 0 0 32 23 23 1 1	HPTSHVSLL	Q9NVR0|KLH11_HUMAN	DB Search	HPTSHVSLL	HPTSHVSLL
594	HLRPESHSY	48.66	1124.54	9	66.7	9	4.8	563.278	2	8.2328	-0.713	0.7	404126	Neo_sh14_patient1_HLAI_0412_HM1114_tims_Slot1-36_1_3662.d	5714	0.8749	0.8846	0.0202	703	14200	3	3	1	1			5 20 1 0 0 44 75 41 5	HLRPESHSY	Q9Y618|NCOR2_HUMAN	DB Search	HLRPESHSY	HLRPESHSY
595	KLNNRQLNY	46.67	1161.63	9	88.9	9	4.3	581.823	2	14.4488	0.0214	0.85	715308	Neo_sh14_patient1_HLAI_0412_HM1114_tims_Slot1-36_1_3662.d	15792	0.8811	0.8908	0.034	18100	232000	6	6	1	1			5 56 19 9 0 14 14 26 5	KLNNRQLNY	Q12792|TWF1_HUMAN	DB Search	KLNNRQLNY	KLNNRQLNY
596	SVAGKIHTV	40.15	910.524	9	77.8	9	4.5	456.271	2	13.2743	0.5054	0.93	656613	Neo_sh14_patient1_HLAI_0412_HM1114_tims_Slot1-36_1_3662.d	14013	0.8179	0.8276	-0.0128	2970	53400	1	1	1	1			3 3 30 11 11 18 4 1 1	SVAGKIHTV	Q9Y6Q2|STON1_HUMAN	DB Search	SVAGKIHTV	SVAGKIHTV
597	KLSSNITVK	26.51	988.592	9	66.7	9	7.8	495.307	2	14.0313	1.701	0.68	696422	Neo_sh14_patient1_HLAI_0412_HM1114_tims_Slot1-36_1_3662.d	15266	0.8086	0.8183	0.0465			1	1	0	0			5 11 0 0 0 7 11 14 5	KLSSNITVK	Q96CJ1|EAF2_HUMAN	DB Search	KLSSNITVK	KLSSNITVK
598	RTYKSPLRH	42.41	1156.65	9	44.4	9	3.1	386.557	3	6.711	0.2042	0.86	327997	Neo_sh14_patient1_HLAI_0412_HM1114_tims_Slot1-36_1_3662.d	3025	0.7479	0.7575	-0.0227	1480	22400	4	4	2	2			0 0 2 40 57 58 0 0 0	RTYKSPLRH	Q6ICC9|RTL6_HUMAN	DB Search	RTYKSPLRH	RTYKSPLRH
599	SLSDTVEKL	33.92	990.523	9	55.6	9	0.3	496.269	2	35.4609	-1.6522	0.89	1749903	Neo_sh14_patient1_HLAI_0412_HM1114_tims_Slot1-36_1_3662.d	38751	0.8098	0.8195	0.0354			2	2	0	0			0 0 4 4 3 2 5 0 0	SLSDTVEKL	Q14203|DCTN1_HUMAN	DB Search	SLSDTVEKL	SLSDTVEKL
600	KTNLTSVTK	25.85	990.571	9	66.7	9	-0.8	496.292	2	9.2892	-3.7793	0.75	459123	Neo_sh14_patient1_HLAI_0412_HM1114_tims_Slot1-36_1_3662.d	7467	0.8114	0.821	0.0338			1	1	0	0			5 76 20 10 7 0 0 0 2	KTNLTSVTK	P42858|HD_HUMAN	DB Search	KTNLTSVTK	KTNLTSVTK
601	SLTGHISTV	19.76	913.487	9	55.6	9	-0.9	457.75	2	23.465	-2.9839	0.76	1167180	Neo_sh14_patient1_HLAI_0412_HM1114_tims_Slot1-36_1_3662.d	28860	0.7885	0.7982	0.0267			1	1	0	0			0 0 13 0 0 13 13 14 5	SLTGHISTV	O43660|PLRG1_HUMAN	DB Search	SLTGHISTV	SLTGHISTV
602	KANAHFILK	34.18	1040.61	9	77.8	9	2.1	521.315	2	14.5298	0.6601	0.69	719118	Neo_sh14_patient1_HLAI_0412_HM1114_tims_Slot1-36_1_3662.d	15930	0.8513	0.861	0.0339	238	4130	1	1	1	1			5 31 15 15 0 0 71 22 5	KANAHFILK	O95071|UBR5_HUMAN	DB Search	KANAHFILK	KANAHFILK
603	NPLHLDYVM	19.3	1100.53	9	66.7	9	2.2	551.275	2	49.1302	-1.0281	0.95	2421669	Neo_sh14_patient1_HLAI_0412_HM1114_tims_Slot1-36_1_3662.d	51393	0.8412	0.8509	0.044	579	5790	1	1	1	1			0 0 0 3 25 30 90 23 5	NPLHLDYVM	P22314|UBA1_HUMAN	DB Search	NPLHLDYVM	NPLHLDYVM
604	TTNDIVISK	23.03	989.539	9	55.6	9	6.1	495.78	2	19.3731	-0.1461	0.73	963120	Neo_sh14_patient1_HLAI_0412_HM1114_tims_Slot1-36_1_3662.d	23088	0.7955	0.8052	0.0397			3	3	0	0			5 16 43 8 8 0 0 0 0	TTNDIVISK	Q13123|RED_HUMAN	DB Search	TTNDIVISK	TTNDIVISK
605	SVDGPVSQK	29.99	915.466	9	55.6	9	-1.3	458.74	2	9.7439	-1.2586	0.86	481860	Neo_sh14_patient1_HLAI_0412_HM1114_tims_Slot1-36_1_3662.d	8172	0.7684	0.7781	0.0268			2	2	0	0			2 2 21 5 0 0 2 0 0	SVDGPVSQK	Q96HI0|SENP5_HUMAN	DB Search	SVDGPVSQK	SVDGPVSQK
606	FGAFHSPAL	42.45	945.471	9	100	9	0	473.743	2	41.6449	0.7039	0.72	2052265	Neo_sh14_patient1_HLAI_0412_HM1114_tims_Slot1-36_1_3662.d	45517	0.7993	0.809	0.0258	1420	13800	1	1	1	1			5 24 11 11 8 11 4 3 5	FGAFHSPAL	Q9NZN4|EHD2_HUMAN	DB Search	FGAFHSPAL	FGAFHSPAL
607	KTHAVILSR	44.85	1023.62	9	66.7	9	5.2	512.819	2	10.166	1.4704	0.81	500863	Neo_sh14_patient1_HLAI_0412_HM1114_tims_Slot1-36_1_3662.d	8815	0.8454	0.8551	0.0297	722	14500	1	1	1	1			5 38 83 41 22 1 1 0 2	KTHAVILSR	Q96FV2|SCRN2_HUMAN	DB Search	KTHAVILSR	KTHAVILSR
608	GTLPHPLQR	34.34	1017.57	9	55.6	9	1.7	509.794	2	19.0322	-3.8346	0.85	946100	Neo_sh14_patient1_HLAI_0412_HM1114_tims_Slot1-36_1_3662.d	22592	0.8478	0.8575	0.0174			1	1	0	0			0 0 13 52 52 4 3 0 0	GTLPHPLQR	P37088|SCNNA_HUMAN	DB Search	GTLPHPLQR
609	KLLDAYLLY	23.73	1110.63	9	66.7	9	5	556.326	2	54.1647	-2.291	0.91	2673113	Neo_sh14_patient1_HLAI_0412_HM1114_tims_Slot1-36_1_3662.d	54977	0.8695	0.8792	0.0457			1	1	0	0			0 0 0 2 4 11 96 10 5	KLLDAYLLY	P61803|DAD1_HUMAN	DB Search	KLLDAYLLY	KLLDAYLLY
610	RLQHQQLYY	24.44	1247.64	9	44.4	9	-13.7	624.819	2	18.9565	0.4556	0.64	942314	Neo_sh14_patient1_HLAI_0412_HM1114_tims_Slot1-36_1_3662.d	22478	0.925	0.9347	0.0302			2	2	0	0			0 0 0 8 37 12 12 0 0	RLQHQQLYY	Q99569|PKP4_HUMAN	DB Search	RLQHQQLYY	RLQHQQLYY
611	IMRELDVSY	38.26	1124.55	9	66.7	9	3.9	563.286	2	37.8101	-2.101	0.92	1866479	Neo_sh14_patient1_HLAI_0412_HM1114_tims_Slot1-36_1_3662.d	41495	0.8644	0.8741	0.0407			2	2	0	0			3 3 0 0 0 4 31 9 5	IMRELDVSY	P46977|STT3A_HUMAN	DB Search	IMRELDVSY	IMRELDVSY
612	RVLPYPFTH	39.78	1128.61	9	66.7	9	1	565.312	2	37.7914	3.351	0.83	1859006	Neo_sh14_patient1_HLAI_0412_HM1114_tims_Slot1-36_1_3662.d	41366	0.9021	0.9118	0.0131	4450	25500	3	3	1	1			0 0 0 4 5 5 7 12 5	RVLPYPFTH	Q9BVJ6|UT14A_HUMAN	DB Search	RVLPYPFTH	RVLPYPFTH
613	KTDEYFRMK	36.66	1216.59	9	66.7	9	4.6	609.306	2	16.1902	0.4263	0.77	804181	Neo_sh14_patient1_HLAI_0412_HM1114_tims_Slot1-36_1_3662.d	18373	0.9222	0.932	0.0129			1	1	0	0			5 49 26 20 5 1 1 0 5	KTDEYFRMK	Q8TC07|TBC15_HUMAN:Q9HA65|TBC17_HUMAN	DB Search	KTDEYFRMK	KTDEYFRMK
614	VLNHHQLGY	29.02	1079.55	9	55.6	9	2	540.784	2	16.7963	2.7726	0.75	834407	Neo_sh14_patient1_HLAI_0412_HM1114_tims_Slot1-36_1_3662.d	19223	0.8652	0.8749	0.0099			1	1	0	0			2 2 0 0 3 8 2 1 1	VLNHHQLGY	Q86TJ5|ZN554_HUMAN	DB Search	VLNHHQLGY	VLNHHQLGY
615	RTSTSTLLH	40.03	1014.55	9	55.6	9	0.7	508.281	2	12.6168	0.1991	0.8	624430	Neo_sh14_patient1_HLAI_0412_HM1114_tims_Slot1-36_1_3662.d	13042	0.8292	0.8389	0.036	4770	66800	2	2	1	1			1 1 0 0 3 3 35 78 5	RTSTSTLLH	Q14157|UBP2L_HUMAN	DB Search	RTSTSTLLH	RTSTSTLLH
616	VVNSQTLLH	36.13	1009.56	9	55.6	9	6.1	505.788	2	23.4271	0.5603	0.82	1165326	Neo_sh14_patient1_HLAI_0412_HM1114_tims_Slot1-36_1_3662.d	28842	0.8237	0.8334	0.0414			3	3	0	0			5 18 10 9 9 0 0 0 0	VVNSQTLLH	Q68CP9|ARID2_HUMAN	DB Search	VVNSQTLLH	VVNSQTLLH
617	QIASFILLR	34.39	1059.64	9	77.8	9	-1.2	530.829	2	54.013	-1.4734	0.92	2665551	Neo_sh14_patient1_HLAI_0412_HM1114_tims_Slot1-36_1_3662.d	54759	0.8625	0.8722	0.0227			1	1	0	0			5 21 46 28 28 14 0 0 4	QIASFILLR	Q9NUV9|GIMA4_HUMAN	DB Search	QIASFILLR	QIASFILLR
618	KTYGEIFEKF	54.23	1260.64	10	80	10	0.1	631.327	2	39.6111	0.9396	0.78	1950968	Neo_sh14_patient1_HLAI_0412_HM1114_tims_Slot1-36_1_3662.d	43364	0.9339	0.9436	0.0312	11300	104000	3	3	1	1			5 58 58 8 8 56 54 54 0 0	KTYGEIFEKF	O95298|NDUC2_HUMAN	DB Search	KTYGEIFEKF	KTYGEIFEKF
619	YYDGKVM(+15.99)KL	36.2	1131.56	9	100	9	-1.6	566.788	2	18.2741	-0.4477	0.79	908289	Neo_sh14_patient1_HLAI_0412_HM1114_tims_Slot1-36_1_3662.d	21501	0.8761	0.8858	0.0391			2	2	0	0	Oxidation (M)	M7:Oxidation (M):1000.00	5 79 32 5 5 9 9 3 3	YYDGKVM(+15.99)KL	P11387|TOP1_HUMAN	DB Search	YYDGKVMKL	YYDGKVMKL
620	FLADNHHQV	32.11	1079.51	9	66.7	9	1.6	540.766	2	15.963	1.3455	0.86	792841	Neo_sh14_patient1_HLAI_0412_HM1114_tims_Slot1-36_1_3662.d	18049	0.8978	0.9075	-0.0226			1	1	0	0			5 24 18 9 6 6 0 0 0	FLADNHHQV	Q13315|ATM_HUMAN	DB Search	FLADNHHQV	FLADNHHQV
621	KLMGQIHQL	34.15	1066.6	9	55.6	9	4.1	534.307	2	23.3134	1.1813	0.83	1159635	Neo_sh14_patient1_HLAI_0412_HM1114_tims_Slot1-36_1_3662.d	28659	0.8807	0.8904	0.0044			1	1	0	0			5 51 65 0 0 11 53 0 0	KLMGQIHQL	Q8TBA6|GOGA5_HUMAN	DB Search	KLMGQIHQL	KLMGQIHQL
622	RVYGQPSTK	34.48	1034.55	9	33.3	9	6.4	518.286	2	7.1384	-0.1224	0.91	349013	Neo_sh14_patient1_HLAI_0412_HM1114_tims_Slot1-36_1_3662.d	3845	0.8288	0.8385	0.0364	789	13000	2	2	1	1			0 0 1 0 12 1 0 22 5	RVYGQPSTK	Q9BZR9|TRIM8_HUMAN	DB Search	RVYGQPSTK	RVYGQPSTK
623	QLIDKVWQL	18.1	1141.65	9	55.6	9	-1.3	571.831	2	53.9371	-2.0683	0.7	2661769	Neo_sh14_patient1_HLAI_0412_HM1114_tims_Slot1-36_1_3662.d	54649	0.88	0.8896	0.0452			1	1	0	0			0 0 48 15 8 8 15 0 0	QLIDKVWQL	Q92503|S14L1_HUMAN	DB Search	QLIDKVWQL	QLIDKVWQL
624	RIFEPPPPK	52.13	1079.61	9	44.4	9	5.4	540.817	2	19.6763	-0.5804	0.85	978224	Neo_sh14_patient1_HLAI_0412_HM1114_tims_Slot1-36_1_3662.d	23504	0.8466	0.8563	0.0385			6	6	0	0			1 1 1 5 55 14 5 0 0	RIFEPPPPK	O43143|DHX15_HUMAN	DB Search	RIFEPPPPK	RIFEPPPPK
625	FPHGGGFVL	24.85	929.476	9	44.4	9	-4	465.743	2	46.1776	0.6186	0.88	2279899	Neo_sh14_patient1_HLAI_0412_HM1114_tims_Slot1-36_1_3662.d	49159	0.7962	0.8059	0.0189			4	4	0	0			0 0 0 6 0 0 23 27 5	FPHGGGFVL	Q8IZL9|CDK20_HUMAN	DB Search	FPHGGGFVL
626	M(+15.99)PHDLITQL	16.24	1082.54	9	55.6	9	-1.5	542.278	2	39.9694	-2.9886	0.73	1973488	Neo_sh14_patient1_HLAI_0412_HM1114_tims_Slot1-36_1_3662.d	43852	0.8606	0.8703	0.0046			3	3	0	0	Oxidation (M)	M1:Oxidation (M):1000.00	0 0 6 6 34 82 2 0 0	M(+15.99)PHDLITQL	Q9BSJ2|GCP2_HUMAN	DB Search	MPHDLITQL	MPHDLITQL
627	HPNQEAHSL	42.67	1031.48	9	77.8	9	-1.3	516.746	2	6.937	-1.7336	0.88	339374	Neo_sh14_patient1_HLAI_0412_HM1114_tims_Slot1-36_1_3662.d	3386	0.8237	0.8334	0.0214	390	4790	1	1	1	1			5 24 9 6 6 26 8 0 0	HPNQEAHSL	Q8WTV0|SCRB1_HUMAN	DB Search	HPNQEAHSL	HPNQEAHSL
628	MPEYNAPAL	18.93	1004.46	9	77.8	9	-3	503.238	2	44.588	-0.8873	0.8	2201497	Neo_sh14_patient1_HLAI_0412_HM1114_tims_Slot1-36_1_3662.d	47869	0.8086	0.8183	0.0265			2	2	0	0			5 0 0 5 5 45 3 3 5	MPEYNAPAL	Q8IY63|AMOL1_HUMAN	DB Search	MPEYNAPAL
629	SVYSGIRHK	38.88	1045.57	9	55.6	9	4.3	523.793	2	8.3575	0.135	0.93	409803	Neo_sh14_patient1_HLAI_0412_HM1114_tims_Slot1-36_1_3662.d	5883	0.8582	0.8679	0.0169	3360	44700	2	2	1	1			1 1 75 24 3 0 0 2 2	SVYSGIRHK	Q14642|I5P1_HUMAN	DB Search	SVYSGIRHK	SVYSGIRHK
630	LAVDKSASL	28.54	902.507	9	77.8	9	0.6	452.261	2	23.6545	-4.1346	0.79	1176617	Neo_sh14_patient1_HLAI_0412_HM1114_tims_Slot1-36_1_3662.d	29117	0.7676	0.7773	0.0476			2	2	0	0			5 79 57 18 0 0 2 2 5	LAVDKSASL	Q96T58|MINT_HUMAN	DB Search	LAVDKSASL	LAVDKSASL
631	MPADYVNKL	41.33	1049.52	9	77.8	9	2.7	525.769	2	36.1581	-3.1331	0.76	1781899	Neo_sh14_patient1_HLAI_0412_HM1114_tims_Slot1-36_1_3662.d	39535	0.8423	0.852	0.0328	947	10600	1	1	1	1			5 88 45 9 9 5 5 0 0	MPADYVNKL	Q93034|CUL5_HUMAN	DB Search	MPADYVNKL	MPADYVNKL
632	ILYGKIIHL	35.33	1068.67	9	77.8	9	-0.4	535.342	2	44.294	-0.7197	0.81	2184710	Neo_sh14_patient1_HLAI_0412_HM1114_tims_Slot1-36_1_3662.d	47606	0.8916	0.9013	0.0336	529	7850	2	2	1	1			5 29 67 9 9 15 23 0 0	ILYGKIIHL	P0CG13|CTF8_HUMAN	DB Search	ILYGKIIHL	ILYGKIIHL
633	HPDKM(+15.99)HLVL	9.92	1104.58	9	33.3	9	5.8	553.298	2	16.6069	1.6698	0.57	824947	Neo_sh14_patient1_HLAI_0412_HM1114_tims_Slot1-36_1_3662.d	18943	0.8819	0.8916	0.0133			1	1	0	0	Oxidation (M)	M5:Oxidation (M):1000.00	5 0 0 0 0 6 6 0 0	HPDKM(+15.99)HLVL	Q8TCB7|METL6_HUMAN	DB Search	HPDKMHLVL
634	KIAKQIVQK	37.47	1054.69	9	100	9	2.3	528.352	2	6.6344	-1.2908	0.81	326079	Neo_sh14_patient1_HLAI_0412_HM1114_tims_Slot1-36_1_3662.d	2943	0.854	0.8637	0.0312			1	1	0	0			5 45 13 12 14 14 22 26 5	KIAKQIVQK	P60604|UB2G2_HUMAN	DB Search	KIAKQIVQK	KIAKQIVQK
635	FLM(+15.99)NEVIKL	39.36	1121.62	9	77.8	9	1.2	561.816	2	50.8711	2.8222	0.8	2507332	Neo_sh14_patient1_HLAI_0412_HM1114_tims_Slot1-36_1_3662.d	52600	0.8803	0.89	0.0348	84.2	969	1	1	1	1	Oxidation (M)	M3:Oxidation (M):1000.00	5 33 40 16 15 10 10 0 0	FLM(+15.99)NEVIKL	Q9BXL7|CAR11_HUMAN	DB Search	FLMNEVIKL	FLMNEVIKL
636	ATFPLSVQK	29.07	989.555	9	33.3	9	-1.1	495.784	2	35.31	2.6392	0.89	1738665	Neo_sh14_patient1_HLAI_0412_HM1114_tims_Slot1-36_1_3662.d	38529	0.8102	0.8199	0.035	423	6120	1	1	1	1			0 0 34 34 12 0 0 0 0	ATFPLSVQK	P26196|DDX6_HUMAN	DB Search	ATFPLSVQK	ATFPLSVQK
637	HPTDERVAL	40.54	1036.53	9	55.6	9	-3.9	519.27	2	16.9857	-0.554	0.83	840099	Neo_sh14_patient1_HLAI_0412_HM1114_tims_Slot1-36_1_3662.d	19407	0.8303	0.84	0.0448	18000	189000	4	4	1	1			5 35 17 17 3 0 0 0 1	HPTDERVAL	Q16719|KYNU_HUMAN	DB Search	HPTDERVAL	HPTDERVAL
638	RTLEPLAKK	41.83	1054.65	9	66.7	9	3	528.334	2	10.2367	-1.5956	0.87	506539	Neo_sh14_patient1_HLAI_0412_HM1114_tims_Slot1-36_1_3662.d	8983	0.8722	0.8819	0.013			5	5	0	0			0 0 1 8 11 11 51 47 5	RTLEPLAKK	A8MTT3|CEBOS_HUMAN	DB Search	RTLEPLAKK	RTLEPLAKK
639	GTYHGM(+15.99)TLK	30.43	1022.49	9	55.6	9	9.5	512.255	2	8.0004	-1.799	0.88	394597	Neo_sh14_patient1_HLAI_0412_HM1114_tims_Slot1-36_1_3662.d	5365	0.8497	0.8594	0.0154			1	1	0	0	Oxidation (M)	M6:Oxidation (M):1000.00	0 0 41 80 12 12 35 1 1	GTYHGM(+15.99)TLK	Q6P1J9|CDC73_HUMAN	DB Search	GTYHGMTLK	GTYHGMTLK
640	RVHPRPLVK	21.95	1100.69	9	22.2	9	3.7	367.906	3	6.4067	-1.0993	0.24	314694	Neo_sh14_patient1_HLAI_0412_HM1114_tims_Slot1-36_1_3662.d	2574	0.705	0.7146	0.0302			1	1	0	0			0 0 0 3 0 0 2 0 0	RVHPRPLVK	P98182|ZN200_HUMAN	DB Search	RVHPRPLVK	RVHPRPLVK
641	ALFSRIFGK	26.75	1037.6	9	55.6	9	-0.3	519.808	2	42.8092	4.5372	0.81	2113919	Neo_sh14_patient1_HLAI_0412_HM1114_tims_Slot1-36_1_3662.d	46583	0.8396	0.8493	0.0455			1	1	0	0			5 33 29 0 0 0 0 7 5	ALFSRIFGK	P84085|ARF5_HUMAN	DB Search	ALFSRIFGK	ALFSRIFGK
642	ALYGRFTIK	39.49	1067.61	9	88.9	9	7.1	534.817	2	29.8055	-2.4573	0.88	1472820	Neo_sh14_patient1_HLAI_0412_HM1114_tims_Slot1-36_1_3662.d	33396	0.8776	0.8873	0.0275			2	2	0	0			5 6 32 2 0 5 5 8 5	ALYGRFTIK	P07947|YES_HUMAN:P06241|FYN_HUMAN:P12931|SRC_HUMAN	DB Search	ALYGRFTIK	ALYGRFTIK
643	HPLHENEVL	25.31	1086.55	9	77.8	9	-0.8	544.28	2	17.8572	-0.4554	0.7	887482	Neo_sh14_patient1_HLAI_0412_HM1114_tims_Slot1-36_1_3662.d	20890	0.8567	0.8664	0.0285			1	1	0	0			5 0 0 8 8 23 82 11 5	HPLHENEVL	P54259|ATN1_HUMAN	DB Search	HPLHENEVL
644	RM(+15.99)GTPYLQK	32.42	1108.57	9	44.4	9	0.3	555.292	2	12.3619	0.4122	0.82	613016	Neo_sh14_patient1_HLAI_0412_HM1114_tims_Slot1-36_1_3662.d	12644	0.8513	0.861	0.0439			2	2	0	0	Oxidation (M)	M2:Oxidation (M):1000.00	2 0 0 0 0 0 63 11 5	RM(+15.99)GTPYLQK	Q05193|DYN1_HUMAN	DB Search	RMGTPYLQK	RMGTPYLQK
645	KLHDSVVMV	34.8	1026.55	9	55.6	9	-2.5	514.283	2	23.1465	-0.697	0.86	1150091	Neo_sh14_patient1_HLAI_0412_HM1114_tims_Slot1-36_1_3662.d	28295	0.8214	0.8311	0.0437	379	7910	1	1	1	1			0 0 0 1 9 9 61 2 2	KLHDSVVMV	Q9GZN8|CT027_HUMAN	DB Search	KLHDSVVMV	KLHDSVVMV
646	TLDEKIEKV	48.94	1073.6	9	77.8	9	-0.6	537.805	2	20.3058	1.234	0.84	1008454	Neo_sh14_patient1_HLAI_0412_HM1114_tims_Slot1-36_1_3662.d	24358	0.8575	0.8672	0.0377	1970	55400	2	2	1	1			5 6 18 5 5 7 3 1 1	TLDEKIEKV	Q96GQ7|DDX27_HUMAN	DB Search	TLDEKIEKV	TLDEKIEKV
647	KLVERLHMV	26.5	1123.65	9	66.7	9	3.4	562.836	2	22.1763	1.9516	0.75	1102827	Neo_sh14_patient1_HLAI_0412_HM1114_tims_Slot1-36_1_3662.d	26931	0.8792	0.8889	0.036			2	2	0	0			5 48 30 8 0 0 0 3 5	KLVERLHMV	O60264|SMCA5_HUMAN	DB Search	KLVERLHMV	KLVERLHMV
648	HPEKLATVL	38.17	1006.58	9	66.7	9	2.4	504.299	2	23.2838	0.3029	0.59	1157702	Neo_sh14_patient1_HLAI_0412_HM1114_tims_Slot1-36_1_3662.d	28562	0.8741	0.8838	-0.009	36700	321000	3	3	1	1			5 0 11 21 21 28 53 1 1	HPEKLATVL	Q9NV06|DCA13_HUMAN	DB Search	HPEKLATVL	HPEKLATVL
649	MPTSTILRL	30.37	1030.58	9	66.7	9	13.3	516.306	2	48.8645	0.0271	0.93	2412363	Neo_sh14_patient1_HLAI_0412_HM1114_tims_Slot1-36_1_3662.d	51267	0.8377	0.8474	0.0275			1	1	0	0			5 46 63 22 4 3 1 0 0	MPTSTILRL	Q7Z6Z7|HUWE1_HUMAN	DB Search	MPTSTILRL
650	KM(+15.99)MDVTVTI	21.25	1052.52	9	55.6	9	3.5	527.271	2	37.9996	1.2432	0.86	1875881	Neo_sh14_patient1_HLAI_0412_HM1114_tims_Slot1-36_1_3662.d	41717	0.8261	0.8358	0.0391			1	1	0	0	Oxidation (M)	M2:Oxidation (M):14.02	0 0 0 0 7 38 66 10 5	KM(+15.99)MDVTVTI	Q15155|NOMO1_HUMAN:P69849|NOMO3_HUMAN:Q5JPE7|NOMO2_HUMAN	DB Search	KMMDVTVTI	KMMDVTVTI
651	TLMERTVSL	30.36	1048.56	9	55.6	9	-0.2	525.287	2	37.6047	-0.6673	0.89	1851466	Neo_sh14_patient1_HLAI_0412_HM1114_tims_Slot1-36_1_3662.d	41170	0.8385	0.8482	0.0367	9270	71900	2	2	1	1			3 3 30 3 1 1 5 0 0	TLMERTVSL	Q8IWE2|NXP20_HUMAN	DB Search	TLMERTVSL	TLMERTVSL
652	FIKDGSSTY	27.43	1016.48	9	44.4	9	4	509.25	2	18.5773	0.1078	0.74	923411	Neo_sh14_patient1_HLAI_0412_HM1114_tims_Slot1-36_1_3662.d	21935	0.8125	0.8222	0.0326			1	1	0	0			5 23 0 0 0 5 13 0 0	FIKDGSSTY	Q5TEJ8|THMS2_HUMAN	DB Search	FIKDGSSTY	FIKDGSSTY
653	RLFPPLRQR	29.36	1181.71	9	77.8	9	1.1	394.913	3	21.7887	3.0986	0.74	1080208	Neo_sh14_patient1_HLAI_0412_HM1114_tims_Slot1-36_1_3662.d	26344	0.751	0.7606	-0.0058	29000	127000	9	9	2	2			5 20 18 18 3 6 2 0 0	RLFPPLRQR	Q8NBM4|UBAC2_HUMAN	DB Search	RLFPPLRQR	RLFPPLRQR
654	RLYQHAVEY	39.15	1177.59	9	66.7	9	1.7	589.802	2	18.418	-1.9661	0.7	912041	Neo_sh14_patient1_HLAI_0412_HM1114_tims_Slot1-36_1_3662.d	21581	0.8815	0.8912	0.0536	3350	35400	1	1	1	1			0 0 0 7 59 59 31 31 5	RLYQHAVEY	Q9UN37|VPS4A_HUMAN	DB Search	RLYQHAVEY	RLYQHAVEY
655	VILPTVHEV	32.72	1005.59	9	77.8	9	3.6	503.802	2	42.3172	1.7813	0.85	2089699	Neo_sh14_patient1_HLAI_0412_HM1114_tims_Slot1-36_1_3662.d	46231	0.8334	0.8431	0.0217			1	1	0	0			4 4 26 25 10 10 0 0 4	VILPTVHEV	Q8IWF6|DEN6A_HUMAN	DB Search	VILPTVHEV	VILPTVHEV
656	KLFTSTGLK	40.29	993.586	9	88.9	9	1.2	497.801	2	20.7749	0.5823	0.91	1033003	Neo_sh14_patient1_HLAI_0412_HM1114_tims_Slot1-36_1_3662.d	25039	0.8315	0.8412	0.0337			1	1	0	0			5 54 24 10 9 9 0 4 4	KLFTSTGLK	Q02952|AKA12_HUMAN	DB Search	KLFTSTGLK	KLFTSTGLK
657	LPQHPDVEM	46.26	1064.5	9	100	9	3.3	533.257	2	29.6541	-2.5575	0.73	1465364	Neo_sh14_patient1_HLAI_0412_HM1114_tims_Slot1-36_1_3662.d	33284	0.8319	0.8416	0.0233			4	4	0	0			5 9 9 16 3 3 82 10 5	LPQHPDVEM	Q7Z7E8|UB2Q1_HUMAN	DB Search	LPQHPDVEM	LPQHPDVEM
658	NFDDIKNGL	32.59	1034.5	9	44.4	9	8.5	518.263	2	36.2943	-3.8391	0.73	1791276	Neo_sh14_patient1_HLAI_0412_HM1114_tims_Slot1-36_1_3662.d	39732	0.8144	0.8241	0.0407			1	1	0	0			0 0 34 32 20 11 0 0 0	NFDDIKNGL	Q8NEB9|PK3C3_HUMAN	DB Search	NFDDIKNGL	NFDDIKNGL
659	GVYSFQFNK	23.24	1088.53	9	33.3	9	5.3	545.275	2	37.5072	0.0817	0.78	1851483	Neo_sh14_patient1_HLAI_0412_HM1114_tims_Slot1-36_1_3662.d	41187	0.861	0.8706	0.0242			1	1	0	0			0 0 41 36 3 0 0 0 0	GVYSFQFNK	Q15434|RBMS2_HUMAN	DB Search	GVYSFQFNK	GVYSFQFNK
660	KVIDHTPVEK	30.33	1164.65	10	60	10	1.6	583.333	2	10.7296	0.45	0.52	531251	Neo_sh14_patient1_HLAI_0412_HM1114_tims_Slot1-36_1_3662.d	9827	0.8916	0.9013	0.0336			1	1	0	0			5 18 9 2 0 0 0 1 3 3	KVIDHTPVEK	Q96T58|MINT_HUMAN	DB Search	KVIDHTPVEK	KVIDHTPVEK
661	KLTDTLVSK	48.09	1003.59	9	100	9	0.4	502.803	2	18.5394	-0.2775	0.82	921541	Neo_sh14_patient1_HLAI_0412_HM1114_tims_Slot1-36_1_3662.d	21901	0.8234	0.833	0.0418			1	1	0	0			5 29 17 17 3 6 17 11 5	KLTDTLVSK	Q86UP2|KTN1_HUMAN	DB Search	KLTDTLVSK	KLTDTLVSK
662	ALYKLGFFK	32.28	1085.63	9	66.7	9	-7.2	543.817	2	43.6038	-2.7455	0.89	2152985	Neo_sh14_patient1_HLAI_0412_HM1114_tims_Slot1-36_1_3662.d	47093	0.8807	0.8904	0.0344			1	1	0	0			0 0 78 78 36 8 7 0 4	ALYKLGFFK	P11215|ITAM_HUMAN	DB Search	ALYKLGFFK	ALYKLGFFK
663	SLLDDLHSA	25.02	969.477	9	44.4	9	-3.9	485.744	2	43.3767	-0.0308	0.77	2141804	Neo_sh14_patient1_HLAI_0412_HM1114_tims_Slot1-36_1_3662.d	46928	0.809	0.8187	0.0161			1	1	0	0			0 0 91 9 7 7 0 0 0	SLLDDLHSA	Q9C0D3|ZY11B_HUMAN	DB Search	SLLDDLHSA	SLLDDLHSA
664	GLQEHSISV	24.99	968.493	9	55.6	9	0.9	485.254	2	24.3744	-2.3818	0.69	1212582	Neo_sh14_patient1_HLAI_0412_HM1114_tims_Slot1-36_1_3662.d	30198	0.8168	0.8265	0.0184			1	1	0	0			0 0 10 10 1 0 68 63 5	GLQEHSISV	Q86TI0|TBCD1_HUMAN	DB Search	GLQEHSISV	GLQEHSISV
665	HADHSSLTL	34.82	979.472	9	77.8	9	3.7	490.745	2	17.0621	2.6032	0.82	843882	Neo_sh14_patient1_HLAI_0412_HM1114_tims_Slot1-36_1_3662.d	19518	0.8164	0.8261	0.0188	3870	53500	3	3	1	1			3 0 1 9 11 11 53 3 3	HADHSSLTL	Q7Z6Z7|HUWE1_HUMAN	DB Search	HADHSSLTL	HADHSSLTL
666	TVADKIHSV	42.54	968.529	9	100	9	2.4	485.273	2	16.9857	3.5178	0.94	843893	Neo_sh14_patient1_HLAI_0412_HM1114_tims_Slot1-36_1_3662.d	19529	0.8292	0.8389	0.006			1	1	0	0			5 7 28 10 6 6 5 2 2	TVADKIHSV	O95147|DUS14_HUMAN	DB Search	TVADKIHSV	TVADKIHSV
667	HATESEHSL	40.06	1009.45	9	77.8	9	4	505.733	2	0.6156	-6.9888	0.77	31391	Neo_sh14_patient1_HLAI_0412_HM1114_tims_Slot1-36_1_3662.d	179	0.816	0.8257	0.0192			6	6	0	0			5 46 12 12 13 13 25 0 0	HATESEHSL	Q13506|NAB1_HUMAN	DB Search	HATESEHSL	HATESEHSL
668	IPTHHINAL	26.42	1014.56	9	100	9	-7.8	508.284	2	19.7194	-1.0392	0.77	978212	Neo_sh14_patient1_HLAI_0412_HM1114_tims_Slot1-36_1_3662.d	23492	0.8257	0.8354	0.0195	229	4200	1	1	1	1			5 20 20 25 16 17 3 3 5	IPTHHINAL	O76024|WFS1_HUMAN	DB Search	IPTHHINAL
669	VPDHVVWSL	28.71	1050.55	9	55.6	9	-2.1	526.281	2	49.8146	-1.4162	0.8	2460803	Neo_sh14_patient1_HLAI_0412_HM1114_tims_Slot1-36_1_3662.d	51971	0.8423	0.852	0.0228	9600	58800	3	3	1	1			1 1 0 0 81 88 30 12 5	VPDHVVWSL	Q01628|IFM3_HUMAN:P13164|IFM1_HUMAN:Q01629|IFM2_HUMAN	DB Search	VPDHVVWSL	VPDHVVWSL
670	FVM(+15.99)ETFVHL	31.65	1137.55	9	55.6	9	4	569.786	2	50.8329	1.4605	0.75	2509194	Neo_sh14_patient1_HLAI_0412_HM1114_tims_Slot1-36_1_3662.d	52626	0.88	0.8896	0.0252			1	1	0	0	Oxidation (M)	M3:Oxidation (M):1000.00	0 0 31 31 26 24 7 0 0	FVM(+15.99)ETFVHL	Q9BVK8|TM147_HUMAN	DB Search	FVMETFVHL	FVMETFVHL
671	VLNNVVIHL	13.69	1019.61	9	33.3	9	-5	510.811	2	50.2274	1.926	0.62	2479412	Neo_sh14_patient1_HLAI_0412_HM1114_tims_Slot1-36_1_3662.d	52220	0.847	0.8567	0.0182			1	1	0	0			5 17 12 0 0 0 0 0 0	VLNNVVIHL	P42858|HD_HUMAN	DB Search	VLNNVVIHL	VLNNVVIHL
672	ALKVPTTEK	45.3	985.581	9	66.7	9	-1.7	493.797	2	15.3214	-0.6562	0.92	756934	Neo_sh14_patient1_HLAI_0412_HM1114_tims_Slot1-36_1_3662.d	17026	0.8544	0.8641	0.0008	1670	17600	1	1	1	1			2 2 29 43 6 5 1 0 0	ALKVPTTEK	Q04637|IF4G1_HUMAN	DB Search	ALKVPTTEK	ALKVPTTEK
673	KSVDPTLAL	23.72	942.539	9	44.4	9	5.1	472.279	2	37.0902	-1.7143	0.83	1830790	Neo_sh14_patient1_HLAI_0412_HM1114_tims_Slot1-36_1_3662.d	40690	0.8028	0.8125	0.0223			1	1	0	0			0 0 0 5 0 0 99 30 5	KSVDPTLAL	Q00610|CLH1_HUMAN	DB Search	KSVDPTLAL	KSVDPTLAL
674	RVYVGSIYY	38.11	1118.58	9	44.4	9	-1.3	560.295	2	38.8934	-1.4632	0.92	1919077	Neo_sh14_patient1_HLAI_0412_HM1114_tims_Slot1-36_1_3662.d	42685	0.8703	0.88	0.0349	262	3300	1	1	1	1			0 0 0 0 0 7 56 14 5	RVYVGSIYY	Q9UHX1|PUF60_HUMAN	DB Search	RVYVGSIYY	RVYVGSIYY
675	KTSSAFVGK	43.91	923.508	9	100	9	-0.6	462.761	2	4.9296	-4.0663	0.82	241868	Neo_sh14_patient1_HLAI_0412_HM1114_tims_Slot1-36_1_3662.d	1352	0.7885	0.7982	0.0267			5	5	0	0			5 90 31 4 4 5 15 15 5	KTSSAFVGK	Q99460|PSMD1_HUMAN	DB Search	KTSSAFVGK	KTSSAFVGK
676	QPGSTVHVL	23.48	936.503	9	55.6	9	1.9	469.26	2	23.2754	-0.9874	0.79	1157717	Neo_sh14_patient1_HLAI_0412_HM1114_tims_Slot1-36_1_3662.d	28577	0.811	0.8206	0.0142			1	1	0	0			5 15 4 4 0 0 0 0 4	QPGSTVHVL	Q96S82|UBL7_HUMAN	DB Search	QPGSTVHVL
677	RIYVYVKRK	24.28	1223.75	9	55.6	9	2	408.925	3	10.6159	-2.2122	0.69	525567	Neo_sh14_patient1_HLAI_0412_HM1114_tims_Slot1-36_1_3662.d	9651	0.7568	0.7664	-0.0016			1	1	0	0			0 0 25 37 21 30 14 0 0	RIYVYVKRK	Q9UBY5|LPAR3_HUMAN	DB Search	RIYVYVKRK	RIYVYVKRK
678	KVRESHFLQK	43.96	1270.71	10	70	10	-5.2	424.577	3	8.19	0.2895	0.53	404105	Neo_sh14_patient1_HLAI_0412_HM1114_tims_Slot1-36_1_3662.d	5693	0.6911	0.7007	0.0541			2	2	0	0			5 0 0 0 5 5 22 8 8 5	KVRESHFLQK	O15037|KHNYN_HUMAN	DB Search	KVRESHFLQK	KVRESHFLQK
679	ALDHMVEYV	34.58	1075.5	9	55.6	9	4.8	538.76	2	40.8406	-1.3064	0.75	2016645	Neo_sh14_patient1_HLAI_0412_HM1114_tims_Slot1-36_1_3662.d	44781	0.861	0.8706	0.0242			2	2	0	0			0 0 0 0 21 32 92 7 5	ALDHMVEYV	O60664|PLIN3_HUMAN	DB Search	ALDHMVEYV	ALDHMVEYV
680	GLYEFFRAK	53.67	1129.59	9	44.4	9	1.2	565.804	2	40.5969	1.4383	0.89	2003501	Neo_sh14_patient1_HLAI_0412_HM1114_tims_Slot1-36_1_3662.d	44489	0.9025	0.9122	0.0227	2670	30200	2	2	1	1			1 1 93 93 17 6 1 0 0	GLYEFFRAK	Q8IWX8|CHERP_HUMAN	DB Search	GLYEFFRAK	GLYEFFRAK
681	YLHEHKIVY	45.99	1200.63	9	55.6	9	0.1	601.322	2	16.7585	-0.1728	0.77	832526	Neo_sh14_patient1_HLAI_0412_HM1114_tims_Slot1-36_1_3662.d	19178	0.9234	0.9331	0.0217			1	1	0	0			0 0 19 29 29 60 29 0 0	YLHEHKIVY	Q16513|PKN2_HUMAN	DB Search	YLHEHKIVY	YLHEHKIVY
682	RVAAHPILR	41.77	1031.64	9	55.6	9	0.9	344.886	3	11.223	0.17	0.83	556015	Neo_sh14_patient1_HLAI_0412_HM1114_tims_Slot1-36_1_3662.d	10723	0.7266	0.7363	0.0086			1	1	0	0			0 0 3 8 26 32 12 0 0	RVAAHPILR	Q9UNH7|SNX6_HUMAN	DB Search	RVAAHPILR	RVAAHPILR
683	HPNDDDVHF	44.8	1094.44	9	55.6	9	3	548.23	2	17.4783	-11.4095	0.59	868525	Neo_sh14_patient1_HLAI_0412_HM1114_tims_Slot1-36_1_3662.d	20293	0.8796	0.8893	-0.0144			1	1	0	0			5 27 37 0 0 10 33 0 0	HPNDDDVHF	Q8IZH2|XRN1_HUMAN	DB Search	HPNDDDVHF	HPNDDDVHF
684	AQNEPLTQK	40.49	1027.53	9	66.7	9	-0.5	514.772	2	9.8302	-2.2661	0.9	485649	Neo_sh14_patient1_HLAI_0412_HM1114_tims_Slot1-36_1_3662.d	8289	0.823	0.8327	0.0222	421	7340	1	1	1	1			5 5 13 13 8 8 0 0 0	AQNEPLTQK	O95104|SCAF4_HUMAN	DB Search	AQNEPLTQK	AQNEPLTQK
685	TPGNFFHVL	25.88	1030.52	9	44.4	9	-5	516.266	2	52.6115	-1.0173	0.52	2596456	Neo_sh14_patient1_HLAI_0412_HM1114_tims_Slot1-36_1_3662.d	53596	0.8416	0.8513	0.0036			1	1	0	0			5 37 31 13 0 0 0 0 0	TPGNFFHVL	Q02218|ODO1_HUMAN	DB Search	TPGNFFHVL
686	RVAGISLAY	26.74	948.539	9	44.4	9	-3.1	475.275	2	38.6438	0.7724	0.82	1907818	Neo_sh14_patient1_HLAI_0412_HM1114_tims_Slot1-36_1_3662.d	42442	0.8102	0.8199	0.025			1	1	0	0			0 0 0 0 0 14 56 36 5	RVAGISLAY	Q9NX46|ADPRS_HUMAN	DB Search	RVAGISLAY	RVAGISLAY
687	IVYEKIM(+15.99)EH	29.23	1176.58	9	100	9	0.7	589.3	2	18.7514	-0.2246	0.74	932864	Neo_sh14_patient1_HLAI_0412_HM1114_tims_Slot1-36_1_3662.d	22208	0.8986	0.9083	0.0466	199	2040	1	1	1	1	Oxidation (M)	M7:Oxidation (M):1000.00	5 6 17 17 11 11 4 3 5	IVYEKIM(+15.99)EH	O75643|U520_HUMAN	DB Search	IVYEKIMEH	IVYEKIMEH
688	HAVTVVNIL	32.46	964.571	9	55.6	9	-1.2	483.292	2	47.8047	2.162	0.77	2360138	Neo_sh14_patient1_HLAI_0412_HM1114_tims_Slot1-36_1_3662.d	50450	0.8044	0.8141	0.0408			1	1	0	0			0 0 14 16 22 98 71 0 0	HAVTVVNIL	Q9H2Y7|ZN106_HUMAN	DB Search	HAVTVVNIL	HAVTVVNIL
689	YSVYVYKVL	29.49	1132.62	9	66.7	9	4.8	567.318	2	49.5459	1.643	0.84	2445877	Neo_sh14_patient1_HLAI_0412_HM1114_tims_Slot1-36_1_3662.d	51733	0.8761	0.8858	0.0491			1	1	0	0			5 17 17 38 38 28 0 0 0	YSVYVYKVL	P62807|H2B1C_HUMAN:Q93079|H2B1H_HUMAN:P57053|H2BFS_HUMAN:Q99879|H2B1M_HUMAN:P58876|H2B1D_HUMAN:O60814|H2B1K_HUMAN:Q99877|H2B1N_HUMAN:Q5QNW6|H2B2F_HUMAN:Q99880|H2B1L_HUMAN	DB Search	YSVYVYKVL	YSVYVYKVL
690	VLKEEGVSF	28.57	1006.53	9	55.6	9	3	504.276	2	32.9093	-0.4138	0.47	1626084	Neo_sh14_patient1_HLAI_0412_HM1114_tims_Slot1-36_1_3662.d	36108	0.8466	0.8563	-0.0015			4	4	0	0			0 0 0 0 13 36 94 8 5	VLKEEGVSF	P78527|PRKDC_HUMAN	DB Search	VLKEEGVSF	VLKEEGVSF
691	RIHFPLATY	38.23	1116.61	9	22.2	9	-3	559.31	2	41.472	0.4861	0.88	2044743	Neo_sh14_patient1_HLAI_0412_HM1114_tims_Slot1-36_1_3662.d	45339	0.8687	0.8784	0.0364	242	2730	1	1	1	1			0 0 0 14 0 0 38 0 0	RIHFPLATY	Q6PEY2|TBA3E_HUMAN:Q71U36|TBA1A_HUMAN:P68363|TBA1B_HUMAN:P0DPH8|TBA3D_HUMAN:Q9BQE3|TBA1C_HUMAN:P68366|TBA4A_HUMAN:P0DPH7|TBA3C_HUMAN	DB Search	RIHFPLATY	RIHFPLATY
692	ALAGHQLIR	36.56	977.577	9	77.8	9	-3	489.794	2	17.4025	2.154	0.89	864748	Neo_sh14_patient1_HLAI_0412_HM1114_tims_Slot1-36_1_3662.d	20188	0.8559	0.8656	0.0092			2	2	0	0			5 6 45 15 15 5 1 0 3	ALAGHQLIR	P78527|PRKDC_HUMAN	DB Search	ALAGHQLIR	ALAGHQLIR
693	IPDEQIVVM	31.59	1042.54	9	66.7	9	4.9	522.278	2	52.4008	-0.1758	0.75	2581583	Neo_sh14_patient1_HLAI_0412_HM1114_tims_Slot1-36_1_3662.d	53411	0.8261	0.8358	0.0191	740	7560	3	3	1	1			0 0 0 2 4 71 27 5 5	IPDEQIVVM	Q99538|LGMN_HUMAN	DB Search	IPDEQIVVM	IPDEQIVVM
694	M(+15.99)PAETIKEL	18.11	1046.53	9	44.4	9	5.5	524.276	2	24.4123	-3.1809	0.43	1214461	Neo_sh14_patient1_HLAI_0412_HM1114_tims_Slot1-36_1_3662.d	30241	0.823	0.8327	0.0422	347	4760	2	2	1	1	Oxidation (M)	M1:Oxidation (M):1000.00	5 8 8 0 0 20 0 0 0	M(+15.99)PAETIKEL	Q9H694|BICC1_HUMAN	DB Search	MPAETIKEL	MPAETIKEL
695	TFDVAPSRL	45.69	1004.53	9	55.6	9	1.8	503.273	2	38.2095	-3.4459	0.93	1885268	Neo_sh14_patient1_HLAI_0412_HM1114_tims_Slot1-36_1_3662.d	41924	0.8214	0.8311	0.0237	2650	33300	2	2	1	1			5 10 40 39 32 0 0 0 0	TFDVAPSRL	Q15155|NOMO1_HUMAN:P69849|NOMO3_HUMAN:Q5JPE7|NOMO2_HUMAN	DB Search	TFDVAPSRL	TFDVAPSRL
696	KVFGGTVHK	48.76	971.555	9	77.8	9	2.8	486.786	2	6.8784	-1.5928	0.92	335575	Neo_sh14_patient1_HLAI_0412_HM1114_tims_Slot1-36_1_3662.d	3259	0.8094	0.8191	0.0357	39600	440000	5	5	1	1			5 45 22 5 1 1 3 8 5	KVFGGTVHK	P49915|GUAA_HUMAN	DB Search	KVFGGTVHK	KVFGGTVHK
697	FPSGSVHSF	29.34	963.445	9	77.8	9	5.4	482.732	2	29.8433	0.1727	0.77	1474679	Neo_sh14_patient1_HLAI_0412_HM1114_tims_Slot1-36_1_3662.d	33419	0.8098	0.8195	0.0054			4	4	0	0			5 67 65 4 4 13 6 0 0	FPSGSVHSF	Q8TBM8|DJB14_HUMAN	DB Search	FPSGSVHSF	FPSGSVHSF
698	LPLQTSHAL	35.9	978.55	9	66.7	9	-1.7	490.281	2	32.6441	-2.6318	0.81	1612967	Neo_sh14_patient1_HLAI_0412_HM1114_tims_Slot1-36_1_3662.d	35843	0.8513	0.861	-0.0161			2	2	0	0			5 11 75 31 15 0 3 0 0	LPLQTSHAL	O95936|EOMES_HUMAN	DB Search	LPLQTSHAL	LPLQTSHAL
699	QYDEAVAQF	26.85	1069.47	9	33.3	9	-1.6	535.742	2	39.3255	-4.3945	0.76	1941595	Neo_sh14_patient1_HLAI_0412_HM1114_tims_Slot1-36_1_3662.d	43171	0.8272	0.8369	0.0379	6800	66700	3	3	1	1			0 0 8 0 0 71 31 0 0	QYDEAVAQF	P49321|NASP_HUMAN	DB Search	QYDEAVAQF	QYDEAVAQF
700	FPAYERVVL	33.01	1092.6	9	44.4	9	0.4	547.306	2	47.3128	-0.4423	0.9	2335923	Neo_sh14_patient1_HLAI_0412_HM1114_tims_Slot1-36_1_3662.d	50103	0.8536	0.8633	0.0416			1	1	0	0			5 49 61 10 1 0 1 1 1	FPAYERVVL	Q07157|ZO1_HUMAN	DB Search	FPAYERVVL	FPAYERVVL
701	FFDAELSQM(+15.99)	23.3	1102.46	9	55.6	9	5	552.242	2	43.9445	-4.5716	0.68	2169783	Neo_sh14_patient1_HLAI_0412_HM1114_tims_Slot1-36_1_3662.d	47367	0.859	0.8687	-0.0039			5	5	0	0	Oxidation (M)	M9:Oxidation (M):1000.00	0 0 67 72 72 13 13 0 0	FFDAELSQM(+15.99)	P13647|K2C5_HUMAN	DB Search	FFDAELSQM
702	KLFSEKLLK	26.51	1104.69	9	77.8	9	-2.4	553.351	2	23.806	2.379	0.76	1184146	Neo_sh14_patient1_HLAI_0412_HM1114_tims_Slot1-36_1_3662.d	29302	0.8815	0.8912	0.0336			1	1	0	0			5 40 30 3 3 1 1 9 5	KLFSEKLLK	Q15067|ACOX1_HUMAN	DB Search	KLFSEKLLK	KLFSEKLLK
703	LPHGSSYSL	18.96	959.471	9	66.7	9	8.6	480.747	2	24.4706	0.6708	0.61	1216426	Neo_sh14_patient1_HLAI_0412_HM1114_tims_Slot1-36_1_3662.d	30370	0.8005	0.8102	0.0247	752	21500	3	3	1	1			5 5 5 0 0 0 24 74 5	LPHGSSYSL	Q9NZM3|ITSN2_HUMAN	DB Search	LPHGSSYSL	LPHGSSYSL
704	LPVEHVNQL	21.98	1047.57	9	88.9	9	-8.7	524.788	2	32.4926	-3.0106	0.67	1605476	Neo_sh14_patient1_HLAI_0412_HM1114_tims_Slot1-36_1_3662.d	35696	0.8396	0.8493	0.0255			2	2	0	0			5 20 11 11 0 16 13 4 4	LPVEHVNQL	Q8IYH5|ZZZ3_HUMAN	DB Search	LPVEHVNQL	LPVEHVNQL
705	RILGPGLNK	32.78	966.597	9	77.8	9	-2.1	484.305	2	17.6604	-0.4027	0.92	876100	Neo_sh14_patient1_HLAI_0412_HM1114_tims_Slot1-36_1_3662.d	20524	0.8055	0.8152	0.0496	445	7530	1	1	1	1			1 1 5 9 2 2 71 26 5	RILGPGLNK	P62906|RL10A_HUMAN	DB Search	RILGPGLNK	RILGPGLNK
706	VLMDRLPSL	34.47	1042.58	9	66.7	9	8.9	522.304	2	52.4601	1.5505	0.87	2589005	Neo_sh14_patient1_HLAI_0412_HM1114_tims_Slot1-36_1_3662.d	53489	0.8582	0.8679	0.0169			2	2	0	0			5 22 22 4 0 5 0 0 2	VLMDRLPSL	O60287|NPA1P_HUMAN	DB Search	VLMDRLPSL	VLMDRLPSL
707	LPVKQDHSL	27.17	1035.57	9	55.6	9	0.9	518.793	2	16.569	-1.2156	0.49	823067	Neo_sh14_patient1_HLAI_0412_HM1114_tims_Slot1-36_1_3662.d	18899	0.8365	0.8462	0.0286			1	1	0	0			5 26 26 7 7 0 0 0 0	LPVKQDHSL	Q6RI45|BRWD3_HUMAN	DB Search	LPVKQDHSL	LPVKQDHSL
708	FPHLVHAEL	46.81	1061.57	9	77.8	9	6.4	531.794	2	38.0004	3.2781	0.59	1875880	Neo_sh14_patient1_HLAI_0412_HM1114_tims_Slot1-36_1_3662.d	41716	0.8443	0.854	0.0309	1140	12500	3	3	1	1			5 30 20 9 9 12 0 0 5	FPHLVHAEL	Q8IXI1|MIRO2_HUMAN	DB Search	FPHLVHAEL	FPHLVHAEL
709	VPDEHFSTL	25.78	1043.49	9	66.7	9	-5.7	522.75	2	33.5155	0.1428	0.49	1656098	Neo_sh14_patient1_HLAI_0412_HM1114_tims_Slot1-36_1_3662.d	36746	0.8478	0.8575	-0.0026			1	1	0	0			5 18 18 0 12 11 11 0 0	VPDEHFSTL	Q9BRJ6|CG050_HUMAN	DB Search	VPDEHFSTL	VPDEHFSTL
710	KTYQEVAQK	53.18	1093.58	9	100	9	7.5	547.8	2	6.9381	-1.9576	0.69	341337	Neo_sh14_patient1_HLAI_0412_HM1114_tims_Slot1-36_1_3662.d	3513	0.8571	0.8668	0.0281	535	9130	2	2	1	1			5 75 31 31 27 47 24 24 5	KTYQEVAQK	Q9NZK5|ADA2_HUMAN	DB Search	KTYQEVAQK	KTYQEVAQK
711	MPSSAVRVL	35.02	958.527	9	66.7	9	4	480.273	2	33.9444	2.949	0.74	1674859	Neo_sh14_patient1_HLAI_0412_HM1114_tims_Slot1-36_1_3662.d	37147	0.7908	0.8005	0.0343			1	1	0	0			5 87 33 8 4 4 0 0 0	MPSSAVRVL	Q8N0X2|SPG16_HUMAN	DB Search	MPSSAVRVL	MPSSAVRVL
712	RLFEGIIKGK	52.13	1159.71	10	60	10	-5.1	387.575	3	24.5262	2.2213	0.89	1220243	Neo_sh14_patient1_HLAI_0412_HM1114_tims_Slot1-36_1_3662.d	30515	0.7088	0.7185	0.0163			4	4	0	0			0 0 5 34 34 28 21 2 0 0	RLFEGIIKGK	O14936|CSKP_HUMAN	DB Search	RLFEGIIKGK	RLFEGIIKGK
713	LPFHTSTEM	28.19	1061.49	9	88.9	9	1.3	531.751	2	33.8686	-1.4984	0.58	1671110	Neo_sh14_patient1_HLAI_0412_HM1114_tims_Slot1-36_1_3662.d	37070	0.8299	0.8396	0.0252			1	1	0	0			5 2 2 0 8 8 8 8 5	LPFHTSTEM	O75911|DHRS3_HUMAN	DB Search	LPFHTSTEM	LPFHTSTEM
714	IPSPVLVKL	28.73	964.632	9	100	9	-8.1	483.319	2	52.9142	2.899	0.78	2611308	Neo_sh14_patient1_HLAI_0412_HM1114_tims_Slot1-36_1_3662.d	53760	0.8071	0.8168	0.0381			1	1	0	0			5 78 78 15 11 7 5 2 2	IPSPVLVKL	P42356|PI4KA_HUMAN	DB Search	IPSPVLVKL	IPSPVLVKL
715	RVFQEVAQK	30.51	1103.61	9	66.7	9	4.8	552.814	2	13.3107	-1.8145	0.89	660425	Neo_sh14_patient1_HLAI_0412_HM1114_tims_Slot1-36_1_3662.d	14153	0.8606	0.8703	0.0346			1	1	0	0			0 0 0 6 11 32 32 20 5	RVFQEVAQK	Q99490|AGAP2_HUMAN	DB Search	RVFQEVAQK	RVFQEVAQK
716	EPHDISVAL	23.89	979.497	9	66.7	9	-0.1	490.756	2	37.2417	-2.9808	0.87	1838305	Neo_sh14_patient1_HLAI_0412_HM1114_tims_Slot1-36_1_3662.d	40861	0.816	0.8257	0.0192			1	1	0	0			0 0 0 22 24 38 43 33 5	EPHDISVAL	Q69YN4|VIR_HUMAN	DB Search	EPHDISVAL	EPHDISVAL
717	KISDFGLSK	39.76	993.549	9	77.8	9	3.6	497.784	2	22.8698	-0.3901	0.9	1136861	Neo_sh14_patient1_HLAI_0412_HM1114_tims_Slot1-36_1_3662.d	27917	0.8191	0.8288	0.0361	265	3450	1	1	1	1			5 62 4 4 4 4 8 0 0	KISDFGLSK	P43405|KSYK_HUMAN:Q8NFD2|ANKK1_HUMAN:P43403|ZAP70_HUMAN	DB Search	KISDFGLSK	KISDFGLSK
718	HLAEVLERV	34.51	1064.6	9	77.8	9	-10.7	533.3	2	34.4106	7.0119	0.9	1697382	Neo_sh14_patient1_HLAI_0412_HM1114_tims_Slot1-36_1_3662.d	37638	0.8606	0.8703	0.0446	833	15100	3	3	1	1			5 63 11 11 6 6 4 0 0	HLAEVLERV	Q5VTR2|BRE1A_HUMAN	DB Search	HLAEVLERV	HLAEVLERV
719	RLSSPGQLK	30.94	984.572	9	77.8	9	1.3	493.294	2	12.248	-0.0239	0.83	607330	Neo_sh14_patient1_HLAI_0412_HM1114_tims_Slot1-36_1_3662.d	12466	0.8358	0.8454	0.0194			1	1	0	0			0 0 4 4 5 3 41 5 5	RLSSPGQLK	Q9UMQ3|BARX2_HUMAN	DB Search	RLSSPGQLK
720	KLTRPLVM(+15.99)K	11.84	1100.67	9	55.6	9	-3.9	551.342	2	10.9194	1.2455	0.76	540788	Neo_sh14_patient1_HLAI_0412_HM1114_tims_Slot1-36_1_3662.d	10184	0.88	0.8896	0.0252			1	1	0	0	Oxidation (M)	M8:Oxidation (M):1000.00	5 21 0 0 0 0 4 12 5	KLTRPLVM(+15.99)K	O75131|CPNE3_HUMAN	DB Search	KLTRPLVMK	KLTRPLVMK
721	KTLPQMFTK	28.4	1092.6	9	66.7	9	-2.2	547.306	2	20.1281	-3.309	0.09	999034	Neo_sh14_patient1_HLAI_0412_HM1114_tims_Slot1-36_1_3662.d	24118	0.8532	0.8629	0.042	566	10600	2	2	1	1			5 2 2 1 1 0 35 22 5	KTLPQMFTK	O95486|SC24A_HUMAN	DB Search	KTLPQMFTK	KTLPQMFTK
722	HPISSEELL	31.34	1023.52	9	55.6	9	4.2	512.771	2	33.4815	-1.8855	0.85	1648598	Neo_sh14_patient1_HLAI_0412_HM1114_tims_Slot1-36_1_3662.d	36590	0.8094	0.8191	0.0557	4260	29200	2	2	1	1			0 0 3 1 1 7 31 26 5	HPISSEELL	P14921|ETS1_HUMAN	DB Search	HPISSEELL	HPISSEELL
723	KLGDSPIQK	44.01	984.56	9	100	9	2.2	493.289	2	13.5761	-1.1374	0.8	673687	Neo_sh14_patient1_HLAI_0412_HM1114_tims_Slot1-36_1_3662.d	14563	0.8451	0.8547	0.0001			1	1	0	0			5 95 17 17 5 24 24 13 5	KLGDSPIQK	Q13490|BIRC2_HUMAN	DB Search	KLGDSPIQK	KLGDSPIQK
724	RMYLTPSEK	40.28	1123.57	9	55.6	9	7.6	562.796	2	16.7824	-0.2099	0.83	830642	Neo_sh14_patient1_HLAI_0412_HM1114_tims_Slot1-36_1_3662.d	19130	0.8695	0.8792	0.0357	713	7930	1	1	1	1			1 1 1 4 4 3 1 18 5	RMYLTPSEK	Q7L576|CYFP1_HUMAN	DB Search	RMYLTPSEK	RMYLTPSEK
725	STYFKKLFK	21.47	1160.66	9	44.4	9	5.4	581.34	2	24.0714	0.8448	0.65	1197466	Neo_sh14_patient1_HLAI_0412_HM1114_tims_Slot1-36_1_3662.d	29770	0.9122	0.9219	0.033			1	1	0	0			0 0 85 20 20 44 0 0 0	STYFKKLFK	O43829|ZBT14_HUMAN	DB Search	STYFKKLFK	STYFKKLFK
726	HPSDSSAKL	44.5	940.461	9	66.7	9	2.2	471.239	2	6.7483	-4.2795	0.83	331797	Neo_sh14_patient1_HLAI_0412_HM1114_tims_Slot1-36_1_3662.d	3153	0.7842	0.7939	0.0509			1	1	0	0			5 37 6 0 3 3 25 0 0	HPSDSSAKL	Q9UBB9|TFP11_HUMAN	DB Search	HPSDSSAKL	HPSDSSAKL
727	MAVEGDHSM	26.22	975.379	9	66.7	9	7.5	488.7	2	16.7963	-2.5315	0.8	834410	Neo_sh14_patient1_HLAI_0412_HM1114_tims_Slot1-36_1_3662.d	19226	0.7901	0.7997	0.0251			1	1	0	0			5 83 64 44 0 0 0 5 5	MAVEGDHSM	Q6ZNJ1|NBEL2_HUMAN	DB Search	MAVEGDHSM	MAVEGDHSM
728	HPQFVTDVM	34.36	1072.5	9	55.6	9	-5.8	537.255	2	38.9847	-3.9733	0.84	1924703	Neo_sh14_patient1_HLAI_0412_HM1114_tims_Slot1-36_1_3662.d	42803	0.8268	0.8365	0.0383			1	1	0	0			0 0 3 3 13 0 0 22 5	HPQFVTDVM	P61221|ABCE1_HUMAN	DB Search	HPQFVTDVM	HPQFVTDVM
729	SVSSPVKSK	24.79	917.518	9	55.6	9	4.2	459.768	2	5.6488	-2.7726	0.87	277233	Neo_sh14_patient1_HLAI_0412_HM1114_tims_Slot1-36_1_3662.d	1833	0.8102	0.8199	-0.005			6	6	0	0			0 0 16 16 7 4 4 0 0	SVSSPVKSK	Q8IWI9|MGAP_HUMAN	DB Search	SVSSPVKSK	SVSSPVKSK
730	RLFIGGIPK	24.81	999.623	9	22.2	9	0.9	500.819	2	35.1591	-0.1168	0.94	1731172	Neo_sh14_patient1_HLAI_0412_HM1114_tims_Slot1-36_1_3662.d	38380	0.8532	0.8629	0.022	496	3960	1	1	1	1			1 0 0 2 1 1 31 0 0	RLFIGGIPK	A0AV96|RBM47_HUMAN	DB Search	RLFIGGIPK	RLFIGGIPK
731	VPVGHLVVL	17.44	931.585	9	55.6	9	2.1	466.801	2	48.6752	3.158	0.66	2403056	Neo_sh14_patient1_HLAI_0412_HM1114_tims_Slot1-36_1_3662.d	51140	0.8032	0.8129	0.0219			2	2	0	0			5 0 0 0 0 28 50 27 5	VPVGHLVVL	O76024|WFS1_HUMAN	DB Search	VPVGHLVVL	VPVGHLVVL
732	YLNTRLFTV	29.68	1125.62	9	66.7	9	0.4	563.817	2	50.568	2.5554	0.79	2496190	Neo_sh14_patient1_HLAI_0412_HM1114_tims_Slot1-36_1_3662.d	52474	0.8695	0.8792	0.0457			1	1	0	0			5 24 0 0 0 26 30 9 5	YLNTRLFTV	Q9C0B1|FTO_HUMAN	DB Search	YLNTRLFTV	YLNTRLFTV
733	KVTTSITSK	30.79	963.56	9	77.8	9	1.6	482.788	2	7.4641	-0.2388	0.9	366129	Neo_sh14_patient1_HLAI_0412_HM1114_tims_Slot1-36_1_3662.d	4437	0.8001	0.8098	0.035	367	7150	1	1	1	1			5 50 30 18 0 0 3 5 5	KVTTSITSK	O15117|FYB1_HUMAN	DB Search	KVTTSITSK	KVTTSITSK
734	TLNEKLFLL	29.68	1089.64	9	55.6	9	-3.7	545.827	2	54.3164	-0.6765	0.83	2680622	Neo_sh14_patient1_HLAI_0412_HM1114_tims_Slot1-36_1_3662.d	55142	0.8668	0.8765	0.0384			1	1	0	0			0 0 22 22 12 17 69 0 0	TLNEKLFLL	P48995|TRPC1_HUMAN	DB Search	TLNEKLFLL	TLNEKLFLL
735	LLYKYIVHK	40.23	1175.71	9	77.8	9	1.9	588.862	2	23.1237	0.5922	0.81	1150111	Neo_sh14_patient1_HLAI_0412_HM1114_tims_Slot1-36_1_3662.d	28315	0.9001	0.9098	0.065			1	1	0	0			5 23 56 56 33 14 14 0 0	LLYKYIVHK	O43237|DC1L2_HUMAN	DB Search	LLYKYIVHK	LLYKYIVHK
736	ALLETVNRL	30.41	1027.6	9	44.4	9	1.4	514.809	2	41.7493	-1.2087	0.81	2061670	Neo_sh14_patient1_HLAI_0412_HM1114_tims_Slot1-36_1_3662.d	45742	0.8454	0.8551	0.0297			1	1	0	0			0 0 38 49 10 7 0 0 0	ALLETVNRL	Q8IWJ2|GCC2_HUMAN	DB Search	ALLETVNRL	ALLETVNRL
737	ALYGVVNVK	27.65	961.56	9	44.4	9	3.3	481.789	2	34.6649	0.7521	0.73	1710537	Neo_sh14_patient1_HLAI_0412_HM1114_tims_Slot1-36_1_3662.d	37941	0.8354	0.8451	-0.0002			1	1	0	0			0 0 40 15 13 7 0 0 0	ALYGVVNVK	O94952|FBX21_HUMAN	DB Search	ALYGVVNVK	ALYGVVNVK
738	ALLEVLSQK	28.52	999.596	9	66.7	9	0.2	500.806	2	42.9506	-16.1017	0.87	2117634	Neo_sh14_patient1_HLAI_0412_HM1114_tims_Slot1-36_1_3662.d	46626	0.8191	0.8288	0.0361	612	6420	2	2	1	1			5 7 71 46 27 19 0 0 0	ALLEVLSQK	P21333|FLNA_HUMAN:Q14315|FLNC_HUMAN:O75369|FLNB_HUMAN	DB Search	ALLEVLSQK	ALLEVLSQK
739	AVYENAREK	46.25	1078.54	9	55.6	9	6.8	540.281	2	7.0457	1.5709	0.93	343228	Neo_sh14_patient1_HLAI_0412_HM1114_tims_Slot1-36_1_3662.d	3568	0.8695	0.8792	0.0157	6970	103000	2	2	1	1			5 8 53 31 6 1 0 1 1	AVYENAREK	Q75QN2|INT8_HUMAN	DB Search	AVYENAREK	AVYENAREK
740	QPADVFPRL	36.25	1041.56	9	88.9	9	-8.8	521.783	2	45.9884	1.6558	0.69	2270581	Neo_sh14_patient1_HLAI_0412_HM1114_tims_Slot1-36_1_3662.d	49021	0.8458	0.8555	0.0193			1	1	0	0			5 7 53 53 39 17 0 7 5	QPADVFPRL	Q16526|CRY1_HUMAN:Q49AN0|CRY2_HUMAN	DB Search	QPADVFPRL
741	HPPPGSHLL	19.98	953.508	9	55.6	9	14.5	477.768	2	16.7585	0.164	0.71	832535	Neo_sh14_patient1_HLAI_0412_HM1114_tims_Slot1-36_1_3662.d	19187	0.8249	0.8346	0.0002			5	5	0	0			5 23 92 13 0 0 22 0 0	HPPPGSHLL	P11473|VDR_HUMAN	DB Search	HPPPGSHLL
742	KVLNKVITV	12.93	1012.66	9	77.8	9	6.5	507.343	2	23.8818	0.1249	0.59	1187951	Neo_sh14_patient1_HLAI_0412_HM1114_tims_Slot1-36_1_3662.d	29435	0.8249	0.8346	0.0502			2	2	0	0			5 22 15 9 0 0 29 20 5	KVLNKVITV	Q2M389|WASC4_HUMAN	DB Search	KVLNKVITV	KVLNKVITV
743	VTFRPLFFK	41.62	1153.66	9	77.8	9	0.7	577.84	2	48.4102	-0.8196	0.7	2389976	Neo_sh14_patient1_HLAI_0412_HM1114_tims_Slot1-36_1_3662.d	50912	0.9292	0.9389	0.0059			3	3	0	0			5 19 8 3 0 0 38 23 5	VTFRPLFFK	Q9H583|HEAT1_HUMAN	DB Search	VTFRPLFFK	VTFRPLFFK
744	HPTMFIKTL	26.93	1086.59	9	22.2	9	-12.7	544.295	2	36.7866	2.2518	0.56	1815713	Neo_sh14_patient1_HLAI_0412_HM1114_tims_Slot1-36_1_3662.d	40301	0.8815	0.8912	0.0136			1	1	0	0			0 0 0 0 0 62 36 0 0	HPTMFIKTL	Q07960|RHG01_HUMAN	DB Search	HPTMFIKTL
745	IVAGSLITK	25.39	900.564	9	77.8	9	7.2	451.293	2	28.1027	0.4118	0.93	1388960	Neo_sh14_patient1_HLAI_0412_HM1114_tims_Slot1-36_1_3662.d	32156	0.7812	0.7908	0.024			3	3	0	0			5 31 16 6 2 2 2 0 0	IVAGSLITK	O75400|PR40A_HUMAN	DB Search	IVAGSLITK	IVAGSLITK
746	TPERVFVVM	23.83	1076.57	9	55.6	9	8.2	539.296	2	45.5341	0.4362	0.88	2248166	Neo_sh14_patient1_HLAI_0412_HM1114_tims_Slot1-36_1_3662.d	48638	0.842	0.8516	0.0332			1	1	0	0			4 4 0 0 0 0 74 39 5	TPERVFVVM	O94806|KPCD3_HUMAN:Q15139|KPCD1_HUMAN	DB Search	TPERVFVVM
747	KVSKELVEK	38.9	1058.63	9	100	9	-0.5	530.324	2	6.8341	-1.6122	0.9	335563	Neo_sh14_patient1_HLAI_0412_HM1114_tims_Slot1-36_1_3662.d	3247	0.8555	0.8652	0.0296	1110	16500	1	1	1	1			5 55 18 18 4 4 13 11 5	KVSKELVEK	Q9P2E9|RRBP1_HUMAN	DB Search	KVSKELVEK	KVSKELVEK
748	NLNEHNHHL	37.92	1126.53	9	55.6	9	2.4	564.272	2	6.3687	-0.4774	0.69	312804	Neo_sh14_patient1_HLAI_0412_HM1114_tims_Slot1-36_1_3662.d	2520	0.8768	0.8865	0.0183			1	1	0	0			5 19 15 0 0 6 21 0 0	NLNEHNHHL	P56545|CTBP2_HUMAN	DB Search	NLNEHNHHL	NLNEHNHHL
749	TVIHHVHSL	38.67	1041.57	9	77.8	9	0.5	521.794	2	11.5646	-2.2435	0.65	573102	Neo_sh14_patient1_HLAI_0412_HM1114_tims_Slot1-36_1_3662.d	11286	0.8664	0.8761	-0.0112			2	2	0	0			5 8 42 18 37 42 11 0 0	TVIHHVHSL	Q8WU67|ABHD3_HUMAN	DB Search	TVIHHVHSL	TVIHHVHSL
750	KVVEGSFVYK	52.62	1154.63	10	100	10	-1.3	578.323	2	21.4567	0.7289	0.85	1066991	Neo_sh14_patient1_HLAI_0412_HM1114_tims_Slot1-36_1_3662.d	25979	0.8928	0.9025	0.0324	2610	26900	2	2	1	1			5 24 57 26 9 6 6 27 8 5	KVVEGSFVYK	P31150|GDIA_HUMAN	DB Search	KVVEGSFVYK	KVVEGSFVYK
751	RIMEFTTTL	23.74	1110.57	9	44.4	9	-2.3	556.293	2	46.7074	-1.1955	0.53	2306040	Neo_sh14_patient1_HLAI_0412_HM1114_tims_Slot1-36_1_3662.d	49596	0.8749	0.8846	0.0202			1	1	0	0			0 0 0 13 0 0 51 20 5	RIMEFTTTL	P78527|PRKDC_HUMAN	DB Search	RIMEFTTTL	RIMEFTTTL
752	VLLSHLSYL	20.25	1043.6	9	44.4	9	-7.6	522.804	2	51.7411	0.5103	0.63	2553716	Neo_sh14_patient1_HLAI_0412_HM1114_tims_Slot1-36_1_3662.d	53084	0.8761	0.8858	0.0091			1	1	0	0			5 5 21 21 0 0 0 0 0	VLLSHLSYL	Q01543|FLI1_HUMAN	DB Search	VLLSHLSYL	VLLSHLSYL
753	KLHFIFRHK	20.54	1224.72	9	66.7	9	3	613.371	2	13.5464	1.8304	0.87	669881	Neo_sh14_patient1_HLAI_0412_HM1114_tims_Slot1-36_1_3662.d	14429	0.9374	0.9471	0.0278	882	11900	1	1	1	1			5 22 47 47 16 2 1 0 0	KLHFIFRHK	O14967|CLGN_HUMAN:P27824|CALX_HUMAN	DB Search	KLHFIFRHK	KLHFIFRHK
754	AAVPRAAFL	30.1	914.534	9	55.6	9	-3.4	458.273	2	39.8557	0.122	0.84	1967864	Neo_sh14_patient1_HLAI_0412_HM1114_tims_Slot1-36_1_3662.d	43736	0.7788	0.7885	0.0463	248	3750	2	2	1	1			5 7 17 0 0 1 1 8 5	AAVPRAAFL	P30040|ERP29_HUMAN	DB Search	AAVPRAAFL	AAVPRAAFL
755	RVIQRILEH	28.21	1162.69	9	33.3	9	7.6	388.575	3	17.0236	-0.5466	0.05	845793	Neo_sh14_patient1_HLAI_0412_HM1114_tims_Slot1-36_1_3662.d	19593	0.6787	0.6884	0.0465			1	1	0	0			0 0 0 1 0 1 2 5 5	RVIQRILEH	Q14671|PUM1_HUMAN:Q8TB72|PUM2_HUMAN	DB Search	RVIQRILEH	RVIQRILEH
756	AVKDAVGTLK	43.3	1000.59	10	60	10	1.5	501.304	2	15.2404	0.3669	0.8	755056	Neo_sh14_patient1_HLAI_0412_HM1114_tims_Slot1-36_1_3662.d	16984	0.8431	0.8528	0.022	633	11200	1	1	1	1			0 0 67 25 5 2 2 3 0 0	AVKDAVGTLK	Q7LBC6|KDM3B_HUMAN	DB Search	AVKDAVGTLK	AVKDAVGTLK
757	ALDSHPLSR	38.87	994.52	9	66.7	9	2.1	498.268	2	13.602	-0.4833	0.8	673670	Neo_sh14_patient1_HLAI_0412_HM1114_tims_Slot1-36_1_3662.d	14546	0.8427	0.8524	0.0124	614	10800	1	1	1	1			0 0 76 20 20 2 2 0 3	ALDSHPLSR	Q8IZY2|ABCA7_HUMAN	DB Search	ALDSHPLSR	ALDSHPLSR
758	FQYESKVFY	38.81	1209.57	9	100	9	2.8	605.794	2	40.6134	-2.1194	0.56	2005374	Neo_sh14_patient1_HLAI_0412_HM1114_tims_Slot1-36_1_3662.d	44526	0.9094	0.9191	0.0357	2200	27400	2	2	1	1			5 9 20 20 6 11 11 9 5	FQYESKVFY	Q04917|1433F_HUMAN	DB Search	FQYESKVFY	FQYESKVFY
759	YGVTVFKAL	29.75	996.564	9	33.3	9	5.7	499.292	2	49.0159	-2.642	0.76	2419807	Neo_sh14_patient1_HLAI_0412_HM1114_tims_Slot1-36_1_3662.d	51367	0.8164	0.8261	0.0388			2	2	0	0			5 0 0 39 39 0 0 0 0	YGVTVFKAL	Q32P28|P3H1_HUMAN	DB Search	YGVTVFKAL	YGVTVFKAL
760	LPDPGPPSL	14.47	891.47	9	22.2	9	4.4	446.744	2	45.9127	-4.6034	0.43	2266850	Neo_sh14_patient1_HLAI_0412_HM1114_tims_Slot1-36_1_3662.d	48962	0.7417	0.7514	0.0435			2	2	0	0			0 0 0 0 0 66 0 0 5	LPDPGPPSL	Q14653|IRF3_HUMAN	DB Search	LPDPGPPSL	LPDPGPPSL
761	FPVPPERAL	15.53	1024.57	9	77.8	9	7.3	513.296	2	41.9766	-1.1614	0.84	2072912	Neo_sh14_patient1_HLAI_0412_HM1114_tims_Slot1-36_1_3662.d	45968	0.8191	0.8288	0.0361			1	1	0	0			4 4 13 5 0 0 3 5 5	FPVPPERAL	O00562|PITM1_HUMAN	DB Search	FPVPPERAL
762	KLFEKVKEV	38.9	1118.67	9	100	9	0.6	560.343	2	18.4526	2.0734	0.74	913942	Neo_sh14_patient1_HLAI_0412_HM1114_tims_Slot1-36_1_3662.d	21646	0.8683	0.878	0.0468	5710	56800	3	3	1	1			5 40 11 10 10 10 26 26 5	KLFEKVKEV	Q96K12|FACR2_HUMAN	DB Search	KLFEKVKEV	KLFEKVKEV
763	TAIERSQTL	42.11	1017.55	9	77.8	9	3.3	509.782	2	17.7772	-3.1951	0.83	881788	Neo_sh14_patient1_HLAI_0412_HM1114_tims_Slot1-36_1_3662.d	20704	0.8144	0.8241	0.0407	230	4820	1	1	1	1			5 15 57 19 2 0 0 5 5	TAIERSQTL	Q9NRY5|F1142_HUMAN	DB Search	TAIERSQTL	TAIERSQTL
764	FPWNSHVVL	22.95	1097.57	9	33.3	9	0.7	549.791	2	53.6715	2.2269	0.51	2648608	Neo_sh14_patient1_HLAI_0412_HM1114_tims_Slot1-36_1_3662.d	54340	0.8311	0.8408	0.054			1	1	0	0			5 12 0 0 0 0 25 0 0	FPWNSHVVL	Q92508|PIEZ1_HUMAN	DB Search	FPWNSHVVL
765	NPFPHSHTF	41.35	1082.49	9	55.6	9	2.1	542.255	2	21.1112	-0.0432	0.87	1046192	Neo_sh14_patient1_HLAI_0412_HM1114_tims_Slot1-36_1_3662.d	25376	0.8524	0.8621	0.0027	1120	10300	1	1	1	1			1 1 16 24 4 4 3 0 0	NPFPHSHTF	Q9UKA4|AKA11_HUMAN	DB Search	NPFPHSHTF	NPFPHSHTF
766	FPVSEARVL	36.14	1016.57	9	55.6	9	1	509.291	2	40.2725	1.5123	0.86	1988528	Neo_sh14_patient1_HLAI_0412_HM1114_tims_Slot1-36_1_3662.d	44204	0.809	0.8187	0.0461			2	2	0	0			5 54 77 13 5 0 0 0 0	FPVSEARVL	P05106|ITB3_HUMAN	DB Search	FPVSEARVL	FPVSEARVL
767	LPTEKEVAL	37.76	998.565	9	100	9	0.6	500.29	2	33.1467	-1.6688	0.55	1635436	Neo_sh14_patient1_HLAI_0412_HM1114_tims_Slot1-36_1_3662.d	36280	0.8044	0.8141	0.0508	29500	246000	9	9	2	2			5 33 17 8 3 5 18 12 5	LPTEKEVAL	P27816|MAP4_HUMAN	DB Search	LPTEKEVAL	LPTEKEVAL
768	SAIGRAMEL	31.19	946.491	9	66.7	9	-3.6	474.251	2	33.679	1.3139	0.76	1661733	Neo_sh14_patient1_HLAI_0412_HM1114_tims_Slot1-36_1_3662.d	36873	0.7792	0.7889	0.0459			3	3	0	0			5 8 75 20 0 0 0 40 5	SAIGRAMEL	Q9NZN5|ARHGC_HUMAN	DB Search	SAIGRAMEL	SAIGRAMEL
769	HPESVSQSL	28.13	982.472	9	55.6	9	-0.4	492.243	2	16.8721	-1.1599	0.73	838205	Neo_sh14_patient1_HLAI_0412_HM1114_tims_Slot1-36_1_3662.d	19349	0.7885	0.7982	0.0567			2	2	0	0			0 0 0 0 25 65 65 71 5	HPESVSQSL	Q9UPW0|FOXJ3_HUMAN	DB Search	HPESVSQSL	HPESVSQSL
770	AVFPKPFVEK	35.73	1160.66	10	50	10	4.4	581.339	2	34.2359	-0.2045	0.78	1686096	Neo_sh14_patient1_HLAI_0412_HM1114_tims_Slot1-36_1_3662.d	37368	0.892	0.9017	0.0432	333	4060	1	1	1	1			0 0 47 18 18 1 2 2 0 0	AVFPKPFVEK	Q6PFW1|VIP1_HUMAN	DB Search	AVFPKPFVEK	AVFPKPFVEK
771	KAYGSVIHK	40.01	1001.57	9	77.8	9	2.5	501.791	2	8.1142	0.4605	0.77	400324	Neo_sh14_patient1_HLAI_0412_HM1114_tims_Slot1-36_1_3662.d	5584	0.8272	0.8369	0.0279			1	1	0	0			5 60 32 0 0 9 16 16 5	KAYGSVIHK	Q13105|ZBT17_HUMAN	DB Search	KAYGSVIHK	KAYGSVIHK
772	RIIDLVLQK	36.22	1096.7	9	100	9	6	549.359	2	40.6448	2.3284	0.74	2005383	Neo_sh14_patient1_HLAI_0412_HM1114_tims_Slot1-36_1_3662.d	44535	0.8489	0.8586	0.0662	607	8010	2	2	1	1			2 2 3 3 20 32 65 20 5	RIIDLVLQK	O15397|IPO8_HUMAN	DB Search	RIIDLVLQK	RIIDLVLQK
773	LPEPNHVML	46.47	1048.54	9	77.8	9	0.5	525.276	2	40.4241	1.5311	0.84	1996019	Neo_sh14_patient1_HLAI_0412_HM1114_tims_Slot1-36_1_3662.d	44351	0.8218	0.8315	0.0333			6	6	0	0			5 29 32 3 3 17 7 0 0	LPEPNHVML	O43741|AAKB2_HUMAN:Q9Y478|AAKB1_HUMAN	DB Search	LPEPNHVML
774	SLYQAMRQK	35.59	1123.58	9	44.4	9	-2.3	562.796	2	15.8731	-2.8171	0.81	787138	Neo_sh14_patient1_HLAI_0412_HM1114_tims_Slot1-36_1_3662.d	17854	0.8916	0.9013	0.0236	1210	14500	1	1	1	1			4 4 70 52 0 0 0 0 0	SLYQAMRQK	P58107|EPIPL_HUMAN	DB Search	SLYQAMRQK	SLYQAMRQK
775	RINVPMVRK	34.59	1111.66	9	44.4	9	2.6	371.563	3	18.3499	0.9014	0.75	912050	Neo_sh14_patient1_HLAI_0412_HM1114_tims_Slot1-36_1_3662.d	21590	0.6872	0.6969	0.028			3	3	0	0			0 0 2 13 36 6 0 0 0	RINVPMVRK	Q96QB1|RHG07_HUMAN	DB Search	RINVPMVRK	RINVPMVRK
776	RLM(+15.99)SLPIAK	30.72	1043.62	9	55.6	9	3.1	522.817	2	22.6973	0.739	0.87	1127427	Neo_sh14_patient1_HLAI_0412_HM1114_tims_Slot1-36_1_3662.d	27663	0.8423	0.852	0.0428	633	5740	2	2	1	1	Oxidation (M)	M3:Oxidation (M):1000.00	0 0 0 0 42 6 6 14 5	RLM(+15.99)SLPIAK	Q6UWU4|CF089_HUMAN	DB Search	RLMSLPIAK	RLMSLPIAK
777	ALYDNVEKL	26.05	1063.55	9	55.6	9	-2	532.784	2	38.5302	0.0361	0.9	1902183	Neo_sh14_patient1_HLAI_0412_HM1114_tims_Slot1-36_1_3662.d	42315	0.8536	0.8633	0.0316			2	2	0	0			0 0 55 11 6 6 2 0 0	ALYDNVEKL	P08243|ASNS_HUMAN	DB Search	ALYDNVEKL	ALYDNVEKL
778	KVSEFVASK	38.79	993.549	9	88.9	9	2.9	497.783	2	12.7795	0.1869	0.88	633900	Neo_sh14_patient1_HLAI_0412_HM1114_tims_Slot1-36_1_3662.d	13332	0.8075	0.8172	0.0377			1	1	0	0			5 41 13 13 2 8 4 0 5	KVSEFVASK	Q969K4|ABTB1_HUMAN	DB Search	KVSEFVASK	KVSEFVASK
779	SLQDEIQRV	40.19	1086.57	9	77.8	9	4.7	544.293	2	35.5673	0.4286	0.93	1753665	Neo_sh14_patient1_HLAI_0412_HM1114_tims_Slot1-36_1_3662.d	38841	0.8582	0.8679	0.0169	372	4250	1	1	1	1			3 3 93 32 26 25 3 0 0	SLQDEIQRV	Q9UNX4|WDR3_HUMAN	DB Search	SLQDEIQRV	SLQDEIQRV
780	SVFGTM(+15.99)PLK	14.91	994.516	9	22.2	9	10	498.27	2	30.2974	0.8211	0.86	1497102	Neo_sh14_patient1_HLAI_0412_HM1114_tims_Slot1-36_1_3662.d	33810	0.8121	0.8218	0.033			1	1	0	0	Oxidation (M)	M6:Oxidation (M):1000.00	0 0 58 10 0 0 0 0 0	SVFGTM(+15.99)PLK	Q93063|EXT2_HUMAN	DB Search	SVFGTMPLK	SVFGTMPLK
781	KLSGSLVAK	26.65	901.56	9	100	9	15.3	451.794	2	12.8555	0.7006	0.84	637706	Neo_sh14_patient1_HLAI_0412_HM1114_tims_Slot1-36_1_3662.d	13466	0.8083	0.8179	0.0169			1	1	0	0			5 87 14 6 6 6 12 19 5	KLSGSLVAK	Q86UU5|GGN_HUMAN	DB Search	KLSGSLVAK	KLSGSLVAK
782	QLVDIIEKV	31.2	1055.62	9	66.7	9	2.1	528.82	2	53.2169	0.6402	0.7	2626162	Neo_sh14_patient1_HLAI_0412_HM1114_tims_Slot1-36_1_3662.d	53926	0.8474	0.8571	0.0478			1	1	0	0			5 10 53 30 25 6 0 0 0	QLVDIIEKV	P61289|PSME3_HUMAN	DB Search	QLVDIIEKV	QLVDIIEKV
783	AVFTRFALK	29.59	1051.62	9	77.8	9	6	526.819	2	35.4987	-0.3201	0.87	1751794	Neo_sh14_patient1_HLAI_0412_HM1114_tims_Slot1-36_1_3662.d	38806	0.8575	0.8672	0.0377			1	1	0	0			5 8 37 0 0 4 19 19 5	AVFTRFALK	Q96EK7|F120B_HUMAN	DB Search	AVFTRFALK	AVFTRFALK
784	YAETIAHIL	36.39	1029.55	9	66.7	9	8.1	515.786	2	45.8732	0.3141	0.77	2263110	Neo_sh14_patient1_HLAI_0412_HM1114_tims_Slot1-36_1_3662.d	48894	0.8392	0.8489	0.0159	113	1700	1	1	1	1			5 47 32 24 24 46 0 0 0	YAETIAHIL	Q2TAA5|ALG11_HUMAN	DB Search	YAETIAHIL	YAETIAHIL
785	SLFRVITEV	19.57	1062.61	9	66.7	9	4.1	532.313	2	53.5579	-0.0359	0.56	2642991	Neo_sh14_patient1_HLAI_0412_HM1114_tims_Slot1-36_1_3662.d	54231	0.8633	0.873	0.0219			1	1	0	0			0 0 66 0 13 13 54 38 5	SLFRVITEV	Q93063|EXT2_HUMAN	DB Search	SLFRVITEV	SLFRVITEV
786	LPNHSVVKL	42.81	1005.6	9	100	9	-4	503.804	2	23.1237	-0.6332	0.75	1150132	Neo_sh14_patient1_HLAI_0412_HM1114_tims_Slot1-36_1_3662.d	28336	0.8222	0.8319	0.043			2	2	0	0			5 51 20 6 16 43 62 6 5	LPNHSVVKL	Q9BUJ0|ABHEA_HUMAN	DB Search	LPNHSVVKL
787	KTKDPIIREK	33.91	1226.73	10	50	10	-12.6	614.367	2	4.7026	-3.5199	0.8	230746	Neo_sh14_patient1_HLAI_0412_HM1114_tims_Slot1-36_1_3662.d	1246	0.9203	0.93	0.0148			6	6	0	0			5 13 10 10 1 0 0 0 0 5	KTKDPIIREK	Q9P291|ARMX1_HUMAN	DB Search	KTKDPIIREK	KTKDPIIREK
788	RPTDVTLTL	25.51	1014.57	9	55.6	9	1	508.293	2	39.9315	0.8172	0.8	1971616	Neo_sh14_patient1_HLAI_0412_HM1114_tims_Slot1-36_1_3662.d	43816	0.8338	0.8435	0.0213			2	2	0	0			0 0 0 0 9 9 67 27 5	RPTDVTLTL	Q6DN14|MCTP1_HUMAN	DB Search	RPTDVTLTL	RPTDVTLTL
789	LPSSFVEKL	40.33	1018.57	9	77.8	9	4.5	510.295	2	44.7338	-0.2377	0.81	2207071	Neo_sh14_patient1_HLAI_0412_HM1114_tims_Slot1-36_1_3662.d	47935	0.8334	0.8431	0.0217	8670	78100	4	4	1	1			5 80 63 24 5 5 8 0 0	LPSSFVEKL	Q96Q15|SMG1_HUMAN	DB Search	LPSSFVEKL	LPSSFVEKL
790	AIQDKLFQV	39.61	1060.59	9	100	9	5.3	531.306	2	45.9505	0.1404	0.73	2268727	Neo_sh14_patient1_HLAI_0412_HM1114_tims_Slot1-36_1_3662.d	49003	0.8602	0.8699	0.025			1	1	0	0			5 7 28 6 6 25 26 12 5	AIQDKLFQV	Q9BRQ6|MIC25_HUMAN	DB Search	AIQDKLFQV	AIQDKLFQV
791	HLYQESISK	28.82	1103.56	9	44.4	9	-6.2	552.784	2	14.2206	-0.9972	0.41	705865	Neo_sh14_patient1_HLAI_0412_HM1114_tims_Slot1-36_1_3662.d	15529	0.878	0.8877	0.0271			2	2	0	0			5 23 7 0 0 7 0 0 0	HLYQESISK	Q9C0D5|TANC1_HUMAN	DB Search	HLYQESISK	HLYQESISK
792	KMEEFVYKV	42.65	1171.59	9	77.8	9	11.2	586.811	2	32.5305	1.6843	0.64	1607335	Neo_sh14_patient1_HLAI_0412_HM1114_tims_Slot1-36_1_3662.d	35719	0.8768	0.8865	0.0483			1	1	0	0			5 11 3 3 12 29 81 0 0	KMEEFVYKV	Q96A54|PAQR1_HUMAN	DB Search	KMEEFVYKV	KMEEFVYKV
793	KVNTVPLKNK	42.27	1139.7	10	80	10	-9.8	570.853	2	8.9101	0.1395	0.81	440168	Neo_sh14_patient1_HLAI_0412_HM1114_tims_Slot1-36_1_3662.d	6872	0.8885	0.8982	0.0167			1	1	0	0			5 36 32 4 4 2 2 7 0 0	KVNTVPLKNK	Q9NU19|TB22B_HUMAN	DB Search	KVNTVPLKNK	KVNTVPLKNK
794	RLFNAIIHR	47.2	1138.67	9	55.6	9	-18.9	380.558	3	24.0714	0.7428	0.74	1197453	Neo_sh14_patient1_HLAI_0412_HM1114_tims_Slot1-36_1_3662.d	29757	0.6841	0.6938	0.0311			4	4	0	0			0 0 8 22 58 87 25 0 0	RLFNAIIHR	Q15149|PLEC_HUMAN	DB Search	RLFNAIIHR	RLFNAIIHR
795	RVFDVPIRR	38.94	1156.68	9	33.3	9	3.3	386.569	3	23.5029	-0.3849	0.78	1169061	Neo_sh14_patient1_HLAI_0412_HM1114_tims_Slot1-36_1_3662.d	28905	0.7069	0.7166	0.0383			2	2	0	0			1 1 0 10 18 4 0 0 0	RVFDVPIRR	Q9UK99|FBX3_HUMAN	DB Search	RVFDVPIRR	RVFDVPIRR
796	MPDHVIPEI	20.48	1049.52	9	55.6	9	-1.6	525.767	2	47.2813	0.8917	0.8	2330318	Neo_sh14_patient1_HLAI_0412_HM1114_tims_Slot1-36_1_3662.d	50006	0.8164	0.8261	0.0388	287	3330	1	1	1	1			5 0 0 0 12 67 3 0 5	MPDHVIPEI	Q8IX18|DHX40_HUMAN	DB Search	MPDHVIPEI	MPDHVIPEI
797	KLFDFVNAKK	41.25	1208.69	10	100	10	5.5	605.356	2	29.1623	1.6178	0.78	1441156	Neo_sh14_patient1_HLAI_0412_HM1114_tims_Slot1-36_1_3662.d	32944	0.8974	0.9071	0.0477			1	1	0	0			5 38 21 10 10 3 3 7 5 5	KLFDFVNAKK	Q08945|SSRP1_HUMAN	DB Search	KLFDFVNAKK	KLFDFVNAKK
798	VIDGHIYAV	36.09	985.523	9	100	9	5.1	493.771	2	35.5366	-0.6402	0.64	1753663	Neo_sh14_patient1_HLAI_0412_HM1114_tims_Slot1-36_1_3662.d	38839	0.8307	0.8404	0.0144			2	2	0	0			5 27 5 4 4 12 26 5 5	VIDGHIYAV	Q14145|KEAP1_HUMAN	DB Search	VIDGHIYAV	VIDGHIYAV
799	AMYTYFQAK	20.01	1121.52	9	33.3	9	-1.2	561.767	2	33.6245	-1.4683	0.84	1659832	Neo_sh14_patient1_HLAI_0412_HM1114_tims_Slot1-36_1_3662.d	36808	0.8877	0.8974	0.0074			1	1	0	0			0 0 82 40 21 0 0 0 0	AMYTYFQAK	O00391|QSOX1_HUMAN	DB Search	AMYTYFQAK	AMYTYFQAK
800	VLQEKIEVV	27.14	1055.62	9	88.9	9	-0.7	528.818	2	36.8245	2.8147	0.37	1817592	Neo_sh14_patient1_HLAI_0412_HM1114_tims_Slot1-36_1_3662.d	40344	0.8478	0.8575	0.0474			2	2	0	0			5 21 21 6 0 4 26 8 5	VLQEKIEVV	Q14BN4|SLMAP_HUMAN	DB Search	VLQEKIEVV	VLQEKIEVV
801	SLSEKTVLL	35.18	988.58	9	77.8	9	0.7	495.298	2	38.3725	0.2784	0.71	1890896	Neo_sh14_patient1_HLAI_0412_HM1114_tims_Slot1-36_1_3662.d	42044	0.8175	0.8272	0.0276	22300	232000	4	4	1	1			0 0 19 18 5 62 64 6 5	SLSEKTVLL	P13987|CD59_HUMAN	DB Search	SLSEKTVLL	SLSEKTVLL
802	LPDNVHYVF	30.42	1102.54	9	55.6	9	3.3	552.281	2	45.572	-1.381	0.71	2250023	Neo_sh14_patient1_HLAI_0412_HM1114_tims_Slot1-36_1_3662.d	48659	0.8575	0.8672	0.0177			1	1	0	0			5 20 19 5 0 0 20 0 0	LPDNVHYVF	P42285|MTREX_HUMAN	DB Search	LPDNVHYVF	LPDNVHYVF
803	VVYPKVIER	28.05	1101.65	9	66.7	9	4.9	551.837	2	23.7717	-0.0281	0.93	1180408	Neo_sh14_patient1_HLAI_0412_HM1114_tims_Slot1-36_1_3662.d	29236	0.8978	0.9075	0.0274	297	4110	1	1	1	1			5 5 40 25 14 3 0 0 0	VVYPKVIER	P30566|PUR8_HUMAN	DB Search	VVYPKVIER	VVYPKVIER
804	IVAGTLTNK	36.06	915.539	9	77.8	9	-6	458.774	2	17.4025	-0.3513	0.93	864743	Neo_sh14_patient1_HLAI_0412_HM1114_tims_Slot1-36_1_3662.d	20183	0.7823	0.792	0.0228	2170	29300	2	2	1	1			5 31 20 6 5 5 2 0 0	IVAGTLTNK	O75251|NDUS7_HUMAN	DB Search	IVAGTLTNK	IVAGTLTNK
805	DFDMTLSRF	25.79	1130.51	9	44.4	9	-1	566.26	2	53.8613	-0.7977	0.76	2658026	Neo_sh14_patient1_HLAI_0412_HM1114_tims_Slot1-36_1_3662.d	54578	0.8641	0.8737	0.0311			1	1	0	0			0 0 31 13 13 4 0 0 0	DFDMTLSRF	Q9H0P0|5NT3A_HUMAN:Q969T7|5NT3B_HUMAN	DB Search	DFDMTLSRF	DFDMTLSRF
806	ASNGRTLFK	36.32	992.54	9	77.8	9	-4.9	497.275	2	11.7544	-3.3708	0.6	582625	Neo_sh14_patient1_HLAI_0412_HM1114_tims_Slot1-36_1_3662.d	11629	0.8292	0.8389	0.026			2	2	0	0			5 16 33 0 0 17 33 31 5	ASNGRTLFK	O75165|DJC13_HUMAN	DB Search	ASNGRTLFK	ASNGRTLFK
807	KPTHVVVTL	26.59	992.602	9	66.7	9	-7.1	497.305	2	22.7068	0.2034	0.83	1129287	Neo_sh14_patient1_HLAI_0412_HM1114_tims_Slot1-36_1_3662.d	27687	0.8253	0.835	0.0299			1	1	0	0			5 0 0 0 49 98 68 7 5	KPTHVVVTL	Q14690|RRP5_HUMAN	DB Search	KPTHVVVTL	KPTHVVVTL
808	RTLPFYFVQK	40.04	1297.72	10	60	10	5.4	649.87	2	42.8092	-0.8663	0.9	2113902	Neo_sh14_patient1_HLAI_0412_HM1114_tims_Slot1-36_1_3662.d	46566	0.9285	0.9382	0.0567			2	2	0	0			0 0 1 0 2 35 57 39 17 5	RTLPFYFVQK	Q9H0J9|PAR12_HUMAN	DB Search	RTLPFYFVQK	RTLPFYFVQK
809	KVTEGSFVYK	49.21	1156.61	10	100	10	-2.8	579.312	2	19.2716	1.1774	0.9	957442	Neo_sh14_patient1_HLAI_0412_HM1114_tims_Slot1-36_1_3662.d	22918	0.8811	0.8908	0.034	27300	279000	4	4	1	1			5 40 16 16 4 3 4 26 8 5	KVTEGSFVYK	P50395|GDIB_HUMAN	DB Search	KVTEGSFVYK	KVTEGSFVYK
810	RSSLVITTK	40.08	1003.6	9	33.3	9	0.7	502.809	2	15.3194	0.829	0.42	760746	Neo_sh14_patient1_HLAI_0412_HM1114_tims_Slot1-36_1_3662.d	17166	0.8234	0.833	0.0418			1	1	0	0			0 0 0 0 34 36 56 0 0	RSSLVITTK	Q14722|KCAB1_HUMAN:Q13303|KCAB2_HUMAN	DB Search	RSSLVITTK	RSSLVITTK
811	RQAVPLFSK	42.32	1044.61	9	66.7	9	-5.8	523.308	2	23.3513	0.3993	0.87	1161536	Neo_sh14_patient1_HLAI_0412_HM1114_tims_Slot1-36_1_3662.d	28724	0.847	0.8567	0.0282	539	9940	2	2	1	1			2 0 0 0 5 5 36 26 5	RQAVPLFSK	Q9BZZ5|API5_HUMAN	DB Search	RQAVPLFSK	RQAVPLFSK
812	ATTTTVTTK	14.06	922.497	9	44.4	9	4.6	462.258	2	4.135	-7.9027	0.7	203059	Neo_sh14_patient1_HLAI_0412_HM1114_tims_Slot1-36_1_3662.d	1099	0.7692	0.7788	0.026			5	5	0	0			5 11 38 9 0 0 0 0 0	ATTTTVTTK	Q86Z02|HIPK1_HUMAN	DB Search	ATTTTVTTK	ATTTTVTTK
813	RLSYNVREK	46	1163.64	9	77.8	9	3.2	388.889	3	10.7676	1.2696	0.74	533170	Neo_sh14_patient1_HLAI_0412_HM1114_tims_Slot1-36_1_3662.d	9910	0.7019	0.7115	0.0133			1	1	0	0			5 7 9 51 51 10 4 0 0	RLSYNVREK	Q13247|SRSF6_HUMAN	DB Search	RLSYNVREK	RLSYNVREK
814	APSTIIFHL	40.22	997.56	9	88.9	9	2.9	499.789	2	53.7853	-3.3434	0.84	2654245	Neo_sh14_patient1_HLAI_0412_HM1114_tims_Slot1-36_1_3662.d	54469	0.8427	0.8524	0.0024			2	2	0	0			5 41 47 33 33 37 32 1 3	APSTIIFHL	P04844|RPN2_HUMAN	DB Search	APSTIIFHL	APSTIIFHL
815	KLYELIITRY	42.52	1310.76	10	80	10	-2.8	656.385	2	46.1776	-0.3695	0.75	2279893	Neo_sh14_patient1_HLAI_0412_HM1114_tims_Slot1-36_1_3662.d	49153	0.9463	0.956	0.0488			1	1	0	0			5 25 34 34 7 7 7 4 0 0	KLYELIITRY	P07384|CAN1_HUMAN	DB Search	KLYELIITRY	KLYELIITRY
816	VLNGNPLLH	39.99	975.55	9	66.7	9	2	488.783	2	35.6124	3.7081	0.75	1757435	Neo_sh14_patient1_HLAI_0412_HM1114_tims_Slot1-36_1_3662.d	38939	0.8249	0.8346	0.0202			4	4	0	0			5 21 31 14 14 7 0 0 0	VLNGNPLLH	Q13045|FLII_HUMAN	DB Search	VLNGNPLLH	VLNGNPLLH
817	GVMDYYLKY	31.12	1150.54	9	55.6	9	-2.7	576.274	2	49.3188	-0.4105	0.74	2434713	Neo_sh14_patient1_HLAI_0412_HM1114_tims_Slot1-36_1_3662.d	51585	0.8854	0.8951	0.0398			2	2	0	0			0 0 77 74 44 17 12 0 0	GVMDYYLKY	O95365|ZBT7A_HUMAN	DB Search	GVMDYYLKY	GVMDYYLKY
818	LLNRHILAH	27.78	1085.65	9	55.6	9	3.8	543.832	2	17.251	0.015	0.83	857150	Neo_sh14_patient1_HLAI_0412_HM1114_tims_Slot1-36_1_3662.d	19934	0.8962	0.9059	0.0189			1	1	0	0			0 0 0 0 15 42 42 61 5	LLNRHILAH	Q96BR6|ZN669_HUMAN	DB Search	LLNRHILAH	LLNRHILAH
819	YFDPANGKF	35.7	1057.49	9	77.8	9	0	529.751	2	37.4844	2.5298	0.9	1845808	Neo_sh14_patient1_HLAI_0412_HM1114_tims_Slot1-36_1_3662.d	41020	0.842	0.8516	0.0232	12300	116000	3	3	1	1			5 21 50 4 4 3 3 0 0	YFDPANGKF	P13639|EF2_HUMAN	DB Search	YFDPANGKF	YFDPANGKF
820	FANDANKVL	32.43	990.513	9	100	9	3.7	496.266	2	24.2608	-3.4791	0.46	1206884	Neo_sh14_patient1_HLAI_0412_HM1114_tims_Slot1-36_1_3662.d	30008	0.7997	0.8094	0.0454			1	1	0	0			5 3 3 3 3 3 10 3 3	FANDANKVL	Q14571|ITPR2_HUMAN	DB Search	FANDANKVL	FANDANKVL
821	FPNPVRTVF	31.55	1075.58	9	55.6	9	-5.9	538.795	2	49.5081	-0.7218	0.91	2444020	Neo_sh14_patient1_HLAI_0412_HM1114_tims_Slot1-36_1_3662.d	51712	0.8218	0.8315	0.0433			4	4	0	0			5 12 70 0 0 0 0 3 5	FPNPVRTVF	Q16678|CP1B1_HUMAN	DB Search	FPNPVRTVF
822	LPDQSHPAL	23.76	976.498	9	55.6	9	2.7	489.257	2	23.6166	-0.7947	0.61	1174737	Neo_sh14_patient1_HLAI_0412_HM1114_tims_Slot1-36_1_3662.d	29073	0.7842	0.7939	0.0409			1	1	0	0			5 51 4 0 0 10 0 0 5	LPDQSHPAL	Q8IUD6|RN135_HUMAN	DB Search	LPDQSHPAL
823	KLYAQVKQK	45.43	1104.67	9	77.8	9	5	553.343	2	6.7701	-0.7114	0.93	329897	Neo_sh14_patient1_HLAI_0412_HM1114_tims_Slot1-36_1_3662.d	3089	0.9017	0.9114	0.0035	1080	13900	2	2	1	1			5 45 46 12 12 13 16 1 1	KLYAQVKQK	Q9Y4X5|ARI1_HUMAN	DB Search	KLYAQVKQK	KLYAQVKQK
824	FPEERPEVL	28.84	1114.57	9	66.7	9	2.9	558.292	2	37.6209	-1.4934	0.72	1857126	Neo_sh14_patient1_HLAI_0412_HM1114_tims_Slot1-36_1_3662.d	41322	0.8516	0.8613	0.0335			1	1	0	0			5 70 25 5 0 0 0 9 5	FPEERPEVL	Q9NRP7|STK36_HUMAN	DB Search	FPEERPEVL	FPEERPEVL
825	KIMSSPLSK	40.65	989.558	9	77.8	9	-2	495.785	2	17.2131	-0.0228	0.79	855253	Neo_sh14_patient1_HLAI_0412_HM1114_tims_Slot1-36_1_3662.d	19873	0.8117	0.8214	0.0434			1	1	0	0			5 26 16 10 10 1 1 3 3	KIMSSPLSK	Q9UNX3|RL26L_HUMAN:P61254|RL26_HUMAN	DB Search	KIMSSPLSK	KIMSSPLSK
826	VLFPSTTKK	27.96	1019.6	9	66.7	9	-0.7	510.808	2	19.1459	-1.796	0.85	951788	Neo_sh14_patient1_HLAI_0412_HM1114_tims_Slot1-36_1_3662.d	22772	0.8377	0.8474	0.0275			1	1	0	0			5 31 93 9 2 2 0 0 0	VLFPSTTKK	O15446|RPA34_HUMAN	DB Search	VLFPSTTKK
827	SVNNPILRK	31.26	1039.61	9	66.7	9	4.2	520.816	2	16.7585	-0.0505	0.85	832532	Neo_sh14_patient1_HLAI_0412_HM1114_tims_Slot1-36_1_3662.d	19184	0.8516	0.8613	0.0135			1	1	0	0			5 5 7 7 2 2 0 0 0	SVNNPILRK	Q8IW41|MAPK5_HUMAN	DB Search	SVNNPILRK	SVNNPILRK
828	VM(+15.99)DSKIVQV	33.66	1033.55	9	66.7	9	-0.1	517.781	2	23.3985	-2.9989	0.71	1161537	Neo_sh14_patient1_HLAI_0412_HM1114_tims_Slot1-36_1_3662.d	28725	0.8416	0.8513	0.0236	487	10000	2	2	1	1	Oxidation (M)	M2:Oxidation (M):1000.00	5 28 15 0 7 23 52 0 0	VM(+15.99)DSKIVQV	P52294|IMA5_HUMAN:O60684|IMA7_HUMAN:O15131|IMA6_HUMAN	DB Search	VMDSKIVQV	VMDSKIVQV
829	STFSAPLNK	29.12	963.503	9	33.3	9	-11.6	482.753	2	22.8206	-0.6165	0.67	1135011	Neo_sh14_patient1_HLAI_0412_HM1114_tims_Slot1-36_1_3662.d	27903	0.7846	0.7943	0.0405			2	2	0	0			0 0 69 56 22 0 0 0 0	STFSAPLNK	Q9H6R7|WDCP_HUMAN	DB Search	STFSAPLNK	STFSAPLNK
830	RIHGSPLQK	52.84	1034.6	9	55.6	9	-1	345.873	3	7.3937	-1.1273	0.77	364241	Neo_sh14_patient1_HLAI_0412_HM1114_tims_Slot1-36_1_3662.d	4385	0.688	0.6976	0.0172	1870	33100	6	6	1	1			0 0 8 11 19 12 11 0 0	RIHGSPLQK	O00566|MPP10_HUMAN	DB Search	RIHGSPLQK	RIHGSPLQK
831	TVYRGLVQK	36.6	1062.62	9	77.8	9	-0.5	532.316	2	15.5466	-0.9865	0.83	772045	Neo_sh14_patient1_HLAI_0412_HM1114_tims_Slot1-36_1_3662.d	17449	0.885	0.8947	0.0202			1	1	0	0			3 3 0 0 4 10 70 14 5	TVYRGLVQK	Q15527|SURF2_HUMAN	DB Search	TVYRGLVQK	TVYRGLVQK
832	ITAPPSRVL	32	952.571	9	66.7	9	-4.6	477.29	2	30.7895	0.681	0.91	1521365	Neo_sh14_patient1_HLAI_0412_HM1114_tims_Slot1-36_1_3662.d	34205	0.7827	0.7924	0.0425			5	5	0	0			5 39 70 59 6 0 0 0 3	ITAPPSRVL	O00767|SCD_HUMAN	DB Search	ITAPPSRVL	ITAPPSRVL
833	FTADVRSVL	20.43	1006.54	9	66.7	9	6.4	504.283	2	44.2473	0.483	0.77	2184713	Neo_sh14_patient1_HLAI_0412_HM1114_tims_Slot1-36_1_3662.d	47609	0.8183	0.828	0.0368			1	1	0	0			5 42 62 62 0 0 0 4 4	FTADVRSVL	O95476|CNEP1_HUMAN	DB Search	FTADVRSVL	FTADVRSVL
834	RVWQGTMEK	36.23	1133.57	9	77.8	9	-8.1	567.785	2	14.3342	-1.6434	0.78	711513	Neo_sh14_patient1_HLAI_0412_HM1114_tims_Slot1-36_1_3662.d	15669	0.8768	0.8865	0.0283			1	1	0	0			4 3 0 0 11 11 25 30 5	RVWQGTMEK	P27987|IP3KB_HUMAN	DB Search	RVWQGTMEK	RVWQGTMEK
835	ATITKVLQK	45.38	1000.63	9	100	9	2.5	501.323	2	17.7814	-3.191	0.78	883679	Neo_sh14_patient1_HLAI_0412_HM1114_tims_Slot1-36_1_3662.d	20759	0.8485	0.8582	0.0266			2	2	0	0			3 3 84 35 10 8 9 6 5	ATITKVLQK	Q9BYK8|HELZ2_HUMAN	DB Search	ATITKVLQK	ATITKVLQK
836	RVFSNKLLEK	34.83	1232.72	10	20	10	5.5	411.918	3	18.9944	-0.1095	0.5	944233	Neo_sh14_patient1_HLAI_0412_HM1114_tims_Slot1-36_1_3662.d	22561	0.7131	0.7227	0.0421			1	1	0	0			0 0 0 0 84 34 0 0 0 0	RVFSNKLLEK	O75881|CP7B1_HUMAN	DB Search	RVFSNKLLEK	RVFSNKLLEK
837	HAAHIISEL	27.35	989.529	9	44.4	9	6	495.775	2	23.6924	1.105	0.85	1178491	Neo_sh14_patient1_HLAI_0412_HM1114_tims_Slot1-36_1_3662.d	29155	0.8218	0.8315	0.0333			1	1	0	0			0 0 0 17 40 39 14 0 0	HAAHIISEL	Q96I24|FUBP3_HUMAN	DB Search	HAAHIISEL	HAAHIISEL
838	GVYGSFASK	23.31	914.45	9	33.3	9	-0.4	458.232	2	20.2447	-1.9452	0.76	1006593	Neo_sh14_patient1_HLAI_0412_HM1114_tims_Slot1-36_1_3662.d	24333	0.7955	0.8052	0.0097			1	1	0	0			0 0 47 6 5 0 0 0 0	GVYGSFASK	O14977|AZIN1_HUMAN	DB Search	GVYGSFASK	GVYGSFASK
839	QLYKSLQQK	36.93	1134.64	9	77.8	9	7	568.331	2	13.614	0.3007	0.88	675573	Neo_sh14_patient1_HLAI_0412_HM1114_tims_Slot1-36_1_3662.d	14613	0.9067	0.9164	0.0284			1	1	0	0			5 20 90 93 20 7 2 0 0	QLYKSLQQK	Q9BWW8|APOL6_HUMAN	DB Search	QLYKSLQQK	QLYKSLQQK
840	VADTVARVL	25.44	942.55	9	66.7	9	-4.9	472.28	2	33.7547	1.9015	0.82	1665472	Neo_sh14_patient1_HLAI_0412_HM1114_tims_Slot1-36_1_3662.d	36940	0.7982	0.8079	0.027			1	1	0	0			5 90 31 15 12 7 0 0 0	VADTVARVL	Q9NYY3|PLK2_HUMAN	DB Search	VADTVARVL	VADTVARVL
841	NAVSVHHAL	32.91	946.498	9	55.6	9	1.4	474.257	2	13.5761	-0.6951	0.85	673671	Neo_sh14_patient1_HLAI_0412_HM1114_tims_Slot1-36_1_3662.d	14547	0.8241	0.8338	-0.009			1	1	0	0			5 14 49 1 1 27 6 0 0	NAVSVHHAL	Q9NYI0|PSD3_HUMAN	DB Search	NAVSVHHAL	NAVSVHHAL
842	RLYDAYELK	35.46	1169.61	9	66.7	9	3.4	585.813	2	24.6021	-3.2363	0.87	1224078	Neo_sh14_patient1_HLAI_0412_HM1114_tims_Slot1-36_1_3662.d	30678	0.9366	0.9463	-0.0015			1	1	0	0			0 0 0 2 47 57 83 13 5	RLYDAYELK	P08758|ANXA5_HUMAN	DB Search	RLYDAYELK	RLYDAYELK
843	VTHNPMIQK	47.89	1066.56	9	77.8	9	6.1	534.29	2	11.3369	-0.155	0.6	561724	Neo_sh14_patient1_HLAI_0412_HM1114_tims_Slot1-36_1_3662.d	10924	0.8745	0.8842	0.0006			1	1	0	0			0 0 38 29 38 38 28 10 5	VTHNPMIQK	O15541|R113A_HUMAN	DB Search	VTHNPMIQK	VTHNPMIQK
844	HPSIVKETL	27.24	1022.58	9	66.7	9	6.6	512.299	2	21.04	-0.1144	0.39	1046214	Neo_sh14_patient1_HLAI_0412_HM1114_tims_Slot1-36_1_3662.d	25398	0.8431	0.8528	0.032			1	1	0	0			5 12 32 17 14 12 0 0 0	HPSIVKETL	Q96T76|MMS19_HUMAN	DB Search	HPSIVKETL	HPSIVKETL
845	LPEKEVLVL	22.29	1038.63	9	33.3	9	0.8	520.324	2	46.5545	-2.6752	0.83	2294834	Neo_sh14_patient1_HLAI_0412_HM1114_tims_Slot1-36_1_3662.d	49406	0.8582	0.8679	0.0169	1260	17000	1	1	1	1			0 0 0 0 3 32 80 1 1	LPEKEVLVL	Q13371|PHLP_HUMAN	DB Search	LPEKEVLVL
846	RTSIPVHSK	41.69	1023.58	9	77.8	9	6.1	512.802	2	7.0147	-0.9352	0.89	345125	Neo_sh14_patient1_HLAI_0412_HM1114_tims_Slot1-36_1_3662.d	3629	0.8338	0.8435	0.0313	183	3250	1	1	1	1			4 2 2 4 7 7 38 0 0	RTSIPVHSK	Q96QT4|TRPM7_HUMAN	DB Search	RTSIPVHSK	RTSIPVHSK
847	RTYYSPVYR	39.79	1203.6	9	44.4	9	4.2	602.812	2	19.3353	0.7714	0.63	961200	Neo_sh14_patient1_HLAI_0412_HM1114_tims_Slot1-36_1_3662.d	23004	0.9199	0.9296	0.0152			1	1	0	0			0 0 3 3 1 1 0 3 4	RTYYSPVYR	Q99569|PKP4_HUMAN	DB Search	RTYYSPVYR	RTYYSPVYR
848	ILNNKLISK	36.94	1041.65	9	77.8	9	2.4	521.836	2	20.238	0.5914	0.88	1002808	Neo_sh14_patient1_HLAI_0412_HM1114_tims_Slot1-36_1_3662.d	24220	0.8478	0.8575	0.0474	6080	84600	3	3	1	1			5 50 20 16 5 28 4 0 0	ILNNKLISK	Q9ULX6|AKP8L_HUMAN	DB Search	ILNNKLISK	ILNNKLISK
849	AIASTLVHK	36.27	938.555	9	55.6	9	1.8	470.286	2	16.6069	-4.3046	0.89	824929	Neo_sh14_patient1_HLAI_0412_HM1114_tims_Slot1-36_1_3662.d	18925	0.8013	0.811	0.0339			1	1	0	0			1 1 24 4 2 2 7 0 1	AIASTLVHK	P51003|PAPOA_HUMAN	DB Search	AIASTLVHK	AIASTLVHK
850	SLFPKALQR	26.2	1058.62	9	44.4	9	-3.1	530.317	2	31.0545	1.1409	0.9	1534460	Neo_sh14_patient1_HLAI_0412_HM1114_tims_Slot1-36_1_3662.d	34448	0.878	0.8877	0.0171			2	2	0	0			0 0 12 18 18 2 1 0 0	SLFPKALQR	O43306|ADCY6_HUMAN	DB Search	SLFPKALQR	SLFPKALQR
851	SSAPPLTGK	28.86	856.465	9	66.7	9	3.4	429.241	2	13.1589	-3.0657	0.86	652836	Neo_sh14_patient1_HLAI_0412_HM1114_tims_Slot1-36_1_3662.d	13908	0.734	0.7436	0.0312			2	2	0	0			3 3 30 36 2 2 0 0 0	SSAPPLTGK	Q9HBE1|PATZ1_HUMAN	DB Search	SSAPPLTGK	SSAPPLTGK
852	HPVSGKHIL	40.83	986.566	9	100	9	3.5	494.292	2	10.3883	0.8903	0.72	514113	Neo_sh14_patient1_HLAI_0412_HM1114_tims_Slot1-36_1_3662.d	9213	0.8303	0.84	0.0048			1	1	0	0			5 50 50 9 4 4 3 3 5	HPVSGKHIL	Q9BW91|NUDT9_HUMAN	DB Search	HPVSGKHIL	HPVSGKHIL
853	KSLKPLLEK	37.93	1054.67	9	100	9	-0.4	528.345	2	14.0313	0.8715	0.88	696400	Neo_sh14_patient1_HLAI_0412_HM1114_tims_Slot1-36_1_3662.d	15244	0.8431	0.8528	0.052			1	1	0	0			5 15 15 22 5 5 8 8 5	KSLKPLLEK	Q9Y543|HES2_HUMAN	DB Search	KSLKPLLEK
854	KVKTQLVSK	11.53	1029.65	9	33.3	9	11.9	515.841	2	5.0053	-2.747	0.67	245611	Neo_sh14_patient1_HLAI_0412_HM1114_tims_Slot1-36_1_3662.d	1423	0.8462	0.8559	0.0289			2	2	0	0			5 71 17 0 0 0 0 0 0	KVKTQLVSK	Q14149|MORC3_HUMAN	DB Search	KVKTQLVSK	KVKTQLVSK
855	LPFQFAHHL	52.34	1108.58	9	77.8	9	2.5	555.3	2	41.863	-1.32	0.79	2067285	Neo_sh14_patient1_HLAI_0412_HM1114_tims_Slot1-36_1_3662.d	45849	0.9102	0.9199	-0.0151			1	1	0	0			5 68 65 40 22 22 26 0 0	LPFQFAHHL	Q9H6S0|YTDC2_HUMAN	DB Search	LPFQFAHHL	LPFQFAHHL
856	KLSGLLRQK	25.14	1041.67	9	55.6	9	1.2	521.841	2	13.2727	2.3717	0.9	658539	Neo_sh14_patient1_HLAI_0412_HM1114_tims_Slot1-36_1_3662.d	14103	0.8714	0.8811	0.0137			1	1	0	0			5 61 8 6 6 0 0 0 0	KLSGLLRQK	Q6UWJ1|TMCO3_HUMAN	DB Search	KLSGLLRQK	KLSGLLRQK
857	MPQPPHGHVL	49.14	1111.56	10	80	10	11.4	556.793	2	23.4271	6.3128	0.86	1165317	Neo_sh14_patient1_HLAI_0412_HM1114_tims_Slot1-36_1_3662.d	28833	0.8563	0.866	0.0289	1060	7640	6	6	1	1			4 4 4 7 7 2 2 3 0 0	MPQPPHGHVL	Q12888|TP53B_HUMAN	DB Search	MPQPPHGHVL	MPQPPHGHVL
858	VPVSRDFTL	28.39	1032.56	9	55.6	9	0	517.287	2	40.0464	-0.3997	0.73	1975357	Neo_sh14_patient1_HLAI_0412_HM1114_tims_Slot1-36_1_3662.d	43885	0.8168	0.8265	0.0484	643	6320	2	2	1	1			5 76 42 1 1 0 0 5 5	VPVSRDFTL	P32019|I5P2_HUMAN	DB Search	VPVSRDFTL
859	KTFSEVLAEK	46.08	1150.62	10	100	10	5.5	576.322	2	23.3513	-0.0128	0.77	1161524	Neo_sh14_patient1_HLAI_0412_HM1114_tims_Slot1-36_1_3662.d	28712	0.8745	0.8842	0.0406			1	1	0	0			5 56 56 9 6 6 7 5 6 5	KTFSEVLAEK	O75152|ZC11A_HUMAN	DB Search	KTFSEVLAEK	KTFSEVLAEK
860	TVFEHTFHV	21.04	1115.54	9	33.3	9	6.6	558.781	2	34.9025	0.4622	0.7	1719893	Neo_sh14_patient1_HLAI_0412_HM1114_tims_Slot1-36_1_3662.d	38117	0.8858	0.8955	-0.0006	277	4750	1	1	1	1			0 0 11 11 0 6 0 0 0	TVFEHTFHV	P41250|GARS_HUMAN	DB Search	TVFEHTFHV	TVFEHTFHV
861	LPVDFHIKM	26.81	1098.59	9	55.6	9	-4.5	550.3	2	48.1832	-7.008	0.77	2378796	Neo_sh14_patient1_HLAI_0412_HM1114_tims_Slot1-36_1_3662.d	50748	0.8602	0.8699	0.035			1	1	0	0			5 34 51 39 0 0 7 0 0	LPVDFHIKM	Q969R5|LMBL2_HUMAN	DB Search	LPVDFHIKM	LPVDFHIKM
862	SLMPWFHGK	30.79	1101.54	9	44.4	9	0.9	551.779	2	41.03	-1.072	0.91	2026026	Neo_sh14_patient1_HLAI_0412_HM1114_tims_Slot1-36_1_3662.d	44982	0.8454	0.8551	0.0497			1	1	0	0			0 0 23 22 9 9 0 0 0	SLMPWFHGK	P41240|CSK_HUMAN:P42679|MATK_HUMAN	DB Search	SLMPWFHGK	SLMPWFHGK
863	IWEQHTVTL	23.12	1125.58	9	77.8	9	0.7	563.799	2	39.3633	-0.2818	0.68	1943468	Neo_sh14_patient1_HLAI_0412_HM1114_tims_Slot1-36_1_3662.d	43208	0.8834	0.8931	0.0017			1	1	0	0			5 34 27 24 0 0 20 20 5	IWEQHTVTL	Q07157|ZO1_HUMAN	DB Search	IWEQHTVTL	IWEQHTVTL
864	AVALPLQTK	35.47	939.575	9	66.7	9	2.9	470.796	2	34.4241	3.3789	0.94	1695490	Neo_sh14_patient1_HLAI_0412_HM1114_tims_Slot1-36_1_3662.d	37582	0.7889	0.7986	0.0363	4610	38200	3	3	1	1			4 4 26 26 6 6 0 0 0	AVALPLQTK	O43660|PLRG1_HUMAN	DB Search	AVALPLQTK	AVALPLQTK
865	RPNPITVIL	16.7	1021.63	9	44.4	9	-0.1	511.821	2	50.9204	1.1197	0.79	2511063	Neo_sh14_patient1_HLAI_0412_HM1114_tims_Slot1-36_1_3662.d	52659	0.8431	0.8528	0.022	189	2410	2	2	1	1			0 0 0 0 0 6 38 12 5	RPNPITVIL	P35555|FBN1_HUMAN	DB Search	RPNPITVIL	RPNPITVIL
866	KLEERVYNV	38.42	1148.62	9	66.7	9	-7.4	575.312	2	20.8128	-0.0377	0.85	1034864	Neo_sh14_patient1_HLAI_0412_HM1114_tims_Slot1-36_1_3662.d	25064	0.8865	0.8962	0.0286			1	1	0	0			5 93 34 8 1 1 1 3 3	KLEERVYNV	P21757|MSRE_HUMAN	DB Search	KLEERVYNV	KLEERVYNV
867	KLTEIRHEV	26.95	1123.63	9	55.6	9	2.1	562.826	2	13.6845	2.581	0.9	679364	Neo_sh14_patient1_HLAI_0412_HM1114_tims_Slot1-36_1_3662.d	14732	0.8749	0.8846	0.0302	286	5470	1	1	1	1			5 63 14 14 3 0 0 0 0	KLTEIRHEV	Q9UBW7|ZMYM2_HUMAN	DB Search	KLTEIRHEV	KLTEIRHEV
868	AIKFPASQK	21.51	988.571	9	44.4	9	13.1	495.299	2	17.2131	-1.477	0.61	855295	Neo_sh14_patient1_HLAI_0412_HM1114_tims_Slot1-36_1_3662.d	19915	0.8307	0.8404	0.0344			1	1	0	0			0 0 51 41 11 11 0 0 0	AIKFPASQK	Q9GZX5|ZN350_HUMAN	DB Search	AIKFPASQK	AIKFPASQK
869	SLKQKLVNK	24.28	1056.67	9	66.7	9	-0.6	529.34	2	8.1142	-2.3978	0.68	400323	Neo_sh14_patient1_HLAI_0412_HM1114_tims_Slot1-36_1_3662.d	5583	0.854	0.8637	0.0412			2	2	0	0			0 0 21 21 9 0 12 3 3	SLKQKLVNK	Q08AF3|SLFN5_HUMAN	DB Search	SLKQKLVNK	SLKQKLVNK
870	RPTSVDPAL	31.17	954.513	9	55.6	9	0.4	478.264	2	22.485	-0.3818	0.92	1117942	Neo_sh14_patient1_HLAI_0412_HM1114_tims_Slot1-36_1_3662.d	27358	0.7862	0.7959	0.049	1670	19800	4	4	1	1			0 0 0 0 5 7 7 7 5	RPTSVDPAL	Q9NZM5|NOP53_HUMAN	DB Search	RPTSVDPAL	RPTSVDPAL
871	AANPHSFVF	50.9	988.477	9	100	9	6.3	495.249	2	37.6966	1.1631	0.59	1860870	Neo_sh14_patient1_HLAI_0412_HM1114_tims_Slot1-36_1_3662.d	41394	0.8276	0.8373	-0.0025			2	2	0	0			5 8 9 11 8 7 43 15 5	AANPHSFVF	Q9NQ55|SSF1_HUMAN	DB Search	AANPHSFVF	AANPHSFVF
872	RLNKAILRY	41.09	1145.7	9	55.6	9	6.3	382.911	3	18.6152	1.3185	0.8	925310	Neo_sh14_patient1_HLAI_0412_HM1114_tims_Slot1-36_1_3662.d	21998	0.7023	0.7119	0.0429			2	2	0	0			0 0 5 9 90 50 5 0 0	RLNKAILRY	P35443|TSP4_HUMAN	DB Search	RLNKAILRY	RLNKAILRY
873	ALLARVLVK	20.68	981.67	9	55.6	9	-12.1	491.836	2	34.0961	3.6449	0.63	1682349	Neo_sh14_patient1_HLAI_0412_HM1114_tims_Slot1-36_1_3662.d	37293	0.8594	0.8691	0.0258			2	2	0	0			5 29 72 17 11 0 0 0 0	ALLARVLVK	Q9BZW5|TM6S1_HUMAN	DB Search	ALLARVLVK	ALLARVLVK
874	VPQHLVLVL	27.21	1016.64	9	77.8	9	2.4	509.328	2	53.6163	0.4427	0.86	2644858	Neo_sh14_patient1_HLAI_0412_HM1114_tims_Slot1-36_1_3662.d	54262	0.8497	0.8594	0.0154	57400	1000000	2	2	1	1			3 0 0 2 25 100 77 9 5	VPQHLVLVL	P12111|CO6A3_HUMAN	DB Search	VPQHLVLVL
875	VTAVPTLLK	27.2	940.596	9	55.6	9	-5.7	471.302	2	39.6664	0.9063	0.88	1958477	Neo_sh14_patient1_HLAI_0412_HM1114_tims_Slot1-36_1_3662.d	43529	0.7962	0.8059	0.0289			1	1	0	0			5 49 16 16 10 0 0 0 0	VTAVPTLLK	Q9BRA2|TXD17_HUMAN	DB Search	VTAVPTLLK	VTAVPTLLK
876	ALASHLIEA	33.68	923.508	9	100	9	0.1	462.761	2	32.1899	1.4923	0.74	1590493	Neo_sh14_patient1_HLAI_0412_HM1114_tims_Slot1-36_1_3662.d	35401	0.7943	0.804	0.0308	23700	174000	7	7	1	1			5 8 2 2 4 32 46 29 5	ALASHLIEA	Q9NZN4|EHD2_HUMAN	DB Search	ALASHLIEA	ALASHLIEA
877	HLAEKFRQK	40.42	1155.65	9	77.8	9	-3.2	386.223	3	6.2928	-1.0414	0.74	309062	Neo_sh14_patient1_HLAI_0412_HM1114_tims_Slot1-36_1_3662.d	2450	0.6714	0.681	0.0638	967	18000	2	2	1	1			5 46 20 17 17 14 0 0 5	HLAEKFRQK	Q08043|ACTN3_HUMAN:P35609|ACTN2_HUMAN:P12814|ACTN1_HUMAN:O43707|ACTN4_HUMAN	DB Search	HLAEKFRQK	HLAEKFRQK
878	VVLYPLVAK	31.12	1000.63	9	55.6	9	3.5	501.325	2	46.6696	1.4037	0.81	2304172	Neo_sh14_patient1_HLAI_0412_HM1114_tims_Slot1-36_1_3662.d	49564	0.8361	0.8458	0.029			2	2	0	0			5 24 65 100 16 0 0 0 0	VVLYPLVAK	O00170|AIP_HUMAN	DB Search	VVLYPLVAK	VVLYPLVAK
879	ATYHFIFAQK	37.91	1224.63	10	20	10	-0.1	613.322	2	35.6124	-1.9915	0.5	1757441	Neo_sh14_patient1_HLAI_0412_HM1114_tims_Slot1-36_1_3662.d	38945	0.899	0.9087	0.0462			2	2	0	0			0 0 0 0 0 60 35 0 0 0	ATYHFIFAQK	Q2LD37|K1109_HUMAN	DB Search	ATYHFIFAQK	ATYHFIFAQK
880	GLYYIHRNK	49.86	1162.62	9	77.8	9	3.5	582.322	2	13.3485	-5.4366	0.9	662327	Neo_sh14_patient1_HLAI_0412_HM1114_tims_Slot1-36_1_3662.d	14219	0.8896	0.8993	0.0455	13900	171000	7	7	1	1			0 0 38 99 83 13 5 3 3	GLYYIHRNK	P50750|CDK9_HUMAN	DB Search	GLYYIHRNK	GLYYIHRNK
881	HLNENIATY	39.92	1073.51	9	77.8	9	2.1	537.765	2	24.2229	-3.3216	0.91	1205000	Neo_sh14_patient1_HLAI_0412_HM1114_tims_Slot1-36_1_3662.d	29960	0.8272	0.8369	0.0479			1	1	0	0			0 0 2 6 14 74 49 5 5	HLNENIATY	Q9BQS7|HEPH_HUMAN	DB Search	HLNENIATY	HLNENIATY
882	HLKEDQTEY	45.35	1161.53	9	100	9	-0.2	581.772	2	10.5536	-1.1051	0.73	517948	Neo_sh14_patient1_HLAI_0412_HM1114_tims_Slot1-36_1_3662.d	9376	0.8768	0.8865	0.0383	58700	734000	3	3	1	1			5 30 4 4 19 78 79 79 5	HLKEDQTEY	P07900|HS90A_HUMAN:Q58FF6|H90B4_HUMAN:Q58FF7|H90B3_HUMAN:Q14568|HS902_HUMAN:P08238|HS90B_HUMAN	DB Search	HLKEDQTEY	HLKEDQTEY
883	RLFTDVLLH	39.96	1112.63	9	44.4	9	1.7	557.325	2	46.7452	-0.4939	0.94	2307895	Neo_sh14_patient1_HLAI_0412_HM1114_tims_Slot1-36_1_3662.d	49615	0.8889	0.8986	0.0263	438	7090	2	2	1	1			1 1 0 0 0 79 79 52 5	RLFTDVLLH	O14682|ENC1_HUMAN	DB Search	RLFTDVLLH	RLFTDVLLH
884	VIFKDFVNK	32.25	1108.63	9	88.9	9	3.7	555.323	2	33.6572	-1.4355	0.75	1657957	Neo_sh14_patient1_HLAI_0412_HM1114_tims_Slot1-36_1_3662.d	36769	0.8706	0.8803	0.0445	1730	15100	2	2	1	1			5 7 65 34 0 2 5 5 5	VIFKDFVNK	Q63HN8|RN213_HUMAN	DB Search	VIFKDFVNK	VIFKDFVNK
885	HLADTMIGK	53.13	984.506	9	100	9	1.5	493.261	2	18.4177	-0.6861	0.75	913930	Neo_sh14_patient1_HLAI_0412_HM1114_tims_Slot1-36_1_3662.d	21634	0.8067	0.8164	0.0585	383	6010	1	1	1	1			5 94 15 14 25 52 41 27 5	HLADTMIGK	Q9Y657|SPIN1_HUMAN	DB Search	HLADTMIGK	HLADTMIGK
886	TTAERVLMK	21.59	1047.57	9	77.8	9	-11.7	524.788	2	15.13	-2.3185	0.75	751295	Neo_sh14_patient1_HLAI_0412_HM1114_tims_Slot1-36_1_3662.d	16895	0.8365	0.8462	0.0486			1	1	0	0			5 9 23 4 0 0 5 36 5	TTAERVLMK	Q9H6S0|YTDC2_HUMAN	DB Search	TTAERVLMK	TTAERVLMK
887	NQKPPSAEY	38.45	1032.49	9	77.8	9	-2.3	517.25	2	13.2246	-2.1459	0.81	654704	Neo_sh14_patient1_HLAI_0412_HM1114_tims_Slot1-36_1_3662.d	13940	0.8137	0.8234	0.0315	3000	33500	2	2	1	1			0 0 50 29 10 20 20 30 5	NQKPPSAEY	Q9UPN3|MACF1_HUMAN:O94854|K0754_HUMAN	DB Search	NQKPPSAEY	NQKPPSAEY
888	TVKTETISF	23.47	1024.54	9	55.6	9	-1.4	513.279	2	33.1366	-0.63	0.77	1637315	Neo_sh14_patient1_HLAI_0412_HM1114_tims_Slot1-36_1_3662.d	36323	0.809	0.8187	0.0461			1	1	0	0			0 0 0 0 16 23 92 14 5	TVKTETISF	Q9Y2J2|E41L3_HUMAN	DB Search	TVKTETISF	TVKTETISF
889	GM(+15.99)DRYLIYV	27.56	1144.56	9	55.6	9	1.6	573.288	2	46.4751	2.5341	0.84	2291115	Neo_sh14_patient1_HLAI_0412_HM1114_tims_Slot1-36_1_3662.d	49359	0.885	0.8947	0.0302	1450	13200	4	4	1	1	Oxidation (M)	M2:Oxidation (M):1000.00	0 0 0 0 5 12 54 22 5	GM(+15.99)DRYLIYV	P05107|ITB2_HUMAN	DB Search	GMDRYLIYV	GMDRYLIYV
890	HLRDYFEEY	31.57	1270.56	9	77.8	9	9.9	636.294	2	34.2098	-3.3941	0.6	1687967	Neo_sh14_patient1_HLAI_0412_HM1114_tims_Slot1-36_1_3662.d	37403	0.916	0.9257	0.0391			2	2	0	0			4 4 0 0 12 32 52 80 5	HLRDYFEEY	P22626|ROA2_HUMAN	DB Search	HLRDYFEEY	HLRDYFEEY
891	GTTHNFLYK	53.98	1079.54	9	77.8	9	2.5	540.779	2	17.4187	-0.8001	0.75	864713	Neo_sh14_patient1_HLAI_0412_HM1114_tims_Slot1-36_1_3662.d	20153	0.8776	0.8873	0.0175	1630	19200	1	1	1	1			0 0 30 36 17 19 31 14 5	GTTHNFLYK	Q9UP65|PA24C_HUMAN	DB Search	GTTHNFLYK	GTTHNFLYK
892	QTAQIFFTK	37.28	1082.58	9	55.6	9	2.7	542.297	2	36.4458	2.0054	0.55	1798788	Neo_sh14_patient1_HLAI_0412_HM1114_tims_Slot1-36_1_3662.d	39900	0.8563	0.866	0.0289			2	2	0	0			5 9 63 56 0 0 21 0 0	QTAQIFFTK	Q8NCJ5|SPRY3_HUMAN	DB Search	QTAQIFFTK	QTAQIFFTK
893	KTNFRLLKR	16.08	1174.73	9	33.3	9	1.8	588.373	2	12.3266	0.6962	0.75	609191	Neo_sh14_patient1_HLAI_0412_HM1114_tims_Slot1-36_1_3662.d	12491	0.9036	0.9133	0.0315	1700	30300	2	2	1	1			2 0 0 0 0 1 1 2 5	KTNFRLLKR	Q9NRW3|ABC3C_HUMAN	DB Search	KTNFRLLKR	KTNFRLLKR
894	RM(+15.99)WEIAIQH	14.84	1198.59	9	66.7	9	0.3	600.303	2	30.0325	0.5076	0.73	1484012	Neo_sh14_patient1_HLAI_0412_HM1114_tims_Slot1-36_1_3662.d	33572	0.8924	0.9021	0.0328			1	1	0	0	Oxidation (M)	M2:Oxidation (M):1000.00	0 0 0 11 15 15 21 19 5	RM(+15.99)WEIAIQH	Q15139|KPCD1_HUMAN	DB Search	RMWEIAIQH	RMWEIAIQH
895	VVHGKVLQH	43.61	1015.59	9	66.7	9	3.1	508.805	2	6.2996	-7.9095	0.67	307158	Neo_sh14_patient1_HLAI_0412_HM1114_tims_Slot1-36_1_3662.d	2382	0.8524	0.8621	0.0227	1810	19000	1	1	1	1			0 0 63 18 0 9 16 22 5	VVHGKVLQH	Q9Y6C9|MTCH2_HUMAN	DB Search	VVHGKVLQH	VVHGKVLQH
896	M(+15.99)TMDRPLSH	14.56	1102.49	9	33.3	9	-8.6	552.247	2	12.8934	-1.8521	0.44	639575	Neo_sh14_patient1_HLAI_0412_HM1114_tims_Slot1-36_1_3662.d	13499	0.8435	0.8532	0.0416			1	1	0	0	Oxidation (M)	M1:Oxidation (M):14.04	5 0 0 0 0 0 0 40 5	M(+15.99)TMDRPLSH	Q9Y4H2|IRS2_HUMAN	DB Search	MTMDRPLSH	MTMDRPLSH
897	AVLTKQLLH	38.33	1021.63	9	77.8	9	3.3	511.823	2	23.7245	2.1774	0.81	1176614	Neo_sh14_patient1_HLAI_0412_HM1114_tims_Slot1-36_1_3662.d	29114	0.861	0.8706	0.0342	1700	18500	1	1	1	1			0 0 71 26 26 13 13 6 5	AVLTKQLLH	Q14094|CCNI_HUMAN	DB Search	AVLTKQLLH	AVLTKQLLH
898	FLDPRPLTV	48.9	1056.6	9	66.7	9	6	529.309	2	47.4908	-0.1528	0.9	2343368	Neo_sh14_patient1_HLAI_0412_HM1114_tims_Slot1-36_1_3662.d	50204	0.8404	0.8501	0.0347	44400	362000	6	6	1	1			5 6 16 2 1 0 0 2 2	FLDPRPLTV	Q16678|CP1B1_HUMAN	DB Search	FLDPRPLTV	FLDPRPLTV
899	FPDKVAIQL	31.45	1029.59	9	88.9	9	2.7	515.802	2	50.2652	0.9998	0.77	2481270	Neo_sh14_patient1_HLAI_0412_HM1114_tims_Slot1-36_1_3662.d	52242	0.8183	0.828	0.0468	6730	26400	4	4	1	1			5 62 8 0 7 31 88 26 5	FPDKVAIQL	P11217|PYGM_HUMAN:P11216|PYGB_HUMAN	DB Search	FPDKVAIQL	FPDKVAIQL
900	YPFSTSVKL	24.01	1040.55	9	66.7	9	-15.4	521.276	2	45.6477	-0.6611	0.78	2253755	Neo_sh14_patient1_HLAI_0412_HM1114_tims_Slot1-36_1_3662.d	48719	0.835	0.8447	0.0402			1	1	0	0			5 90 64 0 0 0 4 4 5	YPFSTSVKL	O95084|PRS23_HUMAN	DB Search	YPFSTSVKL	YPFSTSVKL
901	YLDEQIKKV	32.22	1134.63	9	55.6	9	5.8	568.325	2	22.5552	1.2795	0.86	1121722	Neo_sh14_patient1_HLAI_0412_HM1114_tims_Slot1-36_1_3662.d	27466	0.8633	0.873	0.0619			1	1	0	0			5 25 16 1 0 0 0 2 2	YLDEQIKKV	Q9H1H9|KI13A_HUMAN	DB Search	YLDEQIKKV	YLDEQIKKV
902	MALPSQHSL	23.64	982.491	9	66.7	9	6.1	492.256	2	32.1142	1.7612	0.75	1586767	Neo_sh14_patient1_HLAI_0412_HM1114_tims_Slot1-36_1_3662.d	35347	0.8094	0.8191	0.0257			2	2	0	0			5 12 12 5 5 0 0 0 5	MALPSQHSL	Q70SY1|CR3L2_HUMAN	DB Search	MALPSQHSL	MALPSQHSL
903	IADPRGNTL	33.94	955.509	9	33.3	9	4.3	478.764	2	20.3963	1.2924	0.89	1014108	Neo_sh14_patient1_HLAI_0412_HM1114_tims_Slot1-36_1_3662.d	24504	0.8199	0.8296	0.0053			2	2	0	0			5 5 5 1 0 0 0 1 1	IADPRGNTL	P14625|ENPL_HUMAN	DB Search	IADPRGNTL	IADPRGNTL
904	YLGPHIASV	27.62	955.513	9	66.7	9	0.2	478.764	2	36.673	-0.0388	0.81	1810075	Neo_sh14_patient1_HLAI_0412_HM1114_tims_Slot1-36_1_3662.d	40171	0.8164	0.8261	0.0088			1	1	0	0			5 68 22 22 0 0 0 22 5	YLGPHIASV	Q96GC9|VMP1_HUMAN	DB Search	YLGPHIASV	YLGPHIASV
905	YLYPDITRL	25.78	1152.62	9	66.7	9	-1.9	577.315	2	53.4443	0.0254	0.89	2637364	Neo_sh14_patient1_HLAI_0412_HM1114_tims_Slot1-36_1_3662.d	54112	0.9032	0.9129	0.0119			2	2	0	0			5 9 38 16 12 2 0 0 0	YLYPDITRL	P31641|SC6A6_HUMAN	DB Search	YLYPDITRL	YLYPDITRL
906	FAEGKPLEL	28.78	1002.54	9	66.7	9	-5.2	502.274	2	38.6438	-2.5665	0.85	1907839	Neo_sh14_patient1_HLAI_0412_HM1114_tims_Slot1-36_1_3662.d	42463	0.816	0.8257	0.0292			2	2	0	0			5 63 56 23 23 0 26 0 0	FAEGKPLEL	Q93033|IGSF2_HUMAN	DB Search	FAEGKPLEL	FAEGKPLEL
907	YPEELKPVL	42.77	1086.6	9	66.7	9	-1.9	544.304	2	43.3389	-4.3048	0.61	2139947	Neo_sh14_patient1_HLAI_0412_HM1114_tims_Slot1-36_1_3662.d	46907	0.8737	0.8834	0.0114			1	1	0	0			5 58 26 19 19 11 0 0 0	YPEELKPVL	Q5UIP0|RIF1_HUMAN	DB Search	YPEELKPVL	YPEELKPVL
908	FPAPGKTVTL	43.5	1029.59	10	60	10	2.3	515.801	2	40.3311	-2.086	0.85	1984754	Neo_sh14_patient1_HLAI_0412_HM1114_tims_Slot1-36_1_3662.d	44102	0.8637	0.8734	0.0015	2480	15200	1	1	1	1			1 1 65 6 6 4 3 6 0 0	FPAPGKTVTL	Q9H6A0|DEN2D_HUMAN	DB Search	FPAPGKTVTL	FPAPGKTVTL
909	IAISRTPVL	39.13	968.602	9	88.9	9	3.8	485.31	2	39.9315	0.6402	0.81	1971605	Neo_sh14_patient1_HLAI_0412_HM1114_tims_Slot1-36_1_3662.d	43805	0.7951	0.8048	0.0501	1640	22600	3	3	2	2			5 88 39 7 1 3 2 2 5	IAISRTPVL	Q9H3K2|GHITM_HUMAN	DB Search	IAISRTPVL	IAISRTPVL
910	LPDERTISL	20.39	1042.57	9	55.6	9	-8.7	522.286	2	39.477	-2.4011	0.81	1949090	Neo_sh14_patient1_HLAI_0412_HM1114_tims_Slot1-36_1_3662.d	43322	0.8489	0.8586	0.0162			1	1	0	0			5 72 32 3 0 0 1 1 4	LPDERTISL	Q05048|CSTF1_HUMAN	DB Search	LPDERTISL	LPDERTISL
911	NPDPAVYQL	30.63	1015.5	9	66.7	9	4.9	508.758	2	42.5064	-1.783	0.85	2099001	Neo_sh14_patient1_HLAI_0412_HM1114_tims_Slot1-36_1_3662.d	46353	0.7916	0.8013	0.0436			3	3	0	0			0 0 0 6 9 35 33 9 5	NPDPAVYQL	P0DTU3|TRAR2_HUMAN:P0DSE1|TRAR1_HUMAN:P01848|TRAC_HUMAN	DB Search	NPDPAVYQL
912	YPTISLHAL	42.81	1013.55	9	66.7	9	3.2	507.786	2	50.0382	2.9067	0.75	2470110	Neo_sh14_patient1_HLAI_0412_HM1114_tims_Slot1-36_1_3662.d	52098	0.847	0.8567	0.0082			2	2	0	0			5 29 51 51 12 12 0 0 0	YPTISLHAL	P54105|ICLN_HUMAN	DB Search	YPTISLHAL	YPTISLHAL
913	TLFWKPLSK	32.69	1118.65	9	33.3	9	-1.6	560.331	2	39.2119	-1.7291	0.9	1935965	Neo_sh14_patient1_HLAI_0412_HM1114_tims_Slot1-36_1_3662.d	43049	0.8792	0.8889	0.046			1	1	0	0			0 0 90 51 51 0 0 0 0	TLFWKPLSK	Q99650|OSMR_HUMAN	DB Search	TLFWKPLSK	TLFWKPLSK
914	GLYKAPLSK	41.07	975.575	9	55.6	9	2	488.796	2	18.9565	-0.4352	0.77	942318	Neo_sh14_patient1_HLAI_0412_HM1114_tims_Slot1-36_1_3662.d	22482	0.8373	0.847	0.0278	361	6370	2	2	1	1			0 0 43 43 61 18 0 0 5	GLYKAPLSK	Q8NBM4|UBAC2_HUMAN	DB Search	GLYKAPLSK	GLYKAPLSK
915	KLFAGLVHV	49.6	982.596	9	77.8	9	11.6	492.311	2	41.863	2.9257	0.59	2067296	Neo_sh14_patient1_HLAI_0412_HM1114_tims_Slot1-36_1_3662.d	45860	0.871	0.8807	-0.0159			1	1	0	0			5 38 25 11 11 24 44 0 0	KLFAGLVHV	Q9Y2S2|CRYL1_HUMAN	DB Search	KLFAGLVHV	KLFAGLVHV
916	KMFAEIMMK	37.26	1127.55	9	77.8	9	4.3	564.787	2	36.5215	1.0183	0.65	1802567	Neo_sh14_patient1_HLAI_0412_HM1114_tims_Slot1-36_1_3662.d	40007	0.8924	0.9021	0.0128			1	1	0	0			5 20 2 2 15 30 11 0 0	KMFAEIMMK	Q8WWY3|PRP31_HUMAN	DB Search	KMFAEIMMK	KMFAEIMMK
917	MPISSHVDL	36.13	997.49	9	77.8	9	3.2	499.754	2	37.4968	-0.33	0.76	1847701	Neo_sh14_patient1_HLAI_0412_HM1114_tims_Slot1-36_1_3662.d	41077	0.8141	0.8237	0.0111	904	11800	1	1	1	1			5 64 53 5 5 2 2 0 0	MPISSHVDL	Q9BVQ7|SPA5L_HUMAN	DB Search	MPISSHVDL	MPISSHVDL
918	HASDRIIAL	16.59	994.556	9	66.7	9	-3	498.284	2	24.6343	0.4684	0.78	1224114	Neo_sh14_patient1_HLAI_0412_HM1114_tims_Slot1-36_1_3662.d	30714	0.8195	0.8292	0.0457	1430	34900	1	1	1	1			5 64 3 3 0 0 0 5 5	HASDRIIAL	P29401|TKT_HUMAN	DB Search	HASDRIIAL	HASDRIIAL
919	SPHPAATAL	19.23	863.45	9	33.3	9	3	432.734	2	17.2131	-0.6023	0.59	855290	Neo_sh14_patient1_HLAI_0412_HM1114_tims_Slot1-36_1_3662.d	19910	0.7541	0.7637	0.0311	368	6910	2	2	1	1			0 0 0 0 0 0 23 23 5	SPHPAATAL	Q643R3|LPCT4_HUMAN	DB Search	SPHPAATAL	SPHPAATAL
920	KVIDEIYRV	32.86	1133.64	9	55.6	9	7.3	567.834	2	34.0582	2.913	0.92	1680468	Neo_sh14_patient1_HLAI_0412_HM1114_tims_Slot1-36_1_3662.d	37248	0.878	0.8877	0.0371			1	1	0	0			5 35 48 17 6 0 0 0 0	KVIDEIYRV	Q9NVF7|FBX28_HUMAN	DB Search	KVIDEIYRV	KVIDEIYRV
921	RM(+15.99)GTPHLQK	16.73	1082.57	9	55.6	9	11.4	542.296	2	6.0274	-1.5524	0.31	295907	Neo_sh14_patient1_HLAI_0412_HM1114_tims_Slot1-36_1_3662.d	2147	0.8299	0.8396	0.0552			1	1	0	0	Oxidation (M)	M2:Oxidation (M):1000.00	0 0 0 0 7 9 9 21 5	RM(+15.99)GTPHLQK	P50570|DYN2_HUMAN:Q9UQ16|DYN3_HUMAN	DB Search	RMGTPHLQK	RMGTPHLQK
922	TPIREQHVL	40.79	1091.61	9	77.8	9	-1.4	546.811	2	18.447	0.539	0.76	915812	Neo_sh14_patient1_HLAI_0412_HM1114_tims_Slot1-36_1_3662.d	21680	0.8563	0.866	0.0389	11700	111000	2	2	1	1			5 5 1 1 5 10 65 19 5	TPIREQHVL	A2A288|ZC12D_HUMAN	DB Search	TPIREQHVL	TPIREQHVL
923	SPDSGVYEM(+15.99)	18.82	999.385	9	77.8	9	-6.8	500.697	2	17.8193	-3.9642	0.63	885587	Neo_sh14_patient1_HLAI_0412_HM1114_tims_Slot1-36_1_3662.d	20831	0.7839	0.7935	0.0213			1	1	0	0	Oxidation (M)	M9:Oxidation (M):1000.00	2 0 0 18 11 11 82 60 5	SPDSGVYEM(+15.99)	Q460N5|PAR14_HUMAN	DB Search	SPDSGVYEM	SPDSGVYEM
924	SLYRIATSK	42.05	1037.59	9	77.8	9	0.2	519.801	2	17.8193	-6.6422	0.75	885569	Neo_sh14_patient1_HLAI_0412_HM1114_tims_Slot1-36_1_3662.d	20813	0.8559	0.8656	0.0292			1	1	0	0			5 13 21 0 0 10 39 36 5	SLYRIATSK	Q6N075|MFSD5_HUMAN	DB Search	SLYRIATSK	SLYRIATSK
925	SVWHGTLSK	49.27	1013.53	9	100	9	-3.9	507.77	2	17.5541	-0.0161	0.9	872282	Neo_sh14_patient1_HLAI_0412_HM1114_tims_Slot1-36_1_3662.d	20378	0.8222	0.8319	0.033			1	1	0	0			3 3 64 86 9 6 2 2 5	SVWHGTLSK	Q969Z0|FAKD4_HUMAN	DB Search	SVWHGTLSK	SVWHGTLSK
926	IPISLHTSL	33.91	979.57	9	88.9	9	3.3	490.794	2	46.1776	1.0798	0.81	2279904	Neo_sh14_patient1_HLAI_0412_HM1114_tims_Slot1-36_1_3662.d	49164	0.8187	0.8284	0.0164			3	3	0	0			5 55 55 5 7 6 0 3 5	IPISLHTSL	Q5JSZ5|PRC2B_HUMAN	DB Search	IPISLHTSL	IPISLHTSL
927	TPVDDRISL	27.69	1014.53	9	55.6	9	-0.9	508.274	2	36.102	-0.7882	0.79	1781893	Neo_sh14_patient1_HLAI_0412_HM1114_tims_Slot1-36_1_3662.d	39529	0.8175	0.8272	0.0276	1760	27400	2	2	1	1			5 74 93 44 9 1 0 0 0	TPVDDRISL	Q9UHI6|DDX20_HUMAN	DB Search	TPVDDRISL	TPVDDRISL
928	LPLAHVLEL	14.64	1003.61	9	33.3	9	-1.1	502.81	2	54.2784	-2.5299	0.69	2678757	Neo_sh14_patient1_HLAI_0412_HM1114_tims_Slot1-36_1_3662.d	55113	0.8516	0.8613	0.0035			1	1	0	0			5 20 0 0 0 49 0 0 0	LPLAHVLEL	O95573|ACSL3_HUMAN:O60488|ACSL4_HUMAN	DB Search	LPLAHVLEL	LPLAHVLEL
929	RAYGPGLEK	40.03	989.529	9	77.8	9	9.1	495.776	2	12.3447	-0.8457	0.84	609195	Neo_sh14_patient1_HLAI_0412_HM1114_tims_Slot1-36_1_3662.d	12495	0.8175	0.8272	0.0376	455	5530	1	1	1	1			1 1 7 4 7 7 48 48 5	RAYGPGLEK	O75369|FLNB_HUMAN	DB Search	RAYGPGLEK	RAYGPGLEK
930	RYDDMASAM	26.37	1058.42	9	77.8	9	7.6	530.219	2	23.7682	-4.2688	0.86	1182269	Neo_sh14_patient1_HLAI_0412_HM1114_tims_Slot1-36_1_3662.d	29261	0.8245	0.8342	0.0306			1	1	0	0			0 0 2 2 41 41 60 56 5	RYDDMASAM	Q04917|1433F_HUMAN	DB Search	RYDDMASAM	RYDDMASAM
931	GLIDHQTYL	36.82	1058.54	9	77.8	9	1.9	530.278	2	39.7993	-0.1562	0.88	1964098	Neo_sh14_patient1_HLAI_0412_HM1114_tims_Slot1-36_1_3662.d	43642	0.8803	0.89	-0.0152	7070	62600	1	1	1	1			0 0 13 5 3 36 62 15 5	GLIDHQTYL	Q15149|PLEC_HUMAN	DB Search	GLIDHQTYL	GLIDHQTYL
932	RVFQDVAQK	35.53	1089.59	9	77.8	9	2.4	545.805	2	13.7376	-1.3876	0.93	681258	Neo_sh14_patient1_HLAI_0412_HM1114_tims_Slot1-36_1_3662.d	14790	0.8602	0.8699	0.025	463	6890	1	1	1	1			2 2 0 1 2 34 34 13 5	RVFQDVAQK	Q9UPQ3|AGAP1_HUMAN:Q96P47|AGAP3_HUMAN	DB Search	RVFQDVAQK	RVFQDVAQK
933	HPVSLEQYL	25.14	1084.56	9	66.7	9	2.8	543.286	2	45.8748	1.2423	0.76	2264979	Neo_sh14_patient1_HLAI_0412_HM1114_tims_Slot1-36_1_3662.d	48927	0.8431	0.8528	0.052			1	1	0	0			3 0 2 3 0 0 56 9 5	HPVSLEQYL	P48556|PSMD8_HUMAN	DB Search	HPVSLEQYL	HPVSLEQYL
934	KLNITPTKK	42.19	1041.65	9	100	9	-0.6	521.834	2	9.2892	0.0675	0.84	459109	Neo_sh14_patient1_HLAI_0412_HM1114_tims_Slot1-36_1_3662.d	7453	0.8358	0.8454	0.0394			1	1	0	0			5 67 13 13 19 2 2 13 5	KLNITPTKK	Q7KZ85|SPT6H_HUMAN	DB Search	KLNITPTKK	KLNITPTKK
935	ALSPSLKNK	36.33	956.565	9	66.7	9	2.3	479.291	2	12.2548	0.2464	0.91	605434	Neo_sh14_patient1_HLAI_0412_HM1114_tims_Slot1-36_1_3662.d	12406	0.8327	0.8423	0.0125	2270	35200	3	3	1	1			5 9 87 41 16 10 0 0 0	ALSPSLKNK	Q7Z333|SETX_HUMAN	DB Search	ALSPSLKNK	ALSPSLKNK
936	TPVDLEVKL	41.37	1012.58	9	77.8	9	6.1	507.301	2	48.1453	-0.1561	0.52	2376929	Neo_sh14_patient1_HLAI_0412_HM1114_tims_Slot1-36_1_3662.d	50717	0.8315	0.8412	0.0237			1	1	0	0			5 99 35 31 25 25 12 0 0	TPVDLEVKL	Q12770|SCAP_HUMAN	DB Search	TPVDLEVKL
937	VPITDQHIL	42.74	1034.58	9	77.8	9	2.6	518.297	2	39.0207	2.398	0.78	1926578	Neo_sh14_patient1_HLAI_0412_HM1114_tims_Slot1-36_1_3662.d	42842	0.8768	0.8865	-0.0217	2040	27400	2	2	1	1			4 4 44 10 8 8 11 0 0	VPITDQHIL	Q5D1E8|ZC12A_HUMAN	DB Search	VPITDQHIL	VPITDQHIL
938	NPVHNGHAL	39.29	957.478	9	77.8	9	3	479.748	2	8.6606	-0.2602	0.78	424959	Neo_sh14_patient1_HLAI_0412_HM1114_tims_Slot1-36_1_3662.d	6351	0.799	0.8086	0.0162	2280	27700	1	1	1	1			5 13 29 12 0 0 3 5 5	NPVHNGHAL	O95340|PAPS2_HUMAN:O43252|PAPS1_HUMAN	DB Search	NPVHNGHAL	NPVHNGHAL
939	KLSGFSFKK	38.52	1040.6	9	100	9	1.9	521.309	2	18.157	1.0428	0.89	900750	Neo_sh14_patient1_HLAI_0412_HM1114_tims_Slot1-36_1_3662.d	21306	0.8431	0.8528	0.032	227	3880	1	1	1	1			5 58 9 4 4 8 8 2 2	KLSGFSFKK	P29966|MARCS_HUMAN	DB Search	KLSGFSFKK	KLSGFSFKK
940	FLLDHGASL	35.1	971.508	9	88.9	9	4.8	486.763	2	46.6317	1.3239	0.81	2302305	Neo_sh14_patient1_HLAI_0412_HM1114_tims_Slot1-36_1_3662.d	49533	0.8195	0.8292	0.0157			1	1	0	0			5 53 18 18 0 7 10 4 4	FLLDHGASL	Q12955|ANK3_HUMAN	DB Search	FLLDHGASL	FLLDHGASL
941	LLAEKIYKI	35.89	1089.68	9	100	9	4.7	545.85	2	36.673	-1.51	0.76	1810081	Neo_sh14_patient1_HLAI_0412_HM1114_tims_Slot1-36_1_3662.d	40177	0.8827	0.8924	0.0425			2	2	0	0			5 29 12 6 6 8 2 8 5	LLAEKIYKI	Q92793|CBP_HUMAN:Q09472|EP300_HUMAN	DB Search	LLAEKIYKI	LLAEKIYKI
942	SILEHQIQV	35.89	1065.58	9	77.8	9	4.2	533.8	2	38.4164	-0.5209	0.83	1896542	Neo_sh14_patient1_HLAI_0412_HM1114_tims_Slot1-36_1_3662.d	42182	0.8602	0.8699	0.015			2	2	0	0			0 0 4 4 2 20 30 2 2	SILEHQIQV	P33991|MCM4_HUMAN	DB Search	SILEHQIQV	SILEHQIQV
943	AAVNHISQL	33.23	951.514	9	66.7	9	1.5	476.765	2	22.8206	0.2892	0.53	1134991	Neo_sh14_patient1_HLAI_0412_HM1114_tims_Slot1-36_1_3662.d	27883	0.7966	0.8063	0.0285			1	1	0	0			5 6 8 5 0 1 1 14 5	AAVNHISQL	Q5T2E6|ARMD3_HUMAN	DB Search	AAVNHISQL	AAVNHISQL
944	KLNWTGTSK	43.15	1033.56	9	100	9	-1.9	517.784	2	13.806	-1.3502	0.87	683153	Neo_sh14_patient1_HLAI_0412_HM1114_tims_Slot1-36_1_3662.d	14849	0.8265	0.8361	0.0287	1420	16700	1	1	1	1			5 65 42 21 9 3 7 17 5	KLNWTGTSK	O95433|AHSA1_HUMAN	DB Search	KLNWTGTSK	KLNWTGTSK
945	TLYEHNNEL	32.87	1131.52	9	88.9	9	2	566.768	2	21.9295	-1.3304	0.81	1087769	Neo_sh14_patient1_HLAI_0412_HM1114_tims_Slot1-36_1_3662.d	26561	0.8749	0.8846	0.0202	763	7630	1	1	1	1			5 12 4 4 0 3 10 27 5	TLYEHNNEL	Q9NRG9|AAAS_HUMAN	DB Search	TLYEHNNEL	TLYEHNNEL
946	GLARVILSK	39.13	955.618	9	100	9	0.9	478.817	2	23.7442	-1.3876	0.87	1178503	Neo_sh14_patient1_HLAI_0412_HM1114_tims_Slot1-36_1_3662.d	29167	0.8299	0.8396	0.0352	495	5860	1	1	1	1			4 4 3 2 21 48 73 57 5	GLARVILSK	Q6R327|RICTR_HUMAN	DB Search	GLARVILSK	GLARVILSK
947	TLDDKKVYL	32.68	1093.6	9	33.3	9	1.2	547.809	2	24.0714	0.1387	0.75	1197457	Neo_sh14_patient1_HLAI_0412_HM1114_tims_Slot1-36_1_3662.d	29761	0.8862	0.8959	0.029			1	1	0	0			0 0 10 10 18 0 0 0 0	TLDDKKVYL	Q567U6|CCD93_HUMAN	DB Search	TLDDKKVYL	TLDDKKVYL
948	NIIELVHQV	32.59	1063.6	9	55.6	9	-3.8	532.807	2	50.4166	-0.9212	0.89	2488730	Neo_sh14_patient1_HLAI_0412_HM1114_tims_Slot1-36_1_3662.d	52358	0.8757	0.8854	-0.0005			2	2	0	0			0 0 89 22 22 25 8 0 0	NIIELVHQV	P43405|KSYK_HUMAN	DB Search	NIIELVHQV	NIIELVHQV
949	SLMSHAIEL	25.29	999.506	9	88.9	9	12.6	500.767	2	44.8151	-0.3668	0.71	2212665	Neo_sh14_patient1_HLAI_0412_HM1114_tims_Slot1-36_1_3662.d	48021	0.8249	0.8346	0.0202			1	1	0	0			4 4 81 23 0 39 49 21 5	SLMSHAIEL	Q9Y263|PLAP_HUMAN	DB Search	SLMSHAIEL	SLMSHAIEL
950	RVDDHLMGK	53.14	1069.53	9	77.8	9	5.8	535.777	2	11.6025	0.96	0.81	575006	Neo_sh14_patient1_HLAI_0412_HM1114_tims_Slot1-36_1_3662.d	11354	0.8466	0.8563	0.0185			3	3	0	0			2 0 0 5 63 64 21 15 5	RVDDHLMGK	O95232|LC7L3_HUMAN	DB Search	RVDDHLMGK	RVDDHLMGK
951	RAIDFSPYL	38.87	1080.56	9	55.6	9	0.5	541.288	2	50.7572	-0.5806	0.92	2505470	Neo_sh14_patient1_HLAI_0412_HM1114_tims_Slot1-36_1_3662.d	52574	0.8625	0.8722	0.0227			3	3	0	0			0 0 0 0 22 22 5 5 5	RAIDFSPYL	P17676|CEBPB_HUMAN	DB Search	RAIDFSPYL	RAIDFSPYL
952	QAAPDLHVL	22.47	962.519	9	77.8	9	-1	482.266	2	39.07	0.1327	0.75	1924704	Neo_sh14_patient1_HLAI_0412_HM1114_tims_Slot1-36_1_3662.d	42804	0.8067	0.8164	0.0385	6970	59900	4	4	1	1			5 24 34 27 0 0 4 4 5	QAAPDLHVL	Q969P5|FBX32_HUMAN	DB Search	QAAPDLHVL	QAAPDLHVL
953	HPLHNDPNL	36.15	1055.51	9	66.7	9	1	528.765	2	13.4697	-0.5232	0.84	667999	Neo_sh14_patient1_HLAI_0412_HM1114_tims_Slot1-36_1_3662.d	14383	0.8342	0.8439	0.0309	22000	186000	3	3	1	1			5 0 0 0 9 11 7 7 5	HPLHNDPNL	P42285|MTREX_HUMAN	DB Search	HPLHNDPNL	HPLHNDPNL
954	FPSHFSSDL	29.51	1035.47	9	88.9	9	5.9	518.743	2	37.8859	-2.8749	0.61	1870262	Neo_sh14_patient1_HLAI_0412_HM1114_tims_Slot1-36_1_3662.d	41606	0.8179	0.8276	0.0372			2	2	0	0			5 11 4 0 4 4 16 20 5	FPSHFSSDL	P22694|KAPCB_HUMAN:P17612|KAPCA_HUMAN	DB Search	FPSHFSSDL
955	SLHSKLFRV	31.78	1085.63	9	33.3	9	0.4	543.825	2	21.8356	-1.8373	0.76	1085880	Neo_sh14_patient1_HLAI_0412_HM1114_tims_Slot1-36_1_3662.d	26508	0.8815	0.8912	0.0236	166	2830	1	1	1	1			0 0 73 33 0 2 0 0 0	SLHSKLFRV	Q32MH5|F214A_HUMAN	DB Search	SLHSKLFRV	SLHSKLFRV
956	RLSNLALVK	31.61	1012.64	9	55.6	9	1.7	507.328	2	23.6941	-0.52	0.82	1176623	Neo_sh14_patient1_HLAI_0412_HM1114_tims_Slot1-36_1_3662.d	29123	0.8613	0.871	0.0238	184	3090	1	1	1	1			0 0 0 0 50 75 97 23 5	RLSNLALVK	O14737|PDCD5_HUMAN	DB Search	RLSNLALVK	RLSNLALVK
957	QTYVGITEK	43.84	1037.54	9	88.9	9	0.4	519.777	2	20.84	-0.4054	0.93	1032979	Neo_sh14_patient1_HLAI_0412_HM1114_tims_Slot1-36_1_3662.d	25015	0.8451	0.8547	0.0301	32300	296000	2	2	1	1			5 22 61 67 9 9 4 0 5	QTYVGITEK	O75643|U520_HUMAN	DB Search	QTYVGITEK	QTYVGITEK
958	KLAEKLTIL	27.56	1027.66	9	100	9	8.7	514.844	2	37.0523	3.2857	0.57	1828911	Neo_sh14_patient1_HLAI_0412_HM1114_tims_Slot1-36_1_3662.d	40647	0.8489	0.8586	0.0362			2	2	0	0			5 14 14 14 47 16 16 24 5	KLAEKLTIL	Q9Y2A7|NCKP1_HUMAN:P55160|NCKPL_HUMAN	DB Search	KLAEKLTIL	KLAEKLTIL
959	FLHESLVEY	34.23	1135.55	9	44.4	9	3.9	568.787	2	42.2415	-2.5609	0.8	2085980	Neo_sh14_patient1_HLAI_0412_HM1114_tims_Slot1-36_1_3662.d	46184	0.8924	0.9021	0.0128			1	1	0	0			0 0 0 48 48 91 43 0 0	FLHESLVEY	Q9NW08|RPC2_HUMAN	DB Search	FLHESLVEY	FLHESLVEY
960	KVNIIPLIAK	41.45	1107.74	10	80	10	8.4	554.881	2	43.2632	0.9362	0.81	2136235	Neo_sh14_patient1_HLAI_0412_HM1114_tims_Slot1-36_1_3662.d	46867	0.8815	0.8912	0.0336	885	9390	3	3	1	1			5 13 23 23 45 9 9 23 1 1	KVNIIPLIAK	Q6ZU15|SEP14_HUMAN:Q16181|SEPT7_HUMAN	DB Search	KVNIIPLIAK	KVNIIPLIAK
961	KMLDHEYTTK	48.12	1264.61	10	80	10	-2.6	633.312	2	10.9954	-0.8956	0.79	544587	Neo_sh14_patient1_HLAI_0412_HM1114_tims_Slot1-36_1_3662.d	10311	0.9188	0.9285	0.0364			1	1	0	0			5 54 45 45 17 17 10 0 0 5	KMLDHEYTTK	P11387|TOP1_HUMAN	DB Search	KMLDHEYTTK	KMLDHEYTTK
962	SPNHLYLVM	33.68	1072.54	9	55.6	9	5.7	537.279	2	45.1935	1.6518	0.89	2231340	Neo_sh14_patient1_HLAI_0412_HM1114_tims_Slot1-36_1_3662.d	48336	0.8493	0.859	0.0158			4	4	0	0			0 0 0 0 3 51 94 8 5	SPNHLYLVM	Q8IU85|KCC1D_HUMAN	DB Search	SPNHLYLVM
963	EQRASTIAY	39.57	1037.51	9	66.7	9	4.7	519.767	2	17.7436	-3.7135	0.81	881794	Neo_sh14_patient1_HLAI_0412_HM1114_tims_Slot1-36_1_3662.d	20710	0.828	0.8377	0.0271			2	2	0	0			0 0 0 4 5 7 53 53 5	EQRASTIAY	Q53HC0|CCD92_HUMAN	DB Search	EQRASTIAY
964	RTM(+15.99)VKTLEY	29.57	1155.6	9	66.7	9	3.6	578.807	2	16.7205	-2.0013	0.63	830625	Neo_sh14_patient1_HLAI_0412_HM1114_tims_Slot1-36_1_3662.d	19113	0.88	0.8896	0.0352			1	1	0	0	Oxidation (M)	M3:Oxidation (M):1000.00	0 0 0 13 35 28 28 9 5	RTM(+15.99)VKTLEY	Q7Z3J2|VP35L_HUMAN	DB Search	RTMVKTLEY	RTMVKTLEY
965	HATFNDPVM(+15.99)	22.56	1046.45	9	66.7	9	3.9	524.234	2	21.9113	-1.4528	0.94	1089657	Neo_sh14_patient1_HLAI_0412_HM1114_tims_Slot1-36_1_3662.d	26613	0.8086	0.8183	0.0365			1	1	0	0	Oxidation (M)	M9:Oxidation (M):1000.00	0 0 0 2 12 12 9 9 5	HATFNDPVM(+15.99)	Q9UL40|ZN346_HUMAN	DB Search	HATFNDPVM	HATFNDPVM
966	KVANVELYY	16.86	1097.58	9	55.6	9	12.4	549.802	2	37.2038	-0.6676	0.68	1836436	Neo_sh14_patient1_HLAI_0412_HM1114_tims_Slot1-36_1_3662.d	40828	0.8528	0.8625	0.0423			2	2	0	0			5 6 0 0 0 0 69 76 5	KVANVELYY	Q00610|CLH1_HUMAN	DB Search	KVANVELYY	KVANVELYY
967	TTTGHLIYK	56.58	1032.56	9	100	9	0	517.287	2	14.5587	-0.6591	0.86	720998	Neo_sh14_patient1_HLAI_0412_HM1114_tims_Slot1-36_1_3662.d	15974	0.8284	0.8381	0.0468	7790	114000	3	3	1	1			5 23 41 15 15 12 19 3 3	TTTGHLIYK	Q5VTE0|EF1A3_HUMAN:Q05639|EF1A2_HUMAN:P68104|EF1A1_HUMAN	DB Search	TTTGHLIYK	TTTGHLIYK
968	RAAQVFFLK	37.45	1078.63	9	55.6	9	1.6	540.323	2	35.0821	2.0583	0.7	1731165	Neo_sh14_patient1_HLAI_0412_HM1114_tims_Slot1-36_1_3662.d	38373	0.8722	0.8819	0.023			1	1	0	0			0 0 0 0 19 48 21 13 5	RAAQVFFLK	P28562|DUS1_HUMAN	DB Search	RAAQVFFLK	RAAQVFFLK
969	RVDGRMLHY	34.47	1145.58	9	66.7	9	-11	382.862	3	18.0088	2.1842	0.27	895074	Neo_sh14_patient1_HLAI_0412_HM1114_tims_Slot1-36_1_3662.d	21138	0.703	0.7127	0.0321	1010	11200	4	4	1	1			0 0 0 13 13 36 44 13 5	RVDGRMLHY	Q86W92|LIPB1_HUMAN	DB Search	RVDGRMLHY	RVDGRMLHY
970	HLSSLQLFY	28.34	1106.58	9	55.6	9	4.7	554.298	2	52.9899	0.2024	0.81	2615015	Neo_sh14_patient1_HLAI_0412_HM1114_tims_Slot1-36_1_3662.d	53795	0.8586	0.8683	0.0465			1	1	0	0			0 0 0 0 22 53 32 7 5	HLSSLQLFY	Q9BWG6|SCNM1_HUMAN	DB Search	HLSSLQLFY	HLSSLQLFY
971	KIYLGLSK	22.43	920.569	8	50	8	-3.7	461.29	2	23.2375	0.3989	0.81	1155827	Neo_sh14_patient1_HLAI_0412_HM1114_tims_Slot1-36_1_3662.d	28523	0.8071	0.8168	0.0181			1	1	0	0			5 96 49 21 0 0 0 0	KIYLGLSK	P28370|SMCA1_HUMAN	DB Search	KIYLGLSK	KIYLGLSK
972	LQKANQEQY	20.3	1120.55	9	55.6	9	17.9	561.293	2	10.5022	-3.0896	0.75	519828	Neo_sh14_patient1_HLAI_0412_HM1114_tims_Slot1-36_1_3662.d	9420	0.8524	0.8621	0.0427			1	1	0	0			5 24 8 0 0 47 69 0 0	LQKANQEQY	Q9UBU8|MO4L1_HUMAN	DB Search	LQKANQEQY	LQKANQEQY
973	YAAGAKLVL	16.35	904.538	9	66.7	9	4.9	453.279	2	36.7108	0.311	0.45	1811936	Neo_sh14_patient1_HLAI_0412_HM1114_tims_Slot1-36_1_3662.d	40196	0.7986	0.8083	0.0166			2	2	0	0			5 28 13 0 15 9 0 0 5	YAAGAKLVL	Q6IAN0|DRS7B_HUMAN	DB Search	YAAGAKLVL	YAAGAKLVL
974	HPQPGSQAL	19.66	933.467	9	55.6	9	3.7	467.742	2	14.2964	-0.7666	0.59	709633	Neo_sh14_patient1_HLAI_0412_HM1114_tims_Slot1-36_1_3662.d	15625	0.7661	0.7757	0.0691			1	1	0	0			0 0 4 0 0 13 13 49 5	HPQPGSQAL	Q9NVF7|FBX28_HUMAN	DB Search	HPQPGSQAL
975	FAEGQGRAL	25.23	947.482	9	55.6	9	1.9	474.749	2	18.4353	-1.9804	0.92	913940	Neo_sh14_patient1_HLAI_0412_HM1114_tims_Slot1-36_1_3662.d	21644	0.7959	0.8055	0.0193	1200	13800	1	1	1	1			5 79 56 8 8 0 0 0 0	FAEGQGRAL	Q92508|PIEZ1_HUMAN	DB Search	FAEGQGRAL	FAEGQGRAL
976	FLNKEITSV	33.02	1049.58	9	77.8	9	-1.2	525.794	2	35.4616	-0.3572	0.52	1749892	Neo_sh14_patient1_HLAI_0412_HM1114_tims_Slot1-36_1_3662.d	38740	0.8722	0.8819	0.003	374	6780	3	3	1	1			0 0 2 11 18 21 21 6 5	FLNKEITSV	Q9UI10|EI2BD_HUMAN	DB Search	FLNKEITSV	FLNKEITSV
977	HPISNNNSL	31.06	994.483	9	55.6	9	4	498.251	2	13.2895	-2.1719	0.76	660416	Neo_sh14_patient1_HLAI_0412_HM1114_tims_Slot1-36_1_3662.d	14144	0.8032	0.8129	0.0419	473	10800	2	2	1	1			0 0 7 7 8 23 63 0 0	HPISNNNSL	Q8NFD5|ARI1B_HUMAN	DB Search	HPISNNNSL	HPISNNNSL
978	SVFPKPFVQK	28.91	1175.67	10	40	10	4.7	588.845	2	32.7577	-0.3162	0.69	1618586	Neo_sh14_patient1_HLAI_0412_HM1114_tims_Slot1-36_1_3662.d	35954	0.8943	0.904	0.0408			5	5	0	0			0 0 22 23 23 0 0 13 0 0	SVFPKPFVQK	Q6ZMT4|KDM7A_HUMAN	DB Search	SVFPKPFVQK	SVFPKPFVQK
979	ILLDQTVRV	24.88	1055.63	9	55.6	9	-0.4	528.824	2	45.1935	4.1177	0.93	2231339	Neo_sh14_patient1_HLAI_0412_HM1114_tims_Slot1-36_1_3662.d	48335	0.871	0.8807	0.0141			2	2	0	0			5 30 54 39 3 0 0 0 0	ILLDQTVRV	Q69YN4|VIR_HUMAN	DB Search	ILLDQTVRV	ILLDQTVRV
980	ALADGVQKV	46.09	899.508	9	77.8	9	1	450.762	2	21.0676	-3.2937	0.94	1044302	Neo_sh14_patient1_HLAI_0412_HM1114_tims_Slot1-36_1_3662.d	25322	0.7707	0.7804	0.0345	213000	1730000	6	6	1	1			5 12 38 22 3 3 3 1 1	ALADGVQKV	O14791|APOL1_HUMAN	DB Search	ALADGVQKV	ALADGVQKV
981	FPAAIEHTI	26.22	997.523	9	44.4	9	6.5	499.772	2	40.2346	3.3444	0.5	1986643	Neo_sh14_patient1_HLAI_0412_HM1114_tims_Slot1-36_1_3662.d	44155	0.8226	0.8323	0.0226			2	2	0	0			5 48 29 11 0 0 0 0 0	FPAAIEHTI	A0AVT1|UBA6_HUMAN	DB Search	FPAAIEHTI	FPAAIEHTI
982	LPDKTIASL	35.92	956.554	9	100	9	2.2	479.285	2	36.6232	-0.7576	0.66	1804425	Neo_sh14_patient1_HLAI_0412_HM1114_tims_Slot1-36_1_3662.d	40029	0.7974	0.8071	0.0377	7430	60800	3	3	1	1			5 27 12 2 2 9 9 22 5	LPDKTIASL	Q9P2K3|RCOR3_HUMAN	DB Search	LPDKTIASL	LPDKTIASL
983	ILDQKINEV	24.79	1070.6	9	66.7	9	-5.5	536.303	2	29.9568	-0.939	0.66	1480284	Neo_sh14_patient1_HLAI_0412_HM1114_tims_Slot1-36_1_3662.d	33516	0.847	0.8567	0.0482			1	1	0	0			4 4 40 40 0 8 5 1 1	ILDQKINEV	P11926|DCOR_HUMAN	DB Search	ILDQKINEV	ILDQKINEV
984	SLYDRPASYK	46.7	1198.6	10	100	10	-1.2	600.306	2	17.9662	-2.544	0.84	891273	Neo_sh14_patient1_HLAI_0412_HM1114_tims_Slot1-36_1_3662.d	21009	0.8819	0.8916	0.0533	229	3930	1	1	1	1			5 8 16 11 2 2 2 4 15 5	SLYDRPASYK	P16234|PGFRA_HUMAN	DB Search	SLYDRPASYK	SLYDRPASYK
985	RLYQAQALYK	33.9	1252.69	10	60	10	2.2	627.355	2	21.8735	-0.0267	0.85	1087754	Neo_sh14_patient1_HLAI_0412_HM1114_tims_Slot1-36_1_3662.d	26546	0.9296	0.9393	0.0455			1	1	0	0			0 0 0 0 7 16 24 48 18 5	RLYQAQALYK	Q8N4P2|TT30B_HUMAN:Q86WT1|TT30A_HUMAN	DB Search	RLYQAQALYK	RLYQAQALYK
986	IWDPDAVKI	26.5	1055.57	9	33.3	9	3.2	528.792	2	48.0318	-0.5914	0.8	2371333	Neo_sh14_patient1_HLAI_0412_HM1114_tims_Slot1-36_1_3662.d	50629	0.8447	0.8544	0.0205			1	1	0	0			5 81 86 0 0 0 0 0 0	IWDPDAVKI	Q14195|DPYL3_HUMAN	DB Search	IWDPDAVKI
987	M(+15.99)PVHAAVQM	20.59	998.468	9	55.6	9	9.3	500.246	2	21.1536	-0.6591	0.77	1051868	Neo_sh14_patient1_HLAI_0412_HM1114_tims_Slot1-36_1_3662.d	25544	0.8005	0.8102	0.0347			1	1	0	0	Oxidation (M)	M1:Oxidation (M):32.94	0 0 0 0 5 5 54 11 5	M(+15.99)PVHAAVQM	Q14527|HLTF_HUMAN	DB Search	MPVHAAVQM	MPVHAAVQM
988	KTYEVSLREK	43.92	1251.68	10	80	10	-2.9	626.847	2	14.4086	0.3849	0.76	711543	Neo_sh14_patient1_HLAI_0412_HM1114_tims_Slot1-36_1_3662.d	15699	0.9366	0.9463	0.0185	2220	33800	3	3	1	1			5 51 37 37 29 5 3 0 1 4	KTYEVSLREK	Q16531|DDB1_HUMAN	DB Search	KTYEVSLREK	KTYEVSLREK
989	LMVDHVTEV	40.6	1041.52	9	100	9	-8.2	521.761	2	35.3851	0.9447	0.78	1746156	Neo_sh14_patient1_HLAI_0412_HM1114_tims_Slot1-36_1_3662.d	38676	0.8458	0.8555	0.0193			1	1	0	0			5 23 14 14 3 23 10 6 5	LMVDHVTEV	Q9HD15|SRA1_HUMAN	DB Search	LMVDHVTEV	LMVDHVTEV
990	SLYAHGYLK	36.35	1050.55	9	77.8	9	6.4	526.286	2	20.3205	-1.0461	0.82	1010357	Neo_sh14_patient1_HLAI_0412_HM1114_tims_Slot1-36_1_3662.d	24425	0.8846	0.8943	0.0105			1	1	0	0			5 7 58 58 35 11 15 0 0	SLYAHGYLK	P98175|RBM10_HUMAN	DB Search	SLYAHGYLK	SLYAHGYLK
991	KIYHISLEY	44.51	1164.62	9	66.7	9	4.8	583.319	2	36.0672	-0.5109	0.65	1780036	Neo_sh14_patient1_HLAI_0412_HM1114_tims_Slot1-36_1_3662.d	39508	0.8939	0.9036	0.0412			2	2	0	0			0 0 0 10 37 52 19 19 5	KIYHISLEY	Q9H4Z3|CAPAM_HUMAN	DB Search	KIYHISLEY	KIYHISLEY
992	LPFPKDASL	37.03	986.544	9	55.6	9	2.3	494.28	2	43.9012	-6.1855	0.93	2166046	Neo_sh14_patient1_HLAI_0412_HM1114_tims_Slot1-36_1_3662.d	47302	0.8144	0.8241	0.0307	27800	228000	6	6	1	1			5 20 51 12 1 1 1 1 5	LPFPKDASL	Q6UWU4|CF089_HUMAN	DB Search	LPFPKDASL	LPFPKDASL
993	LPLEKVYSL	22.97	1060.62	9	66.7	9	-0.8	531.315	2	48.36	-2.6925	0.65	2384392	Neo_sh14_patient1_HLAI_0412_HM1114_tims_Slot1-36_1_3662.d	50836	0.8834	0.8931	0.0117	842	9350	2	2	1	1			5 31 95 76 0 7 7 0 0	LPLEKVYSL	Q53GT1|KLH22_HUMAN	DB Search	LPLEKVYSL	LPLEKVYSL
994	QAIENAHVL	25.96	993.524	9	44.4	9	5.3	497.772	2	24.3365	-1.9064	0.77	1210670	Neo_sh14_patient1_HLAI_0412_HM1114_tims_Slot1-36_1_3662.d	30122	0.8664	0.8761	-0.0112			1	1	0	0			0 0 13 21 16 16 0 0 0	QAIENAHVL	P48200|IREB2_HUMAN	DB Search	QAIENAHVL	QAIENAHVL
995	RLATFFPRK	41.74	1134.67	9	44.4	9	0.9	379.23	3	21.7219	-1.0328	0.82	1080210	Neo_sh14_patient1_HLAI_0412_HM1114_tims_Slot1-36_1_3662.d	26346	0.703	0.7127	0.0221	1610	11200	4	4	1	1			0 0 7 8 71 54 0 0 0	RLATFFPRK	Q9Y5P3|RAI2_HUMAN	DB Search	RLATFFPRK	RLATFFPRK
996	KLNEMSYEL	29.15	1125.54	9	66.7	9	2.7	563.778	2	36.6638	-1.2521	0.74	1808180	Neo_sh14_patient1_HLAI_0412_HM1114_tims_Slot1-36_1_3662.d	40112	0.8699	0.8796	0.0353	534	9240	1	1	1	1			0 0 0 11 24 34 31 31 5	KLNEMSYEL	Q5VU43|MYOME_HUMAN	DB Search	KLNEMSYEL	KLNEMSYEL
997	KVFAGYYTK	43.1	1075.57	9	77.8	9	4.8	538.795	2	18.5632	-0.8922	0.87	919621	Neo_sh14_patient1_HLAI_0412_HM1114_tims_Slot1-36_1_3662.d	21817	0.8788	0.8885	0.0064	2340	23600	1	1	1	1			5 33 39 26 12 12 0 0 2	KVFAGYYTK	O00469|PLOD2_HUMAN	DB Search	KVFAGYYTK	KVFAGYYTK
998	ILYDTSSKK	26.65	1053.57	9	66.7	9	-1.1	527.792	2	12.3963	-3.6121	0.89	613027	Neo_sh14_patient1_HLAI_0412_HM1114_tims_Slot1-36_1_3662.d	12655	0.8567	0.8664	0.0185	445	8550	1	1	1	1			5 24 22 14 2 2 1 0 0	ILYDTSSKK	Q8NHV4|NEDD1_HUMAN	DB Search	ILYDTSSKK	ILYDTSSKK
999	VPHGHITSL	23.01	959.519	9	55.6	9	2	480.768	2	17.2573	0.9708	0.73	857165	Neo_sh14_patient1_HLAI_0412_HM1114_tims_Slot1-36_1_3662.d	19949	0.8055	0.8152	0.0196	432	7210	1	1	1	1			5 39 22 0 0 31 18 0 0	VPHGHITSL	P41227|NAA10_HUMAN:Q9BSU3|NAA11_HUMAN	DB Search	VPHGHITSL	VPHGHITSL
1000	RLVEIQYEL	28.7	1161.64	9	66.7	9	-0.8	581.826	2	47.994	0.3875	0.9	2369463	Neo_sh14_patient1_HLAI_0412_HM1114_tims_Slot1-36_1_3662.d	50595	0.8865	0.8962	0.0386			2	2	0	0			0 0 0 5 28 44 43 21 5	RLVEIQYEL	Q14161|GIT2_HUMAN	DB Search	RLVEIQYEL	RLVEIQYEL
1001	ILKDGIHNV	38.34	1007.58	9	55.6	9	5.8	504.798	2	18.9558	-1.4599	0.85	938558	Neo_sh14_patient1_HLAI_0412_HM1114_tims_Slot1-36_1_3662.d	22394	0.8493	0.859	0.0058	2410	32300	2	2	1	1			5 41 43 17 1 1 4 0 0	ILKDGIHNV	Q07954|LRP1_HUMAN	DB Search	ILKDGIHNV	ILKDGIHNV
1002	RLTDYISKV	37.97	1093.61	9	55.6	9	6.7	547.817	2	36.0293	6.1157	0.88	1778143	Neo_sh14_patient1_HLAI_0412_HM1114_tims_Slot1-36_1_3662.d	39451	0.8862	0.8959	0.019			1	1	0	0			0 0 1 1 83 72 61 5 5	RLTDYISKV	O75915|PRAF3_HUMAN	DB Search	RLTDYISKV	RLTDYISKV
1003	HPISDHEATL	53.45	1118.54	10	100	10	-3	560.273	2	16.0769	1.7122	0.65	792819	Neo_sh14_patient1_HLAI_0412_HM1114_tims_Slot1-36_1_3662.d	18027	0.8563	0.866	0.0289	868000	5500000	8	8	2	2			5 20 20 6 6 61 79 93 24 5	HPISDHEATL	P04439|HLAA_HUMAN:P30511|HLAF_HUMAN:P13747|HLAE_HUMAN:P01889|HLAB_HUMAN:P01893|HLAH_HUMAN	DB Search	HPISDHEATL	HPISDHEATL
1004	FVDDYTVRV	29.16	1112.55	9	55.6	9	12	557.289	2	40.0831	0.1276	0.96	1979114	Neo_sh14_patient1_HLAI_0412_HM1114_tims_Slot1-36_1_3662.d	43970	0.8691	0.8788	0.0261			2	2	0	0			5 21 23 21 3 1 1 0 0	FVDDYTVRV	O00487|PSDE_HUMAN	DB Search	FVDDYTVRV	FVDDYTVRV
1005	RLAELLSGK	45.37	985.592	9	100	9	5.7	493.806	2	23.3134	-0.9007	0.87	1159608	Neo_sh14_patient1_HLAI_0412_HM1114_tims_Slot1-36_1_3662.d	28632	0.8133	0.823	0.0519			1	1	0	0			2 2 6 9 95 83 63 44 5	RLAELLSGK	O75808|CAN15_HUMAN	DB Search	RLAELLSGK	RLAELLSGK
1006	ALASTRILK	25.02	971.613	9	55.6	9	0.7	486.814	2	19.6763	-2.1072	0.94	978215	Neo_sh14_patient1_HLAI_0412_HM1114_tims_Slot1-36_1_3662.d	23495	0.8575	0.8672	0.0077			1	1	0	0			4 4 40 12 0 0 0 0 3	ALASTRILK	Q9H4G4|GAPR1_HUMAN	DB Search	ALASTRILK
1007	KLLEKVRKV	37.4	1111.74	9	88.9	9	2.2	556.881	2	11.0859	1.6382	0.92	548373	Neo_sh14_patient1_HLAI_0412_HM1114_tims_Slot1-36_1_3662.d	10425	0.8912	0.9009	0.0339	6890	118000	3	3	1	1			5 58 52 38 13 4 1 4 5	KLLEKVRKV	Q6NZI2|CAVN1_HUMAN	DB Search	KLLEKVRKV	KLLEKVRKV
1008	KVLEFVAKV	15.79	1031.64	9	88.9	9	12.8	516.833	2	33.0609	0.2383	0.4	1633566	Neo_sh14_patient1_HLAI_0412_HM1114_tims_Slot1-36_1_3662.d	36246	0.8466	0.8563	0.0385			1	1	0	0			5 0 4 4 5 31 20 5 5	KVLEFVAKV	A2A368|MAGBG_HUMAN	DB Search	KVLEFVAKV
1009	VLLTGLHAV	27.16	921.565	9	77.8	9	1.5	461.79	2	44.096	3.2001	0.84	2177241	Neo_sh14_patient1_HLAI_0412_HM1114_tims_Slot1-36_1_3662.d	47481	0.811	0.8206	0.0142			1	1	0	0			5 26 54 7 7 14 0 0 3	VLLTGLHAV	P61236|YPEL3_HUMAN:Q96QA6|YPEL2_HUMAN:O60688|YPEL1_HUMAN	DB Search	VLLTGLHAV	VLLTGLHAV
1010	LPQHFQLEL	20.03	1123.6	9	66.7	9	-0.9	562.808	2	52.4222	1.7272	0.92	2587144	Neo_sh14_patient1_HLAI_0412_HM1114_tims_Slot1-36_1_3662.d	53464	0.8792	0.8889	0.026			2	2	0	0			5 0 0 0 32 40 56 21 5	LPQHFQLEL	Q96AZ1|EFMT3_HUMAN	DB Search	LPQHFQLEL
1011	SPTEVVERL	47.15	1028.55	9	77.8	9	3.5	515.284	2	33.2502	-4.6212	0.87	1642947	Neo_sh14_patient1_HLAI_0412_HM1114_tims_Slot1-36_1_3662.d	36447	0.8141	0.8237	0.0411			1	1	0	0			5 18 49 48 27 2 2 0 0	SPTEVVERL	Q8TB72|PUM2_HUMAN	DB Search	SPTEVVERL	SPTEVVERL
1012	IINSSITTK	28.66	975.56	9	44.4	9	0.3	488.787	2	18.0215	-33.6364	0.9	895041	Neo_sh14_patient1_HLAI_0412_HM1114_tims_Slot1-36_1_3662.d	21105	0.8067	0.8164	0.0285	1490	18600	1	1	1	1			5 22 13 2 1 1 0 0 0	IINSSITTK	P49368|TCPG_HUMAN	DB Search	IINSSITTK	IINSSITTK
1013	ILHDDEVTV	41.16	1039.52	9	77.8	9	0.7	520.767	2	28.9007	-1.3055	0.9	1429985	Neo_sh14_patient1_HLAI_0412_HM1114_tims_Slot1-36_1_3662.d	32789	0.8439	0.8536	0.0113	1950	21700	6	6	1	1			0 0 2 6 7 18 42 8 5	ILHDDEVTV	P05386|RLA1_HUMAN	DB Search	ILHDDEVTV	ILHDDEVTV
1014	VLLGKVYVV	25.27	988.632	9	55.6	9	4.5	495.326	2	48.6323	0.5833	0.82	2397455	Neo_sh14_patient1_HLAI_0412_HM1114_tims_Slot1-36_1_3662.d	51047	0.8315	0.8412	0.0437	3880	41700	1	1	1	1			5 23 43 0 0 31 31 0 0	VLLGKVYVV	Q6TFL4|KLH24_HUMAN	DB Search	VLLGKVYVV	VLLGKVYVV
1015	KTFHGLLTR	33.01	1071.62	9	55.6	9	-3	536.815	2	16.6714	-0.0763	0.66	826831	Neo_sh14_patient1_HLAI_0412_HM1114_tims_Slot1-36_1_3662.d	18991	0.8703	0.88	0.0249	1040	13300	1	1	1	1			5 54 54 48 17 0 0 0 0	KTFHGLLTR	Q8IV04|TB10C_HUMAN	DB Search	KTFHGLLTR	KTFHGLLTR
1016	LPQHVAMEM	31.97	1054.49	9	44.4	9	1	528.255	2	33.326	-3.6979	0.68	1646713	Neo_sh14_patient1_HLAI_0412_HM1114_tims_Slot1-36_1_3662.d	36541	0.8307	0.8404	0.0344			1	1	0	0			5 0 0 0 32 34 0 0 5	LPQHVAMEM	O43306|ADCY6_HUMAN	DB Search	LPQHVAMEM
1017	KQLGRIMLK	22.27	1085.67	9	66.7	9	7.3	543.848	2	16.3038	0.9942	0.84	809838	Neo_sh14_patient1_HLAI_0412_HM1114_tims_Slot1-36_1_3662.d	18522	0.8862	0.8959	0.019			2	2	0	0			5 67 24 0 0 0 3 5 5	KQLGRIMLK	P62304|RUXE_HUMAN	DB Search	KQLGRIMLK	KQLGRIMLK
1018	TLLEKDYFL	29.8	1140.61	9	77.8	9	-3.8	571.308	2	52.5736	-0.2491	0.75	2594595	Neo_sh14_patient1_HLAI_0412_HM1114_tims_Slot1-36_1_3662.d	53571	0.8776	0.8873	0.0475			2	2	0	0			0 0 87 20 9 9 44 13 5	TLLEKDYFL	Q8TF05|PP4R1_HUMAN	DB Search	TLLEKDYFL	TLLEKDYFL
1019	KVGEWAIRK	19.65	1085.63	9	33.3	9	15.3	362.891	3	12.3239	-3.1678	0.06	611140	Neo_sh14_patient1_HLAI_0412_HM1114_tims_Slot1-36_1_3662.d	12604	0.7073	0.717	-0.0021			2	2	0	0			5 31 5 1 1 1 1 0 0	KVGEWAIRK	O95477|ABCA1_HUMAN	DB Search	KVGEWAIRK
1020	SVSLPSVKK	29	943.57	9	22.2	9	0.3	472.793	2	19.8277	2.1659	0.89	985767	Neo_sh14_patient1_HLAI_0412_HM1114_tims_Slot1-36_1_3662.d	23703	0.7877	0.7974	0.0374			1	1	0	0			0 0 10 10 1 1 1 0 0	SVSLPSVKK	Q9NV58|RN19A_HUMAN	DB Search	SVSLPSVKK	SVSLPSVKK
1021	QPQSHETAL	21.83	1009.48	9	77.8	9	4.4	505.751	2	11.8327	-0.9657	0.71	584491	Neo_sh14_patient1_HLAI_0412_HM1114_tims_Slot1-36_1_3662.d	11659	0.811	0.8206	0.0342	6000	65000	2	2	1	1			2 2 6 7 0 0 4 4 4	QPQSHETAL	O95271|TNKS1_HUMAN	DB Search	QPQSHETAL	QPQSHETAL
1022	HVYVGNISK	43.19	1015.54	9	77.8	9	-0.6	508.779	2	14.9298	0.376	0.8	739930	Neo_sh14_patient1_HLAI_0412_HM1114_tims_Slot1-36_1_3662.d	16546	0.8447	0.8544	0.0305	580	9770	1	1	1	1			5 55 10 15 13 13 8 0 0	HVYVGNISK	Q9Y2F5|ICE1_HUMAN	DB Search	HVYVGNISK	HVYVGNISK
1023	KLPNTVLGK	44.63	968.602	9	44.4	9	4.7	485.31	2	19.6385	0.9484	0.89	976337	Neo_sh14_patient1_HLAI_0412_HM1114_tims_Slot1-36_1_3662.d	23453	0.8114	0.821	0.0338			2	2	0	0			5 6 3 3 1 1 1 0 0	KLPNTVLGK	Q9H4M9|EHD1_HUMAN	DB Search	KLPNTVLGK	KLPNTVLGK
1024	TPDGIDLRL	34.63	998.54	9	77.8	9	-7.4	500.273	2	47.275	4.5422	0.83	2334050	Neo_sh14_patient1_HLAI_0412_HM1114_tims_Slot1-36_1_3662.d	50066	0.8222	0.8319	0.023			1	1	0	0			5 39 62 14 14 25 7 0 0	TPDGIDLRL	P50416|CPT1A_HUMAN	DB Search	TPDGIDLRL	TPDGIDLRL
1025	KVASLLHQV	40.4	993.597	9	77.8	9	-0.9	497.805	2	22.8206	0.8914	0.41	1134973	Neo_sh14_patient1_HLAI_0412_HM1114_tims_Slot1-36_1_3662.d	27865	0.8354	0.8451	0.0198			1	1	0	0			5 14 2 2 3 7 4 0 0	KVASLLHQV	Q8NFZ5|TNIP2_HUMAN	DB Search	KVASLLHQV	KVASLLHQV
1026	RTAVYSLHK	44.93	1073.6	9	44.4	9	-10.9	358.869	3	10.7296	1.0306	0.74	531284	Neo_sh14_patient1_HLAI_0412_HM1114_tims_Slot1-36_1_3662.d	9860	0.686	0.6957	0.0091			1	1	0	0			0 0 0 44 69 36 24 0 0	RTAVYSLHK	Q9NRN9|METL5_HUMAN	DB Search	RTAVYSLHK	RTAVYSLHK
1027	ILHTDVVYL	31.33	1071.6	9	55.6	9	1	536.806	2	47.0858	0.1328	0.85	2324708	Neo_sh14_patient1_HLAI_0412_HM1114_tims_Slot1-36_1_3662.d	49904	0.8637	0.8734	0.0215			1	1	0	0			0 0 0 0 4 43 78 7 5	ILHTDVVYL	Q8N5C6|SRBD1_HUMAN	DB Search	ILHTDVVYL	ILHTDVVYL
1028	KLFEKKYSVK	53.91	1268.75	10	100	10	-2	635.381	2	12.1752	-0.1259	0.85	601635	Neo_sh14_patient1_HLAI_0412_HM1114_tims_Slot1-36_1_3662.d	12279	0.9459	0.9556	0.0292	222	4750	1	1	1	1			5 10 12 8 8 6 5 4 4 5	KLFEKKYSVK	Q53T94|TAF1B_HUMAN	DB Search	KLFEKKYSVK	KLFEKKYSVK
1029	RSSSFVLPK	26.09	1019.58	9	33.3	9	-10.8	510.79	2	21.3809	0.3782	0.58	1063202	Neo_sh14_patient1_HLAI_0412_HM1114_tims_Slot1-36_1_3662.d	25862	0.8501	0.8598	0.0251			1	1	0	0			0 0 2 0 0 23 86 0 0	RSSSFVLPK	Q8WYP3|RIN2_HUMAN	DB Search	RSSSFVLPK
1030	KVNIIPIIAK	41.45	1107.74	10	80	10	8.4	554.881	2	43.2632	2.6374	0.82	2136235	Neo_sh14_patient1_HLAI_0412_HM1114_tims_Slot1-36_1_3662.d	46867	0.8815	0.8912	0.0336	885	9390	3	3	1	1			5 13 23 23 45 9 9 23 1 1	KVNIIPIIAK	Q9NVA2|SEP11_HUMAN:Q14141|SEPT6_HUMAN:Q92599|SEPT8_HUMAN	DB Search	KVNIIPIIAK	KVNIIPIIAK
1031	EPNDVFFKL	40.97	1107.56	9	77.8	9	-4	554.785	2	53.7218	-1.6664	0.42	2650502	Neo_sh14_patient1_HLAI_0412_HM1114_tims_Slot1-36_1_3662.d	54398	0.8532	0.8629	0.032	192000	3690000	5	5	1	1			5 21 25 25 0 0 23 2 2	EPNDVFFKL	P12111|CO6A3_HUMAN	DB Search	EPNDVFFKL
1032	FLHEHKIVY	47.31	1184.63	9	77.8	9	0.4	593.325	2	20.7768	2.5268	0.72	1031093	Neo_sh14_patient1_HLAI_0412_HM1114_tims_Slot1-36_1_3662.d	24965	0.9164	0.9261	0.0287	934	11200	1	1	1	1			0 0 16 4 36 36 87 23 5	FLHEHKIVY	Q16512|PKN1_HUMAN	DB Search	FLHEHKIVY	FLHEHKIVY
1033	GQKPPLTYK	38.65	1030.58	9	55.6	9	5.1	516.3	2	14.0313	-0.9374	0.83	696416	Neo_sh14_patient1_HLAI_0412_HM1114_tims_Slot1-36_1_3662.d	15260	0.871	0.8807	-0.0059			1	1	0	0			0 0 7 27 2 2 4 0 0	GQKPPLTYK	Q49AN0|CRY2_HUMAN	DB Search	GQKPPLTYK	GQKPPLTYK
1034	VVTEHLINK	38.28	1051.6	9	100	9	4.1	526.811	2	17.6678	-1.5321	0.73	878024	Neo_sh14_patient1_HLAI_0412_HM1114_tims_Slot1-36_1_3662.d	20612	0.8559	0.8656	0.0292			1	1	0	0			3 3 6 2 2 8 16 16 5	VVTEHLINK	Q13618|CUL3_HUMAN	DB Search	VVTEHLINK	VVTEHLINK
1035	KLNIRPLLR	25.88	1121.74	9	11.1	9	-2.3	561.876	2	24.5677	-0.8184	0.68	1222153	Neo_sh14_patient1_HLAI_0412_HM1114_tims_Slot1-36_1_3662.d	30589	0.8986	0.9083	0.0266	845	22000	2	2	1	1			0 0 1 1 1 1 1 1 5	KLNIRPLLR	Q15029|U5S1_HUMAN	DB Search	KLNIRPLLR	KLNIRPLLR
1036	KVRDQQLVY	29.73	1147.63	9	55.6	9	3	574.826	2	16.9478	-0.6834	0.84	842018	Neo_sh14_patient1_HLAI_0412_HM1114_tims_Slot1-36_1_3662.d	19490	0.8768	0.8865	0.0383			1	1	0	0			0 0 0 0 4 13 61 16 5	KVRDQQLVY	Q9UJX6|ANC2_HUMAN	DB Search	KVRDQQLVY	KVRDQQLVY
1037	VLPTFILEK	34.23	1058.64	9	66.7	9	1.4	530.327	2	53.2926	3.0985	0.84	2629891	Neo_sh14_patient1_HLAI_0412_HM1114_tims_Slot1-36_1_3662.d	53983	0.8555	0.8652	0.0296			1	1	0	0			5 6 86 30 24 3 0 0 0	VLPTFILEK	Q9BXB4|OSB11_HUMAN:Q9BXB5|OSB10_HUMAN	DB Search	VLPTFILEK	VLPTFILEK
1038	KIGYHLLYY	32.77	1168.63	9	22.2	9	-0.3	585.321	2	39.78	-0.7559	0.82	1964097	Neo_sh14_patient1_HLAI_0412_HM1114_tims_Slot1-36_1_3662.d	43641	0.8986	0.9083	0.0366			2	2	0	0			0 0 0 0 0 98 61 0 0	KIGYHLLYY	Q68E01|INT3_HUMAN	DB Search	KIGYHLLYY	KIGYHLLYY
1039	KIYVGLSK	34.41	906.554	8	75	8	1.2	454.285	2	18.9944	1.637	0.85	944199	Neo_sh14_patient1_HLAI_0412_HM1114_tims_Slot1-36_1_3662.d	22527	0.7997	0.8094	0.0254			1	1	0	0			5 52 14 14 3 5 0 0	KIYVGLSK	O60264|SMCA5_HUMAN	DB Search	KIYVGLSK	KIYVGLSK
1040	KAMGYFLKH	39.69	1093.57	9	77.8	9	-5.7	547.791	2	18.5394	0.5385	0.45	921557	Neo_sh14_patient1_HLAI_0412_HM1114_tims_Slot1-36_1_3662.d	21917	0.8784	0.8881	0.0168			2	2	0	0			5 14 9 9 10 10 15 0 0	KAMGYFLKH	P50851|LRBA_HUMAN	DB Search	KAMGYFLKH	KAMGYFLKH
1041	FPNKQGYVL	40.68	1064.57	9	100	9	1	533.291	2	34.8447	-1.1533	0.66	1708650	Neo_sh14_patient1_HLAI_0412_HM1114_tims_Slot1-36_1_3662.d	37890	0.8536	0.8633	0.0216	30200	59900	7	7	1	1			5 27 15 5 4 4 3 6 5	FPNKQGYVL	O43684|BUB3_HUMAN	DB Search	FPNKQGYVL	FPNKQGYVL
1042	FPAVGM(+15.99)HSL	19.96	973.469	9	44.4	9	-5.1	487.739	2	34.134	2.2808	0.9	1684225	Neo_sh14_patient1_HLAI_0412_HM1114_tims_Slot1-36_1_3662.d	37333	0.8067	0.8164	0.0285			1	1	0	0	Oxidation (M)	M6:Oxidation (M):1000.00	5 23 47 37 0 0 0 0 0	FPAVGM(+15.99)HSL	Q8NCJ5|SPRY3_HUMAN	DB Search	FPAVGMHSL	FPAVGMHSL
1043	YPNSHTHYF	38.23	1164.5	9	100	9	2	583.258	2	19.8365	-1.1359	0.62	983858	Neo_sh14_patient1_HLAI_0412_HM1114_tims_Slot1-36_1_3662.d	23630	0.8908	0.9005	0.0043	701	10900	1	1	1	1			5 42 38 5 5 8 6 9 5	YPNSHTHYF	A5YKK6|CNOT1_HUMAN	DB Search	YPNSHTHYF	YPNSHTHYF
1044	FPNALVTKL	46.58	1001.59	9	77.8	9	5.2	501.805	2	47.994	0.276	0.78	2369466	Neo_sh14_patient1_HLAI_0412_HM1114_tims_Slot1-36_1_3662.d	50598	0.8206	0.8303	0.0345			3	3	0	0			5 40 71 19 19 30 25 0 0	FPNALVTKL	Q9UK73|FEM1B_HUMAN	DB Search	FPNALVTKL	FPNALVTKL
1045	HPIKQVDVL	39.45	1047.61	9	77.8	9	5	524.814	2	23.2682	-0.7562	0.66	1153894	Neo_sh14_patient1_HLAI_0412_HM1114_tims_Slot1-36_1_3662.d	28426	0.8516	0.8613	0.0335	4390	43500	1	1	1	1			5 0 7 13 7 0 21 17 5	HPIKQVDVL	Q9H668|STN1_HUMAN	DB Search	HPIKQVDVL	HPIKQVDVL
1046	HAVGPSTAM	24.24	869.407	9	77.8	9	0.2	435.711	2	15.6441	0.3956	0.84	775820	Neo_sh14_patient1_HLAI_0412_HM1114_tims_Slot1-36_1_3662.d	17552	0.7463	0.756	0.0388	869	9820	2	2	1	1			0 0 2 2 13 13 39 15 5	HAVGPSTAM	P15884|ITF2_HUMAN	DB Search	HAVGPSTAM	HAVGPSTAM
1047	KIYPSAYIK	29.51	1081.62	9	33.3	9	7	541.82	2	23.1237	0.3131	0.53	1150122	Neo_sh14_patient1_HLAI_0412_HM1114_tims_Slot1-36_1_3662.d	28326	0.8869	0.8966	0.0182			1	1	0	0			0 0 39 0 0 33 29 0 0	KIYPSAYIK	Q13485|SMAD4_HUMAN	DB Search	KIYPSAYIK	KIYPSAYIK
1048	KLRPPGAEK	39.33	994.592	9	77.8	9	-2.1	498.302	2	6.3949	-2.4007	0.76	314723	Neo_sh14_patient1_HLAI_0412_HM1114_tims_Slot1-36_1_3662.d	2603	0.8059	0.8156	0.0492	1710	12800	4	4	1	1			5 20 18 2 0 1 7 20 5	KLRPPGAEK	P53365|ARFP2_HUMAN	DB Search	KLRPPGAEK	KLRPPGAEK
1049	SPLPQEVVM	27.71	998.511	9	66.7	9	8.3	500.267	2	48.4859	-0.8865	0.88	2393717	Neo_sh14_patient1_HLAI_0412_HM1114_tims_Slot1-36_1_3662.d	50981	0.7893	0.799	0.0359			1	1	0	0			0 0 0 4 6 42 87 26 5	SPLPQEVVM	Q9HAU8|RNPL1_HUMAN	DB Search	SPLPQEVVM	SPLPQEVVM
1050	ALDSQVPKV	32.23	955.534	9	55.6	9	-3	478.773	2	28.5568	-1.6494	0.77	1411332	Neo_sh14_patient1_HLAI_0412_HM1114_tims_Slot1-36_1_3662.d	32496	0.7912	0.8009	0.0339			2	2	0	0			0 0 18 6 6 10 6 0 0	ALDSQVPKV	Q5JSP0|FGD3_HUMAN	DB Search	ALDSQVPKV	ALDSQVPKV
1051	IAQDHRSSL	35.12	1025.53	9	66.7	9	-5.5	513.767	2	9.2892	-1.4055	0.83	459155	Neo_sh14_patient1_HLAI_0412_HM1114_tims_Slot1-36_1_3662.d	7499	0.8218	0.8315	0.0333			3	3	0	0			5 63 70 77 17 0 5 0 0	IAQDHRSSL	O15013|ARHGA_HUMAN	DB Search	IAQDHRSSL	IAQDHRSSL
1052	TLYGTSIRK	26.54	1037.59	9	33.3	9	8.7	519.805	2	15.698	-2.0251	0.94	779619	Neo_sh14_patient1_HLAI_0412_HM1114_tims_Slot1-36_1_3662.d	17679	0.8621	0.8718	0.023			1	1	0	0			0 0 55 8 5 0 0 0 0	TLYGTSIRK	Q7Z6J2|GRASP_HUMAN	DB Search	TLYGTSIRK
1053	STLPKPVQK	40.21	996.597	9	33.3	9	2.3	499.307	2	12.8632	-3.7312	0.93	635810	Neo_sh14_patient1_HLAI_0412_HM1114_tims_Slot1-36_1_3662.d	13406	0.8319	0.8416	0.0233	303	5060	2	2	1	1			1 1 18 13 13 0 0 0 0	STLPKPVQK	Q9NUL3|STAU2_HUMAN	DB Search	STLPKPVQK	STLPKPVQK
1054	SPVTQEPEL	29.8	998.492	9	66.7	9	4.5	500.256	2	34.589	-2.0783	0.74	1706775	Neo_sh14_patient1_HLAI_0412_HM1114_tims_Slot1-36_1_3662.d	37851	0.8117	0.8214	0.0034			3	3	0	0			0 0 0 2 8 33 8 8 5	SPVTQEPEL	Q7Z3K3|POGZ_HUMAN	DB Search	SPVTQEPEL	SPVTQEPEL
1055	KVYYFSKGTLK	29.54	1332.74	11	54.5	11	0.3	667.38	2	19.8733	2.6982	0.86	985743	Neo_sh14_patient1_HLAI_0412_HM1114_tims_Slot1-36_1_3662.d	23679	0.9689	0.9786	0.0263	141	2340	1	1	1	1			5 24 56 56 33 20 0 0 0 0 0	KVYYFSKGTLK	P27694|RFA1_HUMAN	DB Search	KVYYFSKGTLK	KVYYFSKGTLK
1056	HPDSHHPGL	37.9	995.457	9	77.8	9	5.2	498.739	2	7.8487	-4.8318	0.83	386964	Neo_sh14_patient1_HLAI_0412_HM1114_tims_Slot1-36_1_3662.d	5076	0.809	0.8187	0.0161			1	1	0	0			5 27 5 5 19 81 5 0 0	HPDSHHPGL	P23769|GATA2_HUMAN	DB Search	HPDSHHPGL
1057	LFDANKAEL	26.36	1019.53	9	88.9	9	7.1	510.775	2	35.726	0.2681	0.63	1763060	Neo_sh14_patient1_HLAI_0412_HM1114_tims_Slot1-36_1_3662.d	39056	0.809	0.8187	0.0561			1	1	0	0			5 50 45 21 0 6 7 5 5	LFDANKAEL	Q01082|SPTB2_HUMAN	DB Search	LFDANKAEL	LFDANKAEL
1058	RVMQDIVYK	41.21	1150.62	9	55.6	9	2.9	576.317	2	20.9643	-1.5671	0.93	1042414	Neo_sh14_patient1_HLAI_0412_HM1114_tims_Slot1-36_1_3662.d	25270	0.8865	0.8962	0.0386			1	1	0	0			0 0 0 0 5 57 57 18 5	RVMQDIVYK	Q9BSM1|PCGF1_HUMAN	DB Search	RVMQDIVYK	RVMQDIVYK
1059	VLLPYIKKV	36.82	1071.71	9	55.6	9	-0.8	536.86	2	40.3483	-0.1427	0.84	1992286	Neo_sh14_patient1_HLAI_0412_HM1114_tims_Slot1-36_1_3662.d	44290	0.8842	0.8939	0.0309			2	2	0	0			0 0 28 17 10 10 6 0 0	VLLPYIKKV	Q5TBA9|FRY_HUMAN	DB Search	VLLPYIKKV	VLLPYIKKV
1060	HLAEHSLQV	37.33	1032.54	9	77.8	9	0.5	517.275	2	19.108	0.5441	0.67	949882	Neo_sh14_patient1_HLAI_0412_HM1114_tims_Slot1-36_1_3662.d	22702	0.8423	0.852	0.0128			1	1	0	0			5 0 0 3 32 36 66 13 5	HLAEHSLQV	Q9BRL7|SC22C_HUMAN	DB Search	HLAEHSLQV	HLAEHSLQV
1061	HLADFTPRL	41.18	1068.57	9	66.7	9	6.8	535.297	2	38.6059	1.6266	0.92	1905949	Neo_sh14_patient1_HLAI_0412_HM1114_tims_Slot1-36_1_3662.d	42409	0.8811	0.8908	0.014			1	1	0	0			5 43 10 10 2 2 0 0 0	HLADFTPRL	O75165|DJC13_HUMAN	DB Search	HLADFTPRL	HLADFTPRL
1062	HPLGDIVAF	28.62	967.513	9	55.6	9	5.8	484.766	2	50.4923	-0.8811	0.79	2492457	Neo_sh14_patient1_HLAI_0412_HM1114_tims_Slot1-36_1_3662.d	52413	0.8017	0.8114	0.0435			1	1	0	0			0 0 2 0 0 31 52 27 5	HPLGDIVAF	P49327|FAS_HUMAN	DB Search	HPLGDIVAF	HPLGDIVAF
1063	HPTSSSIDL	34.47	955.461	9	77.8	9	11.3	478.743	2	22.1763	-0.2425	0.82	1102825	Neo_sh14_patient1_HLAI_0412_HM1114_tims_Slot1-36_1_3662.d	26929	0.7858	0.7955	0.0494			1	1	0	0			0 0 5 5 11 30 27 27 5	HPTSSSIDL	Q13615|MTMR3_HUMAN	DB Search	HPTSSSIDL	HPTSSSIDL
1064	HPHFLTHKL	31.28	1128.62	9	66.7	9	-10.4	565.311	2	14.0313	3.5714	0.66	696414	Neo_sh14_patient1_HLAI_0412_HM1114_tims_Slot1-36_1_3662.d	15258	0.8687	0.8784	0.0364			1	1	0	0			5 75 41 14 0 2 10 0 0	HPHFLTHKL	O00159|MYO1C_HUMAN	DB Search	HPHFLTHKL	HPHFLTHKL
1065	AVYTKMMTKK	53.39	1199.64	10	80	10	0.1	600.828	2	12.3619	2.6629	0.86	613058	Neo_sh14_patient1_HLAI_0412_HM1114_tims_Slot1-36_1_3662.d	12686	0.9203	0.93	0.0248	1040	18300	2	2	1	1			5 26 96 58 37 19 2 2 0 0	AVYTKMMTKK	P11413|G6PD_HUMAN	DB Search	AVYTKMMTKK	AVYTKMMTKK
1066	RPNSIDPAL	29.75	981.524	9	66.7	9	0.3	491.77	2	24.4825	-1.4539	0.92	1218281	Neo_sh14_patient1_HLAI_0412_HM1114_tims_Slot1-36_1_3662.d	30389	0.8063	0.816	0.0288	2880	41700	2	2	1	1			0 0 0 2 7 7 5 5 5	RPNSIDPAL	P55072|TERA_HUMAN	DB Search	RPNSIDPAL	RPNSIDPAL
1067	SLLDKIIGA	28.88	928.559	9	55.6	9	-4.3	465.285	2	54.1647	-0.5278	0.85	2673103	Neo_sh14_patient1_HLAI_0412_HM1114_tims_Slot1-36_1_3662.d	54967	0.7978	0.8075	0.0274			1	1	0	0			1 1 48 14 5 9 2 1 1	SLLDKIIGA	Q6NZI2|CAVN1_HUMAN	DB Search	SLLDKIIGA	SLLDKIIGA
1068	AVHLKTLLK	37.42	1021.66	9	55.6	9	2.1	511.841	2	20.3963	-0.1452	0.66	1014119	Neo_sh14_patient1_HLAI_0412_HM1114_tims_Slot1-36_1_3662.d	24515	0.8602	0.8699	0.025			1	1	0	0			0 0 69 69 32 43 21 0 0	AVHLKTLLK	Q12796|PNRC1_HUMAN	DB Search	AVHLKTLLK	AVHLKTLLK
1069	KLGSVPVTV	32.14	898.549	9	44.4	9	2.1	450.283	2	35.8357	1.4901	0.88	1768718	Neo_sh14_patient1_HLAI_0412_HM1114_tims_Slot1-36_1_3662.d	39206	0.7521	0.7618	0.063	3850	44500	4	4	1	1			0 0 0 0 1 14 14 30 5	KLGSVPVTV	Q9Y4C2|TCAF1_HUMAN	DB Search	KLGSVPVTV	KLGSVPVTV
1070	RLDETIQAI	36.63	1057.58	9	66.7	9	-3.3	529.794	2	36.7169	-0.2178	0.86	1810073	Neo_sh14_patient1_HLAI_0412_HM1114_tims_Slot1-36_1_3662.d	40169	0.8458	0.8555	0.0293	374	5540	1	1	1	1			0 0 1 9 16 74 71 20 5	RLDETIQAI	Q15650|TRIP4_HUMAN	DB Search	RLDETIQAI	RLDETIQAI
1071	SLLENLEKI	33.29	1057.6	9	44.4	9	-2.3	529.807	2	53.8613	-0.8648	0.88	2658012	Neo_sh14_patient1_HLAI_0412_HM1114_tims_Slot1-36_1_3662.d	54564	0.8385	0.8482	0.0467			1	1	0	0			0 0 91 37 12 5 1 0 0	SLLENLEKI	O60812|HNRC1_HUMAN:P07910|HNRPC_HUMAN:B2RXH8|HNRC2_HUMAN:B7ZW38|HNRC3_HUMAN:P0DMR1|HNRC4_HUMAN	DB Search	SLLENLEKI	SLLENLEKI
1072	RPITDSPVL	34.85	996.56	9	33.3	9	-3.9	499.286	2	32.5905	-1.0781	0.89	1607346	Neo_sh14_patient1_HLAI_0412_HM1114_tims_Slot1-36_1_3662.d	35730	0.8044	0.8141	0.0408	6050	38400	5	5	1	1			0 0 0 0 3 22 1 1 5	RPITDSPVL	Q9NZL9|MAT2B_HUMAN	DB Search	RPITDSPVL	RPITDSPVL
1073	LSADRGLVL	21.89	942.55	9	55.6	9	1.9	472.283	2	44.6637	4.8413	0.76	2205213	Neo_sh14_patient1_HLAI_0412_HM1114_tims_Slot1-36_1_3662.d	47913	0.7854	0.7951	0.0498			2	2	0	0			5 0 0 1 0 4 35 20 5	LSADRGLVL	P24071|FCAR_HUMAN	DB Search	LSADRGLVL
1074	RLLTSLRAK	24.25	1056.68	9	22.2	9	-3.9	353.231	3	14.7134	0.9978	0.69	730501	Neo_sh14_patient1_HLAI_0412_HM1114_tims_Slot1-36_1_3662.d	16297	0.6864	0.6961	0.0187			1	1	0	0			0 0 0 50 29 0 0 0 0	RLLTSLRAK	P49368|TCPG_HUMAN	DB Search	RLLTSLRAK	RLLTSLRAK
1075	KVTEKVVVK	19.31	1028.66	9	77.8	9	5.2	515.34	2	8.4553	-0.2903	0.8	417358	Neo_sh14_patient1_HLAI_0412_HM1114_tims_Slot1-36_1_3662.d	6094	0.8416	0.8513	0.0336			1	1	0	0			5 66 0 0 2 2 28 20 5	KVTEKVVVK	Q9Y520|PRC2C_HUMAN	DB Search	KVTEKVVVK	KVTEKVVVK
1076	SPVGVNHRL	41.64	977.541	9	66.7	9	6	489.781	2	14.3256	-1.2568	0.96	711515	Neo_sh14_patient1_HLAI_0412_HM1114_tims_Slot1-36_1_3662.d	15671	0.8392	0.8489	-0.0041	1470	25400	2	2	1	1			3 3 56 7 7 6 1 0 0	SPVGVNHRL	Q99595|TI17A_HUMAN	DB Search	SPVGVNHRL	SPVGVNHRL
1077	ALSPHNILL	19.63	976.571	9	22.2	9	3.9	489.294	2	45.3827	0.8783	0.7	2240675	Neo_sh14_patient1_HLAI_0412_HM1114_tims_Slot1-36_1_3662.d	48491	0.8423	0.852	0.0028			1	1	0	0			0 0 0 0 0 30 40 0 0	ALSPHNILL	Q8TEA7|TBCK_HUMAN	DB Search	ALSPHNILL	ALSPHNILL
1078	TPQFPDM(+15.99)IL	29.08	1076.52	9	66.7	9	2.7	539.269	2	54.3543	-3.8642	0.89	2682514	Neo_sh14_patient1_HLAI_0412_HM1114_tims_Slot1-36_1_3662.d	55198	0.8404	0.8501	0.0247			3	3	0	0	Oxidation (M)	M7:Oxidation (M):1000.00	0 0 0 9 5 5 88 7 5	TPQFPDM(+15.99)IL	P63244|RACK1_HUMAN	DB Search	TPQFPDMIL	TPQFPDMIL
1079	TLSQAIVKV	31.98	957.586	9	44.4	9	3.3	479.802	2	36.2943	-1.1312	0.86	1791262	Neo_sh14_patient1_HLAI_0412_HM1114_tims_Slot1-36_1_3662.d	39718	0.7993	0.809	0.0358			3	3	0	0			5 19 10 10 0 0 0 0 0	TLSQAIVKV	O15042|SR140_HUMAN	DB Search	TLSQAIVKV	TLSQAIVKV
1080	TATATNHVL	35.19	926.482	9	66.7	9	3.3	464.25	2	15.9957	1.0904	0.89	790939	Neo_sh14_patient1_HLAI_0412_HM1114_tims_Slot1-36_1_3662.d	17983	0.7815	0.7912	0.0236	111000	1180000	6	6	1	1			5 20 66 39 5 5 0 1 1	TATATNHVL	P46063|RECQ1_HUMAN	DB Search	TATATNHVL	TATATNHVL
1081	RLYTKFSAR	50.92	1140.64	9	44.4	9	3.8	381.222	3	13.6519	1.7903	0.84	677482	Neo_sh14_patient1_HLAI_0412_HM1114_tims_Slot1-36_1_3662.d	14686	0.7398	0.7494	0.0054			1	1	0	0			0 0 4 24 23 23 1 0 0	RLYTKFSAR	Q9UJ83|HACL1_HUMAN	DB Search	RLYTKFSAR	RLYTKFSAR
1082	HPTGKM(+15.99)FIL	10.34	1058.56	9	22.2	9	7	530.29	2	24.1472	-0.1156	0.57	1201231	Neo_sh14_patient1_HLAI_0412_HM1114_tims_Slot1-36_1_3662.d	29863	0.8427	0.8524	0.0424			1	1	0	0	Oxidation (M)	M6:Oxidation (M):1000.00	5 16 0 0 0 0 0 0 0	HPTGKM(+15.99)FIL	P35244|RFA3_HUMAN	DB Search	HPTGKMFIL	HPTGKMFIL
1083	HLKDDMEAY	22.98	1120.49	9	66.7	9	4	561.252	2	17.6678	-2.2349	0.78	878023	Neo_sh14_patient1_HLAI_0412_HM1114_tims_Slot1-36_1_3662.d	20611	0.8877	0.8974	0.0174			1	1	0	0			5 0 0 0 5 33 33 37 5	HLKDDMEAY	Q9BYX2|TBD2A_HUMAN	DB Search	HLKDDMEAY
1084	VLQRSLVTV	25.93	1013.62	9	88.9	9	-4.9	507.816	2	34.4373	-1.0206	0.77	1699270	Neo_sh14_patient1_HLAI_0412_HM1114_tims_Slot1-36_1_3662.d	37690	0.8493	0.859	0.0258			1	1	0	0			5 19 0 2 13 34 61 34 5	VLQRSLVTV	O60645|EXOC3_HUMAN	DB Search	VLQRSLVTV	VLQRSLVTV
1085	VVYQYWNTK	43.41	1199.6	9	77.8	9	0.3	600.806	2	31.5466	-3.6836	0.59	1558732	Neo_sh14_patient1_HLAI_0412_HM1114_tims_Slot1-36_1_3662.d	34852	0.8865	0.8962	0.0486			1	1	0	0			5 12 89 72 54 6 5 0 0	VVYQYWNTK	Q8N766|EMC1_HUMAN	DB Search	VVYQYWNTK	VVYQYWNTK
1086	LFEGYIETL	19.92	1083.55	9	33.3	9	-5	542.779	2	40.0074	-21.9656	0.66	1975372	Neo_sh14_patient1_HLAI_0412_HM1114_tims_Slot1-36_1_3662.d	43900	0.8668	0.8765	0.0084			1	1	0	0			0 0 12 0 4 29 0 0 0	LFEGYIETL	Q14533|KRT81_HUMAN:O43790|KRT86_HUMAN	DB Search	LFEGYIETL
1087	ALHHAVIFL	23.77	1019.59	9	11.1	9	-0.3	510.803	2	39.9315	2.1938	0.39	1971628	Neo_sh14_patient1_HLAI_0412_HM1114_tims_Slot1-36_1_3662.d	43828	0.8513	0.861	0.0139			1	1	0	0			0 0 0 38 0 0 0 0 0	ALHHAVIFL	Q7Z2K6|ERMP1_HUMAN	DB Search	ALHHAVIFL	ALHHAVIFL
1088	TSAAIYHVL	36.94	973.523	9	77.8	9	3	487.77	2	38.4164	-0.122	0.72	1896536	Neo_sh14_patient1_HLAI_0412_HM1114_tims_Slot1-36_1_3662.d	42176	0.7978	0.8075	0.0374			2	2	0	0			5 56 69 22 22 19 6 0 0	TSAAIYHVL	P46977|STT3A_HUMAN	DB Search	TSAAIYHVL	TSAAIYHVL
1089	KLYEKKLLKL	36.37	1274.83	10	80	10	4.3	638.426	2	21.7219	0.3251	0.56	1080199	Neo_sh14_patient1_HLAI_0412_HM1114_tims_Slot1-36_1_3662.d	26335	0.958	0.9677	0.0472			1	1	0	0			2 2 9 8 14 7 8 32 0 0	KLYEKKLLKL	P42166|LAP2A_HUMAN:P42167|LAP2B_HUMAN	DB Search	KLYEKKLLKL	KLYEKKLLKL
1090	ATDKSFVEK	53.99	1023.52	9	100	9	0.8	512.77	2	9.3886	-1.9967	0.77	462906	Neo_sh14_patient1_HLAI_0412_HM1114_tims_Slot1-36_1_3662.d	7578	0.8365	0.8462	0.0286	17800	225000	2	2	1	1			5 65 58 58 17 13 25 8 5	ATDKSFVEK	P35579|MYH9_HUMAN:P35749|MYH11_HUMAN:Q7Z406|MYH14_HUMAN	DB Search	ATDKSFVEK	ATDKSFVEK
1091	TLTGKTITL	26.63	946.57	9	66.7	9	-1.2	474.292	2	35.12	1.4513	0.65	1733054	Neo_sh14_patient1_HLAI_0412_HM1114_tims_Slot1-36_1_3662.d	38426	0.8094	0.8191	0.0257			1	1	0	0			0 0 41 27 0 58 50 15 5	TLTGKTITL	P0CG48|UBC_HUMAN:P62979|RS27A_HUMAN:P0CG47|UBB_HUMAN:P62987|RL40_HUMAN	DB Search	TLTGKTITL	TLTGKTITL
1092	IMKLDIEQY	25.72	1151.59	9	55.6	9	-0.2	576.802	2	45.2693	-3.2825	0.44	2235080	Neo_sh14_patient1_HLAI_0412_HM1114_tims_Slot1-36_1_3662.d	48404	0.8765	0.8862	0.0387			1	1	0	0			0 0 0 0 5 6 13 10 5	IMKLDIEQY	P43304|GPDM_HUMAN	DB Search	IMKLDIEQY	IMKLDIEQY
1093	FPWEKPTTL	27.18	1117.58	9	55.6	9	-4.1	559.795	2	47.0858	-2.0727	0.57	2324719	Neo_sh14_patient1_HLAI_0412_HM1114_tims_Slot1-36_1_3662.d	49915	0.8555	0.8652	0.0296			1	1	0	0			5 76 40 0 0 2 2 0 0	FPWEKPTTL	Q86TB3|ALPK2_HUMAN	DB Search	FPWEKPTTL
1094	FLLEKGYEV	21.13	1096.58	9	44.4	9	0.7	549.298	2	44.9286	-2.2387	0.74	2218261	Neo_sh14_patient1_HLAI_0412_HM1114_tims_Slot1-36_1_3662.d	48109	0.8722	0.8819	0.033			2	2	0	0			5 53 43 43 0 0 0 0 0	FLLEKGYEV	O60547|GMDS_HUMAN	DB Search	FLLEKGYEV	FLLEKGYEV
1095	IAAPFTSKL	35.92	946.549	9	77.8	9	6.8	474.285	2	41.3705	-0.196	0.86	2042867	Neo_sh14_patient1_HLAI_0412_HM1114_tims_Slot1-36_1_3662.d	45299	0.7908	0.8005	0.0343			1	1	0	0			5 62 82 34 25 8 5 0 0	IAAPFTSKL	Q9HD20|AT131_HUMAN	DB Search	IAAPFTSKL	IAAPFTSKL
1096	MPFEEFEKL	30.28	1168.55	9	77.8	9	4.5	585.284	2	53.6336	-0.0649	0.59	2646737	Neo_sh14_patient1_HLAI_0412_HM1114_tims_Slot1-36_1_3662.d	54305	0.8703	0.88	0.0449			1	1	0	0			5 47 21 21 5 11 3 0 0	MPFEEFEKL	O15229|KMO_HUMAN	DB Search	MPFEEFEKL
1097	FPHSMEPQL	31.41	1084.5	9	66.7	9	7.2	543.262	2	38.2268	-1.6399	0.88	1887169	Neo_sh14_patient1_HLAI_0412_HM1114_tims_Slot1-36_1_3662.d	41989	0.8381	0.8478	0.0271			3	3	0	0			1 0 0 9 10 18 3 3 5	FPHSMEPQL	Q9UKD2|MRT4_HUMAN	DB Search	FPHSMEPQL	FPHSMEPQL
1098	FPSSEIQRL	32.8	1075.57	9	77.8	9	-8.8	538.786	2	36.8245	-6.3135	0.84	1817598	Neo_sh14_patient1_HLAI_0412_HM1114_tims_Slot1-36_1_3662.d	40350	0.8567	0.8664	0.0185			4	4	0	0			5 60 42 16 10 6 4 0 0	FPSSEIQRL	Q2TAC2|CCD57_HUMAN	DB Search	FPSSEIQRL
1099	HTFGGPLLK	44.04	968.544	9	77.8	9	-1.9	485.279	2	24.049	0.7204	0.8	1193643	Neo_sh14_patient1_HLAI_0412_HM1114_tims_Slot1-36_1_3662.d	29619	0.8156	0.8253	0.0395	807	9340	1	1	1	1			5 57 28 9 9 0 0 15 5	HTFGGPLLK	Q96PM9|Z385A_HUMAN	DB Search	HTFGGPLLK	HTFGGPLLK
1100	ALAPPAQQK	26.39	922.524	9	22.2	9	-4	462.267	2	13.5002	0.9659	0.83	669889	Neo_sh14_patient1_HLAI_0412_HM1114_tims_Slot1-36_1_3662.d	14437	0.7699	0.7796	0.0452			1	1	0	0			0 0 30 47 1 1 0 0 0	ALAPPAQQK	P12755|SKI_HUMAN	DB Search	ALAPPAQQK	ALAPPAQQK
1101	HPLSNPAEL	30.16	976.498	9	44.4	9	4.2	489.258	2	24.5262	-2.9211	0.82	1220197	Neo_sh14_patient1_HLAI_0412_HM1114_tims_Slot1-36_1_3662.d	30469	0.7993	0.809	0.0458			1	1	0	0			0 0 0 0 1 8 8 7 5	HPLSNPAEL	Q13907|IDI1_HUMAN	DB Search	HPLSNPAEL	HPLSNPAEL
1102	SMFTAILKK	34.4	1037.59	9	44.4	9	4	519.807	2	38.0375	-1.5191	0.82	1877778	Neo_sh14_patient1_HLAI_0412_HM1114_tims_Slot1-36_1_3662.d	41778	0.8431	0.8528	0.042			1	1	0	0			1 1 38 16 8 8 0 0 0	SMFTAILKK	P50851|LRBA_HUMAN	DB Search	SMFTAILKK	SMFTAILKK
1103	TLYDGTRQK	39.9	1080.56	9	55.6	9	1.5	541.286	2	9.4778	-2.7356	0.93	466733	Neo_sh14_patient1_HLAI_0412_HM1114_tims_Slot1-36_1_3662.d	7733	0.866	0.8757	0.0292	1880	36400	1	1	1	1			5 6 45 26 3 0 0 0 0	TLYDGTRQK	Q8N4S0|CCD82_HUMAN	DB Search	TLYDGTRQK	TLYDGTRQK
1104	LPEENYQVL	36.39	1103.55	9	66.7	9	4.2	552.785	2	45.8748	-2.5697	0.83	2264978	Neo_sh14_patient1_HLAI_0412_HM1114_tims_Slot1-36_1_3662.d	48926	0.8648	0.8745	0.0203	7190	61900	4	4	1	1			0 0 0 2 17 85 67 11 5	LPEENYQVL	Q07960|RHG01_HUMAN	DB Search	LPEENYQVL	LPEENYQVL
1105	LPTEAEFQL	25.17	1046.53	9	66.7	9	-2.3	524.27	2	53.9751	-2.4806	0.92	2663673	Neo_sh14_patient1_HLAI_0412_HM1114_tims_Slot1-36_1_3662.d	54717	0.8241	0.8338	0.031			1	1	0	0			0 0 0 3 9 23 43 6 5	LPTEAEFQL	Q5VWP2|TET5C_HUMAN	DB Search	LPTEAEFQL	LPTEAEFQL
1106	SLYYSQVRK	26.35	1142.61	9	33.3	9	3.3	572.313	2	16.2281	0.4034	0.93	806051	Neo_sh14_patient1_HLAI_0412_HM1114_tims_Slot1-36_1_3662.d	18407	0.9025	0.9122	0.0227			1	1	0	0			0 0 81 67 8 0 0 0 0	SLYYSQVRK	Q5TBA9|FRY_HUMAN	DB Search	SLYYSQVRK	SLYYSQVRK
1107	FPYVRDFVM	30.71	1172.57	9	77.8	9	0.3	587.292	2	54.0509	-1.5984	0.65	2667427	Neo_sh14_patient1_HLAI_0412_HM1114_tims_Slot1-36_1_3662.d	54799	0.8815	0.8912	0.0336			1	1	0	0			5 73 38 6 0 0 14 14 5	FPYVRDFVM	P12111|CO6A3_HUMAN	DB Search	FPYVRDFVM
1108	HLLKKTLQK	38.6	1107.71	9	66.7	9	1.6	554.865	2	7.2798	-5.0796	0.79	358513	Neo_sh14_patient1_HLAI_0412_HM1114_tims_Slot1-36_1_3662.d	4165	0.8943	0.904	0.0308			1	1	0	0			5 42 33 18 6 6 0 1 1	HLLKKTLQK	Q5SSJ5|HP1B3_HUMAN	DB Search	HLLKKTLQK	HLLKKTLQK
1109	GLIDKVNEL	26.62	999.56	9	33.3	9	0.4	500.788	2	42.6199	-0.8324	0.65	2104580	Neo_sh14_patient1_HLAI_0412_HM1114_tims_Slot1-36_1_3662.d	46424	0.8083	0.8179	0.0469			3	3	0	0			0 0 55 79 20 0 0 0 0	GLIDKVNEL	P61011|SRP54_HUMAN	DB Search	GLIDKVNEL	GLIDKVNEL
1110	HAGPTAHEL	43.18	931.451	9	66.7	9	-0.3	466.733	2	10.4766	-0.7538	0.81	516013	Neo_sh14_patient1_HLAI_0412_HM1114_tims_Slot1-36_1_3662.d	9277	0.7846	0.7943	0.0305	1680	21800	1	1	1	1			5 51 11 3 0 26 37 0 0	HAGPTAHEL	Q8WUH2|TGFA1_HUMAN	DB Search	HAGPTAHEL	HAGPTAHEL
1111	RFDEARARF	32.73	1166.59	9	55.6	9	8.8	389.876	3	17.4025	2.3083	0.6	864720	Neo_sh14_patient1_HLAI_0412_HM1114_tims_Slot1-36_1_3662.d	20160	0.7197	0.7293	0.0155			2	2	0	0			5 16 18 54 19 0 1 0 0	RFDEARARF	P24723|KPCL_HUMAN	DB Search	RFDEARARF	RFDEARARF
1112	RIGNFIVKK	43.79	1073.67	9	55.6	9	4	358.899	3	16.6069	-0.4465	0.8	824934	Neo_sh14_patient1_HLAI_0412_HM1114_tims_Slot1-36_1_3662.d	18930	0.6714	0.681	0.0338			2	2	0	0			0 0 6 11 81 25 20 0 0	RIGNFIVKK	Q00796|DHSO_HUMAN	DB Search	RIGNFIVKK	RIGNFIVKK
1113	RLMSALTQV	30.93	1017.56	9	55.6	9	0.9	509.79	2	37.6587	0.2778	0.8	1858994	Neo_sh14_patient1_HLAI_0412_HM1114_tims_Slot1-36_1_3662.d	41354	0.8377	0.8474	0.0275			2	2	0	0			0 0 0 0 12 93 75 23 5	RLMSALTQV	Q9UJF2|NGAP_HUMAN	DB Search	RLMSALTQV	RLMSALTQV
1114	KTFKTGSILK	32.28	1121.68	10	70	10	-1.9	561.847	2	14.5998	0.2038	0.78	724786	Neo_sh14_patient1_HLAI_0412_HM1114_tims_Slot1-36_1_3662.d	16090	0.8908	0.9005	0.0243			1	1	0	0			5 47 22 22 0 0 0 19 24 5	KTFKTGSILK	Q66K89|E4F1_HUMAN	DB Search	KTFKTGSILK	KTFKTGSILK
1115	VIWSHAIQK	23.44	1080.61	9	55.6	9	4.6	541.314	2	22.6689	2.0962	0.89	1127414	Neo_sh14_patient1_HLAI_0412_HM1114_tims_Slot1-36_1_3662.d	27650	0.8761	0.8858	0.0291			1	1	0	0			5 11 44 26 15 0 0 0 0	VIWSHAIQK	Q9H981|ARP8_HUMAN	DB Search	VIWSHAIQK	VIWSHAIQK
1116	GLAPSIRTK	30	941.566	9	33.3	9	1.5	471.791	2	17.0236	-4.2825	0.89	845796	Neo_sh14_patient1_HLAI_0412_HM1114_tims_Slot1-36_1_3662.d	19596	0.8191	0.8288	0.0161			1	1	0	0			0 0 26 37 4 0 0 0 0	GLAPSIRTK	P24821|TENA_HUMAN	DB Search	GLAPSIRTK	GLAPSIRTK
1117	HPDTHHPGL	35.03	1009.47	9	77.8	9	5.4	505.746	2	9.5167	-1.3332	0.63	470523	Neo_sh14_patient1_HLAI_0412_HM1114_tims_Slot1-36_1_3662.d	7851	0.8175	0.8272	0.0076			2	2	0	0			5 3 3 13 35 76 0 0 5	HPDTHHPGL	P23771|GATA3_HUMAN	DB Search	HPDTHHPGL
1118	FPQDRVFML	31.36	1151.58	9	88.9	9	3.8	576.799	2	53.7474	2.054	0.67	2652378	Neo_sh14_patient1_HLAI_0412_HM1114_tims_Slot1-36_1_3662.d	54438	0.899	0.9087	0.0062			1	1	0	0			5 91 48 6 0 8 27 8 5	FPQDRVFML	Q9NR09|BIRC6_HUMAN	DB Search	FPQDRVFML
1119	VLWGETVHL	36.52	1052.57	9	55.6	9	5.5	527.293	2	52.3466	0.0869	0.92	2583435	Neo_sh14_patient1_HLAI_0412_HM1114_tims_Slot1-36_1_3662.d	53427	0.8621	0.8718	0.013			1	1	0	0			0 0 96 17 9 8 8 0 0	VLWGETVHL	P41279|M3K8_HUMAN	DB Search	VLWGETVHL	VLWGETVHL
1120	KTQPTSLPK	29.13	998.576	9	77.8	9	6.7	500.299	2	10.1988	-0.3392	0.71	504643	Neo_sh14_patient1_HLAI_0412_HM1114_tims_Slot1-36_1_3662.d	8923	0.8195	0.8292	0.0357			1	1	0	0			5 9 9 2 0 0 4 7 5	KTQPTSLPK	P27816|MAP4_HUMAN	DB Search	KTQPTSLPK
1121	SLM(+15.99)DHTIPEV	31.03	1156.54	10	40	10	11.7	579.286	2	36.3321	1.2853	0.88	1793153	Neo_sh14_patient1_HLAI_0412_HM1114_tims_Slot1-36_1_3662.d	39773	0.8846	0.8943	0.0105			1	1	0	0	Oxidation (M)	M3:Oxidation (M):1000.00	0 0 10 0 0 19 92 0 0 5	SLM(+15.99)DHTIPEV	O00560|SDCB1_HUMAN	DB Search	SLMDHTIPEV	SLMDHTIPEV
1122	APLDSIHSL	30.43	951.503	9	55.6	9	-0.3	476.758	2	38.8705	-1.5308	0.82	1917198	Neo_sh14_patient1_HLAI_0412_HM1114_tims_Slot1-36_1_3662.d	42642	0.8175	0.8272	0.0076	371	6140	2	2	1	1			5 37 75 8 0 0 3 0 0	APLDSIHSL	P49327|FAS_HUMAN	DB Search	APLDSIHSL	APLDSIHSL
1123	MPVFPDFKM	10.46	1110.52	9	44.4	9	4.5	556.272	2	54.3543	-3.2872	0.77	2682535	Neo_sh14_patient1_HLAI_0412_HM1114_tims_Slot1-36_1_3662.d	55219	0.8493	0.859	0.0358			1	1	0	0			5 40 40 70 0 0 0 0 0	MPVFPDFKM	Q8N7H5|PAF1_HUMAN	DB Search	MPVFPDFKM	MPVFPDFKM
1124	TPIVERHVL	44.1	1062.62	9	66.7	9	-0.5	532.316	2	22.935	-0.1344	0.87	1138759	Neo_sh14_patient1_HLAI_0412_HM1114_tims_Slot1-36_1_3662.d	27979	0.854	0.8637	0.0312	912	15800	2	2	1	1			5 41 72 36 7 0 7 1 1	TPIVERHVL	Q8N8Z6|DCBD1_HUMAN	DB Search	TPIVERHVL	TPIVERHVL
1125	HPTSDKSVL	24.72	982.508	9	55.6	9	2.2	492.263	2	10.6886	-0.4656	0.67	531278	Neo_sh14_patient1_HLAI_0412_HM1114_tims_Slot1-36_1_3662.d	9854	0.8148	0.8245	0.0403	226	3560	1	1	1	1			5 14 14 0 0 7 11 0 0	HPTSDKSVL	Q8NF91|SYNE1_HUMAN	DB Search	HPTSDKSVL
1126	TFDLQRIGF	45.16	1095.57	9	66.7	9	3.1	548.795	2	53.9751	1.1524	0.93	2663658	Neo_sh14_patient1_HLAI_0412_HM1114_tims_Slot1-36_1_3662.d	54702	0.8586	0.8683	0.0265			1	1	0	0			5 9 29 25 5 0 2 1 1	TFDLQRIGF	Q13454|TUSC3_HUMAN	DB Search	TFDLQRIGF	TFDLQRIGF
1127	IPSHVIQKL	34.71	1033.63	9	77.8	9	3.7	517.823	2	23.6078	-1.0064	0.6	1174720	Neo_sh14_patient1_HLAI_0412_HM1114_tims_Slot1-36_1_3662.d	29056	0.8447	0.8544	0.0405	199	3500	1	1	1	1			5 38 16 16 7 24 12 0 0	IPSHVIQKL	Q9UNA4|POLI_HUMAN	DB Search	IPSHVIQKL	IPSHVIQKL
1128	ALKTGIVAK	43.54	899.58	9	100	9	1.4	450.798	2	13.5066	2.0418	0.91	668000	Neo_sh14_patient1_HLAI_0412_HM1114_tims_Slot1-36_1_3662.d	14384	0.8102	0.8199	0.015	22800	305000	2	2	1	1			5 8 92 23 8 17 14 10 5	ALKTGIVAK	Q9BQ61|TRIR_HUMAN	DB Search	ALKTGIVAK	ALKTGIVAK
1129	HIIENIVAV	33.06	1006.58	9	33.3	9	5.1	504.3	2	45.7675	-0.7016	0.89	2259368	Neo_sh14_patient1_HLAI_0412_HM1114_tims_Slot1-36_1_3662.d	48824	0.8144	0.8241	0.0507	3470	37400	2	2	1	1			0 0 1 1 23 74 25 0 0	HIIENIVAV	O76021|RL1D1_HUMAN	DB Search	HIIENIVAV	HIIENIVAV
1130	TPLTKDVSL	36.5	972.549	9	66.7	9	-0.6	487.282	2	33.7168	1.4028	0.82	1663595	Neo_sh14_patient1_HLAI_0412_HM1114_tims_Slot1-36_1_3662.d	36899	0.8493	0.859	-0.0042			1	1	0	0			5 45 66 31 13 1 15 0 0	TPLTKDVSL	O00203|AP3B1_HUMAN	DB Search	TPLTKDVSL	TPLTKDVSL
1131	ILHHHIASV	11.34	1025.58	9	55.6	9	-15.4	513.788	2	12.5517	-1.6884	0.66	622559	Neo_sh14_patient1_HLAI_0412_HM1114_tims_Slot1-36_1_3662.d	13007	0.8346	0.8443	0.0306			1	1	0	0			4 4 14 22 20 0 0 0 0	ILHHHIASV	Q9Y217|MTMR6_HUMAN	DB Search	ILHHHIASV	ILHHHIASV
1132	KINEAIVAV	24.88	955.57	9	77.8	9	16.1	478.8	2	35.0821	-0.5567	0.8	1731174	Neo_sh14_patient1_HLAI_0412_HM1114_tims_Slot1-36_1_3662.d	38382	0.787	0.7966	0.0482	188	3020	2	2	1	1			5 0 0 8 9 47 5 5 5	KINEAIVAV	Q9Y224|RTRAF_HUMAN	DB Search	KINEAIVAV	KINEAIVAV
1133	KVIEINPYL	29.81	1087.63	9	44.4	9	-1.2	544.821	2	47.0833	-2.1465	0.87	2322853	Neo_sh14_patient1_HLAI_0412_HM1114_tims_Slot1-36_1_3662.d	49885	0.8575	0.8672	0.0377	325	5640	2	2	1	1			0 0 0 2 16 32 5 0 0	KVIEINPYL	P28062|PSB8_HUMAN:P28074|PSB5_HUMAN	DB Search	KVIEINPYL	KVIEINPYL
1134	LPSSHVARL	35.81	978.561	9	77.8	9	6.9	490.291	2	19.2216	2.5351	0.7	955556	Neo_sh14_patient1_HLAI_0412_HM1114_tims_Slot1-36_1_3662.d	22868	0.8222	0.8319	0.033			1	1	0	0			5 92 39 13 13 7 1 1 5	LPSSHVARL	A6NHR9|SMHD1_HUMAN	DB Search	LPSSHVARL	LPSSHVARL
1135	IIM(+15.99)PHNIYL	34.23	1128.6	9	66.7	9	3.5	565.309	2	44.5396	1.897	0.56	2195923	Neo_sh14_patient1_HLAI_0412_HM1114_tims_Slot1-36_1_3662.d	47803	0.88	0.8896	0.0252	1460	12900	2	2	1	1	Oxidation (M)	M3:Oxidation (M):1000.00	0 0 29 83 12 0 33 33 5	IIM(+15.99)PHNIYL	P49279|NRAM1_HUMAN	DB Search	IIMPHNIYL	IIMPHNIYL
1136	FGASHSASL	25.18	875.414	9	77.8	9	15	438.721	2	18.4636	-0.8323	0.8	917737	Neo_sh14_patient1_HLAI_0412_HM1114_tims_Slot1-36_1_3662.d	21769	0.7672	0.7769	0.0179			1	1	0	0			5 13 13 18 0 0 11 11 5	FGASHSASL	Q8IXJ9|ASXL1_HUMAN	DB Search	FGASHSASL
1137	KLHDVEHVL	49.67	1088.6	9	100	9	-0.4	545.306	2	19.7739	-1.2288	0.65	980099	Neo_sh14_patient1_HLAI_0412_HM1114_tims_Slot1-36_1_3662.d	23543	0.8532	0.8629	0.032	1110	13000	1	1	1	1			5 17 19 4 3 3 44 19 5	KLHDVEHVL	Q99471|PFD5_HUMAN	DB Search	KLHDVEHVL	KLHDVEHVL
1138	SPSGTILRL	33.96	942.55	9	55.6	9	16.4	472.29	2	39.8179	1.9465	0.93	1965983	Neo_sh14_patient1_HLAI_0412_HM1114_tims_Slot1-36_1_3662.d	43691	0.8094	0.8191	0.0157			1	1	0	0			5 13 48 10 9 0 0 0 0	SPSGTILRL	Q5T5C0|STXB5_HUMAN	DB Search	SPSGTILRL	SPSGTILRL
1139	HLLQYNHRV	38.72	1178.63	9	44.4	9	10.8	393.888	3	15.1679	0.5184	0.71	753182	Neo_sh14_patient1_HLAI_0412_HM1114_tims_Slot1-36_1_3662.d	16946	0.7166	0.7262	0.0186			2	2	0	0			0 0 10 24 77 47 0 0 0	HLLQYNHRV	P17931|LEG3_HUMAN	DB Search	HLLQYNHRV	HLLQYNHRV
1140	LVSTPVRTK	33.5	999.608	9	55.6	9	-0.7	500.811	2	13.7693	-0.3161	0.96	681276	Neo_sh14_patient1_HLAI_0412_HM1114_tims_Slot1-36_1_3662.d	14808	0.8489	0.8586	0.0162	533	7410	1	1	1	1			5 17 16 16 2 1 0 0 0	LVSTPVRTK	O75376|NCOR1_HUMAN	DB Search	LVSTPVRTK	LVSTPVRTK
1141	RQYM(+15.99)FSSLK	15.96	1174.58	9	33.3	9	1.5	588.298	2	19.9035	0.2569	0.71	989533	Neo_sh14_patient1_HLAI_0412_HM1114_tims_Slot1-36_1_3662.d	23797	0.899	0.9087	0.0262			1	1	0	0	Oxidation (M)	M4:Oxidation (M):1000.00	0 0 1 0 19 0 0 55 5	RQYM(+15.99)FSSLK	P13010|XRCC5_HUMAN	DB Search	RQYMFSSLK	RQYMFSSLK
1142	TMHASILAY	37.57	1005.5	9	66.7	9	8.3	503.759	2	37.6209	-1.0949	0.86	1857136	Neo_sh14_patient1_HLAI_0412_HM1114_tims_Slot1-36_1_3662.d	41332	0.8241	0.8338	0.021			2	2	0	0			0 0 0 18 18 68 24 14 5	TMHASILAY	O14980|XPO1_HUMAN	DB Search	TMHASILAY	TMHASILAY
1143	RVDSKTLTR	47.15	1074.61	9	66.7	9	-8.5	538.31	2	6.4067	-2.6644	0.76	314711	Neo_sh14_patient1_HLAI_0412_HM1114_tims_Slot1-36_1_3662.d	2591	0.8761	0.8858	0.0091			2	2	0	0			5 3 3 2 1 2 1 1 5	RVDSKTLTR	Q969V3|NCLN_HUMAN	DB Search	RVDSKTLTR	RVDSKTLTR
1144	SLFWHTFNR	35.45	1206.59	9	44.4	9	9.6	604.31	2	40.2346	-2.0023	0.81	1986640	Neo_sh14_patient1_HLAI_0412_HM1114_tims_Slot1-36_1_3662.d	44152	0.9056	0.9153	0.0296			1	1	0	0			0 0 29 65 98 18 0 0 0	SLFWHTFNR	Q96N96|SPT13_HUMAN	DB Search	SLFWHTFNR	SLFWHTFNR
1145	SVFNHAIRH	48.01	1079.56	9	100	9	1.5	540.789	2	13.2348	0.7297	0.9	654703	Neo_sh14_patient1_HLAI_0412_HM1114_tims_Slot1-36_1_3662.d	13939	0.8369	0.8466	0.0482	15600	203000	3	3	1	1			4 4 91 76 58 16 7 7 5	SVFNHAIRH	Q7L576|CYFP1_HUMAN	DB Search	SVFNHAIRH	SVFNHAIRH
1146	LSNHVFNAL	23.78	1013.53	9	55.6	9	11.4	507.778	2	38.4544	-1.5011	0.79	1898416	Neo_sh14_patient1_HLAI_0412_HM1114_tims_Slot1-36_1_3662.d	42220	0.8373	0.847	0.0178			1	1	0	0			0 0 0 0 57 41 41 34 5	LSNHVFNAL	O14730|RIOK3_HUMAN	DB Search	LSNHVFNAL	LSNHVFNAL
1147	QVNERVLNR	27.39	1126.62	9	22.2	9	-2.8	564.316	2	13.0072	1.7	0.75	643362	Neo_sh14_patient1_HLAI_0412_HM1114_tims_Slot1-36_1_3662.d	13614	0.8699	0.8796	0.0353	331	6920	1	1	1	1			1 0 0 0 0 2 1 1 3	QVNERVLNR	P0C1Z6|TFPT_HUMAN	DB Search	QVNERVLNR	QVNERVLNR
1148	SQHYHQGYY	45.17	1181.49	9	77.8	9	-0.4	591.752	2	10.8462	-0.3079	0.73	533146	Neo_sh14_patient1_HLAI_0412_HM1114_tims_Slot1-36_1_3662.d	9886	0.8734	0.8831	0.0218	120000	1370000	4	4	1	1			0 0 28 28 27 35 35 9 5	SQHYHQGYY	Q00839|HNRPU_HUMAN	DB Search	SQHYHQGYY	SQHYHQGYY
1149	IANENHSTL	23.15	997.483	9	66.7	9	14.8	499.756	2	12.9314	1.5198	0.46	641461	Neo_sh14_patient1_HLAI_0412_HM1114_tims_Slot1-36_1_3662.d	13549	0.8086	0.8183	0.0265			1	1	0	0			5 5 3 3 2 0 4 0 0	IANENHSTL	Q96G01|BICD1_HUMAN	DB Search	IANENHSTL	IANENHSTL
1150	FPNENQVVF	33.37	1092.52	9	55.6	9	0.4	547.269	2	50.568	0.5886	0.87	2496187	Neo_sh14_patient1_HLAI_0412_HM1114_tims_Slot1-36_1_3662.d	52471	0.8454	0.8551	0.0197			3	3	0	0			0 0 0 0 10 34 49 2 2	FPNENQVVF	Q9BS26|ERP44_HUMAN	DB Search	FPNENQVVF	FPNENQVVF
1151	SAVEPKTAL	34.98	914.507	9	77.8	9	3.6	458.263	2	20.4121	0.7655	0.85	1012235	Neo_sh14_patient1_HLAI_0412_HM1114_tims_Slot1-36_1_3662.d	24467	0.768	0.7777	0.0372	775	10200	2	2	1	1			2 2 15 15 4 0 0 6 5	SAVEPKTAL	Q8WWI1|LMO7_HUMAN	DB Search	SAVEPKTAL	SAVEPKTAL
1152	FPYPTKAEL	42.79	1064.55	9	100	9	3.5	533.286	2	41.03	-1.4773	0.86	2026022	Neo_sh14_patient1_HLAI_0412_HM1114_tims_Slot1-36_1_3662.d	44978	0.8369	0.8466	0.0482			1	1	0	0			5 10 19 12 12 3 3 3 3	FPYPTKAEL	Q9H4I2|ZHX3_HUMAN	DB Search	FPYPTKAEL
1153	YPFDGPGNTL	23.27	1079.49	10	50	10	15.8	540.762	2	48.1075	-1.9077	0.62	2375062	Neo_sh14_patient1_HLAI_0412_HM1114_tims_Slot1-36_1_3662.d	50686	0.8427	0.8524	0.0124			1	1	0	0			0 0 0 12 36 0 0 73 17 5	YPFDGPGNTL	P09237|MMP7_HUMAN	DB Search	YPFDGPGNTL	YPFDGPGNTL
1154	TAAPFHAQL	18.17	954.492	9	55.6	9	-6.4	478.25	2	33.7168	-0.0498	0.68	1663598	Neo_sh14_patient1_HLAI_0412_HM1114_tims_Slot1-36_1_3662.d	36902	0.7928	0.8024	0.0324			1	1	0	0			5 22 37 9 9 0 0 0 0	TAAPFHAQL	O43623|SNAI2_HUMAN	DB Search	TAAPFHAQL	TAAPFHAQL
1155	VATEGSREL	32.32	960.488	9	66.7	9	3.5	481.253	2	13.6898	-1.7716	0.94	679367	Neo_sh14_patient1_HLAI_0412_HM1114_tims_Slot1-36_1_3662.d	14735	0.8179	0.8276	0.0072			1	1	0	0			5 63 42 42 7 2 0 0 0	VATEGSREL	Q96C10|DHX58_HUMAN	DB Search	VATEGSREL	VATEGSREL
1156	RLFQTIQRK	13.5	1188.71	9	33.3	9	11.4	397.248	3	14.5619	0.7538	0.51	722932	Neo_sh14_patient1_HLAI_0412_HM1114_tims_Slot1-36_1_3662.d	16072	0.7065	0.7162	0.0087			1	1	0	0			0 0 74 34 0 0 10 0 0	RLFQTIQRK	O94915|FRYL_HUMAN	DB Search	RLFQTIQRK	RLFQTIQRK
1157	ALMDQVHHM	44.79	1080.48	9	66.7	9	1.5	541.25	2	23.6863	-1.2384	0.87	1174745	Neo_sh14_patient1_HLAI_0412_HM1114_tims_Slot1-36_1_3662.d	29081	0.88	0.8896	-0.0048	866	9030	2	2	1	1			0 0 81 26 14 14 11 0 2	ALMDQVHHM	Q96BU1|S1PBP_HUMAN	DB Search	ALMDQVHHM	ALMDQVHHM
1158	RLFAEKINK	36.48	1117.66	9	55.6	9	-4.1	373.559	3	14.7134	1.2765	0.75	730478	Neo_sh14_patient1_HLAI_0412_HM1114_tims_Slot1-36_1_3662.d	16274	0.7258	0.7355	-0.0107			3	3	0	0			0 0 22 43 43 43 16 0 0	RLFAEKINK	Q13045|FLII_HUMAN	DB Search	RLFAEKINK	RLFAEKINK
1159	SLQPSISQK	28.91	986.54	9	55.6	9	2.2	494.278	2	17.8572	-0.4241	0.89	887471	Neo_sh14_patient1_HLAI_0412_HM1114_tims_Slot1-36_1_3662.d	20879	0.8206	0.8303	0.0145			1	1	0	0			0 0 5 18 9 4 4 0 0	SLQPSISQK	Q8IYW5|RN168_HUMAN	DB Search	SLQPSISQK	SLQPSISQK
1160	KILGKMVSK	34.43	1002.63	9	100	9	-2.2	502.319	2	10.8815	-0.0195	0.9	538908	Neo_sh14_patient1_HLAI_0412_HM1114_tims_Slot1-36_1_3662.d	10140	0.8451	0.8547	0.0201			1	1	0	0			5 36 43 6 2 9 8 6 5	KILGKMVSK	O95379|TFIP8_HUMAN	DB Search	KILGKMVSK	KILGKMVSK
1161	VPSPAVPKL	28.28	906.554	9	66.7	9	2.5	454.285	2	38.4923	2.2709	0.74	1900311	Neo_sh14_patient1_HLAI_0412_HM1114_tims_Slot1-36_1_3662.d	42279	0.7792	0.7889	0.0259			1	1	0	0			5 27 83 11 11 14 0 0 0	VPSPAVPKL	O75427|LRCH4_HUMAN:Q9Y2L9|LRCH1_HUMAN:Q96II8|LRCH3_HUMAN:Q5VUJ6|LRCH2_HUMAN	DB Search	VPSPAVPKL	VPSPAVPKL
1162	AMWEHPITA	36.78	1054.49	9	88.9	9	10.4	528.258	2	35.6881	-0.2204	0.73	1761173	Neo_sh14_patient1_HLAI_0412_HM1114_tims_Slot1-36_1_3662.d	39005	0.8516	0.8613	0.0035			1	1	0	0			5 38 30 30 45 0 5 5 5	AMWEHPITA	Q96CD2|COAC_HUMAN	DB Search	AMWEHPITA	AMWEHPITA
1163	TLYEAVREV	43.39	1078.57	9	55.6	9	0.4	540.29	2	35.7303	2.308	0.96	1763057	Neo_sh14_patient1_HLAI_0412_HM1114_tims_Slot1-36_1_3662.d	39053	0.8819	0.8916	0.0133	3580	37800	2	2	1	1			2 2 47 27 6 0 0 0 0	TLYEAVREV	P62906|RL10A_HUMAN	DB Search	TLYEAVREV	TLYEAVREV
1164	FPDEFHLQTL	45.04	1245.6	10	80	10	1.2	623.81	2	53.9371	-0.3148	0.69	2661767	Neo_sh14_patient1_HLAI_0412_HM1114_tims_Slot1-36_1_3662.d	54647	0.9125	0.9222	0.0226			1	1	0	0			5 42 17 17 7 7 36 56 0 0	FPDEFHLQTL	Q96QK1|VPS35_HUMAN	DB Search	FPDEFHLQTL	FPDEFHLQTL
1165	KVYPKAVER	26.76	1088.63	9	44.4	9	-2.4	545.323	2	8.2488	-1.6762	0.88	406001	Neo_sh14_patient1_HLAI_0412_HM1114_tims_Slot1-36_1_3662.d	5753	0.8641	0.8737	0.0311	379	7320	1	1	1	1			5 12 41 7 0 0 0 0 0	KVYPKAVER	O15021|MAST4_HUMAN	DB Search	KVYPKAVER	KVYPKAVER
1166	KVTDPSVAK	33.03	943.534	9	55.6	9	9.7	472.779	2	8.19	-1.9877	0.75	404121	Neo_sh14_patient1_HLAI_0412_HM1114_tims_Slot1-36_1_3662.d	5709	0.7951	0.8048	0.0401			2	2	0	0			5 55 12 12 0 0 3 0 0	KVTDPSVAK	O60502|OGA_HUMAN	DB Search	KVTDPSVAK	KVTDPSVAK
1167	LPSDVPLHF	31.79	1023.54	9	55.6	9	5.6	512.78	2	51.9682	0.7374	0.57	2564871	Neo_sh14_patient1_HLAI_0412_HM1114_tims_Slot1-36_1_3662.d	53223	0.8485	0.8582	-0.0034			1	1	0	0			5 83 24 12 0 0 16 0 0	LPSDVPLHF	A0AUZ9|KAL1L_HUMAN	DB Search	LPSDVPLHF	LPSDVPLHF
1168	HPVRDPVHM	37.14	1086.54	9	55.6	9	-2.3	544.276	2	13.3485	-1.5249	0.71	662341	Neo_sh14_patient1_HLAI_0412_HM1114_tims_Slot1-36_1_3662.d	14233	0.8443	0.854	0.0409			1	1	0	0			5 9 4 0 0 5 5 0 0	HPVRDPVHM	Q8IZ52|CHSS2_HUMAN	DB Search	HPVRDPVHM
1169	KLDPTKTTL	38.19	1015.59	9	100	9	-0.4	508.803	2	20.4935	2.9539	0.79	1015988	Neo_sh14_patient1_HLAI_0412_HM1114_tims_Slot1-36_1_3662.d	24548	0.8257	0.8354	0.0395	7430	60100	2	2	1	1			5 48 57 12 12 5 15 15 5	KLDPTKTTL	Q92597|NDRG1_HUMAN	DB Search	KLDPTKTTL	KLDPTKTTL
1170	RISKEVIRK	23.64	1127.71	9	11.1	9	4.8	564.867	2	5.119	-1.1707	0.5	251242	Neo_sh14_patient1_HLAI_0412_HM1114_tims_Slot1-36_1_3662.d	1546	0.8718	0.8815	0.0433			2	2	0	0			2 0 0 1 1 1 1 1 1	RISKEVIRK	O75521|ECI2_HUMAN	DB Search	RISKEVIRK	RISKEVIRK
1171	HLTDITLKV	42.95	1038.61	9	66.7	9	-1.2	520.31	2	38.6002	2.2895	0.79	1902179	Neo_sh14_patient1_HLAI_0412_HM1114_tims_Slot1-36_1_3662.d	42311	0.8458	0.8555	0.0393	1380	15200	1	1	1	1			5 11 0 23 50 75 47 0 0	HLTDITLKV	Q15046|SYK_HUMAN	DB Search	HLTDITLKV	HLTDITLKV
1172	LPSGSSAHL	23.05	867.445	9	55.6	9	4.6	434.732	2	20.093	1.4661	0.82	999027	Neo_sh14_patient1_HLAI_0412_HM1114_tims_Slot1-36_1_3662.d	24111	0.7711	0.7808	0.0141			1	1	0	0			5 68 22 0 0 4 4 0 0	LPSGSSAHL	Q66K74|MAP1S_HUMAN	DB Search	LPSGSSAHL
1173	YANIGKTL	33.61	878.486	8	75	8	14.4	440.257	2	23.5029	-0.049	0.69	1169058	Neo_sh14_patient1_HLAI_0412_HM1114_tims_Slot1-36_1_3662.d	28902	0.7808	0.7904	0.0144			1	1	0	0			5 17 21 21 19 13 0 0	YANIGKTL	Q96LZ7|RMD2_HUMAN	DB Search	YANIGKTL	YANIGKTL
1174	ALFTHKMVHK	47.67	1210.66	10	100	10	3.5	606.342	2	11.9442	0.9924	0.73	592131	Neo_sh14_patient1_HLAI_0412_HM1114_tims_Slot1-36_1_3662.d	11955	0.9207	0.9304	0.0545			3	3	0	0			5 50 55 84 84 83 29 66 64 5	ALFTHKMVHK	P08048|ZFY_HUMAN:P17010|ZFX_HUMAN	DB Search	ALFTHKMVHK	ALFTHKMVHK
1175	RQIPYTM(+15.99)M(+15.99)K	29.9	1198.58	9	44.4	9	3.2	600.301	2	13.3173	0.8121	0.71	654700	Neo_sh14_patient1_HLAI_0412_HM1114_tims_Slot1-36_1_3662.d	13936	0.899	0.9087	0.0262	3740	28900	3	3	1	1	Oxidation (M);Oxidation (M)	M7:Oxidation (M):1000.00;M8:Oxidation (M):1000.00	0 0 0 3 3 12 6 0 0	RQIPYTM(+15.99)M(+15.99)K	Q00325|MPCP_HUMAN	DB Search	RQIPYTMMK	RQIPYTMMK
1176	SPDGSDPKL	35.3	914.434	9	77.8	9	4.1	458.226	2	14.9787	-0.1775	0.73	743715	Neo_sh14_patient1_HLAI_0412_HM1114_tims_Slot1-36_1_3662.d	16659	0.7626	0.7723	0.0326			1	1	0	0			5 17 15 9 5 5 5 0 0	SPDGSDPKL	Q8TAF3|WDR48_HUMAN	DB Search	SPDGSDPKL	SPDGSDPKL
1177	AVAHALTEK	42.63	938.519	9	100	9	-2.7	470.265	2	8.7963	-0.5007	0.66	434438	Neo_sh14_patient1_HLAI_0412_HM1114_tims_Slot1-36_1_3662.d	6650	0.8055	0.8152	0.0296			1	1	0	0			5 5 32 24 13 11 6 5 5	AVAHALTEK	P49368|TCPG_HUMAN	DB Search	AVAHALTEK	AVAHALTEK
1178	TLDQKIERV	31.34	1100.62	9	77.8	9	3	551.318	2	19.1485	-0.8186	0.87	949855	Neo_sh14_patient1_HLAI_0412_HM1114_tims_Slot1-36_1_3662.d	22675	0.8691	0.8788	0.0461	761	11200	1	1	1	1			3 3 38 38 42 10 0 0 2	TLDQKIERV	Q9BXX0|EMIL2_HUMAN	DB Search	TLDQKIERV	TLDQKIERV
1179	TVAVPLVGK	35.8	882.554	9	66.7	9	4.9	442.286	2	36.3648	1.2721	0.93	1796900	Neo_sh14_patient1_HLAI_0412_HM1114_tims_Slot1-36_1_3662.d	39848	0.7637	0.7734	0.0214	14100	120000	5	5	1	1			5 6 15 15 11 11 1 0 0	TVAVPLVGK	Q9BUN8|DERL1_HUMAN	DB Search	TVAVPLVGK	TVAVPLVGK
1180	GIYAYGFEK	38.91	1046.51	9	44.4	9	1.9	524.262	2	34.6269	-1.6837	0.86	1708660	Neo_sh14_patient1_HLAI_0412_HM1114_tims_Slot1-36_1_3662.d	37900	0.8606	0.8703	0.0146			1	1	0	0			0 0 71 73 25 13 0 0 0	GIYAYGFEK	P38919|IF4A3_HUMAN:P60842|IF4A1_HUMAN:Q14240|IF4A2_HUMAN	DB Search	GIYAYGFEK	GIYAYGFEK
1181	TAVTAAHIL	21.21	895.513	9	66.7	9	1.1	448.764	2	33.326	-0.8284	0.78	1646729	Neo_sh14_patient1_HLAI_0412_HM1114_tims_Slot1-36_1_3662.d	36557	0.7808	0.7904	0.0144			1	1	0	0			5 24 89 32 16 11 0 0 0	TAVTAAHIL	Q9NRM7|LATS2_HUMAN	DB Search	TAVTAAHIL
1182	ALSTALSEK	34.9	918.502	9	77.8	9	9.1	460.263	2	18.9944	-4.2322	0.94	944215	Neo_sh14_patient1_HLAI_0412_HM1114_tims_Slot1-36_1_3662.d	22543	0.7935	0.8032	0.0216			2	2	0	0			5 14 18 18 12 12 2 0 0	ALSTALSEK	P02545|LMNA_HUMAN	DB Search	ALSTALSEK	ALSTALSEK
1183	VTFEKIFSQK	45.64	1225.67	10	80	10	1.8	613.844	2	36.3321	-3.1803	0.7	1793146	Neo_sh14_patient1_HLAI_0412_HM1114_tims_Slot1-36_1_3662.d	39766	0.9467	0.9564	0.0184			1	1	0	0			5 77 80 37 37 36 23 5 0 0	VTFEKIFSQK	P25098|ARBK1_HUMAN	DB Search	VTFEKIFSQK	VTFEKIFSQK
1184	KVLHFFNVK	44.42	1130.66	9	100	9	1	566.338	2	24.5641	-1.0221	0.87	1222154	Neo_sh14_patient1_HLAI_0412_HM1114_tims_Slot1-36_1_3662.d	30590	0.8745	0.8842	0.0406			1	1	0	0			5 41 96 97 49 9 4 24 5	KVLHFFNVK	O94855|SC24D_HUMAN	DB Search	KVLHFFNVK	KVLHFFNVK
1185	KVAVKILNR	26.2	1039.69	9	66.7	9	2.9	520.852	2	16.3417	1.5642	0.91	811743	Neo_sh14_patient1_HLAI_0412_HM1114_tims_Slot1-36_1_3662.d	18591	0.871	0.8807	0.0141			1	1	0	0			5 45 26 26 18 5 0 0 0	KVAVKILNR	Q13131|AAPK1_HUMAN:P54646|AAPK2_HUMAN	DB Search	KVAVKILNR	KVAVKILNR
1186	KLNENAISR	38.53	1043.57	9	55.6	9	1.7	522.794	2	11.0653	-0.165	0.96	546495	Neo_sh14_patient1_HLAI_0412_HM1114_tims_Slot1-36_1_3662.d	10383	0.8327	0.8423	0.0425	248	4690	2	2	1	1			5 61 24 23 3 1 1 0 0	KLNENAISR	O95361|TRI16_HUMAN	DB Search	KLNENAISR	KLNENAISR
1187	FAIDKTIAY	23.31	1040.55	9	55.6	9	-1.7	521.284	2	42.6956	0.0079	0.65	2108317	Neo_sh14_patient1_HLAI_0412_HM1114_tims_Slot1-36_1_3662.d	46489	0.8272	0.8369	0.0479			1	1	0	0			5 33 33 25 0 34 0 0 0	FAIDKTIAY	Q9UL12|SARDH_HUMAN	DB Search	FAIDKTIAY	FAIDKTIAY
1188	LPWASTHSL	38.38	1010.52	9	66.7	9	-1.1	506.266	2	39.6664	-3.2916	0.87	1958488	Neo_sh14_patient1_HLAI_0412_HM1114_tims_Slot1-36_1_3662.d	43540	0.8392	0.8489	0.0059			1	1	0	0			5 49 87 30 4 4 0 0 0	LPWASTHSL	Q8TEZ7|PAQR8_HUMAN	DB Search	LPWASTHSL	LPWASTHSL
1189	M(+15.99)PEKEPSVL	21.79	1044.52	9	66.7	9	15.4	523.273	2	21.7219	-0.4968	0.66	1080222	Neo_sh14_patient1_HLAI_0412_HM1114_tims_Slot1-36_1_3662.d	26358	0.8513	0.861	0.0039			2	2	0	0	Oxidation (M)	M1:Oxidation (M):1000.00	5 10 10 0 4 0 0 20 5	M(+15.99)PEKEPSVL	Q96T76|MMS19_HUMAN	DB Search	MPEKEPSVL	MPEKEPSVL
1190	LPTEAEVKL	33.43	998.565	9	88.9	9	10.1	500.295	2	38.0375	-5.4595	0.79	1877771	Neo_sh14_patient1_HLAI_0412_HM1114_tims_Slot1-36_1_3662.d	41771	0.7932	0.8028	0.052	245	4040	5	5	1	1			5 70 33 12 0 17 10 10 5	LPTEAEVKL	Q8IVF7|FMNL3_HUMAN	DB Search	LPTEAEVKL
1191	NFDRSSSTF	38.63	1059.46	9	100	9	3.8	530.74	2	20.7371	-0.6295	0.79	1031103	Neo_sh14_patient1_HLAI_0412_HM1114_tims_Slot1-36_1_3662.d	24975	0.842	0.8516	0.0032			1	1	0	0			5 23 15 4 4 8 17 46 5	NFDRSSSTF	Q8N3U4|STAG2_HUMAN	DB Search	NFDRSSSTF	NFDRSSSTF
1192	ILYGPPGTGK	31.77	1001.55	10	50	10	4.6	501.787	2	24.1093	-16.3817	0.92	1199353	Neo_sh14_patient1_HLAI_0412_HM1114_tims_Slot1-36_1_3662.d	29821	0.8094	0.8191	0.0257			1	1	0	0			5 14 64 64 23 0 0 0 0 0	ILYGPPGTGK	P62191|PRS4_HUMAN	DB Search	ILYGPPGTGK	ILYGPPGTGK
1193	VANNRIITL	31.43	1012.6	9	88.9	9	-1.4	507.308	2	36.2185	-1.43	0.83	1787507	Neo_sh14_patient1_HLAI_0412_HM1114_tims_Slot1-36_1_3662.d	39635	0.8063	0.816	0.0488			1	1	0	0			5 75 6 6 0 41 48 32 5	VANNRIITL	Q7L099|RUFY3_HUMAN	DB Search	VANNRIITL	VANNRIITL
1194	MPYDSNRVVL	40.75	1192.59	10	60	10	1.1	597.303	2	38.7324	0.5494	0.88	1909701	Neo_sh14_patient1_HLAI_0412_HM1114_tims_Slot1-36_1_3662.d	42489	0.8745	0.8842	0.0506	3240	32400	4	4	1	1			5 35 88 36 6 2 0 0 0 0	MPYDSNRVVL	Q9H3S7|PTN23_HUMAN	DB Search	MPYDSNRVVL	MPYDSNRVVL
1195	LPVGQHIYL	36.1	1038.59	9	55.6	9	-3.7	520.298	2	44.0203	-0.3553	0.69	2173524	Neo_sh14_patient1_HLAI_0412_HM1114_tims_Slot1-36_1_3662.d	47436	0.8718	0.8815	-0.0067			2	2	0	0			5 14 18 0 0 12 10 0 0	LPVGQHIYL	P00387|NB5R3_HUMAN	DB Search	LPVGQHIYL
1196	VTYSLPRTK	26.81	1063.6	9	55.6	9	3.2	532.81	2	20.093	-0.1317	0.88	999033	Neo_sh14_patient1_HLAI_0412_HM1114_tims_Slot1-36_1_3662.d	24117	0.8695	0.8792	0.0157			1	1	0	0			5 50 99 14 14 0 0 0 0	VTYSLPRTK	Q9BRD0|BUD13_HUMAN	DB Search	VTYSLPRTK	VTYSLPRTK
1197	FPTTDGNHL	31.15	1000.46	9	55.6	9	1.3	501.239	2	24.3365	-0.9486	0.83	1210696	Neo_sh14_patient1_HLAI_0412_HM1114_tims_Slot1-36_1_3662.d	30148	0.8044	0.8141	0.0308			1	1	0	0			5 52 67 49 30 0 0 0 0	FPTTDGNHL	Q96PE3|INP4A_HUMAN	DB Search	FPTTDGNHL
1198	AVGPHLTAK	38.82	892.513	9	100	9	4.5	447.266	2	12.3239	-0.5938	0.89	611112	Neo_sh14_patient1_HLAI_0412_HM1114_tims_Slot1-36_1_3662.d	12576	0.7986	0.8083	0.0066	3440	32400	2	2	1	1			5 7 37 35 16 5 2 4 4	AVGPHLTAK	Q8WVP5|TP8L1_HUMAN	DB Search	AVGPHLTAK	AVGPHLTAK
1199	HPDVTEAML	34.9	1011.47	9	55.6	9	10.1	506.747	2	34.551	-3.4541	0.87	1704885	Neo_sh14_patient1_HLAI_0412_HM1114_tims_Slot1-36_1_3662.d	37797	0.7974	0.8071	0.0577			2	2	0	0			0 0 6 0 0 28 77 31 5	HPDVTEAML	P11940|PABP1_HUMAN:Q9H361|PABP3_HUMAN:Q4VXU2|PAP1L_HUMAN	DB Search	HPDVTEAML	HPDVTEAML
1200	TPTGIKVVM	43.57	944.537	9	88.9	9	3.9	473.277	2	35.8953	4.7501	0.49	1768717	Neo_sh14_patient1_HLAI_0412_HM1114_tims_Slot1-36_1_3662.d	39205	0.7858	0.7955	0.0394	1080	12500	3	3	1	1			5 11 6 0 20 21 45 6 5	TPTGIKVVM	Q9Y5R8|TPPC1_HUMAN	DB Search	TPTGIKVVM	TPTGIKVVM
1201	IPILYEHQL	20.82	1124.62	9	66.7	9	14.7	563.327	2	47.0479	-0.7072	0.7	2322840	Neo_sh14_patient1_HLAI_0412_HM1114_tims_Slot1-36_1_3662.d	49872	0.9234	0.9331	-0.0183			1	1	0	0			5 10 10 73 21 11 0 0 0	IPILYEHQL	Q9Y520|PRC2C_HUMAN	DB Search	IPILYEHQL	IPILYEHQL
1202	VLYENPNLK	42.55	1088.59	9	66.7	9	5.3	545.303	2	24.5262	-1.5628	0.93	1220210	Neo_sh14_patient1_HLAI_0412_HM1114_tims_Slot1-36_1_3662.d	30482	0.8722	0.8819	0.023			1	1	0	0			5 19 36 29 29 2 1 0 0	VLYENPNLK	Q14204|DYHC1_HUMAN	DB Search	VLYENPNLK	VLYENPNLK
1203	LPHQDVLIM	41.48	1064.57	9	66.7	9	3.3	533.293	2	44.4745	-1.0427	0.93	2195926	Neo_sh14_patient1_HLAI_0412_HM1114_tims_Slot1-36_1_3662.d	47806	0.8683	0.878	-0.0032	6950	64500	5	5	1	1			0 0 0 4 5 33 95 3 3	LPHQDVLIM	Q6FHJ7|SFRP4_HUMAN	DB Search	LPHQDVLIM
1204	NADPQAVTM(+15.99)	20.58	961.418	9	66.7	9	4.2	481.718	2	14.6489	-4.0097	0.77	722909	Neo_sh14_patient1_HLAI_0412_HM1114_tims_Slot1-36_1_3662.d	16049	0.787	0.7966	-0.0018	686	7170	1	1	1	1	Oxidation (M)	M9:Oxidation (M):1000.00	0 0 0 23 35 66 66 8 5	NADPQAVTM(+15.99)	Q9UNF1|MAGD2_HUMAN	DB Search	NADPQAVTM	NADPQAVTM
1205	LPSSRQLVL	30.02	1011.61	9	88.9	9	0.8	506.812	2	38.4341	1.4548	0.7	1894653	Neo_sh14_patient1_HLAI_0412_HM1114_tims_Slot1-36_1_3662.d	42129	0.8133	0.823	0.0519	372	4630	2	2	1	1			5 66 14 2 0 3 24 11 5	LPSSRQLVL	O75165|DJC13_HUMAN	DB Search	LPSSRQLVL	LPSSRQLVL
1206	KLHDINAQL	34.58	1050.58	9	77.8	9	0.4	526.299	2	21.6877	-0.1834	0.91	1078309	Neo_sh14_patient1_HLAI_0412_HM1114_tims_Slot1-36_1_3662.d	26281	0.8493	0.859	0.0258	12100	115000	2	2	1	1			0 0 4 22 30 30 73 30 5	KLHDINAQL	Q10567|AP1B1_HUMAN	DB Search	KLHDINAQL	KLHDINAQL
1207	HPTHEWQAL	40.34	1117.53	9	88.9	9	-1.4	559.772	2	20.5478	0.7415	0.78	1021688	Neo_sh14_patient1_HLAI_0412_HM1114_tims_Slot1-36_1_3662.d	24740	0.8505	0.8602	0.0347	3650	31700	3	3	1	1			5 4 4 0 32 94 71 23 5	HPTHEWQAL	Q9H173|SIL1_HUMAN	DB Search	HPTHEWQAL	HPTHEWQAL
1208	ILAKAVISK	27.48	941.627	9	77.8	9	1.8	471.822	2	18.4636	5.0576	0.85	917730	Neo_sh14_patient1_HLAI_0412_HM1114_tims_Slot1-36_1_3662.d	21762	0.8125	0.8222	0.0326			1	1	0	0			5 45 29 14 4 9 7 0 0	ILAKAVISK	Q86XA9|HTR5A_HUMAN	DB Search	ILAKAVISK	ILAKAVISK
1209	YITERIIAV	43.93	1076.62	9	88.9	9	-10.3	539.313	2	45.0043	0.1172	0.86	2221998	Neo_sh14_patient1_HLAI_0412_HM1114_tims_Slot1-36_1_3662.d	48174	0.8319	0.8416	0.0633			2	2	0	0			5 10 6 5 0 8 11 5 5	YITERIIAV	Q68CZ2|TENS3_HUMAN	DB Search	YITERIIAV	YITERIIAV
1210	DPIHGHIEL	46.16	1029.52	9	77.8	9	7.3	515.773	2	33.4397	6.3338	0.7	1652344	Neo_sh14_patient1_HLAI_0412_HM1114_tims_Slot1-36_1_3662.d	36664	0.8203	0.8299	0.0149			3	3	0	0			5 5 17 7 6 6 27 0 0	DPIHGHIEL	Q9Y3Z3|SAMH1_HUMAN	DB Search	DPIHGHIEL
1211	KLDQTIMRK	27.11	1131.64	9	55.6	9	1.8	566.83	2	12.6657	-0.1327	0.88	628225	Neo_sh14_patient1_HLAI_0412_HM1114_tims_Slot1-36_1_3662.d	13165	0.8768	0.8865	0.0283			1	1	0	0			5 59 33 33 7 1 1 0 0	KLDQTIMRK	Q6STE5|SMRD3_HUMAN:Q96GM5|SMRD1_HUMAN	DB Search	KLDQTIMRK	KLDQTIMRK
1212	KTWSNRITEK	23.63	1261.68	10	50	10	3.8	631.849	2	10.8815	-0.3488	0.67	538868	Neo_sh14_patient1_HLAI_0412_HM1114_tims_Slot1-36_1_3662.d	10100	0.9176	0.9273	0.0376			2	2	0	0			5 6 9 6 0 0 0 0 0 2	KTWSNRITEK	Q70UQ0|IKIP_HUMAN	DB Search	KTWSNRITEK	KTWSNRITEK
1213	ALASLIRSV	31.18	928.571	9	66.7	9	-1.8	465.292	2	45.3449	1.9374	0.92	2238792	Neo_sh14_patient1_HLAI_0412_HM1114_tims_Slot1-36_1_3662.d	48444	0.8125	0.8222	0.0126			1	1	0	0			2 2 39 12 12 3 0 0 0	ALASLIRSV	Q9Y646|CBPQ_HUMAN	DB Search	ALASLIRSV	ALASLIRSV
1214	SLYGPGTNR	45.24	963.477	9	44.4	9	5.5	482.749	2	15.0941	-2.7212	0.94	745635	Neo_sh14_patient1_HLAI_0412_HM1114_tims_Slot1-36_1_3662.d	16743	0.809	0.8187	0.0161	6620	71100	3	3	1	1			0 0 93 43 9 3 1 0 0	SLYGPGTNR	Q9UMY1|NOL7_HUMAN	DB Search	SLYGPGTNR	SLYGPGTNR
1215	VLLDKIKNL	25.19	1054.67	9	77.8	9	-0.4	528.345	2	40.7649	5.4434	0.82	2012897	Neo_sh14_patient1_HLAI_0412_HM1114_tims_Slot1-36_1_3662.d	44705	0.8784	0.8881	0.0268			2	2	0	0			5 7 56 29 14 14 25 0 0	VLLDKIKNL	P12111|CO6A3_HUMAN	DB Search	VLLDKIKNL
1216	TVIDSQTHY	25.62	1062.5	9	33.3	9	-3.4	532.255	2	20.1604	-0.7511	0.86	1000904	Neo_sh14_patient1_HLAI_0412_HM1114_tims_Slot1-36_1_3662.d	24152	0.8311	0.8408	0.034	422	5120	1	1	1	1			0 0 45 20 0 0 5 0 0	TVIDSQTHY	Q9Y3Q3|TMED3_HUMAN	DB Search	TVIDSQTHY	TVIDSQTHY
1217	TANNDHTVL	44.17	983.467	9	77.8	9	2.5	492.742	2	14.3037	0.0326	0.84	705872	Neo_sh14_patient1_HLAI_0412_HM1114_tims_Slot1-36_1_3662.d	15536	0.7908	0.8005	0.0243	3320	39700	2	2	1	1			5 24 12 9 9 6 28 1 1	TANNDHTVL	O75179|ANR17_HUMAN	DB Search	TANNDHTVL	TANNDHTVL
1218	FFSPKVVSL	31.26	1022.58	9	55.6	9	2.6	512.299	2	51.1735	1.4085	0.61	2525936	Neo_sh14_patient1_HLAI_0412_HM1114_tims_Slot1-36_1_3662.d	52844	0.8373	0.847	0.0278			1	1	0	0			5 13 57 4 1 0 0 0 5	FFSPKVVSL	P46940|IQGA1_HUMAN	DB Search	FFSPKVVSL	FFSPKVVSL
1219	SILHDVVEV	24.94	1009.54	9	55.6	9	3.2	505.781	2	44.7393	-4.1695	0.84	2208938	Neo_sh14_patient1_HLAI_0412_HM1114_tims_Slot1-36_1_3662.d	47966	0.8315	0.8412	0.0237			1	1	0	0			0 0 0 0 14 90 97 27 5	SILHDVVEV	O75391|SPAG7_HUMAN	DB Search	SILHDVVEV	SILHDVVEV
1220	IVNHRIYYK	38.6	1204.67	9	100	9	-1.2	603.342	2	12.286	-0.7825	0.73	609204	Neo_sh14_patient1_HLAI_0412_HM1114_tims_Slot1-36_1_3662.d	12504	0.9048	0.9145	0.0504			1	1	0	0			5 46 39 9 3 6 6 9 5	IVNHRIYYK	Q96JP0|FEM1C_HUMAN	DB Search	IVNHRIYYK	IVNHRIYYK
1221	RSNFVLHNK	38.38	1113.6	9	55.6	9	-2.7	557.808	2	9.1376	-0.5614	0.36	451579	Neo_sh14_patient1_HLAI_0412_HM1114_tims_Slot1-36_1_3662.d	7267	0.8691	0.8788	0.0261			1	1	0	0			5 8 0 0 9 7 7 0 0	RSNFVLHNK	Q14592|ZN460_HUMAN	DB Search	RSNFVLHNK
1222	ATHTAFVAK	37.07	944.508	9	77.8	9	-6.9	473.258	2	9.8955	-1.7348	0.74	489463	Neo_sh14_patient1_HLAI_0412_HM1114_tims_Slot1-36_1_3662.d	8431	0.8354	0.8451	-0.0002			1	1	0	0			0 0 25 7 7 35 5 2 2	ATHTAFVAK	P42166|LAP2A_HUMAN	DB Search	ATHTAFVAK	ATHTAFVAK
1223	FYEGIKVIL	12.96	1080.62	9	44.4	9	-0.5	541.318	2	51.5897	-0.3164	0.5	2546318	Neo_sh14_patient1_HLAI_0412_HM1114_tims_Slot1-36_1_3662.d	53030	0.8586	0.8683	0.0365			1	1	0	0			5 0 0 0 20 40 54 0 0	FYEGIKVIL	Q66K14|TBC9B_HUMAN	DB Search	FYEGIKVIL
1224	LLPNHVLQK	28.63	1060.64	9	66.7	9	5	531.33	2	22.2402	-2.2213	0.9	1102809	Neo_sh14_patient1_HLAI_0412_HM1114_tims_Slot1-36_1_3662.d	26913	0.8761	0.8858	0.0191	565	6800	1	1	1	1			3 3 28 20 3 3 0 0 0	LLPNHVLQK	P51003|PAPOA_HUMAN	DB Search	LLPNHVLQK	LLPNHVLQK
1225	RVSDINFTL	30.88	1063.57	9	55.6	9	9.2	532.795	2	46.9723	0.0911	0.96	2319113	Neo_sh14_patient1_HLAI_0412_HM1114_tims_Slot1-36_1_3662.d	49817	0.8439	0.8536	0.0313	1400	22000	3	3	1	1			0 0 0 0 32 32 43 5 5	RVSDINFTL	Q5H9R7|PP6R3_HUMAN	DB Search	RVSDINFTL	RVSDINFTL
1226	IVGTVLIIK	26.57	954.648	9	66.7	9	8.7	478.335	2	46.7452	0.8933	0.5	2307910	Neo_sh14_patient1_HLAI_0412_HM1114_tims_Slot1-36_1_3662.d	49630	0.8396	0.8493	-0.0045			2	2	0	0			5 56 16 16 25 17 0 0 0	IVGTVLIIK	P20036|DPA1_HUMAN	DB Search	IVGTVLIIK	IVGTVLIIK
1227	GTAQLTLLH	19.79	952.534	9	22.2	9	3.5	477.276	2	36.37	0.3719	0.7	1795032	Neo_sh14_patient1_HLAI_0412_HM1114_tims_Slot1-36_1_3662.d	39816	0.8365	0.8462	-0.0014			2	2	0	0			0 0 0 0 93 0 21 0 0	GTAQLTLLH	Q2VPB7|AP5B1_HUMAN	DB Search	GTAQLTLLH	GTAQLTLLH
1228	FANDDRHVM	46.77	1103.48	9	100	9	-0.2	552.748	2	14.8651	-2.0356	0.84	736157	Neo_sh14_patient1_HLAI_0412_HM1114_tims_Slot1-36_1_3662.d	16445	0.8582	0.8679	0.0169	195	3340	1	1	1	1			5 84 19 9 9 7 28 10 5	FANDDRHVM	Q96SI9|STRBP_HUMAN	DB Search	FANDDRHVM	FANDDRHVM
1229	MPDIIIKAL	37.72	1012.6	9	77.8	9	5	507.309	2	54.2026	-1.2838	0.41	2674993	Neo_sh14_patient1_HLAI_0412_HM1114_tims_Slot1-36_1_3662.d	55021	0.8296	0.8392	0.0256			1	1	0	0			5 10 9 10 23 38 0 0 5	MPDIIIKAL	P49815|TSC2_HUMAN	DB Search	MPDIIIKAL	MPDIIIKAL
1230	TLYSKNIKK	27.6	1093.65	9	33.3	9	1.1	547.833	2	8.4174	-1.6842	0.89	415485	Neo_sh14_patient1_HLAI_0412_HM1114_tims_Slot1-36_1_3662.d	6057	0.8745	0.8842	0.0506			1	1	0	0			0 0 47 10 6 0 0 0 0	TLYSKNIKK	Q8N8B7|TEANC_HUMAN	DB Search	TLYSKNIKK
1231	ALWGRTTLK	34.48	1044.61	9	77.8	9	-4.5	523.309	2	24.3596	-2.697	0.84	1208761	Neo_sh14_patient1_HLAI_0412_HM1114_tims_Slot1-36_1_3662.d	30049	0.8683	0.878	0.0268	642	8310	2	2	1	1			5 19 39 0 0 2 2 3 3	ALWGRTTLK	P51398|RT29_HUMAN	DB Search	ALWGRTTLK	ALWGRTTLK
1232	SANSHNIAL	30.18	925.462	9	77.8	9	1.6	463.739	2	19.3731	3.6698	0.86	963106	Neo_sh14_patient1_HLAI_0412_HM1114_tims_Slot1-36_1_3662.d	23074	0.7947	0.8044	0.0105			2	2	0	0			4 4 8 0 1 29 78 16 5	SANSHNIAL	Q12769|NU160_HUMAN	DB Search	SANSHNIAL	SANSHNIAL
1233	MPVGM(+15.99)THGL	17.04	957.441	9	33.3	9	5.1	479.73	2	22.6689	-0.1417	0.73	1127428	Neo_sh14_patient1_HLAI_0412_HM1114_tims_Slot1-36_1_3662.d	27664	0.7955	0.8052	0.0197			2	2	0	0	Oxidation (M)	M5:Oxidation (M):28.70	5 66 66 0 0 0 0 0 0	MPVGM(+15.99)THGL	O94842|TOX4_HUMAN	DB Search	MPVGMTHGL	MPVGMTHGL
1234	KLIDKLDSL	26.03	1043.62	9	77.8	9	6.5	522.822	2	37.7723	1.3725	0.66	1864607	Neo_sh14_patient1_HLAI_0412_HM1114_tims_Slot1-36_1_3662.d	41459	0.8489	0.8586	0.0362			1	1	0	0			5 77 51 34 0 0 9 8 5	KLIDKLDSL	Q8N1I0|DOCK4_HUMAN	DB Search	KLIDKLDSL	KLIDKLDSL
1235	LPVKVMEAL	33.08	998.583	9	100	9	12.4	500.305	2	48.2967	-1.1114	0.55	2384389	Neo_sh14_patient1_HLAI_0412_HM1114_tims_Slot1-36_1_3662.d	50833	0.828	0.8377	0.0371			4	4	0	0			5 19 19 3 3 5 5 16 5	LPVKVMEAL	Q8WUM0|NU133_HUMAN	DB Search	LPVKVMEAL
1236	FILESQHTL	42.5	1086.57	9	55.6	9	4.5	544.295	2	40.727	-0.4832	0.79	2011023	Neo_sh14_patient1_HLAI_0412_HM1114_tims_Slot1-36_1_3662.d	44667	0.8691	0.8788	0.0161			3	3	0	0			5 6 72 37 0 0 24 0 0	FILESQHTL	Q8IZQ1|WDFY3_HUMAN	DB Search	FILESQHTL	FILESQHTL
1237	HPDEPLYSF	28.31	1103.49	9	55.6	9	-5.3	552.751	2	40.7649	-1.427	0.73	2012889	Neo_sh14_patient1_HLAI_0412_HM1114_tims_Slot1-36_1_3662.d	44697	0.821	0.8307	0.0641			1	1	0	0			0 0 10 0 0 5 41 16 5	HPDEPLYSF	Q9Y5Q9|TF3C3_HUMAN	DB Search	HPDEPLYSF	HPDEPLYSF
1238	VLDDKDYFL	25.82	1126.55	9	88.9	9	10	564.29	2	48.0696	-0.8035	0.81	2373202	Neo_sh14_patient1_HLAI_0412_HM1114_tims_Slot1-36_1_3662.d	50662	0.8706	0.8803	0.0345			1	1	0	0			5 18 4 4 0 6 24 9 5	VLDDKDYFL	P61604|CH10_HUMAN	DB Search	VLDDKDYFL	VLDDKDYFL
1239	RLPEAIEEV	40.89	1054.57	9	66.7	9	-0.2	528.29	2	37.5072	-0.2305	0.92	1851476	Neo_sh14_patient1_HLAI_0412_HM1114_tims_Slot1-36_1_3662.d	41180	0.8187	0.8284	0.0564			1	1	0	0			0 0 0 2 15 83 93 40 5	RLPEAIEEV	Q9UBQ7|GRHPR_HUMAN	DB Search	RLPEAIEEV	RLPEAIEEV
1240	KIYNANYLK	49.91	1125.62	9	100	9	0.1	563.816	2	19.4466	-0.1363	0.77	964998	Neo_sh14_patient1_HLAI_0412_HM1114_tims_Slot1-36_1_3662.d	23130	0.9094	0.9191	0.0057	147	2560	1	1	1	1			5 69 68 31 20 20 49 4 4	KIYNANYLK	Q8WUB2|F216A_HUMAN	DB Search	KIYNANYLK	KIYNANYLK
1241	SLYEMVSRV	33.42	1082.54	9	77.8	9	5.1	542.282	2	45.6855	1.7886	0.91	2255633	Neo_sh14_patient1_HLAI_0412_HM1114_tims_Slot1-36_1_3662.d	48761	0.8648	0.8745	0.0203			2	2	0	0			4 4 82 45 22 5 2 0 1	SLYEMVSRV	Q08945|SSRP1_HUMAN	DB Search	SLYEMVSRV	SLYEMVSRV
1242	KVLDHFRRK	31.26	1197.71	9	22.2	9	1.5	599.863	2	7.9796	0.2273	0.38	392683	Neo_sh14_patient1_HLAI_0412_HM1114_tims_Slot1-36_1_3662.d	5287	0.9133	0.923	0.0218	1010	23500	4	4	1	1			5 2 1 1 0 0 1 0 0	KVLDHFRRK	Q9UQE7|SMC3_HUMAN	DB Search	KVLDHFRRK	KVLDHFRRK
1243	HPAAKMIVM	43.16	996.525	9	100	9	-3.8	499.268	2	23.0479	1.4115	0.76	1146313	Neo_sh14_patient1_HLAI_0412_HM1114_tims_Slot1-36_1_3662.d	28189	0.8474	0.8571	0.0178			1	1	0	0			5 16 13 9 4 36 38 11 5	HPAAKMIVM	P50990|TCPQ_HUMAN	DB Search	HPAAKMIVM	HPAAKMIVM
1244	KLYDIDVAK	46.83	1063.59	9	100	9	-0.3	532.803	2	24.5295	-1.2062	0.91	1218319	Neo_sh14_patient1_HLAI_0412_HM1114_tims_Slot1-36_1_3662.d	30427	0.859	0.8687	0.0261	645	14200	1	1	1	1			5 76 37 20 12 7 12 8 5	KLYDIDVAK	P62750|RL23A_HUMAN	DB Search	KLYDIDVAK	KLYDIDVAK
1245	NPHDRVVAL	35.8	1019.55	9	88.9	9	2.1	510.784	2	18.5652	2.8619	0.87	921510	Neo_sh14_patient1_HLAI_0412_HM1114_tims_Slot1-36_1_3662.d	21870	0.8299	0.8396	0.0252	6000	55300	3	3	1	1			5 21 90 21 0 2 4 4 5	NPHDRVVAL	Q15751|HERC1_HUMAN	DB Search	NPHDRVVAL	NPHDRVVAL
1246	KIGDFGLTK	50.5	977.555	9	88.9	9	-2.1	489.784	2	24.5641	0.9726	0.92	1222175	Neo_sh14_patient1_HLAI_0412_HM1114_tims_Slot1-36_1_3662.d	30611	0.8164	0.8261	0.0288			2	2	0	0			5 75 1 2 6 3 10 15 5	KIGDFGLTK	P23458|JAK1_HUMAN:O60674|JAK2_HUMAN	DB Search	KIGDFGLTK	KIGDFGLTK
1247	FPVGRVHRL	32.11	1079.64	9	44.4	9	1.2	540.826	2	18.8746	-3.7128	0.59	934756	Neo_sh14_patient1_HLAI_0412_HM1114_tims_Slot1-36_1_3662.d	22264	0.8819	0.8916	0.0133	30100	325000	9	9	2	2			5 4 2 1 1 2 1 0 0	FPVGRVHRL	P04908|H2A1B_HUMAN:Q99878|H2A1J_HUMAN:Q8IUE6|H2A2B_HUMAN:P16104|H2AX_HUMAN:P0C0S8|H2A1_HUMAN:Q93077|H2A1C_HUMAN:Q96KK5|H2A1H_HUMAN:Q9BTM1|H2AJ_HUMAN:Q7L7L0|H2A3_HUMAN:Q6FI13|H2A2A_HUMAN:Q16777|H2A2C_HUMAN:P20671|H2A1D_HUMAN	DB Search	FPVGRVHRL	FPVGRVHRL
1248	KVFKTDVSK	42.59	1050.61	9	100	9	4.3	526.313	2	8.6069	0.9779	0.79	424991	Neo_sh14_patient1_HLAI_0412_HM1114_tims_Slot1-36_1_3662.d	6383	0.8408	0.8505	0.0344			2	2	0	0			5 11 31 14 2 2 3 3 5	KVFKTDVSK	Q01804|OTUD4_HUMAN	DB Search	KVFKTDVSK	KVFKTDVSK
1249	FADVLVHRL	28	1068.61	9	44.4	9	5.4	535.314	2	39.7421	-1.3337	0.61	1962245	Neo_sh14_patient1_HLAI_0412_HM1114_tims_Slot1-36_1_3662.d	43625	0.8935	0.9032	0.0116			1	1	0	0			5 48 0 0 18 6 0 0 0	FADVLVHRL	Q8IYB7|DI3L2_HUMAN	DB Search	FADVLVHRL	FADVLVHRL
1250	HPLNHSRTL	30.66	1073.57	9	55.6	9	0.3	537.794	2	8.2837	-0.9128	0.79	407898	Neo_sh14_patient1_HLAI_0412_HM1114_tims_Slot1-36_1_3662.d	5814	0.8567	0.8664	0.0285	234	5350	1	1	1	1			5 26 26 10 6 1 0 0 0	HPLNHSRTL	Q86XL3|ANKL2_HUMAN	DB Search	HPLNHSRTL
1251	RVYIGRLSY	24.61	1125.63	9	33.3	9	-9.6	563.817	2	29.919	-0.2383	0.8	1478405	Neo_sh14_patient1_HLAI_0412_HM1114_tims_Slot1-36_1_3662.d	33473	0.8776	0.8873	0.0375			2	2	0	0			5 5 1 1 2 0 0 0 0	RVYIGRLSY	Q13247|SRSF6_HUMAN:Q08170|SRSF4_HUMAN	DB Search	RVYIGRLSY	RVYIGRLSY
1252	IPIHADPRL	35.89	1030.59	9	66.7	9	0.6	516.304	2	28.4811	-4.2404	0.92	1407608	Neo_sh14_patient1_HLAI_0412_HM1114_tims_Slot1-36_1_3662.d	32444	0.8474	0.8571	0.0278			1	1	0	0			5 9 17 15 2 2 0 0 1	IPIHADPRL	O15160|RPAC1_HUMAN	DB Search	IPIHADPRL	IPIHADPRL
1253	VSFPIGIYK	24.38	1022.58	9	77.8	9	6	512.3	2	50.076	-1.4397	0.85	2471966	Neo_sh14_patient1_HLAI_0412_HM1114_tims_Slot1-36_1_3662.d	52118	0.8245	0.8342	0.0406			2	2	0	0			5 37 50 11 11 4 4 0 0	VSFPIGIYK	Q8TCA0|LRC20_HUMAN	DB Search	VSFPIGIYK	VSFPIGIYK
1254	KLHGVNINV	30.86	992.577	9	77.8	9	-0.1	497.296	2	24.062	2.0458	0.83	1197440	Neo_sh14_patient1_HLAI_0412_HM1114_tims_Slot1-36_1_3662.d	29744	0.8144	0.8241	0.0407	11800	126000	2	2	1	1			0 0 2 8 8 21 49 8 5	KLHGVNINV	Q9BQ04|RBM4B_HUMAN:Q9BWF3|RBM4_HUMAN	DB Search	KLHGVNINV	KLHGVNINV
1255	YIDNLLVRV	21.42	1103.63	9	66.7	9	3.1	552.826	2	52.9142	1.7547	0.91	2611313	Neo_sh14_patient1_HLAI_0412_HM1114_tims_Slot1-36_1_3662.d	53765	0.8811	0.8908	0.024			1	1	0	0			5 14 16 3 3 0 0 0 3	YIDNLLVRV	Q7L804|RFIP2_HUMAN:Q6WKZ4|RFIP1_HUMAN	DB Search	YIDNLLVRV	YIDNLLVRV
1256	RMDENYNLL	38.8	1166.54	9	88.9	9	-3.6	584.275	2	38.3026	-0.9002	0.8	1890893	Neo_sh14_patient1_HLAI_0412_HM1114_tims_Slot1-36_1_3662.d	42041	0.88	0.8896	0.0352			1	1	0	0			3 0 2 9 26 90 83 20 5	RMDENYNLL	Q9BQI4|CCDC3_HUMAN	DB Search	RMDENYNLL
1257	TLSNQPLLK	21.4	1012.59	9	55.6	9	9.6	507.308	2	23.9576	0.7956	0.86	1191727	Neo_sh14_patient1_HLAI_0412_HM1114_tims_Slot1-36_1_3662.d	29539	0.8303	0.84	0.0248			1	1	0	0			2 2 7 0 2 1 0 0 2	TLSNQPLLK	Q8N163|CCAR2_HUMAN	DB Search	TLSNQPLLK	TLSNQPLLK
1258	RTNEVVAIKK	52.77	1156.69	10	50	10	2.7	386.573	3	10.1988	1.3281	0.82	504666	Neo_sh14_patient1_HLAI_0412_HM1114_tims_Slot1-36_1_3662.d	8946	0.6698	0.6795	0.0553			4	4	0	0			0 0 0 34 45 43 4 4 0 0	RTNEVVAIKK	Q7L7X3|TAOK1_HUMAN	DB Search	RTNEVVAIKK	RTNEVVAIKK
1259	LPYHEVYTI	30.57	1133.58	9	66.7	9	3	567.797	2	41.03	-4.1519	0.78	2026021	Neo_sh14_patient1_HLAI_0412_HM1114_tims_Slot1-36_1_3662.d	44977	0.8831	0.8928	0.0221			3	3	0	0			5 0 0 0 11 95 23 23 5	LPYHEVYTI	Q9UBG0|MRC2_HUMAN	DB Search	LPYHEVYTI	LPYHEVYTI
1260	SM(+15.99)NANTITK	23.76	994.475	9	22.2	9	1.6	498.246	2	6.0653	-2.2069	0.81	297776	Neo_sh14_patient1_HLAI_0412_HM1114_tims_Slot1-36_1_3662.d	2180	0.8005	0.8102	0.0247			1	1	0	0	Oxidation (M)	M2:Oxidation (M):1000.00	0 0 44 8 0 0 0 0 0	SM(+15.99)NANTITK	O43290|SNUT1_HUMAN	DB Search	SMNANTITK	SMNANTITK
1261	KVLQKKAILK	40.45	1167.81	10	100	10	5	584.914	2	8.3037	-1.7221	0.73	409818	Neo_sh14_patient1_HLAI_0412_HM1114_tims_Slot1-36_1_3662.d	5898	0.918	0.9277	0.0372			2	2	0	0			5 10 17 17 17 11 13 9 9 5	KVLQKKAILK	O00141|SGK1_HUMAN	DB Search	KVLQKKAILK	KVLQKKAILK
1262	IQNPTMINK	36.57	1057.56	9	77.8	9	6.9	529.79	2	20.9358	-2.0162	0.87	1036756	Neo_sh14_patient1_HLAI_0412_HM1114_tims_Slot1-36_1_3662.d	25120	0.8485	0.8582	0.0166	540	4330	1	1	1	1			5 8 94 15 15 20 0 0 2	IQNPTMINK	Q02086|SP2_HUMAN	DB Search	IQNPTMINK	IQNPTMINK
1263	KIAADFRNK	26.81	1061.6	9	55.6	9	2.3	531.808	2	10.3883	1.6926	0.88	514100	Neo_sh14_patient1_HLAI_0412_HM1114_tims_Slot1-36_1_3662.d	9200	0.8675	0.8772	0.0076			1	1	0	0			5 19 17 3 3 0 0 0 1	KIAADFRNK	Q92598|HS105_HUMAN	DB Search	KIAADFRNK	KIAADFRNK
1264	TLAGDVHIV	29.52	923.508	9	66.7	9	-14.6	462.754	2	37.7345	1.3347	0.87	1862754	Neo_sh14_patient1_HLAI_0412_HM1114_tims_Slot1-36_1_3662.d	41442	0.8117	0.8214	0.0034			2	2	0	0			5 7 18 16 5 5 0 0 0	TLAGDVHIV	Q9UBQ0|VPS29_HUMAN	DB Search	TLAGDVHIV	TLAGDVHIV
1265	VVYWLYMKK	45.17	1228.67	9	55.6	9	-3.4	615.339	2	41.1056	0.3898	0.74	2029757	Neo_sh14_patient1_HLAI_0412_HM1114_tims_Slot1-36_1_3662.d	45041	0.9397	0.9494	0.0254			1	1	0	0			0 0 41 71 38 26 11 0 0	VVYWLYMKK	Q13740|CD166_HUMAN	DB Search	VVYWLYMKK	VVYWLYMKK
1266	ILYKKTLWY	26.44	1226.71	9	66.7	9	2.2	614.362	2	37.6966	0.3158	0.69	1860865	Neo_sh14_patient1_HLAI_0412_HM1114_tims_Slot1-36_1_3662.d	41389	0.9533	0.963	0.0118			2	2	0	0			5 59 99 0 0 0 39 25 5	ILYKKTLWY	Q9H799|CPLN1_HUMAN	DB Search	ILYKKTLWY	ILYKKTLWY
1267	RILFFNTPK	42.07	1134.65	9	66.7	9	-4.2	568.332	2	40.2433	2.9963	0.52	1986629	Neo_sh14_patient1_HLAI_0412_HM1114_tims_Slot1-36_1_3662.d	44141	0.9091	0.9188	0.0161	498	8380	2	2	1	1			0 0 0 4 37 56 5 4 5	RILFFNTPK	P48556|PSMD8_HUMAN	DB Search	RILFFNTPK	RILFFNTPK
1268	RVAHLALKH	28.52	1043.64	9	22.2	9	-3	348.885	3	8.2279	-0.8432	0.85	406010	Neo_sh14_patient1_HLAI_0412_HM1114_tims_Slot1-36_1_3662.d	5762	0.6752	0.6849	0.0299			1	1	0	0			0 0 0 55 0 16 0 0 0	RVAHLALKH	P55036|PSMD4_HUMAN	DB Search	RVAHLALKH	RVAHLALKH
1269	IQNDRQLQY	43.04	1176.59	9	100	9	1.3	589.302	2	19.6077	-0.8396	0.81	972536	Neo_sh14_patient1_HLAI_0412_HM1114_tims_Slot1-36_1_3662.d	23324	0.8633	0.873	0.0519	2130	34000	2	2	1	1			5 38 12 9 4 16 34 25 5	IQNDRQLQY	Q9UBB9|TFP11_HUMAN	DB Search	IQNDRQLQY	IQNDRQLQY
1270	RTLNPQMLQK	34.05	1227.68	10	40	10	-0.5	614.845	2	20.2447	2.2438	0.62	1006601	Neo_sh14_patient1_HLAI_0412_HM1114_tims_Slot1-36_1_3662.d	24341	0.9063	0.916	0.0388	117	1690	2	2	1	1			2 2 0 0 0 0 16 21 1 1	RTLNPQMLQK	Q9NVU7|SDA1_HUMAN	DB Search	RTLNPQMLQK	RTLNPQMLQK
1271	TAYNLVHEL	34.33	1058.54	9	77.8	9	2	530.278	2	40.5377	-2.0147	0.78	2001644	Neo_sh14_patient1_HLAI_0412_HM1114_tims_Slot1-36_1_3662.d	44468	0.8532	0.8629	0.022			2	2	0	0			5 12 57 13 13 24 8 0 0	TAYNLVHEL	Q7Z392|TPC11_HUMAN	DB Search	TAYNLVHEL	TAYNLVHEL
1272	ATFYGPVKK	36.24	1009.56	9	55.6	9	4.7	505.789	2	16.4174	-9.5191	0.9	815503	Neo_sh14_patient1_HLAI_0412_HM1114_tims_Slot1-36_1_3662.d	18679	0.8745	0.8842	-0.0094			1	1	0	0			5 8 51 67 28 0 0 0 0	ATFYGPVKK	Q13618|CUL3_HUMAN	DB Search	ATFYGPVKK	ATFYGPVKK
1273	VLYAKVHMK	46.46	1087.62	9	77.8	9	1.5	544.819	2	15.3056	-1.3503	0.72	758840	Neo_sh14_patient1_HLAI_0412_HM1114_tims_Slot1-36_1_3662.d	17096	0.8928	0.9025	0.0224	321	5850	2	2	1	1			5 37 16 16 21 19 10 0 0	VLYAKVHMK	Q8N9N2|ASCC1_HUMAN	DB Search	VLYAKVHMK	VLYAKVHMK
1274	FLHEATVRL	45.33	1084.6	9	44.4	9	12	543.315	2	32.3412	3.305	0.67	1597973	Neo_sh14_patient1_HLAI_0412_HM1114_tims_Slot1-36_1_3662.d	35537	0.8621	0.8718	0.043			1	1	0	0			0 0 64 35 5 3 0 0 0	FLHEATVRL	Q12772|SRBP2_HUMAN	DB Search	FLHEATVRL	FLHEATVRL
1275	GLIDRQVTV	31.88	999.571	9	66.7	9	3.2	500.795	2	35.7725	0.5881	0.84	1764936	Neo_sh14_patient1_HLAI_0412_HM1114_tims_Slot1-36_1_3662.d	39096	0.8427	0.8524	0.0124	1410	23000	3	3	1	1			0 0 63 13 0 25 55 14 5	GLIDRQVTV	Q9UPN3|MACF1_HUMAN	DB Search	GLIDRQVTV	GLIDRQVTV
1276	IPVSSHNSL	23.2	952.498	9	33.3	9	2.2	477.257	2	20.093	1.117	0.74	999051	Neo_sh14_patient1_HLAI_0412_HM1114_tims_Slot1-36_1_3662.d	24135	0.804	0.8137	0.0112			1	1	0	0			5 45 45 0 0 0 0 0 0	IPVSSHNSL	Q06413|MEF2C_HUMAN	DB Search	IPVSSHNSL	IPVSSHNSL
1277	HPFVDSNLL	28.6	1040.53	9	77.8	9	1.7	521.273	2	45.4206	-1.7825	0.91	2242542	Neo_sh14_patient1_HLAI_0412_HM1114_tims_Slot1-36_1_3662.d	48522	0.8338	0.8435	0.0413			1	1	0	0			0 0 4 4 15 18 18 8 5	HPFVDSNLL	Q8TB45|DPTOR_HUMAN	DB Search	HPFVDSNLL	HPFVDSNLL
1278	GSYESTLKK	39.05	1011.52	9	55.6	9	7.5	506.773	2	9.9713	-5.5506	0.94	493264	Neo_sh14_patient1_HLAI_0412_HM1114_tims_Slot1-36_1_3662.d	8560	0.8183	0.828	0.0368			1	1	0	0			0 0 51 73 14 2 2 0 0	GSYESTLKK	Q6ZSC3|RBM43_HUMAN	DB Search	GSYESTLKK	GSYESTLKK
1279	RLKAQMIEK	42.88	1115.65	9	44.4	9	6	372.892	3	11.1471	-0.1088	0.68	552192	Neo_sh14_patient1_HLAI_0412_HM1114_tims_Slot1-36_1_3662.d	10572	0.7096	0.7193	0.0156	953	17000	2	2	1	1			1 0 0 30 45 92 27 0 0	RLKAQMIEK	Q13813|SPTN1_HUMAN	DB Search	RLKAQMIEK	RLKAQMIEK
1280	RLTPKLM(+15.99)EV	24.69	1101.62	9	44.4	9	-0.5	551.818	2	22.4035	1.862	0.85	1114172	Neo_sh14_patient1_HLAI_0412_HM1114_tims_Slot1-36_1_3662.d	27260	0.88	0.8896	0.0252			2	2	0	0	Oxidation (M)	M7:Oxidation (M):1000.00	0 0 0 8 3 98 5 0 0	RLTPKLM(+15.99)EV	O15372|EIF3H_HUMAN	DB Search	RLTPKLMEV	RLTPKLMEV
1281	HPLTQSAVM(+15.99)	24.47	998.486	9	55.6	9	-1.3	500.249	2	14.3342	-2.0758	0.77	711517	Neo_sh14_patient1_HLAI_0412_HM1114_tims_Slot1-36_1_3662.d	15673	0.8021	0.8117	0.0331			1	1	0	0	Oxidation (M)	M9:Oxidation (M):1000.00	0 0 0 0 30 31 39 89 5	HPLTQSAVM(+15.99)	Q9BQA9|CYBC1_HUMAN	DB Search	HPLTQSAVM	HPLTQSAVM
1282	KLGDLFFRV	33.35	1093.63	9	55.6	9	0.2	547.822	2	53.1034	4.1589	0.9	2620588	Neo_sh14_patient1_HLAI_0412_HM1114_tims_Slot1-36_1_3662.d	53860	0.89	0.8997	0.0151			1	1	0	0			5 69 1 1 16 2 2 0 0	KLGDLFFRV	Q70EL1|UBP54_HUMAN	DB Search	KLGDLFFRV	KLGDLFFRV
1283	SLNQAVVSK	30.43	944.529	9	55.6	9	-1.5	473.271	2	15.3951	0.5536	0.87	764531	Neo_sh14_patient1_HLAI_0412_HM1114_tims_Slot1-36_1_3662.d	17279	0.7881	0.7978	0.037			2	2	0	0			0 0 36 28 8 8 5 0 0	SLNQAVVSK	P61201|CSN2_HUMAN	DB Search	SLNQAVVSK	SLNQAVVSK
1284	GLM(+15.99)DTVKKV	15.39	1005.55	9	33.3	9	-1.1	503.783	2	18.8004	1.0773	0.79	932867	Neo_sh14_patient1_HLAI_0412_HM1114_tims_Slot1-36_1_3662.d	22211	0.8241	0.8338	0.041	135	2580	1	1	1	1	Oxidation (M)	M3:Oxidation (M):1000.00	0 0 91 0 0 16 16 0 0	GLM(+15.99)DTVKKV	Q9Y692|GMEB1_HUMAN	DB Search	GLMDTVKKV	GLMDTVKKV
1285	HPSFPEVSF	17.26	1045.49	9	33.3	9	7.5	523.755	2	48.4481	-0.3893	0.86	2391849	Neo_sh14_patient1_HLAI_0412_HM1114_tims_Slot1-36_1_3662.d	50949	0.7877	0.7974	0.0774			1	1	0	0			0 0 0 0 0 0 55 7 5	HPSFPEVSF	P06213|INSR_HUMAN	DB Search	HPSFPEVSF	HPSFPEVSF
1286	HPESTPKSL	37.29	994.508	9	55.6	9	10.5	498.267	2	10.6159	-0.513	0.74	525543	Neo_sh14_patient1_HLAI_0412_HM1114_tims_Slot1-36_1_3662.d	9627	0.8013	0.811	0.0439			2	2	0	0			5 16 7 7 16 0 0 0 0	HPESTPKSL	Q8N3F8|MILK1_HUMAN	DB Search	HPESTPKSL	HPESTPKSL
1287	FAYDGKDYLTL	21.45	1304.63	11	18.2	11	-4.1	653.319	2	52.4601	-0.1166	0.6	2589001	Neo_sh14_patient1_HLAI_0412_HM1114_tims_Slot1-36_1_3662.d	53485	0.9502	0.9599	0.0349			1	1	0	0			0 0 30 0 0 0 0 33 0 0 0	FAYDGKDYLTL	P13747|HLAE_HUMAN	DB Search	FAYDGKDYLTL	FAYDGKDYLTL
1288	FIHNSHTAY	30.33	1088.5	9	66.7	9	-6.7	545.256	2	12.9692	2.561	0.71	643346	Neo_sh14_patient1_HLAI_0412_HM1114_tims_Slot1-36_1_3662.d	13598	0.8462	0.8559	0.0289			1	1	0	0			0 0 36 36 0 26 35 16 5	FIHNSHTAY	Q53EP0|FND3B_HUMAN	DB Search	FIHNSHTAY	FIHNSHTAY
1289	SVRGVSISK	34.82	931.545	9	66.7	9	5.5	466.782	2	12.21	0.1136	0.74	605436	Neo_sh14_patient1_HLAI_0412_HM1114_tims_Slot1-36_1_3662.d	12408	0.7935	0.8032	0.0416			1	1	0	0			0 0 13 0 5 17 61 49 5	SVRGVSISK	Q99683|M3K5_HUMAN	DB Search	SVRGVSISK	SVRGVSISK
1290	GVHGGLINK	46.35	893.508	9	77.8	9	-1.2	447.761	2	10.9049	-1.3085	0.8	536967	Neo_sh14_patient1_HLAI_0412_HM1114_tims_Slot1-36_1_3662.d	10035	0.7858	0.7955	0.0194	449000	4040000	7	7	1	1			0 0 78 13 12 38 46 11 5	GVHGGLINK	P07737|PROF1_HUMAN	DB Search	GVHGGLINK	GVHGGLINK
1291	FAHSFIEL	21.21	962.486	8	62.5	8	3.3	482.252	2	50.1896	-0.1118	0.82	2477547	Neo_sh14_patient1_HLAI_0412_HM1114_tims_Slot1-36_1_3662.d	52191	0.8226	0.8323	0.0126			1	1	0	0			0 0 0 16 35 58 14 5	FAHSFIEL	Q9UGR2|Z3H7B_HUMAN	DB Search	FAHSFIEL	FAHSFIEL
1292	KLTELLVKA	34.26	1013.65	9	77.8	9	9.2	507.836	2	32.682	-0.7897	0.73	1614842	Neo_sh14_patient1_HLAI_0412_HM1114_tims_Slot1-36_1_3662.d	35882	0.8501	0.8598	0.0251			2	2	0	0			5 9 5 5 14 14 38 0 0	KLTELLVKA	O95470|SGPL1_HUMAN	DB Search	KLTELLVKA	KLTELLVKA
1293	NPDDVFREF	44.33	1137.51	9	77.8	9	0.3	569.762	2	47.2214	-0.4966	0.83	2328446	Neo_sh14_patient1_HLAI_0412_HM1114_tims_Slot1-36_1_3662.d	49970	0.8555	0.8652	0.0296	5340	33400	2	2	1	1			5 47 49 46 46 24 0 0 3	NPDDVFREF	O75190|DNJB6_HUMAN	DB Search	NPDDVFREF	NPDDVFREF
1294	ATTLPIRNK	44.22	1012.6	9	66.7	9	1.8	507.31	2	15.2449	2.387	0.95	755044	Neo_sh14_patient1_HLAI_0412_HM1114_tims_Slot1-36_1_3662.d	16972	0.8478	0.8575	0.0074	15800	136000	2	2	1	1			2 2 25 25 5 2 0 0 1	ATTLPIRNK	O75179|ANR17_HUMAN	DB Search	ATTLPIRNK	ATTLPIRNK
1295	MPHSYPYVAL	30.9	1176.56	10	40	10	6	589.293	2	45.4584	0.1506	0.83	2244398	Neo_sh14_patient1_HLAI_0412_HM1114_tims_Slot1-36_1_3662.d	48542	0.9079	0.9176	0.0073			2	2	0	0			0 0 0 0 26 47 47 39 0 0	MPHSYPYVAL	Q9UIY3|RWD2A_HUMAN	DB Search	MPHSYPYVAL	MPHSYPYVAL
1296	LPNHRVLIM	40.7	1091.63	9	88.9	9	5.3	546.824	2	29.8811	-2.6372	0.7	1476540	Neo_sh14_patient1_HLAI_0412_HM1114_tims_Slot1-36_1_3662.d	33444	0.8706	0.8803	0.0245			2	2	0	0			5 96 36 36 0 12 23 9 5	LPNHRVLIM	Q96IU4|ABHEB_HUMAN	DB Search	LPNHRVLIM	LPNHRVLIM
1297	HPTDVDYRV	29.47	1100.53	9	66.7	9	2	551.271	2	18.0876	-0.2563	0.82	896975	Neo_sh14_patient1_HLAI_0412_HM1114_tims_Slot1-36_1_3662.d	21203	0.8602	0.8699	0.035	934	13400	2	2	1	1			5 85 23 23 8 8 0 0 0	HPTDVDYRV	O00541|PESC_HUMAN	DB Search	HPTDVDYRV	HPTDVDYRV
1298	GQYSRALKH	51.25	1058.56	9	66.7	9	-0.8	530.288	2	6.0653	-7.3098	0.89	297789	Neo_sh14_patient1_HLAI_0412_HM1114_tims_Slot1-36_1_3662.d	2193	0.8637	0.8734	0.0215			1	1	0	0			0 0 10 6 1 7 7 29 5	GQYSRALKH	Q8NEZ3|WDR19_HUMAN	DB Search	GQYSRALKH	GQYSRALKH
1299	RIFPKEM(+15.99)LK	13.1	1176.67	9	44.4	9	4.6	589.344	2	16.4174	-0.9096	0.82	815489	Neo_sh14_patient1_HLAI_0412_HM1114_tims_Slot1-36_1_3662.d	18665	0.9013	0.911	0.0339			1	1	0	0	Oxidation (M)	M7:Oxidation (M):1000.00	0 0 0 0 0 9 2 2 3	RIFPKEM(+15.99)LK	P21281|VATB2_HUMAN:P15313|VATB1_HUMAN	DB Search	RIFPKEMLK	RIFPKEMLK
1300	FLQEKSPAV	42.54	1017.55	9	77.8	9	2.8	509.783	2	24.4882	0.8967	0.56	1218336	Neo_sh14_patient1_HLAI_0412_HM1114_tims_Slot1-36_1_3662.d	30444	0.8206	0.8303	0.0345			2	2	0	0			0 0 65 8 14 14 13 13 5	FLQEKSPAV	Q14157|UBP2L_HUMAN	DB Search	FLQEKSPAV	FLQEKSPAV
1301	KLDPKTMKV	39.66	1058.62	9	100	9	5.6	530.318	2	17.2131	2.3716	0.71	855279	Neo_sh14_patient1_HLAI_0412_HM1114_tims_Slot1-36_1_3662.d	19899	0.8567	0.8664	0.0285			1	1	0	0			5 18 80 17 14 8 8 49 5	KLDPKTMKV	Q8IX12|CCAR1_HUMAN	DB Search	KLDPKTMKV	KLDPKTMKV
1302	FPAVHAAEM	20.96	971.453	9	66.7	9	18	486.743	2	33.5155	-0.3	0.77	1656092	Neo_sh14_patient1_HLAI_0412_HM1114_tims_Slot1-36_1_3662.d	36740	0.7943	0.804	0.0308			2	2	0	0			5 34 19 19 0 0 0 7 5	FPAVHAAEM	Q6PID6|TTC33_HUMAN	DB Search	FPAVHAAEM
1303	FVDEGIKTL	26.14	1020.55	9	55.6	9	1	511.282	2	37.583	-1.8852	0.76	1855235	Neo_sh14_patient1_HLAI_0412_HM1114_tims_Slot1-36_1_3662.d	41267	0.8338	0.8435	0.0213			2	2	0	0			5 74 47 18 0 0 0 0 5	FVDEGIKTL	P06746|DPOLB_HUMAN	DB Search	FVDEGIKTL	FVDEGIKTL
1304	SIFKQPVTK	46.11	1046.61	9	77.8	9	-1.4	524.313	2	18.7584	0.3204	0.82	929094	Neo_sh14_patient1_HLAI_0412_HM1114_tims_Slot1-36_1_3662.d	22110	0.8451	0.8547	0.0401	2910	33100	1	1	1	1			0 0 25 25 25 8 7 4 4	SIFKQPVTK	O95983|MBD3_HUMAN:Q9UBB5|MBD2_HUMAN	DB Search	SIFKQPVTK	SIFKQPVTK
1305	RMLDHLTKK	44.7	1140.64	9	33.3	9	0.8	381.222	3	10.3125	-0.7911	0.89	510317	Neo_sh14_patient1_HLAI_0412_HM1114_tims_Slot1-36_1_3662.d	9089	0.6849	0.6945	0.0403			3	3	0	0			1 0 0 0 49 15 5 0 0	RMLDHLTKK	Q13136|LIPA1_HUMAN:O75335|LIPA4_HUMAN:O75334|LIPA2_HUMAN	DB Search	RMLDHLTKK	RMLDHLTKK
1306	ILDKIVQKV	24.46	1054.67	9	33.3	9	-7.3	528.341	2	33.0609	-4.0522	0.64	1633581	Neo_sh14_patient1_HLAI_0412_HM1114_tims_Slot1-36_1_3662.d	36261	0.8613	0.871	0.0438			1	1	0	0			0 0 0 0 6 13 13 0 0	ILDKIVQKV	Q8TCJ0|FBX25_HUMAN	DB Search	ILDKIVQKV	ILDKIVQKV
1307	VAKGPSHSL	31.15	894.492	9	66.7	9	5.7	448.256	2	8.3088	-3.3215	0.9	407909	Neo_sh14_patient1_HLAI_0412_HM1114_tims_Slot1-36_1_3662.d	5825	0.7796	0.7893	0.0256	190	3470	1	1	1	1			5 33 40 14 3 3 0 0 0	VAKGPSHSL	Q8WV48|CC107_HUMAN	DB Search	VAKGPSHSL	VAKGPSHSL
1308	LPDKSIASL	35.01	942.539	9	77.8	9	-0.5	472.276	2	35.1958	-2.0065	0.66	1736799	Neo_sh14_patient1_HLAI_0412_HM1114_tims_Slot1-36_1_3662.d	38499	0.7916	0.8013	0.0336	903	11000	2	2	1	1			5 30 10 0 1 4 4 14 5	LPDKSIASL	Q9UKL0|RCOR1_HUMAN	DB Search	LPDKSIASL	LPDKSIASL
1309	SAHDQSLVL	34.4	968.493	9	66.7	9	2.9	485.255	2	24.6021	-0.5811	0.86	1224083	Neo_sh14_patient1_HLAI_0412_HM1114_tims_Slot1-36_1_3662.d	30683	0.8342	0.8439	0.0009			1	1	0	0			0 0 0 6 23 42 54 13 5	SAHDQSLVL	P12111|CO6A3_HUMAN	DB Search	SAHDQSLVL	SAHDQSLVL
1310	QIYNPPSGK	32.93	1002.51	9	66.7	9	3.4	502.266	2	16.2999	-1.701	0.91	804186	Neo_sh14_patient1_HLAI_0412_HM1114_tims_Slot1-36_1_3662.d	18378	0.8117	0.8214	0.0334	681	5060	1	1	1	1			5 7 30 30 26 8 0 0 0	QIYNPPSGK	Q9BZZ5|API5_HUMAN	DB Search	QIYNPPSGK	QIYNPPSGK
1311	HPAELYRAL	35.88	1068.57	9	66.7	9	-5	535.29	2	24.3365	-3.5019	0.87	1210659	Neo_sh14_patient1_HLAI_0412_HM1114_tims_Slot1-36_1_3662.d	30111	0.8687	0.8784	0.0264			2	2	0	0			5 52 48 19 8 3 0 0 0	HPAELYRAL	Q7Z6J2|GRASP_HUMAN	DB Search	HPAELYRAL
1312	SPIKDQPVM	35.58	1013.52	9	55.6	9	-3.2	507.766	2	22.631	-3.0549	0.8	1125509	Neo_sh14_patient1_HLAI_0412_HM1114_tims_Slot1-36_1_3662.d	27581	0.8137	0.8234	0.0215			1	1	0	0			0 0 11 5 6 6 0 0 4	SPIKDQPVM	Q9HB96|FANCE_HUMAN	DB Search	SPIKDQPVM	SPIKDQPVM
1313	FAKPGTEQY	26.77	1039.5	9	77.8	9	13.4	520.763	2	18.5773	-2.9996	0.82	923428	Neo_sh14_patient1_HLAI_0412_HM1114_tims_Slot1-36_1_3662.d	21952	0.811	0.8206	0.0542			1	1	0	0			5 46 72 3 0 1 36 52 5	FAKPGTEQY	Q9Y5X1|SNX9_HUMAN	DB Search	FAKPGTEQY	FAKPGTEQY
1314	FAEGSTLKL	22.21	964.523	9	66.7	9	-1.6	483.268	2	36.9004	1.9458	0.78	1821359	Neo_sh14_patient1_HLAI_0412_HM1114_tims_Slot1-36_1_3662.d	40439	0.8032	0.8129	0.0219			4	4	0	0			5 61 48 9 8 8 0 0 0	FAEGSTLKL	Q9H3U1|UN45A_HUMAN	DB Search	FAEGSTLKL
1315	QPIGHPDAL	20.49	946.487	9	66.7	9	4.1	474.253	2	22.3277	2.071	0.72	1110350	Neo_sh14_patient1_HLAI_0412_HM1114_tims_Slot1-36_1_3662.d	27110	0.8059	0.8156	0.0292			1	1	0	0			5 6 18 17 17 0 0 0 4	QPIGHPDAL	A0A3B3IS91|PLGRF_HUMAN	DB Search	QPIGHPDAL
1316	KVFDINLKEK	38.04	1232.71	10	60	10	2.2	617.365	2	24.3744	-1.6128	0.71	1212574	Neo_sh14_patient1_HLAI_0412_HM1114_tims_Slot1-36_1_3662.d	30190	0.9355	0.9452	0.0197			1	1	0	0			3 3 19 6 15 0 0 9 0 0	KVFDINLKEK	P41218|MNDA_HUMAN	DB Search	KVFDINLKEK	KVFDINLKEK
1317	FQDENHLYL	26.22	1177.54	9	66.7	9	-5.5	589.774	2	39.0604	0.744	0.55	1928473	Neo_sh14_patient1_HLAI_0412_HM1114_tims_Slot1-36_1_3662.d	42901	0.8974	0.9071	0.0177			1	1	0	0			5 16 12 12 17 11 0 0 0	FQDENHLYL	Q9Y5S2|MRCKB_HUMAN	DB Search	FQDENHLYL
1318	RTASFAVRK	48.89	1034.6	9	77.8	9	-1	345.873	3	8.6069	1.1991	0.86	424964	Neo_sh14_patient1_HLAI_0412_HM1114_tims_Slot1-36_1_3662.d	6356	0.6602	0.6698	0.035	262	5920	2	2	1	1			2 2 2 19 48 52 4 0 0	RTASFAVRK	Q9Y512|SAM50_HUMAN	DB Search	RTASFAVRK	RTASFAVRK
1319	LM(+15.99)DHTIPEV	32.89	1069.51	9	55.6	9	1.9	535.764	2	31.6979	-1.0236	0.8	1566195	Neo_sh14_patient1_HLAI_0412_HM1114_tims_Slot1-36_1_3662.d	34971	0.8497	0.8594	0.0154			3	3	0	0	Oxidation (M)	M2:Oxidation (M):1000.00	4 4 0 0 55 60 0 0 5	LM(+15.99)DHTIPEV	O00560|SDCB1_HUMAN	DB Search	LMDHTIPEV	LMDHTIPEV
1320	SVHWFPVQK	42.14	1126.59	9	44.4	9	5.1	564.306	2	32.4548	-2.2208	0.8	1603598	Neo_sh14_patient1_HLAI_0412_HM1114_tims_Slot1-36_1_3662.d	35654	0.8714	0.8811	0.0237			3	3	0	0			0 0 0 58 70 14 14 0 0	SVHWFPVQK	Q9UH36|SRR1L_HUMAN	DB Search	SVHWFPVQK	SVHWFPVQK
1321	IPASKVFSL	29.75	960.564	9	100	9	-2.2	481.288	2	45.3071	0.2092	0.72	2236937	Neo_sh14_patient1_HLAI_0412_HM1114_tims_Slot1-36_1_3662.d	48425	0.8175	0.8272	0.0276			1	1	0	0			5 74 33 11 11 5 5 3 5	IPASKVFSL	Q9NR48|ASH1L_HUMAN	DB Search	IPASKVFSL	IPASKVFSL
1322	YPRTLDVVL	25.26	1074.61	9	44.4	9	1.9	538.312	2	49.0046	-0.6176	0.86	2416088	Neo_sh14_patient1_HLAI_0412_HM1114_tims_Slot1-36_1_3662.d	51320	0.8637	0.8734	0.0315	367	4420	1	1	1	1			2 1 0 0 0 1 58 7 5	YPRTLDVVL	Q9H583|HEAT1_HUMAN	DB Search	YPRTLDVVL	YPRTLDVVL
1323	SLPKGVVEV	26.09	926.544	9	55.6	9	4.8	464.281	2	34.4752	-2.9503	0.88	1701138	Neo_sh14_patient1_HLAI_0412_HM1114_tims_Slot1-36_1_3662.d	37722	0.7842	0.7939	0.0509			1	1	0	0			0 0 11 2 0 0 32 13 5	SLPKGVVEV	P50454|SERPH_HUMAN	DB Search	SLPKGVVEV	SLPKGVVEV
1324	VPIRVVQVL	24.05	1021.66	9	77.8	9	-1.1	511.839	2	49.2051	-0.3457	0.79	2429124	Neo_sh14_patient1_HLAI_0412_HM1114_tims_Slot1-36_1_3662.d	51504	0.8377	0.8474	0.0375			1	1	0	0			5 15 1 0 8 28 28 3 3	VPIRVVQVL	Q9HAB3|S52A2_HUMAN	DB Search	VPIRVVQVL	VPIRVVQVL
1325	TPAPIRQIL	30.28	1007.61	9	55.6	9	-2.5	504.812	2	40.6134	-2.7044	0.85	2005391	Neo_sh14_patient1_HLAI_0412_HM1114_tims_Slot1-36_1_3662.d	44543	0.8222	0.8319	0.033			1	1	0	0			5 10 85 7 7 0 0 0 0	TPAPIRQIL	Q9C000|NLRP1_HUMAN	DB Search	TPAPIRQIL	TPAPIRQIL
1326	HPADKDYGL	41.17	1014.48	9	100	9	5.2	508.248	2	14.7984	-2.6197	0.68	730473	Neo_sh14_patient1_HLAI_0412_HM1114_tims_Slot1-36_1_3662.d	16269	0.8416	0.8513	0.0236	3480	25300	2	2	1	1			5 32 32 6 5 11 9 6 5	HPADKDYGL	P41236|IPP2_HUMAN	DB Search	HPADKDYGL	HPADKDYGL
1327	RLTESLRSK	43.84	1088.63	9	55.6	9	3.5	363.885	3	8.4174	0.2693	0.76	415497	Neo_sh14_patient1_HLAI_0412_HM1114_tims_Slot1-36_1_3662.d	6069	0.6768	0.6864	0.0284			2	2	0	0			0 0 6 25 33 12 0 0 5	RLTESLRSK	O15155|BET1_HUMAN	DB Search	RLTESLRSK	RLTESLRSK
1328	QVYRSVLIK	28.15	1104.67	9	88.9	9	6.3	553.344	2	21.987	-1.6858	0.87	1093422	Neo_sh14_patient1_HLAI_0412_HM1114_tims_Slot1-36_1_3662.d	26706	0.8757	0.8854	0.0495			1	1	0	0			5 12 2 2 0 8 44 26 5	QVYRSVLIK	Q08999|RBL2_HUMAN	DB Search	QVYRSVLIK	QVYRSVLIK
1329	RFDSDVGEF	28.11	1070.47	9	44.4	9	8.7	536.245	2	34.4373	-3.7457	0.85	1699264	Neo_sh14_patient1_HLAI_0412_HM1114_tims_Slot1-36_1_3662.d	37684	0.8369	0.8466	0.0282			3	3	0	0			0 0 0 0 0 36 36 78 5	RFDSDVGEF	P01911|DRB1_HUMAN:P04440|DPB1_HUMAN:P05538|DQB2_HUMAN	DB Search	RFDSDVGEF	RFDSDVGEF
1330	RLKSIKNIQK	32.26	1226.78	10	60	10	-11.3	409.93	3	7.5454	-1.4004	0.51	371859	Neo_sh14_patient1_HLAI_0412_HM1114_tims_Slot1-36_1_3662.d	4659	0.7336	0.7432	0.0216			1	1	0	0			0 0 3 7 7 36 28 23 0 0	RLKSIKNIQK	P36542|ATPG_HUMAN	DB Search	RLKSIKNIQK	RLKSIKNIQK
1331	RLKEAYSVK	43.47	1092.63	9	55.6	9	-3.9	365.216	3	9.2892	-0.2591	0.58	459141	Neo_sh14_patient1_HLAI_0412_HM1114_tims_Slot1-36_1_3662.d	7485	0.7038	0.7135	0.0214	2620	50600	5	5	1	1			0 0 3 49 70 70 21 0 0	RLKEAYSVK	Q6P2Q9|PRP8_HUMAN	DB Search	RLKEAYSVK	RLKEAYSVK
1332	DPGEHHFTL	33.24	1051.47	9	77.8	9	1.6	526.744	2	24.0416	2.0253	0.69	1195554	Neo_sh14_patient1_HLAI_0412_HM1114_tims_Slot1-36_1_3662.d	29694	0.8458	0.8555	-0.0107	346	4740	1	1	1	1			0 0 9 9 11 26 12 12 5	DPGEHHFTL	P54803|GALC_HUMAN	DB Search	DPGEHHFTL
1333	VTDHNLHEL	40.83	1076.53	9	77.8	9	5.5	539.273	2	16.5983	-1.2171	0.77	821132	Neo_sh14_patient1_HLAI_0412_HM1114_tims_Slot1-36_1_3662.d	18800	0.8788	0.8885	-0.0136	1280	17300	1	1	1	1			5 77 44 37 14 61 10 0 0	VTDHNLHEL	Q9NV31|IMP3_HUMAN	DB Search	VTDHNLHEL	VTDHNLHEL
1334	ALNKEIMILK	45.07	1171.7	10	60	10	-1.1	586.857	2	35.6124	-1.7685	0.78	1757426	Neo_sh14_patient1_HLAI_0412_HM1114_tims_Slot1-36_1_3662.d	38930	0.9106	0.9203	0.0445			1	1	0	0			0 0 62 62 7 29 70 66 0 0	ALNKEIMILK	Q5VT25|MRCKA_HUMAN	DB Search	ALNKEIMILK	ALNKEIMILK
1335	HLANTYISV	24.66	1016.53	9	55.6	9	12.7	509.278	2	36.1807	-0.3529	0.89	1785630	Neo_sh14_patient1_HLAI_0412_HM1114_tims_Slot1-36_1_3662.d	39594	0.8164	0.8261	0.0488			1	1	0	0			0 0 0 0 28 61 38 8 5	HLANTYISV	Q9UEY8|ADDG_HUMAN	DB Search	HLANTYISV	HLANTYISV
1336	FVVEHDFIM	34.51	1135.54	9	77.8	9	-6.6	568.772	2	52.4601	0.9799	0.66	2589013	Neo_sh14_patient1_HLAI_0412_HM1114_tims_Slot1-36_1_3662.d	53497	0.8706	0.8803	0.0245			1	1	0	0			0 0 14 14 2 21 36 8 5	FVVEHDFIM	P61221|ABCE1_HUMAN	DB Search	FVVEHDFIM
1337	KIREYEQTLK	31.19	1306.72	10	60	10	6.4	654.374	2	12.6088	-1.0759	0.66	622544	Neo_sh14_patient1_HLAI_0412_HM1114_tims_Slot1-36_1_3662.d	12992	0.9455	0.9553	0.0396	725	9700	2	2	1	1			2 1 1 1 1 4 4 5 3 3	KIREYEQTLK	Q13948|CASP_HUMAN:P39880|CUX1_HUMAN	DB Search	KIREYEQTLK	KIREYEQTLK
1338	IVALILSTK	32.92	956.627	9	77.8	9	0.8	479.321	2	46.5021	2.0835	0.92	2292972	Neo_sh14_patient1_HLAI_0412_HM1114_tims_Slot1-36_1_3662.d	49380	0.8218	0.8315	0.0133	2920	31300	3	3	1	1			5 29 24 18 18 9 3 0 0	IVALILSTK	P27449|VATL_HUMAN	DB Search	IVALILSTK	IVALILSTK
1339	HVDFPVGNK	32.09	1011.51	9	55.6	9	10.1	506.769	2	20.3584	0.2946	0.58	1012227	Neo_sh14_patient1_HLAI_0412_HM1114_tims_Slot1-36_1_3662.d	24459	0.8156	0.8253	0.0395			1	1	0	0			5 47 31 31 7 0 0 0 0	HVDFPVGNK	Q7L622|G2E3_HUMAN	DB Search	HVDFPVGNK	HVDFPVGNK
1340	GLNNKTIGY	35.66	978.513	9	77.8	9	0.1	490.264	2	21.6726	-1.2794	0.6	1076421	Neo_sh14_patient1_HLAI_0412_HM1114_tims_Slot1-36_1_3662.d	26229	0.8206	0.8303	0.0145	1700	28700	1	1	1	1			0 0 59 29 23 34 20 20 5	GLNNKTIGY	Q8TE76|MORC4_HUMAN	DB Search	GLNNKTIGY	GLNNKTIGY
1341	KASEVFLQR	44.62	1076.6	9	66.7	9	2.4	539.308	2	18.4257	-0.0123	0.79	915829	Neo_sh14_patient1_HLAI_0412_HM1114_tims_Slot1-36_1_3662.d	21697	0.8497	0.8594	0.0354			1	1	0	0			5 76 22 22 26 5 1 0 0	KASEVFLQR	Q9H0A0|NAT10_HUMAN	DB Search	KASEVFLQR	KASEVFLQR
1342	IADPFFRSA	19.4	1022.52	9	55.6	9	0.6	512.267	2	42.2036	-0.7994	0.93	2084120	Neo_sh14_patient1_HLAI_0412_HM1114_tims_Slot1-36_1_3662.d	46160	0.8268	0.8365	0.0183			2	2	0	0			5 15 15 21 15 0 0 0 0	IADPFFRSA	O00481|BT3A1_HUMAN:O00478|BT3A3_HUMAN:P78410|BT3A2_HUMAN	DB Search	IADPFFRSA	IADPFFRSA
1343	GTDDHTLIR	35.43	1026.51	9	55.6	9	2	514.263	2	13.7656	-1.2031	0.74	683164	Neo_sh14_patient1_HLAI_0412_HM1114_tims_Slot1-36_1_3662.d	14860	0.8373	0.847	0.0178			1	1	0	0			0 0 23 23 81 21 0 0 5	GTDDHTLIR	P08758|ANXA5_HUMAN	DB Search	GTDDHTLIR	GTDDHTLIR
1344	RLAEPSQM(+15.99)LK	31.7	1187.63	10	60	10	9.6	594.83	2	14.8271	-0.11	0.62	736148	Neo_sh14_patient1_HLAI_0412_HM1114_tims_Slot1-36_1_3662.d	16436	0.9028	0.9125	0.0323			1	1	0	0	Oxidation (M)	M8:Oxidation (M):1000.00	0 0 0 0 17 17 73 12 12 5	RLAEPSQM(+15.99)LK	P35222|CTNB1_HUMAN	DB Search	RLAEPSQMLK	RLAEPSQMLK
1345	MPVKQPYYL	40.86	1137.59	9	77.8	9	4.8	569.805	2	38.4544	-1.7236	0.58	1898414	Neo_sh14_patient1_HLAI_0412_HM1114_tims_Slot1-36_1_3662.d	42218	0.8796	0.8893	0.0256			1	1	0	0			5 66 51 31 6 0 0 15 5	MPVKQPYYL	Q92540|SMG7_HUMAN	DB Search	MPVKQPYYL
1346	LPFKEGHIL	18.46	1052.6	9	55.6	9	2.4	527.309	2	36.9506	1.4474	0.72	1823220	Neo_sh14_patient1_HLAI_0412_HM1114_tims_Slot1-36_1_3662.d	40464	0.8555	0.8652	0.0196	187	3210	1	1	1	1			5 66 66 9 0 0 4 0 0	LPFKEGHIL	Q8WUH2|TGFA1_HUMAN	DB Search	LPFKEGHIL
1347	IPHM(+15.99)DIEAL	16.26	1053.52	9	55.6	9	0.2	527.766	2	34.4373	-0.8842	0.78	1699256	Neo_sh14_patient1_HLAI_0412_HM1114_tims_Slot1-36_1_3662.d	37676	0.8563	0.866	-0.0011			1	1	0	0	Oxidation (M)	M4:Oxidation (M):1000.00	0 0 0 0 12 55 88 29 5	IPHM(+15.99)DIEAL	P62906|RL10A_HUMAN	DB Search	IPHMDIEAL	IPHMDIEAL
1348	FPSGIIKVF	45.45	1006.59	9	77.8	9	0.4	504.3	2	54.2026	-0.9557	0.8	2675003	Neo_sh14_patient1_HLAI_0412_HM1114_tims_Slot1-36_1_3662.d	55031	0.8268	0.8365	0.0283			3	3	0	0			5 20 10 8 13 24 0 0 5	FPSGIIKVF	Q0JRZ9|FCHO2_HUMAN	DB Search	FPSGIIKVF	FPSGIIKVF
1349	FPGSEDVKL	44.12	990.502	9	100	9	3.4	496.26	2	37.9996	-8.9176	0.66	1875899	Neo_sh14_patient1_HLAI_0412_HM1114_tims_Slot1-36_1_3662.d	41735	0.8032	0.8129	0.0319			4	4	0	0			5 67 8 2 2 2 9 4 4	FPGSEDVKL	P11926|DCOR_HUMAN	DB Search	FPGSEDVKL	FPGSEDVKL
1350	YPESTVGTL	24.42	965.471	9	66.7	9	4.4	483.745	2	36.37	-3.6299	0.51	1795025	Neo_sh14_patient1_HLAI_0412_HM1114_tims_Slot1-36_1_3662.d	39809	0.7835	0.7932	0.0317			1	1	0	0			0 0 0 11 11 36 36 7 5	YPESTVGTL	P53355|DAPK1_HUMAN	DB Search	YPESTVGTL
1351	MPHHDASTF	42.74	1041.43	9	100	9	-4.2	521.722	2	13.1404	-1.4452	0.77	649052	Neo_sh14_patient1_HLAI_0412_HM1114_tims_Slot1-36_1_3662.d	13796	0.8083	0.8179	0.0369	2540	32800	3	3	1	1			5 44 15 6 4 44 57 11 5	MPHHDASTF	Q02809|PLOD1_HUMAN	DB Search	MPHHDASTF	MPHHDASTF
1352	HPFDQRIIL	29.39	1137.63	9	77.8	9	7.3	569.826	2	40.5377	2.8892	0.79	2001643	Neo_sh14_patient1_HLAI_0412_HM1114_tims_Slot1-36_1_3662.d	44467	0.8776	0.8873	0.0375			1	1	0	0			5 33 17 17 0 0 4 4 4	HPFDQRIIL	Q6RI45|BRWD3_HUMAN	DB Search	HPFDQRIIL
1353	GM(+15.99)AERIPEL	21.15	1030.51	9	22.2	9	-7.2	516.259	2	33.9444	2.5481	0.65	1674869	Neo_sh14_patient1_HLAI_0412_HM1114_tims_Slot1-36_1_3662.d	37157	0.7978	0.8075	0.0474			1	1	0	0	Oxidation (M)	M2:Oxidation (M):1000.00	0 0 19 0 0 0 0 0 5	GM(+15.99)AERIPEL	O95573|ACSL3_HUMAN	DB Search	GMAERIPEL	GMAERIPEL
1354	VPFGAAHIL	32.24	923.523	9	77.8	9	7.2	462.772	2	46.4803	-0.8313	0.73	2294836	Neo_sh14_patient1_HLAI_0412_HM1114_tims_Slot1-36_1_3662.d	49408	0.8121	0.8218	0.003			1	1	0	0			5 56 66 0 0 2 7 5 5	VPFGAAHIL	P07550|ADRB2_HUMAN	DB Search	VPFGAAHIL
1355	AVAQAIMSK	38.78	917.5	9	77.8	9	1.6	459.758	2	19.4489	-3.7131	0.78	966897	Neo_sh14_patient1_HLAI_0412_HM1114_tims_Slot1-36_1_3662.d	23193	0.7819	0.7916	0.0232			2	2	0	0			0 0 13 13 4 4 2 2 4	AVAQAIMSK	P36269|GGT5_HUMAN	DB Search	AVAQAIMSK
1356	VPVPRVDVL	13.01	992.602	9	33.3	9	0.7	497.309	2	47.8804	-2.5284	0.86	2363874	Neo_sh14_patient1_HLAI_0412_HM1114_tims_Slot1-36_1_3662.d	50514	0.811	0.8206	0.0442			1	1	0	0			5 20 20 0 0 0 0 1 1	VPVPRVDVL	O15067|PUR4_HUMAN	DB Search	VPVPRVDVL	VPVPRVDVL
1357	IPVETHRAL	35.7	1034.59	9	66.7	9	-0.5	518.301	2	18.5773	-1.7751	0.94	923424	Neo_sh14_patient1_HLAI_0412_HM1114_tims_Slot1-36_1_3662.d	21948	0.8629	0.8726	0.0023			1	1	0	0			5 57 90 45 18 2 0 0 0	IPVETHRAL	Q9HD20|AT131_HUMAN	DB Search	IPVETHRAL	IPVETHRAL
1358	LLDEEISRV	40.45	1072.58	9	77.8	9	-1.6	537.295	2	38.5499	0.6785	0.95	1904063	Neo_sh14_patient1_HLAI_0412_HM1114_tims_Slot1-36_1_3662.d	42359	0.8466	0.8563	0.0285	4340	48600	2	2	1	1			5 30 23 18 7 7 0 0 2	LLDEEISRV	Q96PU8|QKI_HUMAN	DB Search	LLDEEISRV	LLDEEISRV
1359	TVAHKIMQK	48.39	1054.6	9	55.6	9	6.7	528.309	2	5.4975	-6.049	0.75	269821	Neo_sh14_patient1_HLAI_0412_HM1114_tims_Slot1-36_1_3662.d	1765	0.8532	0.8629	0.032			3	3	0	0			0 0 86 98 32 29 7 0 0	TVAHKIMQK	Q96I25|SPF45_HUMAN	DB Search	TVAHKIMQK	TVAHKIMQK
1360	TVNPVAIHK	44.53	977.566	9	55.6	9	-0.3	489.79	2	16.4975	-0.4948	0.89	819250	Neo_sh14_patient1_HLAI_0412_HM1114_tims_Slot1-36_1_3662.d	18754	0.8206	0.8303	0.0145	569	9330	2	2	1	1			2 2 67 11 11 0 0 0 0	TVNPVAIHK	P10070|GLI2_HUMAN	DB Search	TVNPVAIHK	TVNPVAIHK
1361	VLGPTPVQK	41.45	937.56	9	77.8	9	5.6	469.79	2	19.594	-2.1895	0.91	972555	Neo_sh14_patient1_HLAI_0412_HM1114_tims_Slot1-36_1_3662.d	23343	0.8129	0.8226	0.0023	2860	40200	3	3	2	2			5 29 13 13 19 3 3 0 0	VLGPTPVQK	Q8WU20|FRS2_HUMAN	DB Search	VLGPTPVQK	VLGPTPVQK
1362	RVFENIVAV	24.15	1045.59	9	66.7	9	-4.1	523.801	2	44.6637	-0.2234	0.89	2205211	Neo_sh14_patient1_HLAI_0412_HM1114_tims_Slot1-36_1_3662.d	47911	0.8276	0.8373	0.0475			2	2	0	0			0 0 0 3 8 80 46 7 5	RVFENIVAV	Q13077|TRAF1_HUMAN	DB Search	RVFENIVAV	RVFENIVAV
1363	NPEHASVAM	25.94	954.423	9	55.6	9	2.3	478.22	2	15.6566	-2.2824	0.74	775818	Neo_sh14_patient1_HLAI_0412_HM1114_tims_Slot1-36_1_3662.d	17550	0.7866	0.7962	0.0186	8250	124000	4	4	1	1			3 0 0 0 0 59 42 42 5	NPEHASVAM	P98179|RBM3_HUMAN	DB Search	NPEHASVAM	NPEHASVAM
1364	GTM(+15.99)TGMLYK	28.11	1016.47	9	55.6	9	5.5	509.244	2	19.2263	-1.126	0.81	957428	Neo_sh14_patient1_HLAI_0412_HM1114_tims_Slot1-36_1_3662.d	22904	0.8102	0.8199	0.045	1510	13200	1	1	1	1	Oxidation (M)	M3:Oxidation (M):28.36	0 0 63 47 7 7 30 0 0	GTM(+15.99)TGMLYK	Q5SRD1|TI23B_HUMAN:O14925|TIM23_HUMAN	DB Search	GTMTGMLYK	GTMTGMLYK
1365	LPESTHVEF	37.7	1057.51	9	66.7	9	1.3	529.762	2	34.7786	-0.2682	0.61	1716143	Neo_sh14_patient1_HLAI_0412_HM1114_tims_Slot1-36_1_3662.d	38039	0.8125	0.8222	0.0426			2	2	0	0			5 54 17 3 2 0 4 0 0	LPESTHVEF	Q08AF3|SLFN5_HUMAN	DB Search	LPESTHVEF	LPESTHVEF
1366	RLYPTPRVR	44.27	1156.68	9	100	9	3.2	386.569	3	16.2691	2.1529	0.65	800403	Neo_sh14_patient1_HLAI_0412_HM1114_tims_Slot1-36_1_3662.d	18267	0.732	0.7417	0.0131	85300	370000	11	11	2	2			5 2 2 6 6 4 4 5 5	RLYPTPRVR	Q9NXW2|DJB12_HUMAN	DB Search	RLYPTPRVR	RLYPTPRVR
1367	STMGYM(+15.99)MAK	15.87	1034.42	9	55.6	9	8.3	518.223	2	18.1605	-1.2312	0.87	902617	Neo_sh14_patient1_HLAI_0412_HM1114_tims_Slot1-36_1_3662.d	21337	0.8261	0.8358	0.0291			1	1	0	0	Oxidation (M)	M6:Oxidation (M):0.00	4 4 43 16 7 0 0 0 0	STMGYM(+15.99)MAK	Q58FF7|H90B3_HUMAN:P08238|HS90B_HUMAN	DB Search	STMGYMMAK	STMGYMMAK
1368	QTFQRVFTK	35.71	1153.62	9	100	9	-5.4	577.816	2	20.472	0.1515	0.67	1017890	Neo_sh14_patient1_HLAI_0412_HM1114_tims_Slot1-36_1_3662.d	24614	0.8834	0.8931	0.0417			1	1	0	0			5 60 13 13 19 8 8 9 5	QTFQRVFTK	Q15436|SC23A_HUMAN	DB Search	QTFQRVFTK	QTFQRVFTK
1369	KLPHRLIEK	31.78	1132.71	9	77.8	9	6.3	567.365	2	10.54	-0.8981	0.94	521727	Neo_sh14_patient1_HLAI_0412_HM1114_tims_Slot1-36_1_3662.d	9483	0.8726	0.8823	0.0526	1200	21800	5	5	1	1			5 11 15 5 5 1 1 3 3	KLPHRLIEK	O14503|BHE40_HUMAN:Q9C0J9|BHE41_HUMAN	DB Search	KLPHRLIEK	KLPHRLIEK
1370	KLSIAVKNK	35.64	999.644	9	100	9	6.5	500.833	2	10.8055	1.0312	0.88	535085	Neo_sh14_patient1_HLAI_0412_HM1114_tims_Slot1-36_1_3662.d	9989	0.8431	0.8528	0.012			1	1	0	0			5 34 10 10 13 13 7 5 5	KLSIAVKNK	P32926|DSG3_HUMAN	DB Search	KLSIAVKNK
1371	KIGSIIFQV	30.8	1003.61	9	55.6	9	6.4	502.814	2	53.2548	2.9176	0.88	2628029	Neo_sh14_patient1_HLAI_0412_HM1114_tims_Slot1-36_1_3662.d	53957	0.8203	0.8299	0.0349			1	1	0	0			0 0 0 0 7 41 48 13 5	KIGSIIFQV	Q460N5|PAR14_HUMAN	DB Search	KIGSIIFQV	KIGSIIFQV
1372	KVLGIVVGV	10.98	882.59	9	33.3	9	4.6	442.304	2	48.2967	1.1294	0.78	2384391	Neo_sh14_patient1_HLAI_0412_HM1114_tims_Slot1-36_1_3662.d	50835	0.7912	0.8009	0.0239			1	1	0	0			0 0 0 0 2 39 5 0 0	KVLGIVVGV	A5YKK6|CNOT1_HUMAN	DB Search	KVLGIVVGV	KVLGIVVGV
1373	LPPGPDPLL	15.34	917.522	9	55.6	9	-0.3	459.768	2	54.013	-2.2822	0.51	2665546	Neo_sh14_patient1_HLAI_0412_HM1114_tims_Slot1-36_1_3662.d	54754	0.785	0.7947	0.0101			1	1	0	0			0 0 0 0 2 2 75 36 5	LPPGPDPLL	Q14005|IL16_HUMAN	DB Search	LPPGPDPLL	LPPGPDPLL
1374	RVKTNVPVK	18.42	1039.65	9	44.4	9	-3.2	520.831	2	7.7729	-1.1228	0.66	383218	Neo_sh14_patient1_HLAI_0412_HM1114_tims_Slot1-36_1_3662.d	5002	0.8489	0.8586	0.0262			2	2	0	0			5 0 0 0 0 78 6 0 5	RVKTNVPVK	Q9UKM9|RALY_HUMAN	DB Search	RVKTNVPVK	RVKTNVPVK
1375	RIIEKVIHR	38.23	1162.73	9	77.8	9	1.9	388.585	3	13.2347	1.6326	0.82	656619	Neo_sh14_patient1_HLAI_0412_HM1114_tims_Slot1-36_1_3662.d	14019	0.6942	0.7038	0.021			4	4	0	0			0 0 2 16 73 87 23 2 3	RIIEKVIHR	Q14566|MCM6_HUMAN	DB Search	RIIEKVIHR	RIIEKVIHR
1376	FASHVSPEV	36.39	971.471	9	88.9	9	0.4	486.743	2	23.3134	-2.5224	0.7	1159622	Neo_sh14_patient1_HLAI_0412_HM1114_tims_Slot1-36_1_3662.d	28646	0.7815	0.7912	0.0536	3510	49100	4	4	1	1			5 12 0 7 42 42 8 8 5	FASHVSPEV	Q9NP61|ARFG3_HUMAN	DB Search	FASHVSPEV	FASHVSPEV
1377	SVSSHLFTHK	53.18	1141.59	10	80	10	-3	571.8	2	13.6081	-0.1383	0.79	673686	Neo_sh14_patient1_HLAI_0412_HM1114_tims_Slot1-36_1_3662.d	14562	0.8699	0.8796	0.0453	2040	30900	2	2	1	1			1 1 28 28 28 15 9 9 3 3	SVSSHLFTHK	Q5TEC3|ZN697_HUMAN	DB Search	SVSSHLFTHK	SVSSHLFTHK
1378	HLQFPGAVY	32.16	1030.52	9	55.6	9	-5	516.266	2	44.2851	-0.9388	0.87	2186592	Neo_sh14_patient1_HLAI_0412_HM1114_tims_Slot1-36_1_3662.d	47652	0.8117	0.8214	0.0534			1	1	0	0			0 0 0 0 5 5 45 19 5	HLQFPGAVY	P55211|CASP9_HUMAN	DB Search	HLQFPGAVY	HLQFPGAVY
1379	GM(+15.99)YIFLHTV	35.26	1095.54	9	44.4	9	7	548.782	2	47.7494	1.4813	0.82	2354547	Neo_sh14_patient1_HLAI_0412_HM1114_tims_Slot1-36_1_3662.d	50367	0.8462	0.8559	0.0389	300	3960	1	1	1	1	Oxidation (M)	M2:Oxidation (M):1000.00	0 0 33 33 6 6 0 0 0	GM(+15.99)YIFLHTV	Q8N138|ORML3_HUMAN	DB Search	GMYIFLHTV	GMYIFLHTV
1380	YANSKAVTL	45.32	965.518	9	100	9	5.5	483.769	2	20.6022	-0.6128	0.76	1019788	Neo_sh14_patient1_HLAI_0412_HM1114_tims_Slot1-36_1_3662.d	24676	0.8013	0.811	0.0339	16700	160000	3	3	1	1			5 57 57 14 16 39 90 21 5	YANSKAVTL	Q6UXN9|WDR82_HUMAN	DB Search	YANSKAVTL	YANSKAVTL
1381	YPSKQFDVL	25.38	1095.56	9	88.9	9	-0.3	548.787	2	39.3749	-2.236	0.75	1947215	Neo_sh14_patient1_HLAI_0412_HM1114_tims_Slot1-36_1_3662.d	43283	0.8563	0.866	0.0289	6040	31800	1	1	1	1			5 34 12 5 0 6 12 24 5	YPSKQFDVL	Q8N766|EMC1_HUMAN	DB Search	YPSKQFDVL	YPSKQFDVL
1382	SPYGGGHAL	28.56	857.403	9	66.7	9	10.6	429.713	2	16.4174	-0.1464	0.94	815491	Neo_sh14_patient1_HLAI_0412_HM1114_tims_Slot1-36_1_3662.d	18667	0.7599	0.7695	0.0053			2	2	0	0			5 10 67 6 3 3 0 0 0	SPYGGGHAL	Q96NU1|SAM11_HUMAN	DB Search	SPYGGGHAL	SPYGGGHAL
1383	FAHTNVESL	36.53	1016.49	9	77.8	9	3.2	509.255	2	24.5604	-3.1305	0.73	1220220	Neo_sh14_patient1_HLAI_0412_HM1114_tims_Slot1-36_1_3662.d	30492	0.8288	0.8385	0.0264	3110	64500	1	1	1	1			0 0 8 15 24 76 60 22 5	FAHTNVESL	P30101|PDIA3_HUMAN	DB Search	FAHTNVESL	FAHTNVESL
1384	AIYAKPANK	34.66	974.555	9	44.4	9	-7.9	488.281	2	8.6069	-3.3721	0.86	424974	Neo_sh14_patient1_HLAI_0412_HM1114_tims_Slot1-36_1_3662.d	6366	0.8203	0.8299	0.0349			1	1	0	0			0 0 54 54 58 19 0 0 0	AIYAKPANK	O15145|ARPC3_HUMAN	DB Search	AIYAKPANK	AIYAKPANK
1385	VAYLQAHAL	32.44	984.539	9	66.7	9	-1.6	493.276	2	35.3094	1.9367	0.69	1742400	Neo_sh14_patient1_HLAI_0412_HM1114_tims_Slot1-36_1_3662.d	38592	0.8547	0.8644	0.0004			1	1	0	0			5 40 61 29 29 46 0 0 0	VAYLQAHAL	Q07960|RHG01_HUMAN	DB Search	VAYLQAHAL	VAYLQAHAL
1386	IYDGPIHL	24.3	926.486	8	62.5	8	5.8	464.253	2	43.1497	-0.6589	0.81	2130654	Neo_sh14_patient1_HLAI_0412_HM1114_tims_Slot1-36_1_3662.d	46794	0.7889	0.7986	0.0263			1	1	0	0			5 90 40 10 0 0 0 5	IYDGPIHL	Q9UHN6|CEIP2_HUMAN	DB Search	IYDGPIHL	IYDGPIHL
1387	FIISRTQAL	45.22	1047.61	9	44.4	9	0.4	524.811	2	39.6627	1.3019	0.89	1954730	Neo_sh14_patient1_HLAI_0412_HM1114_tims_Slot1-36_1_3662.d	43454	0.847	0.8567	0.0382	4330	50000	2	2	1	1			5 8 28 2 1 1 1 0 0	FIISRTQAL	Q92973|TNPO1_HUMAN	DB Search	FIISRTQAL	FIISRTQAL
1388	FLHDNM(+15.99)VEI	11.71	1132.52	9	44.4	9	-0.8	567.268	2	37.6209	0.2847	0.72	1857131	Neo_sh14_patient1_HLAI_0412_HM1114_tims_Slot1-36_1_3662.d	41327	0.8784	0.8881	0.0168			1	1	0	0	Oxidation (M)	M6:Oxidation (M):1000.00	0 0 0 6 20 93 36 0 0	FLHDNM(+15.99)VEI	P49916|DNLI3_HUMAN	DB Search	FLHDNMVEI	FLHDNMVEI
1389	KTYSTFSGLAK	37.99	1201.63	11	63.6	11	-1	601.824	2	21.4552	0.3614	0.83	1065091	Neo_sh14_patient1_HLAI_0412_HM1114_tims_Slot1-36_1_3662.d	25915	0.9075	0.9172	0.0276	363	5980	1	1	1	1			5 98 95 49 27 3 0 0 0 0 5	KTYSTFSGLAK	O43623|SNAI2_HUMAN	DB Search	KTYSTFSGLAK	KTYSTFSGLAK
1390	HPYQPDPKM	51.84	1111.51	9	100	9	1.8	556.764	2	15.5492	0.3007	0.83	770158	Neo_sh14_patient1_HLAI_0412_HM1114_tims_Slot1-36_1_3662.d	17398	0.8358	0.8454	0.0594	9680	90400	4	4	1	1			5 10 8 8 2 2 13 2 2	HPYQPDPKM	O00257|CBX4_HUMAN	DB Search	HPYQPDPKM	HPYQPDPKM
1391	MPQDFKASL	44.44	1035.51	9	77.8	9	2.6	518.762	2	36.4079	-2.6179	0.7	1796921	Neo_sh14_patient1_HLAI_0412_HM1114_tims_Slot1-36_1_3662.d	39869	0.8361	0.8458	0.029	915	15300	7	7	1	1			5 52 40 7 5 2 2 0 0	MPQDFKASL	O94956|SO2B1_HUMAN	DB Search	MPQDFKASL
1392	SPDPSKHLL	43.91	992.529	9	100	9	3.5	497.274	2	19.5907	0.7103	0.91	970672	Neo_sh14_patient1_HLAI_0412_HM1114_tims_Slot1-36_1_3662.d	23296	0.8206	0.8303	0.0045	889	11300	1	1	1	1			5 5 46 12 3 3 4 2 2	SPDPSKHLL	Q38SD2|LRRK1_HUMAN	DB Search	SPDPSKHLL	SPDPSKHLL
1393	LPASEIAKL	19.89	940.559	9	100	9	18.6	471.296	2	38.1511	1.1272	0.79	1883400	Neo_sh14_patient1_HLAI_0412_HM1114_tims_Slot1-36_1_3662.d	41892	0.8071	0.8168	0.0181			1	1	0	0			5 76 36 11 3 8 3 3 5	LPASEIAKL	Q96PQ7|KLHL5_HUMAN	DB Search	LPASEIAKL
1394	ALHRGLLTK	18.88	1007.62	9	22.2	9	0.4	504.819	2	11.0333	-3.7762	0.63	546462	Neo_sh14_patient1_HLAI_0412_HM1114_tims_Slot1-36_1_3662.d	10350	0.8598	0.8695	0.0154			1	1	0	0			0 0 0 0 0 32 43 0 0	ALHRGLLTK	O14686|KMT2D_HUMAN	DB Search	ALHRGLLTK
1395	LLHDGIPVV	23.36	961.56	9	33.3	9	-3.4	481.785	2	44.7772	-1.1166	0.69	2210810	Neo_sh14_patient1_HLAI_0412_HM1114_tims_Slot1-36_1_3662.d	48002	0.8071	0.8168	0.0281			1	1	0	0			0 0 0 0 7 14 0 0 5	LLHDGIPVV	O14727|APAF_HUMAN	DB Search	LLHDGIPVV	LLHDGIPVV
1396	AVGPKVALK	31.06	881.57	9	88.9	9	7.2	441.795	2	17.0236	0.1535	0.76	845804	Neo_sh14_patient1_HLAI_0412_HM1114_tims_Slot1-36_1_3662.d	19604	0.7796	0.7893	0.0356			1	1	0	0			5 12 9 7 7 4 0 12 5	AVGPKVALK	P78325|ADAM8_HUMAN	DB Search	AVGPKVALK	AVGPKVALK
1397	GTYTIHAQK	49.56	1017.52	9	66.7	9	8.3	509.774	2	10.5779	0.4763	0.69	523658	Neo_sh14_patient1_HLAI_0412_HM1114_tims_Slot1-36_1_3662.d	9578	0.8555	0.8652	-0.0004			2	2	0	0			0 0 18 95 45 22 8 0 5	GTYTIHAQK	Q15155|NOMO1_HUMAN:P69849|NOMO3_HUMAN:Q5JPE7|NOMO2_HUMAN	DB Search	GTYTIHAQK	GTYTIHAQK
1398	SPHGGALVM	36.36	867.427	9	66.7	9	1.3	434.721	2	21.4188	0.691	0.8	1065097	Neo_sh14_patient1_HLAI_0412_HM1114_tims_Slot1-36_1_3662.d	25921	0.7873	0.797	-0.0122	1580	22200	3	3	1	1			0 0 0 3 3 51 91 21 5	SPHGGALVM	Q8N201|INT1_HUMAN	DB Search	SPHGGALVM	SPHGGALVM
1399	HPSASYNQL	24.86	1015.47	9	55.6	9	-1.7	508.743	2	18.2741	-0.67	0.7	908273	Neo_sh14_patient1_HLAI_0412_HM1114_tims_Slot1-36_1_3662.d	21485	0.8052	0.8148	0.05	1130	15100	2	2	1	1			0 0 0 0 31 90 71 40 5	HPSASYNQL	Q15652|JHD2C_HUMAN	DB Search	HPSASYNQL	HPSASYNQL
1400	GTFRHTLWK	27.96	1144.61	9	66.7	9	1.8	573.315	2	18.5015	1.6925	0.75	919657	Neo_sh14_patient1_HLAI_0412_HM1114_tims_Slot1-36_1_3662.d	21853	0.885	0.8947	0.0402			1	1	0	0			0 0 0 11 13 14 21 36 5	GTFRHTLWK	Q63HN8|RN213_HUMAN	DB Search	GTFRHTLWK
1401	NPQERTLTL	40.48	1070.57	9	100	9	-0.4	536.293	2	24.6005	-11.6209	0.6	1224082	Neo_sh14_patient1_HLAI_0412_HM1114_tims_Slot1-36_1_3662.d	30682	0.854	0.8637	0.0212	880	23700	1	1	1	1			5 79 79 11 7 14 21 21 5	NPQERTLTL	P08238|HS90B_HUMAN	DB Search	NPQERTLTL	NPQERTLTL
1402	NLLPKLHIV	18	1045.66	9	55.6	9	-1.6	523.839	2	46.8941	6.6715	0.85	2313503	Neo_sh14_patient1_HLAI_0412_HM1114_tims_Slot1-36_1_3662.d	49715	0.8951	0.9048	-0.0199	2360	22700	3	3	1	1			0 0 31 26 17 17 3 0 0	NLLPKLHIV	Q9Y696|CLIC4_HUMAN:O00299|CLIC1_HUMAN	DB Search	NLLPKLHIV	NLLPKLHIV
1403	KLDENSAFL	38.43	1035.52	9	66.7	9	-1.3	518.768	2	35.3473	-1.7658	0.9	1744288	Neo_sh14_patient1_HLAI_0412_HM1114_tims_Slot1-36_1_3662.d	38644	0.8516	0.8613	0.0135			1	1	0	0			0 0 0 5 5 8 42 30 5	KLDENSAFL	Q13813|SPTN1_HUMAN	DB Search	KLDENSAFL	KLDENSAFL
1404	KVAENVIRQK	46.7	1183.7	10	80	10	-0.3	592.859	2	9.3272	2.0909	0.95	461040	Neo_sh14_patient1_HLAI_0412_HM1114_tims_Slot1-36_1_3662.d	7548	0.9125	0.9222	0.0126	1190	22300	2	2	1	1			5 36 26 21 8 8 3 2 1 1	KVAENVIRQK	Q6ZSC3|RBM43_HUMAN	DB Search	KVAENVIRQK	KVAENVIRQK
1405	MPGRVEPIL	26.99	1010.56	9	55.6	9	-4.5	506.284	2	40.0831	-0.363	0.65	1979126	Neo_sh14_patient1_HLAI_0412_HM1114_tims_Slot1-36_1_3662.d	43982	0.809	0.8187	0.0361			1	1	0	0			5 19 0 0 3 11 33 0 0	MPGRVEPIL	Q8TAB5|CA216_HUMAN	DB Search	MPGRVEPIL
1406	KINVTVAKK	38.62	999.644	9	88.9	9	3.8	500.831	2	9.0238	0.1531	0.84	445837	Neo_sh14_patient1_HLAI_0412_HM1114_tims_Slot1-36_1_3662.d	7033	0.8098	0.8195	0.0454			1	1	0	0			5 66 10 10 9 3 3 0 5	KINVTVAKK	Q9NW13|RBM28_HUMAN	DB Search	KINVTVAKK	KINVTVAKK
1407	KAYMPLRAK	25.62	1076.62	9	44.4	9	-2.3	539.314	2	12.7753	-1.4028	0.84	635801	Neo_sh14_patient1_HLAI_0412_HM1114_tims_Slot1-36_1_3662.d	13397	0.8641	0.8737	0.0211	4410	62400	1	1	1	1			5 86 50 50 0 0 0 0 0	KAYMPLRAK	Q5T6S3|PHF19_HUMAN	DB Search	KAYMPLRAK
1408	RLNEAAVTV	33.07	971.54	9	55.6	9	4.3	486.779	2	23.2365	-0.0574	0.92	1153896	Neo_sh14_patient1_HLAI_0412_HM1114_tims_Slot1-36_1_3662.d	28428	0.8052	0.8148	0.04	7970	102000	3	3	1	1			0 0 0 0 14 40 66 19 5	RLNEAAVTV	O95273|CCDB1_HUMAN	DB Search	RLNEAAVTV	RLNEAAVTV
1409	APEEHPVLL	54.2	1003.53	9	100	9	0.9	502.775	2	34.419	1.0959	0.57	1693601	Neo_sh14_patient1_HLAI_0412_HM1114_tims_Slot1-36_1_3662.d	37529	0.8334	0.8431	0.0017	3130000	18200000	17	17	1	1			5 27 5 5 7 84 48 13 5	APEEHPVLL	P60709|ACTB_HUMAN:A5A3E0|POTEF_HUMAN:P63261|ACTG_HUMAN	DB Search	APEEHPVLL	APEEHPVLL
1410	VLYVGSKTK	33.25	993.586	9	100	9	5.8	497.803	2	12.6657	-0.252	0.78	628226	Neo_sh14_patient1_HLAI_0412_HM1114_tims_Slot1-36_1_3662.d	13166	0.8563	0.866	0.0189			1	1	0	0			5 23 36 36 2 2 2 2 3	VLYVGSKTK	P37840|SYUA_HUMAN	DB Search	VLYVGSKTK	VLYVGSKTK
1411	TADGAHFEL	36.37	959.435	9	66.7	9	11	480.73	2	32.9093	-2.0914	0.84	1626075	Neo_sh14_patient1_HLAI_0412_HM1114_tims_Slot1-36_1_3662.d	36099	0.7935	0.8032	0.0216			3	3	0	0			5 52 31 2 2 3 0 0 1	TADGAHFEL	Q8IWX8|CHERP_HUMAN	DB Search	TADGAHFEL	TADGAHFEL
1412	AQYDRYVNK	43.08	1155.57	9	100	9	0.7	578.791	2	13.7888	-0.3893	0.83	681275	Neo_sh14_patient1_HLAI_0412_HM1114_tims_Slot1-36_1_3662.d	14807	0.8668	0.8765	0.0484	620	7590	1	1	1	1			5 15 21 12 2 11 22 20 5	AQYDRYVNK	O60437|PEPL_HUMAN	DB Search	AQYDRYVNK	AQYDRYVNK
1413	KVNIVPVIAK	41.29	1079.71	10	100	10	3.9	540.863	2	32.9553	1.76	0.78	1626079	Neo_sh14_patient1_HLAI_0412_HM1114_tims_Slot1-36_1_3662.d	36103	0.8621	0.8718	0.033	448	5440	1	1	1	1			5 28 11 11 28 6 6 19 15 5	KVNIVPVIAK	Q15019|SEPT2_HUMAN	DB Search	KVNIVPVIAK	KVNIVPVIAK
1414	TSAPTGHTF	26.66	917.424	9	66.7	9	15.8	459.727	2	16.1145	-1.334	0.92	800417	Neo_sh14_patient1_HLAI_0412_HM1114_tims_Slot1-36_1_3662.d	18281	0.7703	0.78	0.0148			2	2	0	0			5 11 31 38 22 2 0 0 0	TSAPTGHTF	Q8IYS2|K2013_HUMAN	DB Search	TSAPTGHTF	TSAPTGHTF
1415	QPASFAIRL	35.3	1001.57	9	66.7	9	4.7	501.793	2	47.2372	2.7756	0.83	2332182	Neo_sh14_patient1_HLAI_0412_HM1114_tims_Slot1-36_1_3662.d	50034	0.8311	0.8408	0.024			2	2	0	0			0 0 94 49 37 9 7 0 5	QPASFAIRL	O75369|FLNB_HUMAN	DB Search	QPASFAIRL	QPASFAIRL
1416	KVYENYPTY	40.28	1175.55	9	88.9	9	1.8	588.783	2	24.3587	-1.8328	0.88	1204997	Neo_sh14_patient1_HLAI_0412_HM1114_tims_Slot1-36_1_3662.d	29957	0.8935	0.9032	0.0216	151000	1360000	7	7	1	1			2 0 4 13 16 29 8 8 5	KVYENYPTY	P35659|DEK_HUMAN	DB Search	KVYENYPTY	KVYENYPTY
1417	HTM(+15.99)EFALVK	46.39	1090.55	9	55.6	9	-0.7	546.281	2	22.8206	1.5145	0.82	1134984	Neo_sh14_patient1_HLAI_0412_HM1114_tims_Slot1-36_1_3662.d	27876	0.8959	0.9056	-0.0007			3	3	0	0	Oxidation (M)	M3:Oxidation (M):1000.00	5 0 0 6 20 29 53 0 0	HTM(+15.99)EFALVK	Q99608|NECD_HUMAN	DB Search	HTMEFALVK	HTMEFALVK
1418	EQRSGDITY	40.86	1067.49	9	55.6	9	-1.4	534.751	2	15.9806	-1.8965	0.83	790925	Neo_sh14_patient1_HLAI_0412_HM1114_tims_Slot1-36_1_3662.d	17969	0.8284	0.8381	0.0268	14000	135000	2	2	1	1			1 1 4 1 1 2 62 37 5	EQRSGDITY	P19174|PLCG1_HUMAN	DB Search	EQRSGDITY	EQRSGDITY
1419	QSNARLLYK	43.12	1091.61	9	77.8	9	-3.9	546.81	2	14.3364	0.251	0.59	709613	Neo_sh14_patient1_HLAI_0412_HM1114_tims_Slot1-36_1_3662.d	15605	0.8513	0.861	0.0539	773	11000	1	1	1	1			5 19 11 0 0 5 24 52 5	QSNARLLYK	P35869|AHR_HUMAN	DB Search	QSNARLLYK	QSNARLLYK
1420	TLSQEVLLK	18.52	1029.61	9	44.4	9	10.7	515.816	2	23.3685	-11.2603	0.03	1159647	Neo_sh14_patient1_HLAI_0412_HM1114_tims_Slot1-36_1_3662.d	28671	0.8528	0.8625	0.0123	642	8200	1	1	1	1			0 0 0 0 0 82 81 25 5	TLSQEVLLK	Q5T2E6|ARMD3_HUMAN	DB Search	TLSQEVLLK
1421	VPDPNVIKL	35.7	993.586	9	55.6	9	0.9	497.801	2	44.3493	-3.5536	0.7	2184714	Neo_sh14_patient1_HLAI_0412_HM1114_tims_Slot1-36_1_3662.d	47610	0.8001	0.8098	0.045	7720	43100	5	5	1	1			5 39 39 1 1 22 15 0 0	VPDPNVIKL	Q9NUU7|DD19A_HUMAN:Q9UMR2|DD19B_HUMAN	DB Search	VPDPNVIKL	VPDPNVIKL
1422	HPMNLPVQL	23.75	1047.55	9	55.6	9	15.2	524.792	2	48.6374	1.8651	0.85	2401185	Neo_sh14_patient1_HLAI_0412_HM1114_tims_Slot1-36_1_3662.d	51105	0.8404	0.8501	0.0247			2	2	0	0			0 0 1 1 27 5 5 5 5	HPMNLPVQL	Q9C0D3|ZY11B_HUMAN	DB Search	HPMNLPVQL
1423	HPFEDGAKL	54.47	1012.5	9	100	9	0.4	507.256	2	20.7322	0.9899	0.6	1032981	Neo_sh14_patient1_HLAI_0412_HM1114_tims_Slot1-36_1_3662.d	25017	0.8048	0.8144	0.0604	14200	101000	6	6	1	1			5 22 14 9 5 8 13 3 3	HPFEDGAKL	O14976|GAK_HUMAN	DB Search	HPFEDGAKL	HPFEDGAKL
1424	IADPNIAKL	16.85	953.555	9	44.4	9	1.7	477.785	2	36.0672	-0.823	0.82	1780020	Neo_sh14_patient1_HLAI_0412_HM1114_tims_Slot1-36_1_3662.d	39492	0.7939	0.8036	0.0312			1	1	0	0			5 14 14 8 0 0 0 0 0	IADPNIAKL	Q9H0H0|INT2_HUMAN	DB Search	IADPNIAKL	IADPNIAKL
1425	HPTVIGESM	35.75	969.459	9	55.6	9	-3.5	485.735	2	23.6924	-2.3456	0.65	1178492	Neo_sh14_patient1_HLAI_0412_HM1114_tims_Slot1-36_1_3662.d	29156	0.797	0.8067	0.0381			1	1	0	0			0 0 0 0 15 16 16 13 5	HPTVIGESM	Q5VWP2|TET5C_HUMAN	DB Search	HPTVIGESM	HPTVIGESM
1426	IPIGIDKAL	38.91	938.58	9	77.8	9	-0.3	470.297	2	45.5561	1.8361	0.92	2244410	Neo_sh14_patient1_HLAI_0412_HM1114_tims_Slot1-36_1_3662.d	48554	0.797	0.8067	0.0281	112000	958000	8	8	1	1			5 44 77 6 6 9 0 0 5	IPIGIDKAL	Q13451|FKBP5_HUMAN	DB Search	IPIGIDKAL	IPIGIDKAL
1427	ILNDKKLFK	31.09	1117.69	9	77.8	9	0.4	559.85	2	19.752	-0.7582	0.65	982003	Neo_sh14_patient1_HLAI_0412_HM1114_tims_Slot1-36_1_3662.d	23611	0.8683	0.878	0.0668			1	1	0	0			5 57 25 25 5 5 1 1 5	ILNDKKLFK	Q5T1V6|DDX59_HUMAN	DB Search	ILNDKKLFK	ILNDKKLFK
1428	KLSDLQTQL	23.98	1044.58	9	88.9	9	3.7	523.3	2	34.2098	-0.5125	0.83	1687969	Neo_sh14_patient1_HLAI_0412_HM1114_tims_Slot1-36_1_3662.d	37405	0.8509	0.8606	0.0243	903	9970	2	2	1	1			5 0 8 8 81 95 70 35 5	KLSDLQTQL	P19387|RPB3_HUMAN	DB Search	KLSDLQTQL	KLSDLQTQL
1429	IPVSRDWEL	21.93	1113.58	9	55.6	9	8.4	557.803	2	44.9664	-1.8424	0.71	2220131	Neo_sh14_patient1_HLAI_0412_HM1114_tims_Slot1-36_1_3662.d	48143	0.8369	0.8466	0.0582			3	3	0	0			5 36 36 0 0 0 0 7 5	IPVSRDWEL	P48634|PRC2A_HUMAN	DB Search	IPVSRDWEL
1430	LPNIHPELL	32.49	1044.6	9	77.8	9	2.9	523.307	2	51.0978	-2.6704	0.67	2522218	Neo_sh14_patient1_HLAI_0412_HM1114_tims_Slot1-36_1_3662.d	52798	0.8381	0.8478	0.0171			1	1	0	0			5 75 7 7 13 0 0 9 5	LPNIHPELL	O75367|H2AY_HUMAN	DB Search	LPNIHPELL
1431	TPISEHAVF	44.5	999.503	9	100	9	2	500.76	2	34.0582	1.0846	0.65	1680471	Neo_sh14_patient1_HLAI_0412_HM1114_tims_Slot1-36_1_3662.d	37251	0.8121	0.8218	0.023			1	1	0	0			5 78 67 37 25 6 31 16 5	TPISEHAVF	Q9P2J5|SYLC_HUMAN	DB Search	TPISEHAVF	TPISEHAVF
1432	ILQEKLQEI	23.24	1112.64	9	100	9	-1.7	557.328	2	36.8625	-0.4737	0.62	1819472	Neo_sh14_patient1_HLAI_0412_HM1114_tims_Slot1-36_1_3662.d	40388	0.8726	0.8823	0.0326			1	1	0	0			5 44 28 28 3 31 31 19 5	ILQEKLQEI	Q4LE39|ARI4B_HUMAN	DB Search	ILQEKLQEI	ILQEKLQEI
1433	RLLEATSYL	26.79	1064.59	9	55.6	9	6.7	533.304	2	43.4903	-0.4066	0.74	2147374	Neo_sh14_patient1_HLAI_0412_HM1114_tims_Slot1-36_1_3662.d	46990	0.8768	0.8865	0.0183			1	1	0	0			0 0 0 0 34 17 17 43 5	RLLEATSYL	O60341|KDM1A_HUMAN	DB Search	RLLEATSYL	RLLEATSYL
1434	SLFSAVHKI	36.39	1000.57	9	55.6	9	4	501.295	2	34.8165	-0.0918	0.83	1718027	Neo_sh14_patient1_HLAI_0412_HM1114_tims_Slot1-36_1_3662.d	38087	0.8652	0.8749	-0.0101			1	1	0	0			0 0 51 6 4 0 4 0 5	SLFSAVHKI	O94905|ERLN2_HUMAN	DB Search	SLFSAVHKI	SLFSAVHKI
1435	SPEDLRLVL	25.61	1040.59	9	88.9	9	-6	521.297	2	51.9303	2.9502	0.75	2562998	Neo_sh14_patient1_HLAI_0412_HM1114_tims_Slot1-36_1_3662.d	53186	0.8451	0.8547	0.0201			1	1	0	0			5 60 51 42 7 0 13 4 4	SPEDLRLVL	Q9BUN1|MENT_HUMAN	DB Search	SPEDLRLVL
1436	KMYEEHLKR	38.68	1232.63	9	77.8	9	-10.6	411.881	3	8.7205	-0.7524	0.62	430670	Neo_sh14_patient1_HLAI_0412_HM1114_tims_Slot1-36_1_3662.d	6554	0.7258	0.7355	-0.0007			2	2	0	0			5 9 9 14 8 8 9 0 0	KMYEEHLKR	P84090|ERH_HUMAN	DB Search	KMYEEHLKR	KMYEEHLKR
1437	HIHKSLIGK	41.3	1031.62	9	77.8	9	2.2	516.82	2	5.5872	-2.1898	0.81	262400	Neo_sh14_patient1_HLAI_0412_HM1114_tims_Slot1-36_1_3662.d	1688	0.828	0.8377	0.0471	92600	257000	12	12	1	1			5 25 24 0 0 13 16 2 2	HIHKSLIGK	P0C0S5|H2AZ_HUMAN:Q71UI9|H2AV_HUMAN	DB Search	HIHKSLIGK	HIHKSLIGK
1438	QLDDLKVEL	22.14	1071.58	9	44.4	9	2.4	536.799	2	48.6418	-3.512	0.67	2399326	Neo_sh14_patient1_HLAI_0412_HM1114_tims_Slot1-36_1_3662.d	51082	0.8478	0.8575	0.0474	200	3340	1	1	1	1			0 0 21 13 13 0 6 0 0	QLDDLKVEL	P42766|RL35_HUMAN	DB Search	QLDDLKVEL	QLDDLKVEL
1439	TVADHIQKV	41.07	1009.56	9	100	9	0.1	505.785	2	15.5844	2.5159	0.9	773962	Neo_sh14_patient1_HLAI_0412_HM1114_tims_Slot1-36_1_3662.d	17530	0.8183	0.828	0.0368			1	1	0	0			5 11 13 13 5 16 19 3 3	TVADHIQKV	Q9Y678|COPG1_HUMAN	DB Search	TVADHIQKV	TVADHIQKV
1440	YAEVGRVL	31.97	905.497	8	50	8	6.1	453.759	2	29.0109	0.0735	0.84	1433713	Neo_sh14_patient1_HLAI_0412_HM1114_tims_Slot1-36_1_3662.d	32845	0.7885	0.7982	0.0267			1	1	0	0			5 78 20 18 0 0 0 0	YAEVGRVL	O75179|ANR17_HUMAN:Q8IWZ3|ANKH1_HUMAN	DB Search	YAEVGRVL	YAEVGRVL
1441	TLSDLRVYL	42.69	1078.6	9	55.6	9	-0.4	540.308	2	53.6715	1.3766	0.82	2648619	Neo_sh14_patient1_HLAI_0412_HM1114_tims_Slot1-36_1_3662.d	54351	0.8959	0.9056	-0.0007			1	1	0	0			5 8 20 20 8 1 1 0 1	TLSDLRVYL	Q9BYN0|SRXN1_HUMAN	DB Search	TLSDLRVYL	TLSDLRVYL
1442	RIIEETLALK	30.06	1184.71	10	50	10	-10.8	593.357	2	33.0988	0.075	0.84	1635432	Neo_sh14_patient1_HLAI_0412_HM1114_tims_Slot1-36_1_3662.d	36276	0.8986	0.9083	0.0466			1	1	0	0			1 0 0 0 0 6 16 16 16 5	RIIEETLALK	O15144|ARPC2_HUMAN	DB Search	RIIEETLALK	RIIEETLALK
1443	ALAATLRVK	27.18	941.602	9	77.8	9	6.7	471.812	2	20.9264	1.1201	0.91	1040553	Neo_sh14_patient1_HLAI_0412_HM1114_tims_Slot1-36_1_3662.d	25245	0.8462	0.8559	-0.0011			2	2	0	0			3 3 56 20 15 2 2 0 0	ALAATLRVK	Q12816|TROP_HUMAN	DB Search	ALAATLRVK	ALAATLRVK
1444	VVMNVVHQL	37.2	1037.57	9	66.7	9	3.5	519.794	2	39.1741	-0.9593	0.77	1934089	Neo_sh14_patient1_HLAI_0412_HM1114_tims_Slot1-36_1_3662.d	43009	0.89	0.8997	-0.0249			1	1	0	0			5 9 92 12 12 43 0 0 0	VVMNVVHQL	Q2M389|WASC4_HUMAN	DB Search	VVMNVVHQL	VVMNVVHQL
1445	FLKPDDIQY	43.01	1137.57	9	88.9	9	4	569.795	2	40.6901	-2.5827	0.76	2005375	Neo_sh14_patient1_HLAI_0412_HM1114_tims_Slot1-36_1_3662.d	44527	0.866	0.8757	0.0392	25800	251000	3	3	1	1			4 4 6 6 0 8 38 12 5	FLKPDDIQY	O75533|SF3B1_HUMAN	DB Search	FLKPDDIQY	FLKPDDIQY
1446	KTYVIKRVK	28.03	1133.73	9	77.8	9	8.3	567.876	2	7.7349	0.694	0.86	381273	Neo_sh14_patient1_HLAI_0412_HM1114_tims_Slot1-36_1_3662.d	4893	0.8966	0.9063	0.0285			1	1	0	0			5 83 60 51 16 4 0 0 3	KTYVIKRVK	P19525|E2AK2_HUMAN	DB Search	KTYVIKRVK	KTYVIKRVK
1447	ITSDRLLIK	22.24	1057.65	9	88.9	9	0.7	529.832	2	23.2699	-5.7169	0.86	1157722	Neo_sh14_patient1_HLAI_0412_HM1114_tims_Slot1-36_1_3662.d	28582	0.8575	0.8672	0.0477	868	18000	2	2	1	1			5 35 3 0 4 10 17 8 5	ITSDRLLIK	Q14194|DPYL1_HUMAN:Q16555|DPYL2_HUMAN:Q14195|DPYL3_HUMAN	DB Search	ITSDRLLIK	ITSDRLLIK
1448	RLDELGGVYL	30.34	1133.61	10	70	10	0	567.811	2	50.9464	0.1441	0.93	2514777	Neo_sh14_patient1_HLAI_0412_HM1114_tims_Slot1-36_1_3662.d	52701	0.89	0.8997	0.0251			3	3	0	0			0 0 0 5 5 4 4 54 17 5	RLDELGGVYL	P04844|RPN2_HUMAN	DB Search	RLDELGGVYL	RLDELGGVYL
1449	AQKNWYISK	48.52	1136.6	9	100	9	4.6	569.309	2	17.1005	-0.5307	0.76	845802	Neo_sh14_patient1_HLAI_0412_HM1114_tims_Slot1-36_1_3662.d	19602	0.8691	0.8788	0.0361	1320	14100	1	1	1	1			2 2 41 41 14 18 3 3 4	AQKNWYISK	P02452|CO1A1_HUMAN	DB Search	AQKNWYISK	AQKNWYISK
1450	KTDKTLVLL	24.06	1029.64	9	55.6	9	8.9	515.834	2	35.4609	2.2373	0.66	1749905	Neo_sh14_patient1_HLAI_0412_HM1114_tims_Slot1-36_1_3662.d	38753	0.8726	0.8823	0.0026			1	1	0	0			0 0 0 0 13 12 12 51 5	KTDKTLVLL	P07737|PROF1_HUMAN	DB Search	KTDKTLVLL	KTDKTLVLL
1451	FPHDNVEDL	22.24	1084.48	9	66.7	9	8.2	543.253	2	32.5305	-5.697	0.68	1607355	Neo_sh14_patient1_HLAI_0412_HM1114_tims_Slot1-36_1_3662.d	35739	0.8485	0.8582	0.0166			2	2	0	0			0 0 0 15 23 40 47 43 5	FPHDNVEDL	Q9H765|ASB8_HUMAN	DB Search	FPHDNVEDL	FPHDNVEDL
1452	IPTEQVNEL	24.06	1041.53	9	66.7	9	8.4	521.779	2	37.848	-4.3439	0.94	1868373	Neo_sh14_patient1_HLAI_0412_HM1114_tims_Slot1-36_1_3662.d	41553	0.8183	0.828	0.0268			1	1	0	0			0 0 0 7 21 62 57 23 5	IPTEQVNEL	Q9BVX2|T106C_HUMAN	DB Search	IPTEQVNEL	IPTEQVNEL
1453	HPMPHEVEI	22.68	1087.51	9	44.4	9	6.9	544.767	2	22.7828	-1.2415	0.56	1133081	Neo_sh14_patient1_HLAI_0412_HM1114_tims_Slot1-36_1_3662.d	27809	0.8458	0.8555	0.0393			1	1	0	0			0 0 10 8 43 73 0 0 0	HPMPHEVEI	O43310|CTIF_HUMAN	DB Search	HPMPHEVEI
1454	VFDPIGHF	35.61	930.46	8	50	8	-3.3	466.236	2	49.5081	3.6143	0.79	2444022	Neo_sh14_patient1_HLAI_0412_HM1114_tims_Slot1-36_1_3662.d	51714	0.7873	0.797	0.0178			4	4	0	0			5 42 65 0 0 17 0 0	VFDPIGHF	O60885|BRD4_HUMAN	DB Search	VFDPIGHF	VFDPIGHF
1455	MPVQDLPRL	36.7	1067.58	9	77.8	9	3.3	534.799	2	46.556	0.0869	0.75	2298578	Neo_sh14_patient1_HLAI_0412_HM1114_tims_Slot1-36_1_3662.d	49478	0.8528	0.8625	0.0223			1	1	0	0			5 50 59 50 22 22 0 0 5	MPVQDLPRL	Q9UJT0|TBE_HUMAN	DB Search	MPVQDLPRL	MPVQDLPRL
1456	VAEENTRVL	37.1	1029.55	9	66.7	9	5.3	515.783	2	19.8034	0.348	0.95	981982	Neo_sh14_patient1_HLAI_0412_HM1114_tims_Slot1-36_1_3662.d	23590	0.8416	0.8513	0.0136	1550	18800	1	1	1	1			5 82 71 32 6 6 0 0 0	VAEENTRVL	Q9Y5T5|UBP16_HUMAN	DB Search	VAEENTRVL	VAEENTRVL
1457	TPIRDSM(+15.99)AL	39.57	1018.51	9	100	9	-2.2	510.262	2	20.472	-0.5307	0.73	1017885	Neo_sh14_patient1_HLAI_0412_HM1114_tims_Slot1-36_1_3662.d	24609	0.8059	0.8156	0.0492			2	2	0	0	Oxidation (M)	M7:Oxidation (M):1000.00	5 39 24 11 6 9 46 55 5	TPIRDSM(+15.99)AL	P20132|SDHL_HUMAN	DB Search	TPIRDSMAL
1458	RLFAPWKRK	24.35	1200.72	9	33.3	9	6	401.251	3	16.4932	-0.4686	0.81	819252	Neo_sh14_patient1_HLAI_0412_HM1114_tims_Slot1-36_1_3662.d	18756	0.7707	0.7804	-0.0255			1	1	0	0			0 0 0 58 90 26 0 0 0	RLFAPWKRK	Q6IA86|ELP2_HUMAN	DB Search	RLFAPWKRK	RLFAPWKRK
1459	TIFGKIIRK	25.13	1074.69	9	44.4	9	-0.2	538.353	2	22.8685	1.9266	0.97	1134971	Neo_sh14_patient1_HLAI_0412_HM1114_tims_Slot1-36_1_3662.d	27863	0.8842	0.8939	0.0309	1810	18700	3	3	1	1			0 0 57 9 9 7 1 0 0	TIFGKIIRK	P49773|HINT1_HUMAN	DB Search	TIFGKIIRK	TIFGKIIRK
1460	YPNERFELL	33.57	1179.59	9	55.6	9	-0.4	590.803	2	47.9575	-0.2001	0.75	2362001	Neo_sh14_patient1_HLAI_0412_HM1114_tims_Slot1-36_1_3662.d	50477	0.8928	0.9025	0.0224	6880	39300	3	3	1	1			5 89 9 5 3 0 0 0 0	YPNERFELL	O94888|UBXN7_HUMAN	DB Search	YPNERFELL	YPNERFELL
1461	FLHDHQAEL	21.86	1108.53	9	77.8	9	7.9	555.277	2	21.0021	0.9705	0.74	1044291	Neo_sh14_patient1_HLAI_0412_HM1114_tims_Slot1-36_1_3662.d	25311	0.871	0.8807	0.0241			1	1	0	0			0 0 7 5 5 49 49 23 5	FLHDHQAEL	O14931|NCTR3_HUMAN	DB Search	FLHDHQAEL	FLHDHQAEL
1462	RIREPALLSK	26.55	1181.72	10	10	10	-4.9	591.867	2	19.1459	3.1067	0.51	951769	Neo_sh14_patient1_HLAI_0412_HM1114_tims_Slot1-36_1_3662.d	22753	0.916	0.9257	0.0191			2	2	0	0			0 0 0 0 0 0 0 4 0 0	RIREPALLSK	Q14527|HLTF_HUMAN	DB Search	RIREPALLSK	RIREPALLSK
1463	FPQM(+15.99)GRFTL	18.57	1111.55	9	44.4	9	3.3	556.783	2	41.7493	2.5023	0.62	2061655	Neo_sh14_patient1_HLAI_0412_HM1114_tims_Slot1-36_1_3662.d	45727	0.8749	0.8846	0.0202			1	1	0	0	Oxidation (M)	M4:Oxidation (M):1000.00	5 96 48 23 0 0 0 0 0	FPQM(+15.99)GRFTL	P15170|ERF3A_HUMAN:Q8IYD1|ERF3B_HUMAN	DB Search	FPQMGRFTL	FPQMGRFTL
1464	RTAVPSFLTK	42.48	1118.64	10	60	10	6.9	560.333	2	29.3514	3.2112	0.83	1450475	Neo_sh14_patient1_HLAI_0412_HM1114_tims_Slot1-36_1_3662.d	33083	0.8815	0.8912	0.0236			3	3	0	0			2 0 0 4 0 0 29 28 14 5	RTAVPSFLTK	Q96QD9|UIF_HUMAN	DB Search	RTAVPSFLTK	RTAVPSFLTK
1465	RVAEKEPINK	42.1	1182.67	10	60	10	-3.2	395.23	3	6.9761	-1.0233	0.79	343196	Neo_sh14_patient1_HLAI_0412_HM1114_tims_Slot1-36_1_3662.d	3536	0.6938	0.7034	0.0514			2	2	0	0			0 0 3 26 57 25 19 9 0 0	RVAEKEPINK	Q12979|ABR_HUMAN	DB Search	RVAEKEPINK	RVAEKEPINK
1466	RLSDVLKRK	39.57	1113.7	9	55.6	9	10.9	372.244	3	12.5897	0.4933	0.93	624448	Neo_sh14_patient1_HLAI_0412_HM1114_tims_Slot1-36_1_3662.d	13060	0.7108	0.7204	0.0044	690	11700	4	4	1	1			1 1 2 6 23 37 14 0 0	RLSDVLKRK	Q14669|TRIPC_HUMAN	DB Search	RLSDVLKRK	RLSDVLKRK
1467	SVYEGKIFTQK	29.78	1298.69	11	9.1	11	4.8	650.354	2	23.5029	-4.9349	0.48	1169047	Neo_sh14_patient1_HLAI_0412_HM1114_tims_Slot1-36_1_3662.d	28891	0.9836	0.9934	0.0015			1	1	0	0			0 0 0 0 0 0 4 0 0 0 0	SVYEGKIFTQK	Q8WYP5|ELYS_HUMAN	DB Search	SVYEGKIFTQK	SVYEGKIFTQK
1468	ILDSGIYRI	32.21	1048.59	9	55.6	9	3.8	525.305	2	45.4584	-3.5217	0.87	2244413	Neo_sh14_patient1_HLAI_0412_HM1114_tims_Slot1-36_1_3662.d	48557	0.8408	0.8505	0.0344			1	1	0	0			5 19 24 9 1 1 1 0 4	ILDSGIYRI	Q9UPZ3|HPS5_HUMAN	DB Search	ILDSGIYRI	ILDSGIYRI
1469	SPESASHQL	27.32	954.441	9	77.8	9	4.8	478.23	2	11.9062	-0.0728	0.68	590194	Neo_sh14_patient1_HLAI_0412_HM1114_tims_Slot1-36_1_3662.d	11854	0.792	0.8017	0.0132			1	1	0	0			5 28 30 30 15 11 5 0 0	SPESASHQL	Q9Y250|LZTS1_HUMAN	DB Search	SPESASHQL	SPESASHQL
1470	HPYIQYNVL	37.65	1145.59	9	55.6	9	1.7	573.802	2	43.4146	-0.918	0.84	2143662	Neo_sh14_patient1_HLAI_0412_HM1114_tims_Slot1-36_1_3662.d	46950	0.8823	0.892	0.0429	222	3460	2	2	1	1			0 0 6 6 36 49 49 1 1	HPYIQYNVL	Q92797|SYMPK_HUMAN	DB Search	HPYIQYNVL
1471	APDKTSTVL	36.9	930.502	9	88.9	9	2.1	466.259	2	17.7383	-3.7789	0.61	879884	Neo_sh14_patient1_HLAI_0412_HM1114_tims_Slot1-36_1_3662.d	20636	0.7753	0.785	0.0398	173	2860	2	2	1	1			5 21 12 0 5 5 37 75 5	APDKTSTVL	Q9NR12|PDLI7_HUMAN	DB Search	APDKTSTVL	APDKTSTVL
1472	AILDKTTNK	45	1002.57	9	77.8	9	1.8	502.294	2	10.1221	-4.8782	0.86	498938	Neo_sh14_patient1_HLAI_0412_HM1114_tims_Slot1-36_1_3662.d	8726	0.8249	0.8346	0.0302	5030	95700	2	2	1	1			4 4 42 14 11 8 1 1 3	AILDKTTNK	P29558|RBMS1_HUMAN:Q15434|RBMS2_HUMAN	DB Search	AILDKTTNK	AILDKTTNK
1473	IIITPTREL	19.72	1054.64	9	44.4	9	-2.8	528.325	2	40.9237	-2.4838	0.95	2020385	Neo_sh14_patient1_HLAI_0412_HM1114_tims_Slot1-36_1_3662.d	44849	0.8602	0.8699	0.025	357	6450	2	2	1	1			5 11 55 55 1 0 0 0 0	IIITPTREL	Q8NHQ9|DDX55_HUMAN	DB Search	IIITPTREL	IIITPTREL
1474	KLPNSVLGK	39.77	954.586	9	77.8	9	-5.5	478.298	2	19.108	0.3545	0.89	949858	Neo_sh14_patient1_HLAI_0412_HM1114_tims_Slot1-36_1_3662.d	22678	0.8137	0.8234	0.0315			2	2	0	0			3 3 12 2 2 2 1 1 2	KLPNSVLGK	Q9H223|EHD4_HUMAN:Q9NZN3|EHD3_HUMAN	DB Search	KLPNSVLGK	KLPNSVLGK
1475	YAYDGKDYIAL	35.22	1290.61	11	72.7	11	1.4	646.315	2	45.4897	-1.0958	0.77	2242544	Neo_sh14_patient1_HLAI_0412_HM1114_tims_Slot1-36_1_3662.d	48524	0.9343	0.944	0.0409	1870	22000	2	2	1	1			0 0 54 11 5 0 42 80 19 15 5	YAYDGKDYIAL	P01889|HLAB_HUMAN	DB Search	YAYDGKDYIAL	YAYDGKDYIAL
1476	GTLNQPLTK	37.49	970.545	9	55.6	9	-12	486.274	2	17.8193	0.0655	0.97	885560	Neo_sh14_patient1_HLAI_0412_HM1114_tims_Slot1-36_1_3662.d	20804	0.7951	0.8048	0.0301			1	1	0	0			0 0 51 22 22 5 5 0 0	GTLNQPLTK	Q15650|TRIP4_HUMAN	DB Search	GTLNQPLTK	GTLNQPLTK
1477	KLGGVVSIK	32.68	899.58	9	88.9	9	0.7	450.798	2	20.2826	0.5403	0.84	1008478	Neo_sh14_patient1_HLAI_0412_HM1114_tims_Slot1-36_1_3662.d	24382	0.8265	0.8361	-0.0013			1	1	0	0			5 52 2 2 6 6 0 12 5	KLGGVVSIK	Q9Y4A5|TRRAP_HUMAN	DB Search	KLGGVVSIK	KLGGVVSIK
1478	YVTERIIAV	32.58	1062.61	9	77.8	9	-7.4	532.307	2	40.8406	-0.3249	0.82	2016625	Neo_sh14_patient1_HLAI_0412_HM1114_tims_Slot1-36_1_3662.d	44761	0.8458	0.8555	0.0393			1	1	0	0			5 10 16 0 0 4 8 7 5	YVTERIIAV	Q9HBL0|TENS1_HUMAN	DB Search	YVTERIIAV	YVTERIIAV
1479	KLGGVIKEK	43.31	970.617	9	88.9	9	2.9	486.317	2	8.8336	-2.0419	0.9	434448	Neo_sh14_patient1_HLAI_0412_HM1114_tims_Slot1-36_1_3662.d	6660	0.8346	0.8443	0.0206	2060	40800	1	1	1	1			5 80 5 1 2 14 5 5 5	KLGGVIKEK	Q9Y2X3|NOP58_HUMAN	DB Search	KLGGVIKEK	KLGGVIKEK
1480	KMYRKMVFY	23.31	1264.65	9	44.4	9	7.6	633.335	2	22.4035	-0.1839	0.67	1114158	Neo_sh14_patient1_HLAI_0412_HM1114_tims_Slot1-36_1_3662.d	27246	0.9323	0.9421	0.0328			2	2	0	0			4 0 0 0 3 4 14 1 1	KMYRKMVFY	Q99538|LGMN_HUMAN	DB Search	KMYRKMVFY
1481	GIAGSLTNK	29.44	859.476	9	55.6	9	-3.7	430.744	2	16.7205	-0.7583	0.86	830618	Neo_sh14_patient1_HLAI_0412_HM1114_tims_Slot1-36_1_3662.d	19106	0.7548	0.7645	0.0303			1	1	0	0			0 0 30 9 3 3 2 0 1	GIAGSLTNK	P06858|LIPL_HUMAN	DB Search	GIAGSLTNK	GIAGSLTNK
1482	DPASLDHKL	37.05	994.508	9	55.6	9	-2.3	498.26	2	19.6763	-3.5503	0.9	978206	Neo_sh14_patient1_HLAI_0412_HM1114_tims_Slot1-36_1_3662.d	23486	0.8431	0.8528	-0.008			1	1	0	0			0 0 82 16 16 25 3 0 0	DPASLDHKL	Q96RU3|FNBP1_HUMAN	DB Search	DPASLDHKL	DPASLDHKL
1483	LMQTEVHHV	46.07	1092.54	9	77.8	9	-4.7	547.274	2	15.6223	-5.2892	0.75	775814	Neo_sh14_patient1_HLAI_0412_HM1114_tims_Slot1-36_1_3662.d	17546	0.8838	0.8935	0.0013			1	1	0	0			5 29 52 23 23 35 32 0 0	LMQTEVHHV	Q6ZSZ5|ARHGI_HUMAN	DB Search	LMQTEVHHV	LMQTEVHHV
1484	GTTEWFHLK	29.04	1117.56	9	66.7	9	5.8	559.788	2	36.5973	0.3759	0.87	1806300	Neo_sh14_patient1_HLAI_0412_HM1114_tims_Slot1-36_1_3662.d	40068	0.8706	0.8803	0.0345	218	3610	2	2	1	1			5 12 45 47 20 20 0 0 0	GTTEWFHLK	Q70J99|UN13D_HUMAN	DB Search	GTTEWFHLK	GTTEWFHLK
1485	RIYAGGEHY	45.64	1064.5	9	33.3	9	1.5	533.26	2	13.5335	-1.5606	0.92	669900	Neo_sh14_patient1_HLAI_0412_HM1114_tims_Slot1-36_1_3662.d	14448	0.8416	0.8513	0.0436	308	5540	1	1	1	1			1 1 1 1 2 6 18 1 1	RIYAGGEHY	O14628|ZN195_HUMAN	DB Search	RIYAGGEHY	RIYAGGEHY
1486	GTYSKIMDH	50.89	1050.48	9	44.4	9	0.6	526.248	2	15.6601	-1.2711	0.72	777720	Neo_sh14_patient1_HLAI_0412_HM1114_tims_Slot1-36_1_3662.d	17616	0.8555	0.8652	0.0196			2	2	0	0			0 0 28 28 28 10 0 0 0	GTYSKIMDH	O75116|ROCK2_HUMAN	DB Search	GTYSKIMDH	GTYSKIMDH
1487	VLSQKVIAH	36.44	993.597	9	100	9	-4.9	497.803	2	15.7653	-0.2431	0.84	781489	Neo_sh14_patient1_HLAI_0412_HM1114_tims_Slot1-36_1_3662.d	17713	0.852	0.8617	0.0231	401	7340	1	1	1	1			5 16 11 11 18 15 10 9 5	VLSQKVIAH	P49914|MTHFS_HUMAN	DB Search	VLSQKVIAH	VLSQKVIAH
1488	EVFSHILKR	43.48	1127.65	9	77.8	9	-1.8	564.829	2	23.0653	-2.0665	0.78	1144412	Neo_sh14_patient1_HLAI_0412_HM1114_tims_Slot1-36_1_3662.d	28124	0.8745	0.8842	0.0506	848	9360	3	3	1	1			3 3 73 31 22 17 4 0 0	EVFSHILKR	P33076|C2TA_HUMAN	DB Search	EVFSHILKR	EVFSHILKR
1489	FPNQGEVKL	43	1030.54	9	100	9	3.7	516.282	2	34.9305	-16.4073	0.69	1723652	Neo_sh14_patient1_HLAI_0412_HM1114_tims_Slot1-36_1_3662.d	38204	0.821	0.8307	0.0341			1	1	0	0			5 29 6 6 25 25 38 6 5	FPNQGEVKL	Q9UIY3|RWD2A_HUMAN	DB Search	FPNQGEVKL
1490	FPHVQTDVL	23.62	1054.54	9	66.7	9	-6.3	528.276	2	42.9605	-1.2857	0.8	2121352	Neo_sh14_patient1_HLAI_0412_HM1114_tims_Slot1-36_1_3662.d	46672	0.8327	0.8423	0.0325			2	2	0	0			0 0 0 5 7 19 20 26 5	FPHVQTDVL	Q9Y6B7|AP4B1_HUMAN	DB Search	FPHVQTDVL	FPHVQTDVL
1491	FPM(+15.99)AHPPNL	41.22	1038.5	9	88.9	9	3.4	520.257	2	35.8778	2.704	0.9	1770617	Neo_sh14_patient1_HLAI_0412_HM1114_tims_Slot1-36_1_3662.d	39269	0.8164	0.8261	0.0288			3	3	0	0	Oxidation (M)	M3:Oxidation (M):1000.00	5 34 15 4 6 26 9 0 3	FPM(+15.99)AHPPNL	Q13435|SF3B2_HUMAN	DB Search	FPMAHPPNL	FPMAHPPNL
1492	RVYSHLKSVLK	40.26	1328.79	11	36.4	11	-0.9	443.938	3	14.4861	0.2149	0.71	719110	Neo_sh14_patient1_HLAI_0412_HM1114_tims_Slot1-36_1_3662.d	15922	0.7459	0.7556	0.0492			2	2	0	0			0 0 0 6 92 39 24 0 0 0 0	RVYSHLKSVLK	Q5TA45|INT11_HUMAN	DB Search	RVYSHLKSVLK	RVYSHLKSVLK
1493	FPVQGVHTV	33.42	982.524	9	44.4	9	0.8	492.269	2	32.4169	-1.6412	0.63	1601712	Neo_sh14_patient1_HLAI_0412_HM1114_tims_Slot1-36_1_3662.d	35604	0.8141	0.8237	0.0211			3	3	0	0			5 75 69 0 0 18 0 0 0	FPVQGVHTV	Q68CP9|ARID2_HUMAN	DB Search	FPVQGVHTV	FPVQGVHTV
1494	MPEKLSHKL	47.5	1081.6	9	77.8	9	-6.4	541.802	2	13.8795	1.1696	0.6	688838	Neo_sh14_patient1_HLAI_0412_HM1114_tims_Slot1-36_1_3662.d	15026	0.8427	0.8524	0.0424			1	1	0	0			5 23 16 7 6 2 2 0 0	MPEKLSHKL	Q9Y2R9|RT07_HUMAN	DB Search	MPEKLSHKL	MPEKLSHKL
1495	ALKNPPINTK	48.87	1094.64	10	50	10	1.5	548.331	2	14.5505	0.8041	0.95	720996	Neo_sh14_patient1_HLAI_0412_HM1114_tims_Slot1-36_1_3662.d	15972	0.871	0.8807	0.0241	78900	554000	6	6	1	1			1 1 19 32 17 2 2 1 1 1	ALKNPPINTK	O15511|ARPC5_HUMAN	DB Search	ALKNPPINTK	ALKNPPINTK
1496	MPVPWPESSL	35.55	1141.55	10	60	10	4.4	571.784	2	54.8087	-5.848	0.76	2704985	Neo_sh14_patient1_HLAI_0412_HM1114_tims_Slot1-36_1_3662.d	55637	0.8493	0.859	0.0358			1	1	0	0			0 0 0 0 8 10 10 17 17 5	MPVPWPESSL	Q14956|GPNMB_HUMAN	DB Search	MPVPWPESSL
1497	AIHSQLLEK	44.18	1037.59	9	55.6	9	1.9	519.802	2	16.6144	-0.8948	0.81	823048	Neo_sh14_patient1_HLAI_0412_HM1114_tims_Slot1-36_1_3662.d	18880	0.8726	0.8823	0.0026	334	5700	1	1	1	1			0 0 84 10 10 36 8 0 0	AIHSQLLEK	O60925|PFD1_HUMAN	DB Search	AIHSQLLEK	AIHSQLLEK
1498	LIVEPSREL	28.19	1054.6	9	44.4	9	2.1	528.31	2	37.333	-1.5158	0.87	1842044	Neo_sh14_patient1_HLAI_0412_HM1114_tims_Slot1-36_1_3662.d	40928	0.8447	0.8544	0.0305	906	10800	1	1	1	1			5 11 38 38 0 0 0 0 0	LIVEPSREL	Q92499|DDX1_HUMAN	DB Search	LIVEPSREL	LIVEPSREL
[truncated: 3,144 more rows]

## Sheet: patient1_denovo
Order	Peptide	-10LgP	Mass	Tag Length	CAA (%)	Length	ppm	m/z	z	RT	Delta RT	MS2 Correlation	Scan	Source File	Precursor Id	1/k0 Start	1/k0 End	Delta 1/k0	Area Sample 5	Intensity Sample 5	#Spec	#Spec Sample 5	#Feature	#Feature Sample 5	PTM	AScore	Positional Confidence	tag(>=0.0%)	Accession	Found By	Stripped	IEDB Epitope	T Cell Assay	dpImmun rank
[truncated: 224 more rows]

[truncated: 8 more sheets: patient2_database, patient2_denovo, patient3_database, patient3_denovo, patient4_database, patient4_denovo, patient5_database, patient5_denovo]
